# Supplementary material for: L-ascorbate prevents non-alcoholic steatohepatitis-based hepatocarcinogenesis in Sod1/Prdx4 double-knockout mice
Source: Research Square preprint supplement (doi:10.21203/rs.3.rs-7368511/v1), 2025-09-05
Supplement: Supplementary file 1 [file aad9dea6e1f205653ce93646.xlsx]

## Sheet: Suppl Table 1
Supplementary Table 1. Comparison of proteome of livers of DKO with WT mice.
Accession	Description	Amino acid length	MW [kDa]	calc. pI	WT (n=4)				DKO (n=4)				DKO + Asc (n=4)					Average (n=4 each)			Standard deviation				WT vs DKO		WT vs DKO + Asc		DKO vs DKO + Asc
																									Ratio	T-test	Ratio	T-test	Ratio	T-test
					W41	W42	W44	W45	M48	M49	M50	M51	A36	A37	A38	A39		WT	DKO	DKO + Asc	WT	DKO	DKO + Asc		DKO/WT	P-value	DKO + Asc /WT	P-value	DKO + Asc /DKO	P-value
P47199	Quinone oxidoreductase OS=Mus musculus GN=Cryz PE=1 SV=1 - [QOR_MOUSE]	331	35.2464	8.07471	6.5316e+07	7.01307e+07	1.00219e+08	1.0855e+08	2.70354e+08	3.82871e+08	3.12216e+08	2.31117e+08	1.08366e+08	1.13221e+08	1.31639e+08	1.59846e+08		8.60539e+07	2.9914e+08	1.28268e+08	1.86436e+07	5.62087e+07	2.01928e+07		3.47619	0.000789523	1.49056	0.037503	0.42879	0.00256433
O88451	Retinol dehydrogenase 7 OS=Mus musculus GN=Rdh7 PE=1 SV=1 - [RDH7_MOUSE]	316	35.6373	8.08936	9.6893e+08	4.52098e+08	6.8196e+08	7.00337e+08	1.00512e+09	9.00391e+08	1.05292e+09	1.17787e+09	8.37694e+08	7.5316e+08	3.71348e+08	5.62669e+08		7.00831e+08	1.03407e+09	6.31218e+08	1.83099e+08	9.96755e+07	1.80093e+08		1.47549	0.0324792	0.90067	0.655301	0.610419	0.0146774
O09173	Homogentisate 1,2-dioxygenase OS=Mus musculus GN=Hgd PE=1 SV=2 - [HGD_MOUSE]	445	49.9275	7.23975	6.1267e+08	7.68679e+08	6.96795e+08	7.32787e+08	1.66597e+09	1.33602e+09	1.99295e+09	2.11856e+09	9.69666e+08	1.35058e+09	1.13009e+09	1.05434e+09		7.02733e+08	1.77838e+09	1.12617e+09	5.78764e+07	3.04171e+08	1.41448e+08		2.53066	0.000950233	1.60256	0.00300424	0.633257	0.0150879
P56391	Cytochrome c oxidase subunit 6B1 OS=Mus musculus GN=Cox6b1 PE=1 SV=2 - [CX6B1_MOUSE]	86	10.0649	8.71924	4.80682e+08	3.74191e+08	3.31563e+08	3.78478e+08	8.44831e+08	1.04849e+09	9.99768e+08	1.09136e+09	5.50448e+08	7.23033e+08	7.51387e+08	8.60501e+08		3.91229e+08	9.96111e+08	7.21342e+08	5.48056e+07	9.31589e+07	1.11215e+08		2.54611	6.91618e-05	1.84379	0.00364735	0.724158	0.0168139
P50172	Corticosteroid 11-beta-dehydrogenase isozyme 1 OS=Mus musculus GN=Hsd11b1 PE=1 SV=3 - [DHI1_MOUSE]	292	32.3427	8.45557	5.04826e+08	5.85418e+08	5.32943e+08	4.37016e+08	9.31032e+08	1.06893e+09	7.87211e+08	8.07632e+08	6.37026e+08	7.84344e+08	5.25305e+08	6.46737e+08		5.15051e+08	8.98701e+08	6.48353e+08	5.35389e+07	1.12635e+08	9.18766e+07		1.74488	0.00178102	1.25881	0.072936	0.721433	0.0245361
Q9Z2U0	Proteasome subunit alpha type-7 OS=Mus musculus GN=Psma7 PE=1 SV=1 - [PSA7_MOUSE]	248	27.8376	8.45557	1.59512e+07	1.73348e+06	1.73348e+06	1.73348e+06	6.1349e+07	1.73348e+06	6.80767e+07	4.39083e+07	1.73348e+06	1.73348e+06	1.73348e+06	1.73348e+06		5.28791e+06	4.37669e+07	1.73348e+06	6.15646e+06	2.58211e+07	0		8.27678	0.0458571	0.327819	0.355918	0.0396071	0.0303721
O88986	2-amino-3-ketobutyrate coenzyme A ligase, mitochondrial OS=Mus musculus OX=10090 GN=Gcat PE=1 SV=2 - [KBL_MOUSE]	416	44.9019	7.32764	866739	866739	866739	866739	2.55548e+08	866739	2.39473e+08	2.76198e+08	866739	4.89167e+07	866739	866739		866739	1.93022e+08	1.28792e+07	0	1.11702e+08	2.08062e+07		222.699	0.0246507	14.8594	0.355918	0.0667242	0.0334659
P16858	Glyceraldehyde-3-phosphate dehydrogenase OS=Mus musculus GN=Gapdh PE=1 SV=2 - [G3P_MOUSE]	333	35.7872	8.25049	2.52929e+09	2.53874e+09	2.91083e+09	2.71133e+09	3.67682e+09	3.86809e+09	3.99993e+09	3.17337e+09	2.92638e+09	3.1209e+09	2.82085e+09	3.40986e+09		2.67255e+09	3.67955e+09	3.0695e+09	1.55492e+08	3.14012e+08	2.24053e+08		1.3768	0.00250755	1.14853	0.0452248	0.834204	0.0337717
Q01768	Nucleoside diphosphate kinase B OS=Mus musculus GN=Nme2 PE=1 SV=1 - [NDKB_MOUSE]	152	17.3519	7.50342	4.22299e+08	3.64563e+08	4.06647e+08	3.49388e+08	9.63062e+08	8.30225e+08	1.00624e+09	1006391561	8.62138e+08	8.535e+08	657848654	7.22628e+08		3.85724e+08	9.51479e+08	7.74029e+08	2.97641e+07	7.21988e+07	8.69177e+07		2.46673	1.56746e-05	2.00669	0.000331803	0.8135	0.0346374
P29341	Polyadenylate-binding protein 1 OS=Mus musculus GN=Pabpc1 PE=1 SV=2 - [PABP1_MOUSE]	636	70.6259	9.49561	5.06701e+07	6.95219e+07	7.17111e+07	7.75556e+07	1.40256e+08	189092921	1.25978e+08	9.14851e+07	5.80048e+07	1.02198e+08	2.8837e+07	8.56912e+07		6.73647e+07	1.36703e+08	6.86828e+07	1.00761e+07	3.50607e+07	2.79028e+07		2.0293	0.0165689	1.01957	0.94116	0.502423	0.039097
Q9DCU9	4-hydroxy-2-oxoglutarate aldolase, mitochondrial OS=Mus musculus GN=Hoga1 PE=1 SV=1 - [HOGA1_MOUSE]	321	34.6219	7.72314	3.44049e+08	3.48459e+08	5.06757e+08	4.322e+08	7.17981e+08	7.74815e+08	5.08999e+08	8.85205e+08	4.71685e+08	5.64488e+08	4.98793e+08	4.95994e+08		4.07866e+08	7.2175e+08	5.0774e+08	6.70325e+07	1.36758e+08	3.44176e+07		1.76957	0.0117895	1.24487	0.0614614	0.703484	0.0391381
Q61838	Pregnancy zone protein OS=Mus musculus GN=Pzp PE=1 SV=3 - [PZP_MOUSE]	1495	165.748	6.68311	3.62959e+07	2.60022e+06	2.60022e+06	2.60022e+06	1.24986e+08	1.07756e+08	2.74832e+08	7.89798e+07	4.81231e+07	2.60022e+06	5.65646e+07	2.60022e+06		1.10241e+07	1.46638e+08	2.7472e+07	1.45907e+07	7.58155e+07	2.50502e+07		13.3016	0.0227337	2.49199	0.363699	0.187345	0.0414907
P05202	Aspartate aminotransferase, mitochondrial OS=Mus musculus GN=Got2 PE=1 SV=1 - [AATM_MOUSE]	430	47.3812	8.99756	1.05448e+09	1.13015e+09	1.76684e+09	1.69367e+09	4.19069e+09	3.73737e+09	4.7186e+09	4.41686e+09	4.21665e+09	3.11904e+09	2.14448e+09	2.39789e+09		1.41129e+09	4.26588e+09	2.96952e+09	3.21134e+08	3.58023e+08	8.03919e+08		3.02269	4.94593e-05	2.10412	0.0206456	0.696109	0.043406
Q9ET01	Glycogen phosphorylase, liver form OS=Mus musculus GN=Pygl PE=1 SV=4 - [PYGL_MOUSE]	850	97.401	7.09326	525537869	2.49034e+08	2.37939e+08	3.07649e+08	8.49297e+08	8.70731e+08	8.25619e+08	4.49117e+08	5.99132e+08	4.34858e+08	4.34963e+08	4.3289e+08		3.3004e+08	7.48691e+08	4.75461e+08	1.15937e+08	1.73694e+08	7.14065e+07		2.26849	0.0132667	1.44062	0.113818	0.635056	0.0452886
Q9D2G2	Dihydrolipoyllysine-residue succinyltransferase component of 2-oxoglutarate dehydrogenase complex, mitochondrial OS=Mus musculus GN=Dlst PE=1 SV=1 - [ODO2_MOUSE]	454	48.9635	8.95361	1.01854e+08	9.81215e+07	1.99315e+08	1.01163e+08	2.39597e+08	2.46335e+08	540171471	461424859	2.15104e+08	2.01428e+08	1.20814e+08	1.60765e+08		1.25113e+08	3.71882e+08	1.74528e+08	4.28633e+07	1.3191e+08	3.68938e+07		2.97236	0.0216187	1.39496	0.18095	0.469309	0.0468061
P37040	NADPH--cytochrome P450 reductase OS=Mus musculus GN=Por PE=1 SV=2 - [NCPR_MOUSE]	678	76.9953	5.52881	1.39757e+08	1.56549e+08	1.26033e+08	1.5754e+08	1.07568e+08	3.33263e+07	6.43862e+07	1.16489e+08	2.14552e+08	4.86052e+08	1.1613e+08	2.61428e+08		1.4497e+08	8.04423e+07	2.6954e+08	1.3018e+07	3.35889e+07	1.35556e+08		0.55489	0.0210474	1.85929	0.164195	3.35073	0.0574297
Q3UEG6	Alanine--glyoxylate aminotransferase 2, mitochondrial OS=Mus musculus GN=Agxt2 PE=1 SV=1 - [AGT2_MOUSE]	513	57.0778	7.92822	1.11601e+08	5.10458e+07	5.93992e+07	6.17434e+07	2.3202e+08	1.93025e+08	3.57945e+08	3.54351e+08	2.37671e+08	1.79426e+08	1.36736e+08	1.34356e+08		7.09473e+07	2.84335e+08	1.72047e+08	2.38057e+07	7.31354e+07	4.19178e+07		4.0077	0.00298404	2.425	0.010932	0.605085	0.0605001
Q9CZN7	Serine hydroxymethyltransferase, mitochondrial OS=Mus musculus OX=10090 GN=Shmt2 PE=1 SV=1 - [GLYM_MOUSE]	504	55.7236	8.47021	1.88333e+08	1.20269e+08	1.98418e+08	1.6284e+08	2.43914e+08	3.78038e+08	3.7659e+08	2.81703e+08	1.42668e+08	2.72534e+08	2.39952e+08	2.24299e+08		1.67465e+08	3.20061e+08	2.19863e+08	3.0176e+07	5.87933e+07	4.78447e+07		1.91121	0.00712339	1.31289	0.159739	0.686942	0.0619847
O35386	Phytanoyl-CoA dioxygenase, peroxisomal OS=Mus musculus GN=Phyh PE=1 SV=1 - [PAHX_MOUSE]	338	38.5825	7.53271	1.50783e+08	6.5766e+07	9.98627e+07	9.70588e+07	2.18624e+08	2.1625e+08	2.28635e+08	241965873	1.96829e+08	2.27779e+08	1.47328e+08	1.41057e+08		1.03368e+08	2.26369e+08	1.78248e+08	3.04719e+07	1.01339e+07	3.58394e+07		2.18994	0.000565751	1.72441	0.0329835	0.787425	0.0665453
Q99MR8	Methylcrotonoyl-CoA carboxylase subunit alpha, mitochondrial OS=Mus musculus GN=Mccc1 PE=1 SV=2 - [MCCA_MOUSE]	717	79.2934	7.82568	1.30011e+06	5.31583e+07	1.30011e+06	2.39401e+07	4.80073e+07	1.0576e+08	6.02573e+07	7.62087e+07	4.38942e+07	5.58445e+07	3.63063e+07	1.30011e+06		1.99246e+07	7.25583e+07	3.43363e+07	2.12976e+07	2.16202e+07	2.03053e+07		3.64164	0.0238868	1.72331	0.428816	0.473223	0.0670797
Q9D2M8	Ubiquitin-conjugating enzyme E2 variant 2 OS=Mus musculus GN=Ube2v2 PE=1 SV=4 - [UB2V2_MOUSE]	145	16.3562	8.08936	866739	866739	866739	3.58724e+07	5.89505e+07	4.2494e+07	130872693	7.58778e+07	5.06495e+07	866739	866739	4.70168e+07		9.61816e+06	7.70487e+07	2.48499e+07	1.51579e+07	3.32414e+07	2.40176e+07		8.01076	0.018675	2.58365	0.388771	0.322522	0.0696596
Q9JK38	Glucosamine 6-phosphate N-acetyltransferase OS=Mus musculus GN=Gnpnat1 PE=1 SV=1 - [GNA1_MOUSE]	184	20.7777	7.69385	866739	4.03756e+07	1.15628e+07	8.16382e+06	4.6186e+07	6.13619e+07	4.55528e+07	5.78941e+07	4.15787e+07	2.49278e+07	866739	4.67581e+07		1.52422e+07	5.27487e+07	2.85328e+07	1.50165e+07	6.99127e+06	1.78939e+07		3.46069	0.00778504	1.87196	0.36246	0.54092	0.0717373
P12970	60S ribosomal protein L7a OS=Mus musculus GN=Rpl7a PE=1 SV=2 - [RL7A_MOUSE]	266	29.958	10.5649	2.23869e+08	2.73359e+08	3.15e+08	2.98741e+08	3.29975e+08	4.30014e+08	3.72049e+08	3.36929e+08	6.39462e+08	5.2255e+08	3.56292e+08	4.85171e+08		2.77742e+08	3.67242e+08	5.00869e+08	3.44624e+07	3.95954e+07	1.01029e+08		1.32224	0.0255087	1.80336	0.0110909	1.36387	0.0768945
Q8C196	Carbamoyl-phosphate synthase [ammonia], mitochondrial OS=Mus musculus GN=Cps1 PE=1 SV=2 - [CPSM_MOUSE]	1500	164.514	6.91748	3.72467e+10	3.6473e+10	4.12973e+10	3.55771e+10	7.05399e+10	6.68764e+10	6.84087e+10	7.3871e+10	4.52721e+10	7.49794e+10	5.20201e+10	4.86798e+10		3.76485e+10	6.9924e+10	5.52379e+10	2.18789e+09	2.62404e+09	1.16448e+10		1.85728	3.31833e-06	1.4672	0.0422638	0.78997	0.0771037
Q8R0Y6	Cytosolic 10-formyltetrahydrofolate dehydrogenase OS=Mus musculus GN=Aldh1l1 PE=1 SV=1 - [AL1L1_MOUSE]	902	98.6465	5.90967	5.99634e+09	4.54921e+09	5.43563e+09	5.33547e+09	1.20689e+10	1.27324e+10	1.47772e+10	1.23901e+10	1.13588e+10	1.22262e+10	1.0768e+10	7.41603e+09		5.32916e+09	1.29921e+10	1.04422e+10	5.15953e+08	1.05698e+09	1.82253e+09		2.43793	2.89664e-05	1.95945	0.00341191	0.803735	0.0808917
P19157	Glutathione S-transferase P 1 OS=Mus musculus GN=Gstp1 PE=1 SV=2 - [GSTP1_MOUSE]	210	23.5941	7.86963	2.35272e+09	2.76946e+09	2.5318e+09	3.02404e+09	1.08171e+10	1.34923e+10	1.02093e+10	7.83221e+09	1.04391e+10	5.40442e+09	5.32705e+09	7.43882e+09		2.66951e+09	1.05877e+10	7.15234e+09	2.52491e+08	2.01401e+09	2.07796e+09		3.96617	0.000512715	2.67928	0.00997765	0.675531	0.0855047
Q91ZJ5	UTP--glucose-1-phosphate uridylyltransferase OS=Mus musculus GN=Ugp2 PE=1 SV=3 - [UGPA_MOUSE]	508	56.9437	7.60596	4.7377e+08	3.70038e+08	3.93065e+08	5.30839e+08	1.82197e+09	1.99597e+09	2.19049e+09	1.72656e+09	1.81799e+09	1.66579e+09	1.06811e+09	1.60964e+09		4.41928e+08	1.93375e+09	1.54038e+09	6.4177e+07	1.76925e+08	2.83123e+08		4.37571	9.2832e-06	3.48559	0.000604043	0.796578	0.0873506
Q91V92	ATP-citrate synthase OS=Mus musculus GN=Acly PE=1 SV=1 - [ACLY_MOUSE]	1091	119.651	7.44482	2.17702e+08	1.84055e+08	2.62821e+08	1.24572e+08	7.10483e+08	9.12158e+08	4.14355e+08	7.20005e+08	1.75971e+08	3.36857e+08	6.7442e+08	3.8461e+08		1.97287e+08	6.8925e+08	3.92965e+08	5.04334e+07	1.77941e+08	1.79945e+08		3.49363	0.00366417	1.99184	0.119678	0.570134	0.0889291
P35505	Fumarylacetoacetase OS=Mus musculus GN=Fah PE=1 SV=2 - [FAAA_MOUSE]	419	46.146	7.18115	1.99462e+09	2.01093e+09	2.24233e+09	2.13069e+09	3.41e+09	3.13236e+09	4.26713e+09	3.94592e+09	2.69493e+09	2.91355e+09	3.6357e+09	2.82288e+09		2.09464e+09	3.68885e+09	3.01677e+09	1.00154e+08	4.43827e+08	3.65686e+08		1.76109	0.000908404	1.44023	0.00560783	0.817806	0.089374
P52760	Ribonuclease UK114 OS=Mus musculus GN=Hrsp12 PE=1 SV=3 - [UK114_MOUSE]	135	14.2465	8.67529	1.45348e+09	1.32313e+09	2.17479e+09	1.35586e+09	2.29167e+09	3.04139e+09	2.65585e+09	2.87954e+09	2.45607e+09	3.85488e+09	3.71023e+09	3.87119e+09		1.57681e+09	2.71711e+09	3.47309e+09	3.48554e+08	2.81201e+08	5.90511e+08		1.72317	0.0045186	2.2026	0.00303198	1.27823	0.0921726
Q9D8E6	60S ribosomal protein L4 OS=Mus musculus GN=Rpl4 PE=1 SV=3 - [RL4_MOUSE]	419	47.124	11.0044	3.95828e+08	1.37262e+08	1.53061e+08	1.71302e+08	8.08105e+08	5.84513e+08	7.23865e+08	6.73387e+08	5.46017e+08	7.12797e+08	4.84942e+08	4.34385e+08		2.14363e+08	6.97467e+08	5.44535e+08	1.05459e+08	8.10493e+07	1.0488e+08		3.25367	0.000751139	2.54024	0.00850937	0.780732	0.0926276
Q91WT9	Cystathionine beta-synthase OS=Mus musculus GN=Cbs PE=1 SV=3 - [CBS_MOUSE]	561	61.5042	6.48096	1.21646e+08	2.43522e+08	3.14753e+08	2.27308e+08	5.03834e+08	5.94437e+08	5.01263e+08	5.50278e+08	1.2784e+08	5.91667e+08	3.6445e+08	2.75008e+08		2.26807e+08	5.37453e+08	3.39741e+08	6.90526e+07	3.8248e+07	1.68204e+08		2.36965	0.000489078	1.49793	0.323363	0.632132	0.0943375
Q99P30	Peroxisomal coenzyme A diphosphatase NUDT7 OS=Mus musculus GN=Nudt7 PE=1 SV=2 - [NUDT7_MOUSE]	236	26.8398	6.34131	6.63944e+08	3.6493e+08	5.37574e+08	4.7666e+08	9.33762e+08	1.05264e+09	1.03401e+09	1.0746e+09	8.98966e+08	4.04771e+08	8.19122e+08	9.59451e+08		5.10777e+08	1.02375e+09	7.70577e+08	1.07951e+08	5.39064e+07	2.16984e+08		2.0043	0.000321346	1.50864	0.112732	0.752699	0.0975163
P02088	Hemoglobin subunit beta-1 OS=Mus musculus GN=Hbb-b1 PE=1 SV=2 - [HBB1_MOUSE]	147	15.8301	7.6499	3.17641e+09	3.12989e+09	7.48401e+09	2.25371e+09	1.06058e+10	1.24751e+10	1.78782e+10	6.04811e+09	4.93309e+09	8.2291e+09	5.65837e+09	8.00857e+09		4.01101e+09	1.17518e+10	6.70728e+09	2.03855e+09	4.23973e+09	1.43677e+09		2.92989	0.0291815	1.67222	0.11029	0.570746	0.0988122
P14206	40S ribosomal protein SA OS=Mus musculus GN=Rpsa PE=1 SV=4 - [RSSA_MOUSE]	295	32.8174	4.86865	1.47422e+08	2.92324e+08	2.25458e+08	3.8549e+08	5.28932e+08	3.12336e+08	5.22079e+08	5.31369e+08	1.78811e+08	3.01234e+08	2.57994e+08	4.91859e+08		2.62674e+08	4.73679e+08	3.07474e+08	8.75086e+07	9.32138e+07	1.15151e+08		1.8033	0.0288578	1.17056	0.610894	0.64912	0.100008
O08756	3-hydroxyacyl-CoA dehydrogenase type-2 OS=Mus musculus GN=Hsd17b10 PE=1 SV=4 - [HCD2_MOUSE]	261	27.4016	8.41162	6.54578e+08	5.64602e+08	6.7106e+08	7.96619e+08	1.12095e+09	1.43939e+09	1.74107e+09	1.25521e+09	1.4116e+09	9.33611e+08	8.01555e+08	9.48031e+08		6.71715e+08	1.38916e+09	1.0237e+09	8.27168e+07	2.32511e+08	2.31115e+08		2.06807	0.00236779	1.52401	0.0475724	0.736921	0.101728
Q9DC69	NADH dehydrogenase [ubiquinone] 1 alpha subcomplex subunit 9, mitochondrial OS=Mus musculus GN=Ndufa9 PE=1 SV=2 - [NDUA9_MOUSE]	377	42.4984	9.74463	2.16685e+06	2.16685e+06	2.16685e+06	2.16685e+06	8.38381e+07	8.18588e+07	9.59915e+07	1.89176e+08	2.16685e+06	7.60923e+07	9.57933e+07	1.03966e+07		2.16685e+06	1.12716e+08	4.61123e+07	0	4.44747e+07	4.05396e+07		52.0185	0.00506333	21.2808	0.109524	0.409101	0.103699
P47738	Aldehyde dehydrogenase, mitochondrial OS=Mus musculus GN=Aldh2 PE=1 SV=1 - [ALDH2_MOUSE]	519	56.5018	7.62061	3.44126e+09	2.27902e+09	2.30435e+09	3.32596e+09	6.8943e+09	6.34676e+09	8.73797e+09	4.86018e+09	3.9868e+09	5.0021e+09	5.12023e+09	5.94436e+09		2.83765e+09	6.7098e+09	5.01337e+09	5.47556e+08	1.38748e+09	6.95007e+08		2.36456	0.00412013	1.76673	0.00532614	0.747171	0.107137
Q9CPU0	Lactoylglutathione lyase OS=Mus musculus GN=Glo1 PE=1 SV=3 - [LGUL_MOUSE]	184	20.7964	5.46533	7.3976e+08	5.01648e+08	5.75398e+08	3.88804e+08	7.9293e+08	1.27142e+09	1.26159e+09	9.20725e+08	7.52282e+08	4.71215e+08	7.10692e+08	1.05094e+09		5.51402e+08	1.06167e+09	7.46281e+08	1.27444e+08	2.09792e+08	2.06021e+08		1.92539	0.0113599	1.35342	0.212946	0.702933	0.112565
Q8VDK1	Nitrilase homolog 1 OS=Mus musculus GN=Nit1 PE=1 SV=2 - [NIT1_MOUSE]	323	35.682	7.94287	2.77104e+07	1.62298e+07	866739	866739	1.33497e+08	1.1714e+08	6.96086e+07	4.7372e+07	5.82428e+07	4.71693e+07	5.85808e+07	5.53627e+07		1.14184e+07	9.19042e+07	5.48389e+07	1.13055e+07	3.48101e+07	4.60127e+06		8.04876	0.00887504	4.80267	0.000838711	0.596696	0.117255
P47911	60S ribosomal protein L6 OS=Mus musculus GN=Rpl6 PE=1 SV=3 - [RL6_MOUSE]	296	33.4889	10.6968	3.28232e+08	4.29579e+08	4.69942e+08	5.25366e+08	8.12001e+08	6.12785e+08	8.32508e+08	8.5535e+08	5.69689e+08	6.8841e+08	5.95737e+08	7.56442e+08		4.3828e+08	7.78161e+08	6.52569e+08	7.20637e+07	9.67032e+07	7.44532e+07		1.77549	0.00276258	1.48893	0.0116144	0.838605	0.124961
P11352	Glutathione peroxidase 1 OS=Mus musculus GN=Gpx1 PE=1 SV=2 - [GPX1_MOUSE]	201	22.3162	7.21045	2.61714e+09	1.67151e+09	2.13162e+09	1.58065e+09	3.21408e+09	3.00792e+09	3.71141e+09	2.46988e+09	2.59978e+09	2.86973e+09	1.3416e+09	2.59621e+09		2.00023e+09	3.10082e+09	2.35183e+09	4.12899e+08	4.45076e+08	5.93717e+08		1.55023	0.0200692	1.17578	0.432008	0.758453	0.130993
Q9JMH6	Thioredoxin reductase 1, cytoplasmic OS=Mus musculus GN=Txnrd1 PE=1 SV=3 - [TRXR1_MOUSE]	613	67.042	7.44482	2.57506e+07	3.32212e+07	5.6203e+07	3.76696e+07	5.35366e+07	9.28682e+07	102813114	8.89813e+07	243657074	8.37275e+07	1.07997e+08	1.57203e+08		3.82111e+07	8.45498e+07	1.48146e+08	1.12268e+07	1.86024e+07	6.1168e+07		2.2127	0.0101609	3.87704	0.0221737	1.75217	0.135681
P26150	3 beta-hydroxysteroid dehydrogenase/Delta 5-->4-isomerase type 3 OS=Mus musculus GN=Hsd3b3 PE=1 SV=3 - [3BHS3_MOUSE]	373	42.0047	7.97217	1.18559e+08	4.51135e+07	9.79742e+07	5.53683e+07	3.75596e+08	2.37844e+08	3.45457e+08	4.12034e+08	3.97898e+08	1.35054e+08	1.48416e+08	2.0321e+08		7.92538e+07	3.42733e+08	2.21144e+08	3.01307e+07	6.49843e+07	1.05195e+08		4.3245	0.000702402	2.79033	0.0658087	0.645239	0.139425
Q91XE0	Glycine N-acyltransferase OS=Mus musculus GN=Glyat PE=1 SV=1 - [GLYAT_MOUSE]	296	34.076	8.27979	6.54281e+08	2.38867e+08	3.05843e+08	2.79091e+08	7.57703e+08	6.37831e+08	1.05537e+09	7.42127e+08	6.71061e+08	4.9062e+08	4.85627e+08	7.70485e+08		3.69521e+08	7.98258e+08	6.04448e+08	1.66126e+08	1.55434e+08	1.21533e+08		2.16025	0.0171603	1.63576	0.0954387	0.757209	0.139778
Q9DBM2	Peroxisomal bifunctional enzyme OS=Mus musculus GN=Ehhadh PE=1 SV=4 - [ECHP_MOUSE]	718	78.252	9.12939	1.0742e+09	8.03499e+08	1.0723e+09	9.84481e+08	1.86347e+09	2.03858e+09	2.48336e+09	1.30748e+09	2.14726e+09	2.45907e+09	2.21659e+09	3.277e+09		9.8362e+08	1.92322e+09	2.52498e+09	1.10129e+08	4.21241e+08	4.4935e+08		1.95525	0.00964742	2.56703	0.00118237	1.31289	0.141552
Q921H8	3-ketoacyl-CoA thiolase A, peroxisomal OS=Mus musculus GN=Acaa1a PE=1 SV=1 - [THIKA_MOUSE]	424	43.9257	8.44092	5.53459e+07	8.9779e+07	9.36387e+07	1.1349e+08	1.79958e+08	1.9374e+08	2.38085e+08	2.04922e+08	1.87534e+08	2.09422e+08	9.5915e+07	1.29147e+08		8.80635e+07	2.04176e+08	1.55504e+08	2.09224e+07	2.14811e+07	4.5218e+07		2.31851	0.000533628	1.76582	0.0574903	0.761619	0.143169
O35660	Glutathione S-transferase Mu 6 OS=Mus musculus GN=Gstm6 PE=1 SV=4 - [GSTM6_MOUSE]	218	25.6049	6.23975	3.06889e+07	4.2502e+07	1.13869e+08	7.37695e+07	1.91539e+08	2.76717e+08	2.63374e+08	1.1277e+08	1.89198e+08	7.82161e+07	9.69786e+07	1.68646e+08		6.52074e+07	2.111e+08	1.3326e+08	3.22038e+07	6.53635e+07	4.67103e+07		3.23736	0.0133377	2.04363	0.0830181	0.631263	0.144317
Q91X72	Hemopexin OS=Mus musculus GN=Hpx PE=1 SV=2 - [HEMO_MOUSE]	460	51.2852	7.79639	2.60022e+06	2.60022e+06	5.32039e+07	2.60022e+06	2.41228e+08	1.77696e+08	2.88312e+08	6.01152e+07	2.6496e+08	5.43983e+08	2.62744e+08	2.66739e+08		1.52511e+07	1.91838e+08	3.34606e+08	2.1912e+07	8.55827e+07	1.20892e+08		12.5786	0.013432	21.9398	0.00409463	1.74421	0.146061
Q8VC12	Urocanate hydratase OS=Mus musculus GN=Uroc1 PE=1 SV=2 - [HUTU_MOUSE]	676	74.5426	7.53271	1.05537e+09	8.77577e+08	1.12915e+09	8.70315e+08	1.56137e+09	1.65427e+09	1.74992e+09	1.55894e+09	1.24182e+09	1.82259e+09	1.27426e+09	1.04613e+09		9.83102e+08	1.63113e+09	1.3462e+09	1.12259e+08	7.86206e+07	2.88557e+08		1.65916	0.000178619	1.36934	0.0885194	0.825319	0.150012
Q6XVG2	Cytochrome P450 2C54 OS=Mus musculus GN=Cyp2c54 PE=1 SV=1 - [CP254_MOUSE]	490	55.8218	7.47412	9.61964e+07	7.92285e+07	1.22495e+08	2.25931e+08	8.08335e+06	3.03359e+06	3.03359e+06	3.03359e+06	1.89796e+08	3.03359e+06	3.03359e+06	2.91944e+08		1.30963e+08	4.29603e+06	1.21952e+08	5.69557e+07	2.18661e+06	1.24281e+08		0.0328035	0.00846824	0.931197	0.912835	28.3871	0.152229
P70296	Phosphatidylethanolamine-binding protein 1 OS=Mus musculus GN=Pebp1 PE=1 SV=3 - [PEBP1_MOUSE]	187	20.8173	5.40186	1.90069e+08	1.42646e+08	3.00902e+08	1.4712e+08	5.34768e+08	5.0899e+08	5.82228e+08	4.76571e+08	4.60241e+08	5.13583e+08	1.33984e+08	4.2012e+08		1.95184e+08	5.25639e+08	3.81982e+08	6.37826e+07	3.86346e+07	1.4697e+08		2.69304	0.000255851	1.95703	0.0899692	0.7267	0.152665
P50136	2-oxoisovalerate dehydrogenase subunit alpha, mitochondrial OS=Mus musculus GN=Bckdha PE=1 SV=1 - [ODBA_MOUSE]	442	50.3391	8.06006	1.73348e+06	1.73348e+06	1.73348e+06	1.73348e+06	1.43058e+08	8.03405e+07	7.53859e+06	5.5864e+07	6.63223e+06	6.19958e+07	5.82071e+06	6.58015e+06		1.73348e+06	7.17002e+07	2.02572e+07	0	4.88212e+07	2.40999e+07		41.362	0.0476606	11.6859	0.23144	0.282527	0.152844
Q9QXD6	Fructose-1,6-bisphosphatase 1 OS=Mus musculus GN=Fbp1 PE=1 SV=3 - [F16P1_MOUSE]	338	36.8888	6.56592	2.38199e+09	1.49318e+09	1.87138e+09	1592978620	4.18204e+09	5.13764e+09	4.32741e+09	5.12086e+09	3.36582e+09	4.5615e+09	4.09675e+09	4.36235e+09		1.83488e+09	4.69199e+09	4.0966e+09	3.44943e+08	4.40313e+08	4.5299e+08		2.5571	0.00011592	2.23262	0.00046498	0.873106	0.153713
Q60759	Glutaryl-CoA dehydrogenase, mitochondrial OS=Mus musculus GN=Gcdh PE=1 SV=2 - [GCDH_MOUSE]	438	48.5749	8.73389	4.59093e+08	1.87795e+08	1.94782e+08	8.50883e+07	5.81387e+08	6.22893e+08	8.22645e+08	6.7908e+08	6.71059e+08	6.01462e+08	5.23124e+08	4.41806e+08		2.3169e+08	6.76501e+08	5.59363e+08	1.38287e+08	9.12214e+07	8.57048e+07		2.91986	0.00350156	2.41428	0.0130075	0.826847	0.156154
Q9D6Y7	Mitochondrial peptide methionine sulfoxide reductase OS=Mus musculus GN=Msra PE=1 SV=1 - [MSRA_MOUSE]	233	25.9718	8.41162	9.37951e+07	4.77709e+07	9.35227e+07	7.44019e+07	1.27564e+08	1.24536e+08	2.78055e+08	1.61111e+08	1.38487e+08	1.10912e+08	3.94583e+07	1.32525e+08		7.73727e+07	1.72817e+08	1.05346e+08	1.88123e+07	6.2432e+07	3.93993e+07		2.23356	0.0443611	1.36154	0.309602	0.609581	0.164514
Q8VCR7	Protein ABHD14B OS=Mus musculus GN=Abhd14b PE=1 SV=1 - [ABHEB_MOUSE]	210	22.4366	6.26514	3.39893e+08	2.23404e+08	4.91732e+08	2.34633e+08	9.33607e+08	1.00798e+09	7.51871e+08	8.65351e+08	9.18981e+08	8.04113e+08	6.21627e+08	6.62382e+08		3.22415e+08	8.89702e+08	7.51776e+08	1.07799e+08	9.42178e+07	1.17927e+08		2.75949	0.000471344	2.3317	0.00348703	0.844974	0.164579
Q920A5	Retinoid-inducible serine carboxypeptidase OS=Mus musculus GN=Scpep1 PE=1 SV=2 - [RISC_MOUSE]	452	50.9318	5.65576	866739	866739	866739	866739	1.37558e+08	7.71857e+07	9.70547e+07	866739	8.55849e+07	866739	866739	866739		866739	7.81663e+07	2.20463e+07	0	4.96497e+07	3.6684e+07		90.1844	0.0357358	25.4359	0.355918	0.282043	0.166416
Q9D0R2	Threonine--tRNA ligase, cytoplasmic OS=Mus musculus GN=Tars PE=1 SV=2 - [SYTC_MOUSE]	722	83.3029	7.35693	1.9298e+08	1.23742e+08	1.69063e+08	8.11498e+07	5.08893e+08	3.80803e+08	5.72075e+08	5.75226e+08	4.15942e+08	4.79322e+08	6.37044e+07	4.1781e+08		1.41734e+08	5.09249e+08	3.44194e+08	4.2916e+07	7.87378e+07	1.63937e+08		3.593	0.00039251	2.42846	0.083964	0.675886	0.16702
Q9QXX4	Calcium-binding mitochondrial carrier protein Aralar2 OS=Mus musculus GN=Slc25a13 PE=1 SV=1 - [CMC2_MOUSE]	676	74.4198	8.60205	5.25571e+08	5.87056e+08	5.99897e+08	5.82557e+08	6.48767e+08	8.89097e+08	8.42258e+08	8.55317e+08	6.96322e+08	8.69478e+08	5.28799e+08	5.75046e+08		5.7377e+08	8.0886e+08	6.67411e+08	2.85457e+07	9.39966e+07	1.3173e+08		1.40973	0.00604469	1.1632	0.274176	0.825126	0.180814
O70251	Elongation factor 1-beta OS=Mus musculus GN=Eef1b PE=1 SV=5 - [EF1B_MOUSE]	225	24.6782	4.69092	1.4639e+08	1.31779e+08	7.5893e+07	5.6218e+07	3.07667e+08	270330233	3.09684e+08	1.82466e+08	2.75334e+08	1.66385e+08	1.45308e+08	2.28905e+08		1.0257e+08	2.67537e+08	2.03983e+08	3.75285e+07	5.15553e+07	5.14015e+07		2.60833	0.00418883	1.98872	0.0328567	0.762448	0.181282
Q9CY27	Very-long-chain enoyl-CoA reductase OS=Mus musculus GN=Tecr PE=1 SV=1 - [TECR_MOUSE]	308	36.0668	9.5542	5.64e+07	5.46948e+07	866739	2.35513e+07	84798538	7.23136e+07	8.18801e+07	7.92459e+07	77260121	6.84376e+07	3.16899e+07	7.56816e+07		3.38782e+07	7.95596e+07	6.32673e+07	2.31136e+07	4.62152e+06	1.85323e+07		2.3484	0.0152911	1.86749	0.136561	0.795219	0.190025
P24369	Peptidyl-prolyl cis-trans isomerase B OS=Mus musculus GN=Ppib PE=1 SV=2 - [PPIB_MOUSE]	216	23.6986	9.5542	2.69628e+08	1.14135e+08	7.89326e+07	1.41996e+08	2.40187e+08	3.32301e+08	3.08393e+08	3.99113e+08	1.86189e+08	3.10522e+08	3.09176e+08	1.90649e+08		1.51173e+08	3.19999e+08	2.49134e+08	7.19483e+07	5.6822e+07	6.07373e+07		2.11677	0.0188483	1.64801	0.121611	0.778548	0.190471
Q9WVA4	Transgelin-2 OS=Mus musculus GN=Tagln2 PE=1 SV=4 - [TAGL2_MOUSE]	199	22.3812	8.23584	7.42429e+06	1.30011e+06	1.7651e+07	1.18345e+07	2.83007e+07	2.88918e+07	1.36339e+07	2.33344e+07	2.57743e+07	5.98324e+07	2.06791e+07	4.49251e+07		9.55247e+06	2.35402e+07	3.78027e+07	5.988e+06	6.11308e+06	1.5604e+07		2.4643	0.0299093	3.95737	0.0263683	1.60588	0.190902
Q9DCD0	6-phosphogluconate dehydrogenase, decarboxylating OS=Mus musculus GN=Pgd PE=1 SV=3 - [6PGD_MOUSE]	483	53.2131	7.2251	1.16189e+07	8.94685e+06	8.01417e+07	3.1256e+07	1.91717e+08	2.33297e+08	1.83567e+08	1.65319e+08	2.64474e+08	5.85674e+07	7.50899e+07	8.51314e+07		3.29908e+07	1.93475e+08	1.20816e+08	2.8553e+07	2.48991e+07	8.34818e+07		5.8645	0.000327713	3.6621	0.135454	0.624451	0.198686
Q91WG0	Acylcarnitine hydrolase OS=Mus musculus GN=Ces2c PE=1 SV=1 - [EST2C_MOUSE]	561	62.429	5.69385	866739	6.73272e+07	7.80745e+07	7.14944e+07	866739	866739	866739	866739	5.45237e+07	866739	866739	1.52466e+08		5.44407e+07	866739	5.21808e+07	3.11674e+07	0	6.19049e+07		0.0159208	0.0247246	0.958488	0.956796	60.2035	0.201094
Q99J99	3-mercaptopyruvate sulfurtransferase OS=Mus musculus OX=10090 GN=Mpst PE=1 SV=4 - [THTM_MOUSE]	297	33.0765	6.46826	1.26846e+08	1.33759e+08	1.63906e+08	1.08898e+08	2.68696e+08	3.76164e+08	3.99984e+08	2.51907e+08	2.14607e+08	3.08679e+08	1.84927e+08	3.11345e+08		1.33352e+08	3.24188e+08	2.5489e+08	1.98369e+07	6.47118e+07	5.61204e+07		2.43106	0.00275636	1.9114	0.0122694	0.786241	0.210682
Q9WVL0	Maleylacetoacetate isomerase OS=Mus musculus GN=Gstz1 PE=1 SV=1 - [MAAI_MOUSE]	216	24.2598	7.85498	9.69077e+08	1.3234e+09	1.66777e+09	1.44247e+09	2.20057e+09	2.29494e+09	2.15784e+09	1.80225e+09	1.49414e+09	2.1689e+09	1.84783e+09	1.95991e+09		1.35068e+09	2.1139e+09	1.8677e+09	2.52655e+08	1.86647e+08	2.44523e+08		1.56506	0.00563325	1.38278	0.043673	0.883531	0.214988
Q6IFX2	Keratin, type I cytoskeletal 42 OS=Mus musculus GN=Krt42 PE=1 SV=1 - [K1C42_MOUSE]	452	50.1019	5.16064	1.30011e+06	1.45375e+07	1.6757e+07	2.14004e+07	1.1138e+08	8.36332e+07	9.00933e+07	9.46087e+07	2.73602e+07	2.96464e+07	1.77671e+07	142498668		1.34988e+07	9.49288e+07	5.43181e+07	7.46555e+06	1.02678e+07	5.11058e+07		7.03241	3.16873e-05	4.02393	0.220064	0.572199	0.225901
Q61176	Arginase-1 OS=Mus musculus GN=Arg1 PE=1 SV=1 - [ARGI1_MOUSE]	323	34.7862	7.00537	3.51359e+09	2.9688e+09	3.77275e+09	3.42782e+09	7.90126e+09	7.99337e+09	7.79824e+09	9.59845e+09	4.67965e+09	1.01228e+10	6.2142e+09	5.43651e+09		3.42074e+09	8.32283e+09	6.6133e+09	2.90187e+08	7.39705e+08	2.09761e+09		2.43305	3.96355e-05	1.9333	0.0400502	0.794597	0.231452
Q9JLJ2	4-trimethylaminobutyraldehyde dehydrogenase OS=Mus musculus GN=Aldh9a1 PE=1 SV=1 - [AL9A1_MOUSE]	494	53.4801	6.97607	1.46004e+08	9.2399e+07	2.6584e+08	1.22702e+08	3.7762e+08	5.94701e+08	3.09819e+08	2.45684e+08	3.02521e+08	1.57583e+08	4.28952e+08	4.72944e+07		1.56736e+08	3.81956e+08	2.34088e+08	6.57958e+07	1.3139e+08	1.44395e+08		2.43694	0.0377899	1.49351	0.430859	0.612866	0.237513
Q99KB8	Hydroxyacylglutathione hydrolase, mitochondrial OS=Mus musculus GN=Hagh PE=1 SV=2 - [GLO2_MOUSE]	309	34.0625	7.75244	8.80366e+07	8.25311e+07	1.08277e+08	104800044	2.25778e+08	2.07052e+08	2.44555e+08	2.17664e+08	2.73091e+08	2.34769e+08	866739	866739		9.59111e+07	2.23762e+08	1.27398e+08	1.08738e+07	1.37191e+07	1.27255e+08		2.33302	1.49559e-05	1.3283	0.684267	0.569347	0.240011
Q9CXZ1	NADH dehydrogenase [ubiquinone] iron-sulfur protein 4, mitochondrial OS=Mus musculus GN=Ndufs4 PE=1 SV=3 - [NDUS4_MOUSE]	175	19.7722	9.99365	8.29322e+07	3.00134e+07	3.76589e+07	866739	1.21882e+08	1.23825e+08	2.0774e+08	1.9148e+08	1.32888e+08	2.01183e+08	866739	5.16319e+07		3.78678e+07	1.61232e+08	9.66423e+07	2.94178e+07	3.88127e+07	7.65528e+07		4.25775	0.00463096	2.5521	0.260818	0.599399	0.240208
P11679	Keratin, type II cytoskeletal 8 OS=Mus musculus GN=Krt8 PE=1 SV=4 - [K2C8_MOUSE]	490	54.5315	5.8208	6.73369e+08	1.67392e+09	1.9031e+09	2.64203e+09	3.85874e+09	4.59721e+09	2.20611e+09	3.16472e+09	3.30422e+09	5.38714e+09	3.773e+09	4.94608e+09		1.72311e+09	3.4567e+09	4.35261e+09	7.03772e+08	8.81988e+08	8.45212e+08		2.00608	0.0374697	2.52603	0.0060722	1.25918	0.251017
P61922	4-aminobutyrate aminotransferase, mitochondrial OS=Mus musculus GN=Abat PE=1 SV=1 - [GABT_MOUSE]	500	56.4156	8.08936	6.73858e+08	7.60946e+08	8.51323e+08	6.55959e+08	1.24208e+09	1.10197e+09	1.59416e+09	1.76553e+09	9.79626e+08	1.53355e+09	9.70087e+08	1.19587e+09		7.35521e+08	1.42594e+09	1.16978e+09	7.77639e+07	2.65697e+08	2.28607e+08		1.93867	0.00498525	1.59041	0.0207188	0.820361	0.252515
Q07417	Short-chain specific acyl-CoA dehydrogenase, mitochondrial OS=Mus musculus GN=Acads PE=1 SV=2 - [ACADS_MOUSE]	412	44.8611	8.47021	6.09714e+08	7.19393e+08	5.57591e+08	6.53574e+08	1.23913e+09	6.70066e+08	1.03284e+09	9.2088e+08	7.90224e+08	8.71309e+08	2.84231e+08	9.49841e+08		6.35068e+08	9.6573e+08	7.23901e+08	5.93689e+07	2.05354e+08	2.60042e+08		1.52067	0.0365731	1.13988	0.58502	0.749589	0.253079
Q8BGL3	Sulfotransferase 2A8 OS=Mus musculus OX=10090 GN=Sult2a8 PE=1 SV=1 - [ST2A8_MOUSE]	282	33.2741	7.02002	1.78049e+09	1.1103e+09	1.26838e+09	9.03597e+08	2.85592e+08	3.5424e+08	4.14573e+08	7.09877e+07	1.72096e+08	1.59382e+07	2.40001e+08	2.35448e+08		1.26569e+09	2.81348e+08	1.65871e+08	3.24148e+08	1.29742e+08	9.06295e+07		0.222288	0.00275752	0.131051	0.0013073	0.589557	0.253178
Q9QUM9	Proteasome subunit alpha type-6 OS=Mus musculus GN=Psma6 PE=1 SV=1 - [PSA6_MOUSE]	246	27.3548	6.75635	866739	2.02981e+07	1.9058e+07	2.07436e+07	1.36002e+08	1.42119e+08	1.68566e+08	1.09592e+08	1.29817e+08	1.49331e+08	9.20435e+07	8.90355e+07		1.52416e+07	1.3907e+08	1.15057e+08	8.32228e+06	2.09621e+07	2.54917e+07		9.12435	7.70971e-05	7.54886	0.000659365	0.827331	0.254385
Q76MZ3	Serine/threonine-protein phosphatase 2A 65 kDa regulatory subunit A alpha isoform OS=Mus musculus GN=Ppp2r1a PE=1 SV=3 - [2AAA_MOUSE]	589	65.2809	5.10986	2.76631e+07	3.58174e+07	2.26888e+07	2.46207e+07	9.54452e+07	7.85059e+07	5.89757e+07	8.72196e+07	8.32066e+07	8.74987e+07	9.01938e+07	1.05516e+08		2.76975e+07	8.00366e+07	9.16037e+07	5.01219e+06	1.35548e+07	8.40985e+06		2.88967	0.000762828	3.30729	2.86485e-05	1.14452	0.255818
P06745	Glucose-6-phosphate isomerase OS=Mus musculus GN=Gpi PE=1 SV=4 - [G6PI_MOUSE]	558	62.7272	8.1333	2.27238e+08	6.825e+07	1.41854e+08	1.04545e+08	3.79606e+08	4.13601e+08	4.33214e+08	2.57217e+08	3.9314e+08	3.84082e+08	9.99876e+07	1.96855e+08		1.35472e+08	3.70909e+08	2.68516e+08	5.90276e+07	6.8385e+07	1.24924e+08		2.73791	0.00404282	1.98208	0.146394	0.72394	0.25945
O88685	26S protease regulatory subunit 6A OS=Mus musculus GN=Psmc3 PE=1 SV=2 - [PRS6A_MOUSE]	442	49.5176	5.18604	866739	4.81697e+07	2.63602e+07	4.07096e+07	6.26268e+07	5.20926e+07	7.41e+07	6.82605e+07	5.0519e+07	5.26316e+07	866739	7.31668e+07		2.90266e+07	6.427e+07	4.4296e+07	1.80488e+07	8.11697e+06	2.65887e+07		2.21418	0.0215373	1.52605	0.441988	0.689218	0.259739
Q9D0F9	Phosphoglucomutase-1 OS=Mus musculus GN=Pgm1 PE=1 SV=4 - [PGM1_MOUSE]	562	61.3796	6.56592	5.74892e+08	9.22751e+08	1138225451	1.21554e+09	1.83573e+09	2.15914e+09	2.33098e+09	1.70486e+09	1.73965e+09	2.1015e+09	1.37931e+09	1.78333e+09		9.62853e+08	2.00768e+09	1.75095e+09	2.4836e+08	2.49364e+08	2.56015e+08		2.08513	0.00213191	1.8185	0.00869027	0.872126	0.259818
P34884	Macrophage migration inhibitory factor OS=Mus musculus GN=Mif PE=1 SV=2 - [MIF_MOUSE]	115	12.4962	7.34229	1.74286e+08	4.09382e+08	4.48097e+08	3.52949e+08	1.0641e+09	1.07278e+09	1.05559e+09	1.35737e+09	1.03507e+09	1.30299e+09	6.62767e+08	7.33549e+08		3.46179e+08	1.13746e+09	9.33595e+08	1.04851e+08	1.27108e+08	2.55009e+08		3.28576	0.000163819	2.69686	0.010208	0.820772	0.261524
P17047	Lysosome-associated membrane glycoprotein 2 OS=Mus musculus GN=Lamp2 PE=1 SV=2 - [LAMP2_MOUSE]	415	45.652	7.38623	8.1698e+07	4.17617e+07	5.7866e+07	5.06563e+07	132330685	1.34799e+08	1.68503e+08	9.27831e+07	1.42085e+08	1.39252e+08	1.54828e+08	1.82555e+08		5.79955e+07	1.32104e+08	1.5468e+08	1.48259e+07	2.6825e+07	1.71296e+07		2.27783	0.00576205	2.6671	0.000314636	1.17089	0.265232
G3X982	Aldehyde oxidase 3 OS=Mus musculus GN=Aox3 PE=1 SV=1 - [AOXC_MOUSE]	1335	146.807	6.45557	5.9645e+08	6.72408e+08	5.55522e+08	5.60402e+08	2.79742e+08	3.39436e+08	2.53484e+08	1.74886e+08	2.49346e+08	6.53693e+07	1.62626e+08	2.82462e+08		5.96196e+08	2.61887e+08	1.89951e+08	4.67545e+07	5.91027e+07	8.41923e+07		0.439263	0.000254342	0.318605	0.000335329	0.725317	0.271338
P25444	40S ribosomal protein S2 OS=Mus musculus GN=Rps2 PE=1 SV=3 - [RS2_MOUSE]	293	31.2117	10.2427	2.23881e+08	1.7706e+08	1.89129e+08	1.81041e+08	5.25145e+08	4.6988e+08	5.87839e+08	4.96891e+08	3.82056e+08	6.28864e+08	3.46595e+08	3.84359e+08		1.92778e+08	5.19939e+08	4.35469e+08	1.84766e+07	4.38025e+07	1.12656e+08		2.69709	2.11125e-05	2.25891	0.0103048	0.837538	0.271628
Q99LB2	Dehydrogenase/reductase SDR family member 4 OS=Mus musculus GN=Dhrs4 PE=1 SV=3 - [DHRS4_MOUSE]	279	29.8657	9.37842	2.74961e+08	1.89936e+08	1.04898e+08	2.01663e+08	3.88581e+08	4.25311e+08	3.95059e+08	3.45896e+08	3.70037e+08	5.54277e+08	4.31235e+08	4.05185e+08		1.92864e+08	3.88712e+08	4.40184e+08	6.03406e+07	2.83418e+07	6.93589e+07		2.01547	0.00224694	2.28235	0.00346883	1.13242	0.27904
Q9D051	Pyruvate dehydrogenase E1 component subunit beta, mitochondrial OS=Mus musculus GN=Pdhb PE=1 SV=1 - [ODPB_MOUSE]	359	38.912	6.87354	1.00083e+08	1.28589e+08	1.44448e+08	1.27129e+08	2.65982e+08	3.2263e+08	1.22301e+08	3.37153e+08	8.52414e+07	3.02412e+08	1.73541e+08	1.79253e+08		1.25062e+08	2.62017e+08	1.85112e+08	1.5941e+07	8.49347e+07	7.73009e+07		2.09509	0.0335152	1.48016	0.235655	0.706489	0.290172
Q9JKR6	Hypoxia up-regulated protein 1 OS=Mus musculus GN=Hyou1 PE=1 SV=1 - [HYOU1_MOUSE]	999	111.112	5.18604	1.47883e+08	2.24722e+08	2.11241e+08	1.99696e+08	8.8356e+07	3.99445e+07	7.15068e+07	9.02629e+07	4.14704e+07	2.16685e+06	4.29035e+07	9.77209e+07		1.95886e+08	7.25175e+07	4.60654e+07	2.90952e+07	2.01729e+07	3.40092e+07		0.370203	0.000935194	0.235165	0.00115356	0.635231	0.290616
Q5RKZ7	Molybdenum cofactor biosynthesis protein 1 OS=Mus musculus GN=Mocs1 PE=1 SV=2 - [MOCS1_MOUSE]	636	69.8144	9.14404	866739	866739	866739	866739	866739	4.68298e+06	6.64509e+06	5.38788e+06	866739	866739	866739	6.40031e+06		866739	4.39567e+06	2.25013e+06	0	2.15524e+06	2.39611e+06		5.0715	0.0297222	2.59609	0.355918	0.511897	0.29273
Q922D8	C-1-tetrahydrofolate synthase, cytoplasmic OS=Mus musculus GN=Mthfd1 PE=1 SV=4 - [C1TC_MOUSE]	935	101.136	7.13721	7.43397e+08	5.39713e+08	7.09208e+08	4.39391e+08	1.33199e+09	1.20151e+09	1.42088e+09	8.52655e+08	8.62805e+08	1.20515e+09	1.15826e+09	8.92761e+08		6.07927e+08	1.20176e+09	1.02974e+09	1.24164e+08	2.1613e+08	1.5323e+08		1.97681	0.00617142	1.69386	0.0100345	0.856865	0.303742
P50247	Adenosylhomocysteinase OS=Mus musculus GN=Ahcy PE=1 SV=3 - [SAHH_MOUSE]	432	47.6573	6.53662	1.65878e+09	1.2821e+09	1.85681e+09	1.36569e+09	3.07435e+09	2.3236e+09	2.92122e+09	3.4585e+09	2.17986e+09	3.10426e+09	2.42492e+09	2.68635e+09		1.54084e+09	2.94442e+09	2.59885e+09	2.29878e+08	4.08384e+08	3.42383e+08		1.91091	0.00203943	1.68664	0.00435902	0.882636	0.304299
Q9DCT2	NADH dehydrogenase [ubiquinone] iron-sulfur protein 3, mitochondrial OS=Mus musculus GN=Ndufs3 PE=1 SV=2 - [NDUS3_MOUSE]	263	30.1305	7.1665	3.68083e+07	3.45783e+07	9.27321e+07	1.73348e+06	1.75534e+08	2.24162e+08	2.51581e+08	2.78199e+08	1.99317e+08	2.53268e+08	9.87901e+07	2.03446e+08		4.14631e+07	2.32369e+08	1.88705e+08	3.26957e+07	3.79708e+07	5.6087e+07		5.60424	0.000582178	4.55117	0.00772764	0.812094	0.306883
P80318	T-complex protein 1 subunit gamma OS=Mus musculus GN=Cct3 PE=1 SV=1 - [TCPG_MOUSE]	545	60.5914	6.69775	5.97016e+07	2.10022e+07	1.30011e+06	2.31205e+07	1.01336e+08	1.38241e+08	1.58004e+08	1.07981e+08	7.98243e+07	1.28992e+08	9.4719e+07	1.23612e+08		2.62811e+07	1.2639e+08	1.06787e+08	2.10881e+07	2.2948e+07	2.03024e+07		4.80917	0.00142806	4.06325	0.00311527	0.844896	0.310217
Q91XD4	Formimidoyltransferase-cyclodeaminase OS=Mus musculus GN=Ftcd PE=1 SV=1 - [FTCD_MOUSE]	541	58.9015	6.11279	1.24682e+09	1.00422e+09	1.21073e+09	1.14037e+09	2.62049e+09	1.96759e+09	2.846e+09	2.03254e+09	1.60851e+09	1.96232e+09	2.20463e+09	2.44693e+09		1.15053e+09	2.36665e+09	2.0556e+09	9.27455e+07	3.75863e+08	3.09816e+08		2.057	0.00160097	1.78664	0.00285954	0.868566	0.311053
Q9DBT9	Dimethylglycine dehydrogenase, mitochondrial OS=Mus musculus GN=Dmgdh PE=1 SV=1 - [M2GD_MOUSE]	869	97.194	7.88428	1.31548e+09	1.42091e+09	1.72959e+09	1.56485e+09	2.12821e+09	2.04431e+09	2.44186e+09	1.88385e+09	1.34085e+09	1.99924e+09	1.72487e+09	2.35694e+09		1.50771e+09	2.12456e+09	1.85548e+09	1.55711e+08	2.03147e+08	3.72167e+08		1.40913	0.00585129	1.23066	0.186025	0.873347	0.313818
Q922E4	Ethanolamine-phosphate cytidylyltransferase OS=Mus musculus GN=Pcyt2 PE=1 SV=1 - [PCY2_MOUSE]	404	45.2066	6.58057	3.94232e+07	4.85526e+07	4.88329e+07	4.70344e+07	7.27863e+07	1.25106e+08	8.79608e+07	6.30956e+07	5.77179e+07	5.99168e+07	9.26476e+07	7.00723e+07		4.59608e+07	8.72371e+07	7.00886e+07	3.83598e+06	2.35913e+07	1.3833e+07		1.89808	0.0242828	1.52497	0.0269375	0.803427	0.319137
Q9WUZ9	Ectonucleoside triphosphate diphosphohydrolase 5 OS=Mus musculus GN=Entpd5 PE=1 SV=1 - [ENTP5_MOUSE]	427	47.0717	5.2876	9.7065e+07	2.07027e+08	2.57966e+08	1.58473e+08	2.81656e+08	3.38602e+08	3.04854e+08	2.88565e+08	3.86793e+08	3.05535e+08	2.55286e+08	5.98319e+08		1.80133e+08	3.03419e+08	3.86483e+08	5.94784e+07	2.19894e+07	1.30996e+08		1.68442	0.0150905	2.14554	0.0475276	1.27376	0.320348
Q8VCH0	3-ketoacyl-CoA thiolase B, peroxisomal OS=Mus musculus GN=Acaa1b PE=1 SV=1 - [THIKB_MOUSE]	424	43.9678	8.51416	3.77288e+08	3.78486e+08	4.08777e+08	2.55773e+08	4.5587e+08	8.46897e+08	1.26707e+09	7.12132e+08	4.64776e+08	1.56051e+08	7.05501e+08	9.30392e+08		3.55081e+08	8.20493e+08	5.6418e+08	5.87073e+07	2.93609e+08	2.8746e+08		2.31072	0.0359443	1.58888	0.263198	0.687611	0.321456
Q64433	10 kDa heat shock protein, mitochondrial OS=Mus musculus GN=Hspe1 PE=1 SV=2 - [CH10_MOUSE]	102	10.9559	8.35303	4.69541e+08	6.49833e+08	6.07283e+08	3.55558e+08	1.20301e+09	1.25406e+09	1.3179e+09	1.14757e+09	9.44244e+08	3.27462e+09	2.11689e+09	9.69825e+08		5.20554e+08	1.23063e+09	1.82639e+09	1.16255e+08	6.2905e+07	9.60944e+08		2.36409	8.72343e-05	3.50856	0.0581079	1.48411	0.325127
P55264	Adenosine kinase OS=Mus musculus GN=Adk PE=1 SV=2 - [ADK_MOUSE]	361	40.1235	6.21436	9.7523e+08	9.33352e+08	8.32e+08	8.90838e+08	1.44993e+09	2.05622e+09	1.61202e+09	1.66045e+09	1.08337e+09	2.4493e+09	8.88352e+08	3.99914e+08		9.07855e+08	1.69465e+09	1.20523e+09	5.29929e+07	2.22835e+08	7.60182e+08		1.86666	0.00100805	1.32756	0.524269	0.711198	0.325722
Q9DCM2	Glutathione S-transferase kappa 1 OS=Mus musculus GN=Gstk1 PE=1 SV=3 - [GSTK1_MOUSE]	226	25.6873	8.88037	2.43273e+07	2.26471e+07	4.83062e+07	2.90805e+07	1.74581e+08	1.01906e+08	3.3994e+08	2.48391e+08	2.16769e+08	6.77277e+08	2.57331e+08	2.31909e+08		3.10903e+07	2.16204e+08	3.45821e+08	1.02158e+07	8.82371e+07	1.91914e+08		6.95408	0.0112365	11.1231	0.029704	1.59951	0.328743
Q8K370	Acyl-CoA dehydrogenase family member 10 OS=Mus musculus GN=Acad10 PE=1 SV=1 - [ACD10_MOUSE]	1069	118.903	8.23584	1.62041e+07	1.6466e+07	1.24385e+07	2.39233e+07	8.76443e+07	6.03537e+07	8.18329e+07	8.23162e+07	1.23942e+07	9.48744e+07	3.93934e+07	82289227		1.7258e+07	7.80368e+07	5.72378e+07	4.16508e+06	1.04609e+07	3.3066e+07		4.52178	8.48813e-05	3.3166	0.0829885	0.733472	0.338962
Q9QXG4	Acetyl-coenzyme A synthetase, cytoplasmic OS=Mus musculus GN=Acss2 PE=1 SV=2 - [ACSA_MOUSE]	701	78.8112	6.63916	1.73348e+06	1.73348e+06	1.73348e+06	1.73348e+06	2.44278e+08	1.68801e+08	1.08011e+08	1.73348e+06	1.73348e+06	1.73348e+06	2.1248e+08	1.73348e+06		1.73348e+06	1.30706e+08	5.442e+07	0	8.87396e+07	9.12558e+07		75.401	0.0454507	31.3935	0.355918	0.416355	0.33926
Q99LB7	Sarcosine dehydrogenase, mitochondrial OS=Mus musculus GN=Sardh PE=1 SV=1 - [SARDH_MOUSE]	919	101.618	6.7417	1.32649e+09	1.06778e+09	1.77036e+09	1.63791e+09	2.94428e+09	2.10331e+09	3.32221e+09	3.12447e+09	1.98501e+09	3.6982e+09	1.38599e+09	2.09377e+09		1.45063e+09	2.87357e+09	2.29074e+09	2.73532e+08	4.64363e+08	8.56123e+08		1.9809	0.00379819	1.57913	0.156571	0.797176	0.339929
Q61694	3 beta-hydroxysteroid dehydrogenase type 5 OS=Mus musculus GN=Hsd3b5 PE=1 SV=4 - [3BHS5_MOUSE]	373	41.8659	9.01221	3.92907e+07	5.89539e+07	3.65562e+07	2.53145e+07	1.26061e+08	8.60553e+07	9.33322e+07	1.19406e+08	8.74587e+07	7.48888e+07	8.18794e+07	1.21653e+08		4.00288e+07	1.06214e+08	9.14699e+07	1.21169e+07	1.68838e+07	1.7986e+07		2.65343	0.00149225	2.2851	0.00629751	0.861188	0.340492
P49429	4-hydroxyphenylpyruvate dioxygenase OS=Mus musculus GN=Hpd PE=1 SV=3 - [HPPD_MOUSE]	393	45.0259	7.06396	2.56891e+09	1.93732e+09	2.24637e+09	1.84352e+09	4.44271e+09	3.32205e+09	4.60946e+09	3.80997e+09	3.30755e+09	5.57336e+09	1.90533e+09	1.27294e+09		2.14903e+09	4.04605e+09	3.01479e+09	2.84576e+08	5.13487e+08	1.65053e+09		1.88273	0.00138492	1.40286	0.405103	0.745121	0.341286
Q99LC5	Electron transfer flavoprotein subunit alpha, mitochondrial OS=Mus musculus GN=Etfa PE=1 SV=2 - [ETFA_MOUSE]	333	34.9875	8.38232	2.0142e+09	1.49735e+09	2.17218e+09	1.95139e+09	3.35207e+09	2.50509e+09	2.83954e+09	2.75318e+09	2.71339e+09	3.39152e+09	2.83771e+09	3.7479e+09		1.90878e+09	2.86247e+09	3.17263e+09	2.50788e+08	3.0818e+08	4.18903e+08		1.49963	0.00596189	1.66212	0.00417636	1.10835	0.341436
O35490	Betaine--homocysteine S-methyltransferase 1 OS=Mus musculus GN=Bhmt PE=1 SV=1 - [BHMT1_MOUSE]	407	44.9919	7.89893	8.76708e+09	1.1402e+10	1.44183e+10	1.15173e+10	1.54204e+10	1.97061e+10	1.74026e+10	1.39001e+10	1.65011e+10	1.62988e+10	1.08693e+10	1.52409e+10		1.15261e+10	1.66073e+10	1.47276e+10	1.99953e+09	2.17787e+09	2.27839e+09		1.44083	0.0247422	1.27775	0.117116	0.886813	0.341445
Q91YI0	Argininosuccinate lyase OS=Mus musculus GN=Asl PE=1 SV=1 - [ARLY_MOUSE]	464	51.7066	6.96143	2.04019e+09	2.75387e+09	2.72817e+09	2.17914e+09	3.0993e+09	3.21786e+09	3.08069e+09	3.15106e+09	1.96792e+09	4.15668e+09	2.41495e+09	1.78252e+09		2.42534e+09	3.13723e+09	2.58052e+09	3.19606e+08	5.32169e+07	9.38587e+08		1.29352	0.00890973	1.06398	0.795416	0.822548	0.344598
Q8VI47	Canalicular multispecific organic anion transporter 1 OS=Mus musculus GN=Abcc2 PE=1 SV=2 - [MRP2_MOUSE]	1543	173.561	8.646	866739	866739	1.15133e+07	866739	8.98185e+06	1.30457e+07	1.95859e+07	1.78056e+07	9.3721e+06	1.57642e+07	3.77758e+07	2.34311e+07		3.52837e+06	1.48547e+07	2.15858e+07	4.61008e+06	4.14893e+06	1.059e+07		4.21009	0.0194888	6.11778	0.0352023	1.45313	0.34488
Q8R086	Sulfite oxidase, mitochondrial OS=Mus musculus GN=Suox PE=1 SV=2 - [SUOX_MOUSE]	546	60.7178	6.53662	9.32616e+07	1.67531e+08	8.29242e+07	1.6157e+08	2.7546e+07	3.04487e+07	3.62934e+07	3.4858e+07	1.73348e+06	3.85862e+07	1.73348e+06	4.11637e+07		1.26322e+08	3.22865e+07	2.08042e+07	3.84608e+07	3.48273e+06	1.90925e+07		0.25559	0.00557644	0.164693	0.00534292	0.644362	0.345006
Q9DB29	Isoamyl acetate-hydrolyzing esterase 1 homolog OS=Mus musculus GN=Iah1 PE=1 SV=1 - [IAH1_MOUSE]	249	27.9562	5.51611	5.11932e+07	3.31941e+07	4.51159e+07	4.40209e+07	9.32452e+07	8.33004e+07	1.91201e+08	8.77877e+07	6.69137e+07	9.27772e+07	9.60642e+07	9.22742e+07		4.3381e+07	1.13884e+08	8.70073e+07	6.48504e+06	4.47781e+07	1.1692e+07		2.62519	0.0356263	2.00565	0.00131697	0.764002	0.353305
Q9DD20	Methyltransferase-like protein 7B OS=Mus musculus GN=Mettl7b PE=1 SV=2 - [MET7B_MOUSE]	244	28.0305	8.5874	3.23497e+08	3.20104e+08	5.48176e+08	3.31647e+08	6.12052e+08	5.09743e+08	8.1515e+08	5.84602e+08	5.49926e+08	7.20383e+08	7.46011e+08	8.85817e+08		3.80856e+08	6.30387e+08	7.25534e+08	9.6693e+07	1.13054e+08	1.19347e+08		1.65518	0.0271471	1.90501	0.00810761	1.15093	0.354812
Q3ULD5	Methylcrotonoyl-CoA carboxylase beta chain, mitochondrial OS=Mus musculus GN=Mccc2 PE=1 SV=1 - [MCCB_MOUSE]	563	61.3402	8.00146	8.26209e+07	2.78531e+07	2.352e+07	4.67122e+07	1.68601e+08	7.85517e+07	2.38094e+08	1.46622e+08	8.22977e+07	1.46678e+08	1.522e+08	1.02312e+08		4.51765e+07	1.57967e+08	1.20872e+08	2.33107e+07	5.69406e+07	2.94951e+07		3.49667	0.019193	2.67554	0.0130242	0.76517	0.35505
P56657	Cytochrome P450 2C40 OS=Mus musculus GN=Cyp2c40 PE=1 SV=2 - [CP240_MOUSE]	491	55.7273	7.51807	866739	8.1927e+07	6.56343e+07	1.09397e+08	866739	866739	866739	866739	1.18327e+08	866739	866739	866739		6.44562e+07	866739	3.02318e+07	3.99058e+07	0	5.08619e+07		0.0134469	0.0328539	0.469029	0.394538	34.88	0.355918
O55071	Cytochrome P450 2B19 OS=Mus musculus GN=Cyp2b19 PE=2 SV=1 - [CP2BJ_MOUSE]	492	55.961	7.6792	866739	1.83765e+07	2.7289e+07	1.68527e+07	866739	866739	866739	866739	866739	2.36005e+07	866739	866739		1.58463e+07	866739	6.55019e+06	9.52285e+06	0	9.84402e+06		0.0546968	0.034435	0.413358	0.284289	7.55727	0.355918
P07309	Transthyretin OS=Mus musculus GN=Ttr PE=1 SV=1 - [TTHY_MOUSE]	147	15.766	6.16357	1.30011e+06	1.30011e+06	1.30011e+06	1.30011e+06	7.28851e+07	156290455	2.04144e+08	1.62143e+08	3.32819e+07	1.50317e+08	1.17209e+08	1.41465e+08		1.30011e+06	1.48866e+08	1.10568e+08	0	4.75925e+07	4.62382e+07		114.502	0.00171114	85.0454	0.00640679	0.742739	0.356068
Q8BHN3	Neutral alpha-glucosidase AB OS=Mus musculus GN=Ganab PE=1 SV=1 - [GANAB_MOUSE]	944	106.844	6.06201	9.13338e+06	2.83757e+07	2.39599e+07	1.60526e+07	3.43262e+07	2.96081e+07	3.72418e+07	5.16188e+07	2.59289e+07	8.61594e+07	5.81728e+07	3.83215e+07		1.93804e+07	3.81987e+07	5.21457e+07	7.3818e+06	8.21293e+06	2.27579e+07		1.971	0.0255589	2.69064	0.0553674	1.36512	0.356613
Q9CPY7	Cytosol aminopeptidase OS=Mus musculus GN=Lap3 PE=1 SV=3 - [AMPL_MOUSE]	519	56.1058	7.72314	8.20983e+08	8.39694e+08	1.06953e+09	9.07745e+08	1.36959e+09	1.17499e+09	1.5652e+09	1.16729e+09	1.31378e+09	1.32314e+09	1.00562e+09	1.15375e+09		9.09488e+08	1.31927e+09	1.19907e+09	9.78793e+07	1.63501e+08	1.30413e+08		1.45056	0.00979878	1.3184	0.0217726	0.908893	0.357967
P57776	Elongation factor 1-delta OS=Mus musculus GN=Eef1d PE=1 SV=3 - [EF1D_MOUSE]	281	31.2739	5.021	1.11754e+08	9.2867e+07	1.08171e+08	103254478	1.75479e+08	1.49733e+08	1.72339e+08	1.64613e+08	6.1417e+07	1.84281e+08	6.01499e+07	2.0311e+08		1.04012e+08	1.65541e+08	1.2724e+08	7.10677e+06	9.9464e+06	6.67902e+07		1.59156	0.000125925	1.22332	0.571094	0.768628	0.363828
Q9R0H0	Peroxisomal acyl-coenzyme A oxidase 1 OS=Mus musculus GN=Acox1 PE=1 SV=5 - [ACOX1_MOUSE]	661	74.6013	8.48486	2.08798e+09	1.24587e+09	2.25102e+09	1.46663e+09	3.52243e+09	3.02427e+09	4.18878e+09	2.92806e+09	2.70823e+09	3.92487e+09	2.95555e+09	2.35965e+09		1.76288e+09	3.41589e+09	2.98707e+09	4.1804e+08	5.00013e+08	5.8135e+08		1.93768	0.00460316	1.69443	0.0252432	0.874466	0.370151
P16332	Methylmalonyl-CoA mutase, mitochondrial OS=Mus musculus GN=Mut PE=1 SV=2 - [MUTA_MOUSE]	748	82.7916	6.88818	5.22007e+07	5.97858e+07	7.67516e+07	1.36277e+08	1.22592e+08	1.19209e+08	1.44511e+08	1.80426e+08	1.12407e+08	2.62208e+08	1.67587e+08	1.57656e+08		8.12537e+07	1.41685e+08	1.74964e+08	3.29877e+07	2.43852e+07	5.44952e+07		1.74373	0.0434008	2.15331	0.0436085	1.23488	0.371586
Q8VCM7	Fibrinogen gamma chain OS=Mus musculus GN=Fgg PE=1 SV=1 - [FIBG_MOUSE]	436	49.3598	5.85889	7.01977e+07	3.60956e+07	6.31647e+07	4.8431e+07	1.45318e+08	1.00831e+08	1.79573e+08	1.18547e+08	1.19321e+08	1.11197e+09	1.24204e+08	1.35889e+08		5.44723e+07	1.36067e+08	3.72846e+08	1.32008e+07	2.96939e+07	4.26776e+08		2.49792	0.00482757	6.84469	0.244053	2.74016	0.37476
Q9D8N0	Elongation factor 1-gamma OS=Mus musculus GN=Eef1g PE=1 SV=3 - [EF1G_MOUSE]	437	50.0292	6.7417	1.37907e+08	3.40556e+07	4.05593e+07	9.96518e+07	1.89992e+08	3.45522e+08	1.1264e+08	2.04647e+08	2.05942e+08	2.74316e+08	6.80956e+07	2.60022e+06		7.80435e+07	2.132e+08	1.37738e+08	4.29843e+07	8.40138e+07	1.07724e+08		2.73181	0.0477661	1.76489	0.407007	0.646052	0.375636
Q8BK48	Pyrethroid hydrolase Ces2e OS=Mus musculus GN=Ces2e PE=1 SV=1 - [EST2E_MOUSE]	559	62.2773	6.16357	2.16685e+06	2.16685e+06	2.16685e+06	2.16685e+06	4.342e+08	3.7543e+08	5.89583e+08	2.16685e+06	4.94812e+08	2.16685e+06	2.16685e+06	2.51448e+08		2.16685e+06	3.50345e+08	1.87648e+08	0	2.1571e+08	2.04467e+08		161.684	0.031341	86.5997	0.167187	0.535611	0.379672
P99027	60S acidic ribosomal protein P2 OS=Mus musculus GN=Rplp2 PE=1 SV=3 - [RLA2_MOUSE]	115	11.6438	4.53857	5.35828e+08	3.95664e+08	5.11321e+08	4.49832e+08	7.84798e+08	6.75236e+08	7.35279e+08	8.70147e+08	7.73387e+08	8.38968e+08	5.184e+08	6.18471e+08		4.73161e+08	7.66365e+08	6.87307e+08	5.46201e+07	7.13815e+07	1.26174e+08		1.61967	0.00131879	1.45258	0.0356825	0.89684	0.381335
P51855	Glutathione synthetase OS=Mus musculus GN=Gss PE=1 SV=1 - [GSHB_MOUSE]	474	52.214	5.79541	1.30011e+06	1.69661e+07	5.92457e+07	1.52948e+07	9.65394e+07	8.31115e+07	9.81317e+07	8.97374e+07	1.1781e+08	1.25129e+08	9.2722e+07	7.62118e+07		2.32017e+07	9.188e+07	1.02968e+08	2.16809e+07	5.96386e+06	1.95723e+07		3.96006	0.00184726	4.43797	0.00322412	1.12068	0.384139
P26350	Prothymosin alpha OS=Mus musculus GN=Ptma PE=1 SV=2 - [PTMA_MOUSE]	111	12.2471	3.78955	3.01242e+07	5.04554e+07	4.32875e+07	6.91112e+07	7.88046e+07	6.38953e+07	90406197	7.73514e+07	8.63449e+07	1.00545e+08	5.94978e+07	1.0919e+08		4.82446e+07	7.76144e+07	8.88944e+07	1.40821e+07	9.39853e+06	1.88302e+07		1.60877	0.0238643	1.84258	0.0241839	1.14533	0.389045
Q91YT0	NADH dehydrogenase [ubiquinone] flavoprotein 1, mitochondrial OS=Mus musculus GN=Ndufv1 PE=1 SV=1 - [NDUV1_MOUSE]	464	50.8017	8.20654	7.474e+07	6.54229e+07	6.32192e+07	1.73348e+06	1.34176e+08	1.11955e+08	1.98703e+08	1.36426e+08	1.67476e+08	1.46409e+08	1.73348e+06	1.12309e+08		5.12789e+07	1.45315e+08	1.06982e+08	2.89301e+07	3.2273e+07	6.3874e+07		2.83382	0.00942129	2.08627	0.217996	0.736205	0.389323
P20852	Cytochrome P450 2A5 OS=Mus musculus GN=Cyp2a5 PE=2 SV=1 - [CP2A5_MOUSE]	494	56.7043	9.20264	6.16097e+07	4.64301e+07	1.54864e+07	2.16685e+06	1.71045e+08	2.67678e+08	3.15324e+08	3.88426e+08	4.76823e+08	2.30663e+08	1.6458e+08	9.40904e+08		3.14233e+07	2.85618e+08	4.53243e+08	2.36978e+07	7.88999e+07	3.04646e+08		9.08939	0.00175399	14.4238	0.0539521	1.58688	0.391816
Q9JMD3	PCTP-like protein OS=Mus musculus GN=Stard10 PE=1 SV=1 - [PCTL_MOUSE]	291	32.9305	7.12256	2.39779e+08	2.11714e+08	3.20032e+08	2.87269e+08	3.64915e+08	3.70777e+08	4.67725e+08	4.33348e+08	2.94064e+08	3.56049e+08	3.20585e+08	4.85217e+08		2.64698e+08	4.09191e+08	3.63979e+08	4.18318e+07	4.31445e+07	7.33701e+07		1.54588	0.00591399	1.37507	0.0879249	0.889508	0.393034
P16045	Galectin-1 OS=Mus musculus GN=Lgals1 PE=1 SV=3 - [LEG1_MOUSE]	135	14.8562	5.49072	1.30011e+06	1.30011e+06	1.30011e+06	2.96242e+07	1.05945e+08	1.59294e+08	1.74499e+08	1.00843e+08	2.06693e+08	9.54509e+07	1.30011e+06	6.60595e+07		8.38113e+06	1.35145e+08	9.23759e+07	1.22647e+07	3.22536e+07	7.42719e+07		16.1249	0.000707247	11.0219	0.101475	0.683531	0.395545
Q9DBA8	Probable imidazolonepropionase OS=Mus musculus GN=Amdhd1 PE=1 SV=1 - [HUTI_MOUSE]	426	46.4586	6.94678	3.85826e+07	5.18176e+07	7.1756e+07	6.38264e+07	2.16685e+06	2.16685e+06	7.8797e+06	1.18033e+07	2.16685e+06	1.13871e+08	6.53314e+06	2.16685e+06		5.64957e+07	6.00419e+06	3.11845e+07	1.25437e+07	4.08038e+06	4.77724e+07		0.106277	0.00056772	0.551979	0.408921	5.19378	0.398083
Q9CR57	60S ribosomal protein L14 OS=Mus musculus GN=Rpl14 PE=1 SV=3 - [RL14_MOUSE]	217	23.5492	11.019	1.96659e+08	2.07286e+08	2.47859e+08	2.23933e+08	4.22619e+08	331048201	3.27002e+08	3.48738e+08	2.69433e+08	3.26984e+08	3.09738e+08	3.97267e+08		2.18934e+08	3.57352e+08	3.25855e+08	1.93227e+07	3.85585e+07	4.62171e+07		1.63223	0.00143436	1.48837	0.0101253	0.911861	0.399677
Q922Q1	Mitochondrial amidoxime reducing component 2 OS=Mus musculus GN=Marc2 PE=1 SV=1 - [MARC2_MOUSE]	338	38.1696	8.67529	5.6931e+08	4.60608e+08	4.21145e+08	4.57285e+08	8.97872e+08	8.66837e+08	5.85132e+08	9.66977e+08	6.91727e+08	9.72516e+08	4.68427e+08	7.01946e+08		4.77087e+08	8.29204e+08	7.08654e+08	5.54489e+07	1.45503e+08	1.7865e+08		1.73806	0.00783083	1.48538	0.0757118	0.854619	0.399746
P97872	Dimethylaniline monooxygenase [N-oxide-forming] 5 OS=Mus musculus GN=Fmo5 PE=1 SV=4 - [FMO5_MOUSE]	533	59.962	8.73389	7.00057e+08	7.19616e+08	9.3008e+08	8.51597e+08	2.01365e+09	2.22508e+09	2.22337e+09	1.79439e+09	2.40681e+09	2.6226e+09	1.50278e+09	2.84869e+09		8.00337e+08	2.06412e+09	2.34522e+09	9.49111e+07	1.77883e+08	5.10862e+08		2.57906	3.61793e-05	2.93029	0.00211583	1.13618	0.402771
P14152	Malate dehydrogenase, cytoplasmic OS=Mus musculus GN=Mdh1 PE=1 SV=3 - [MDHC_MOUSE]	334	36.4881	6.58057	1.773e+09	1.014e+09	1.74065e+09	1.62061e+09	3.59404e+09	3.01106e+09	3.64887e+09	3.33196e+09	2.74563e+09	3.14687e+09	3.20857e+09	3.64966e+09		1.53706e+09	3.39648e+09	3.18768e+09	3.07281e+08	2.52709e+08	3.2052e+08		2.20972	0.000190544	2.07388	0.000663933	0.938525	0.409695
P97364	Selenide, water dikinase 2 OS=Mus musculus GN=Sephs2 PE=1 SV=3 - [SPS2_MOUSE]	452	47.804	6.06201	8.15711e+07	4.83088e+07	4.98355e+07	5.29251e+07	2.48725e+08	1.25673e+08	2.4665e+08	2.24648e+08	3.15341e+08	1.31771e+08	2.67734e+08	3.11776e+08		58160131	2.11424e+08	2.56656e+08	1.36182e+07	5.03992e+07	7.45002e+07		3.63521	0.00225483	4.41291	0.00393496	1.21394	0.417237
Q8VEK3	Heterogeneous nuclear ribonucleoprotein U OS=Mus musculus GN=Hnrnpu PE=1 SV=1 - [HNRPU_MOUSE]	800	87.8627	6.23975	1.30011e+06	1.30011e+06	1.30011e+06	1.30011e+06	7.21474e+07	5.56751e+07	9.5792e+07	1.30011e+06	1.30011e+06	9.34977e+07	9.31041e+07	1.79608e+08		1.30011e+06	5.62286e+07	9.18775e+07	0	3.47711e+07	6.30576e+07		43.2492	0.0339082	70.669	0.0472928	1.634	0.424106
O08997	Copper transport protein ATOX1 OS=Mus musculus GN=Atox1 PE=1 SV=1 - [ATOX1_MOUSE]	68	7.33366	6.50732	1.73348e+06	1.73348e+06	5.03041e+07	4.99091e+07	3.32869e+08	2.52216e+08	2.4917e+08	3.35261e+08	6.04108e+08	4.5429e+08	9.50395e+07	3.88473e+08		2.592e+07	2.92379e+08	3.85478e+08	2.4187e+07	4.17084e+07	1.84998e+08		11.28	7.42739e-05	14.8718	0.0156514	1.31842	0.427782
Q9DB77	Cytochrome b-c1 complex subunit 2, mitochondrial OS=Mus musculus GN=Uqcrc2 PE=1 SV=1 - [QCR2_MOUSE]	453	48.205	9.24658	5.48384e+08	4.06874e+08	4.54801e+08	3.95632e+08	5.76872e+08	8.18647e+08	7.06727e+08	7.20209e+08	7.25115e+08	1.07861e+09	5.66265e+08	8.57708e+08		4.51423e+08	7.05613e+08	8.06925e+08	6.02289e+07	8.59729e+07	1.87752e+08		1.56309	0.00572235	1.78752	0.0205108	1.14358	0.428053
Q8BG05	Heterogeneous nuclear ribonucleoprotein A3 OS=Mus musculus GN=Hnrnpa3 PE=1 SV=1 - [ROA3_MOUSE]	379	39.6276	9.01221	6.32744e+07	1.11207e+08	2.3678e+07	6.25163e+07	1.22861e+08	1.0512e+08	1.34738e+08	1.41665e+08	1.01902e+08	1.27048e+08	1.46766e+08	2.13927e+08		6.51688e+07	1.26096e+08	1.47411e+08	3.10306e+07	1.38521e+07	4.15647e+07		1.93491	0.0209706	2.26199	0.0334585	1.16904	0.431723
Q9D172	ES1 protein homolog, mitochondrial OS=Mus musculus GN=D10Jhu81e PE=1 SV=1 - [ES1_MOUSE]	266	28.0728	8.77783	2.16685e+06	4.23998e+07	2.16685e+06	4.29882e+07	1.82669e+08	1.9947e+08	1.89991e+08	3.43489e+08	1.89287e+08	2.71826e+08	2.84194e+08	3.3436e+08		2.24304e+07	2.28905e+08	2.69917e+08	2.02646e+07	6.64226e+07	5.21096e+07		10.2051	0.0021158	12.0335	0.000257445	1.17917	0.432365
P31786	Acyl-CoA-binding protein OS=Mus musculus GN=Dbi PE=1 SV=2 - [ACBP_MOUSE]	87	9.99414	8.82178	1.01632e+09	7.90295e+08	8.84907e+08	1.09543e+09	4.13483e+09	3.74945e+09	3.99671e+09	1.11899e+09	3.57968e+09	3.62474e+09	1.30596e+09	1.17283e+09		9.46739e+08	3.25e+09	2.4208e+09	1.17526e+08	1.23806e+09	1.18245e+09		3.43283	0.0184169	2.55699	0.0752492	0.744864	0.43367
P99029	Peroxiredoxin-5, mitochondrial OS=Mus musculus GN=Prdx5 PE=1 SV=2 - [PRDX5_MOUSE]	210	21.8835	8.85107	8.4102e+08	7.19507e+08	9.04776e+08	9.65753e+08	1.77006e+09	1.72138e+09	1.82553e+09	1.65582e+09	1.86845e+09	1.39054e+09	1.29782e+09	1.8835e+09		8.57764e+08	1.7432e+09	1.61008e+09	9.11965e+07	6.24708e+07	2.67963e+08		2.03226	8.73276e-06	1.87706	0.00367853	0.923636	0.434155
P05784	Keratin, type I cytoskeletal 18 OS=Mus musculus GN=Krt18 PE=1 SV=5 - [K1C18_MOUSE]	423	47.5092	5.32568	4.61286e+08	1.49895e+09	1.39054e+09	2.03958e+09	4.17631e+09	2.45145e+09	2.36029e+09	2.9221e+09	3.41898e+09	3.85517e+09	2.34699e+09	4.14536e+09		1.34759e+09	2.97754e+09	3.44163e+09	5.67703e+08	7.24207e+08	6.82825e+08		2.20953	0.0219987	2.55391	0.00646953	1.15586	0.450153
Q9R1P4	Proteasome subunit alpha type-1 OS=Mus musculus GN=Psma1 PE=1 SV=1 - [PSA1_MOUSE]	263	29.5278	6.45557	1.07397e+07	5.02427e+07	1.18135e+08	8.75918e+07	1.6797e+08	1.544e+08	2.24542e+08	1.00688e+08	1.78397e+08	1.952e+08	1.61821e+08	1.9868e+08		6.66774e+07	1.619e+08	1.83524e+08	4.02631e+07	4.40566e+07	1.46915e+07		2.42811	0.0327056	2.75242	0.00325118	1.13357	0.450737
Q8R0N6	Hydroxyacid-oxoacid transhydrogenase, mitochondrial OS=Mus musculus GN=Adhfe1 PE=1 SV=2 - [HOT_MOUSE]	465	49.9053	7.57666	866739	866739	866739	866739	96027066	7.28811e+07	9.99695e+07	7.01819e+07	7.30132e+07	6.84634e+07	866739	1.16589e+08		866739	8.47649e+07	6.47331e+07	0	1.33408e+07	4.13837e+07		97.7974	3.55006e-05	74.6858	0.0368773	0.763678	0.455305
Q8VDJ3	Vigilin OS=Mus musculus GN=Hdlbp PE=1 SV=1 - [VIGLN_MOUSE]	1268	141.655	6.87354	5.84681e+07	5.39896e+07	9.86533e+07	6.92709e+07	1.55682e+08	1.38706e+08	1.82655e+08	1.69089e+08	1.25489e+08	1.80421e+08	1.80501e+08	7.45081e+07		7.00955e+07	1.61533e+08	1.4023e+08	1.73984e+07	1.62678e+07	4.40844e+07		2.30447	0.000559015	2.00055	0.0427278	0.868118	0.462185
P10605	Cathepsin B OS=Mus musculus GN=Ctsb PE=1 SV=2 - [CATB_MOUSE]	339	37.2557	5.90967	8.62364e+07	1.05852e+08	7.24612e+07	1.28614e+08	2.13061e+08	3.60618e+08	2.31866e+08	1.41857e+08	2.38304e+08	5.55664e+08	1.78931e+08	2.71882e+08		9.82909e+07	2.3685e+08	3.11195e+08	2.1149e+07	7.89511e+07	1.45015e+08		2.40969	0.0260749	3.16606	0.0455145	1.31389	0.465106
P56480	ATP synthase subunit beta, mitochondrial OS=Mus musculus GN=Atp5b PE=1 SV=2 - [ATPB_MOUSE]	529	56.2655	5.33838	2.83467e+09	2.94302e+09	3.98585e+09	2.95782e+09	5.06687e+09	4.34311e+09	4.9156e+09	5.56893e+09	4.42307e+09	7.02056e+09	4.97426e+09	5.36563e+09		3.18034e+09	4.97363e+09	5.44588e+09	4.67485e+08	4.37034e+08	9.6884e+08		1.56387	0.00284132	1.71236	0.0107346	1.09495	0.470741
Q9DCW4	Electron transfer flavoprotein subunit beta OS=Mus musculus GN=Etfb PE=1 SV=3 - [ETFB_MOUSE]	255	27.606	8.104	1.83391e+09	1.54085e+09	1.68e+09	9.74359e+08	2.99351e+09	3.29104e+09	2.47415e+09	2.11227e+09	2.52401e+09	4.05466e+09	2.81023e+09	2.80557e+09		1.50728e+09	2.71774e+09	3.04862e+09	3.24672e+08	4.55699e+08	5.92291e+08		1.80308	0.00954278	2.0226	0.00751607	1.12175	0.472243
Q8CGC7	Bifunctional glutamate/proline--tRNA ligase OS=Mus musculus GN=Eprs PE=1 SV=4 - [SYEP_MOUSE]	1512	169.972	7.66455	3.05946e+07	2.24282e+07	3.83386e+07	3.69253e+07	1.27326e+08	3.73292e+07	1.12804e+08	1.12957e+08	5.31184e+07	1.23146e+08	5.27206e+07	8.12974e+07		3.20717e+07	9.76041e+07	7.75705e+07	6.2851e+06	3.5296e+07	2.87507e+07		3.04331	0.0194164	2.41866	0.0366443	0.794747	0.474814
O08677	Kininogen-1 OS=Mus musculus GN=Kng1 PE=1 SV=1 - [KNG1_MOUSE]	661	73.0564	6.53662	1.73348e+06	1.73348e+06	1.73348e+06	1.73348e+06	5.18511e+07	6.78173e+07	1.78842e+08	5.94171e+07	6.85293e+07	8.11116e+07	3.81035e+07	7.47737e+07		1.73348e+06	8.94819e+07	6.56295e+07	0	5.19003e+07	1.6503e+07		51.6198	0.0263418	37.86	0.000533927	0.733439	0.476829
Q99JR1	Sideroflexin-1 OS=Mus musculus GN=Sfxn1 PE=1 SV=3 - [SFXN1_MOUSE]	322	35.6263	9.23193	5.13207e+07	9.87957e+07	1.05152e+08	1.00002e+08	1.57978e+08	1.01727e+08	2.32037e+08	2.78076e+08	7.46132e+07	3.33806e+08	1.18724e+08	1.73348e+06		8.88175e+07	1.92454e+08	1.32219e+08	2.178e+07	6.7672e+07	1.23657e+08		2.16685	0.0449819	1.48866	0.571263	0.687016	0.487164
P63017	Heat shock cognate 71 kDa protein OS=Mus musculus GN=Hspa8 PE=1 SV=1 - [HSP7C_MOUSE]	646	70.8272	5.51611	1.40392e+09	9.12324e+08	8.96798e+08	9.02124e+08	2.48566e+09	1.49418e+09	1.78719e+09	1.67123e+09	1.77607e+09	1.51427e+09	1.03513e+09	2.16338e+09		1.02879e+09	1.85956e+09	1.62221e+09	2.16653e+08	3.76233e+08	4.1014e+08		1.80752	0.0161172	1.57682	0.0685834	0.872363	0.488003
Q9EQF5	Dihydropyrimidinase OS=Mus musculus GN=Dpys PE=1 SV=2 - [DPYS_MOUSE]	519	56.6886	7.1958	3.27673e+08	3.27359e+08	3.36915e+08	3.23686e+08	1.40738e+08	1.79285e+08	1.22395e+08	1.55615e+08	1.30467e+08	1.26082e+08	1.56972e+08	1.44494e+08		3.28908e+08	1.49508e+08	1.39504e+08	4.88129e+06	2.08326e+07	1.21641e+07		0.45456	6.68518e-06	0.424142	2.67757e-07	0.933083	0.499566
Q9DBG6	Dolichyl-diphosphooligosaccharide--protein glycosyltransferase subunit 2 OS=Mus musculus GN=Rpn2 PE=1 SV=1 - [RPN2_MOUSE]	631	69.02	5.80811	9.50255e+07	1.69868e+08	1.38472e+08	1.85598e+08	3.06026e+08	2.28585e+08	4.28571e+08	4.36219e+08	2.38259e+08	3.46812e+08	2.67718e+08	3.774e+08		1.47241e+08	3.4985e+08	3.07547e+08	3.45926e+07	8.70092e+07	5.65873e+07		2.37604	0.00953329	2.08873	0.00577198	0.879082	0.506695
P40142	Transketolase OS=Mus musculus GN=Tkt PE=1 SV=1 - [TKT_MOUSE]	623	67.5876	7.50342	4.39495e+08	5.39685e+08	4.97171e+08	7.03644e+08	1.5106e+08	1.10771e+08	1.52194e+08	7.61551e+07	1.43536e+08	8.22752e+07	1.51751e+08	1.96286e+08		5.44999e+08	1.22545e+08	1.43462e+08	9.82539e+07	3.15547e+07	4.06293e+07		0.224853	0.00039495	0.263234	0.000610238	1.17069	0.507671
P45952	Medium-chain specific acyl-CoA dehydrogenase, mitochondrial OS=Mus musculus GN=Acadm PE=1 SV=1 - [ACADM_MOUSE]	421	46.4516	8.36768	7.76227e+08	5.54725e+08	6.61762e+08	5.23063e+08	1.02056e+09	1.14842e+09	1.64921e+09	8.69094e+08	1.29173e+09	2.43252e+09	8.37923e+08	1.20431e+09		6.28944e+08	1.17182e+09	1.44162e+09	9.93586e+07	2.92817e+08	5.9689e+08		1.86315	0.022777	2.29213	0.0589458	1.23024	0.508469
P38647	Stress-70 protein, mitochondrial OS=Mus musculus GN=Hspa9 PE=1 SV=3 - [GRP75_MOUSE]	679	73.4156	6.07471	6.88241e+08	5.97108e+08	3.68777e+08	7.18837e+08	1.8166e+09	1.47877e+09	2.01975e+09	2.63229e+09	1.2567e+09	2.90664e+09	1.11017e+09	1.30534e+09		5.93241e+08	1.98685e+09	1.64471e+09	1.37112e+08	4.19764e+08	7.32107e+08		3.34915	0.0015635	2.77242	0.050123	0.827797	0.508855
Q00623	Apolipoprotein A-I OS=Mus musculus GN=Apoa1 PE=1 SV=2 - [APOA1_MOUSE]	264	30.5966	5.73193	7.03315e+08	3.05109e+08	5.59755e+08	4.45947e+08	8.20831e+08	1.16617e+09	1.24845e+09	9.0523e+08	1.32852e+09	1.40605e+09	1.01834e+09	8.52185e+08		5.03532e+08	1.03517e+09	1151273947	1.46426e+08	1.77113e+08	2.25528e+08		2.05582	0.00706235	2.2864	0.00586304	1.11216	0.509405
P28843	Dipeptidyl peptidase 4 OS=Mus musculus GN=Dpp4 PE=1 SV=3 - [DPP4_MOUSE]	760	87.3812	6.41748	1.73348e+06	3.1807e+07	2.11073e+07	1.88599e+07	1.66666e+08	6.8001e+07	7.77854e+07	7.30968e+07	1.73348e+06	1.37135e+08	6.22704e+07	8.21935e+07		1.83769e+07	9.63874e+07	7.08332e+07	1.07826e+07	4.07228e+07	4.84074e+07		5.24503	0.0184258	3.85447	0.116661	0.734881	0.510325
P19096	Fatty acid synthase OS=Mus musculus GN=Fasn PE=1 SV=2 - [FAS_MOUSE]	2504	272.257	6.58057	9.79913e+08	1.46244e+09	2.32044e+09	1.05284e+09	3.40608e+09	5.80388e+09	3.79176e+09	1.73948e+09	1.43469e+09	8.79928e+08	6.27633e+09	2.01779e+09		1.45391e+09	3.6853e+09	2.65218e+09	5.33027e+08	1.44602e+09	2.13073e+09		2.53475	0.0460388	1.82417	0.381167	0.719666	0.513117
Q9DCN2	NADH-cytochrome b5 reductase 3 OS=Mus musculus GN=Cyb5r3 PE=1 SV=3 - [NB5R3_MOUSE]	301	34.1057	8.38232	5.31808e+08	3.7146e+08	5.34311e+08	5.34892e+08	7.85576e+08	7.36703e+08	8.98142e+08	6.2828e+08	6.95072e+08	6.55604e+08	9.91384e+08	1.00686e+09		4.93118e+08	7.62175e+08	8.37231e+08	7.02487e+07	9.69684e+07	1.62586e+08		1.54563	0.00805872	1.69783	0.0151318	1.09848	0.517905
Q61598	Rab GDP dissociation inhibitor beta OS=Mus musculus GN=Gdi2 PE=1 SV=1 - [GDIB_MOUSE]	445	50.5047	6.25244	1.96223e+08	1.48218e+08	2.87469e+08	1.36569e+08	5.07657e+08	3.41806e+08	3.01814e+08	5.00725e+08	4.07143e+08	2.41736e+08	6.01021e+08	7.28547e+08		1.9212e+08	4.13e+08	4.94612e+08	5.94172e+07	9.23126e+07	1.85503e+08		2.1497	0.0130645	2.5745	0.0360636	1.19761	0.520561
Q8VCN5	Cystathionine gamma-lyase OS=Mus musculus GN=Cth PE=1 SV=1 - [CGL_MOUSE]	398	43.5392	7.6499	1.07408e+09	1.00323e+09	1.4422e+09	5.71531e+08	2.40518e+09	2.24564e+09	2.42741e+09	3.13884e+09	2784101664	3.51814e+09	1.7244e+09	3.44592e+09		1.02276e+09	2.55427e+09	2.86814e+09	3.09253e+08	3.4471e+08	7.19641e+08		2.49743	0.00122859	2.80431	0.00649716	1.12288	0.521094
Q61233	Plastin-2 OS=Mus musculus GN=Lcp1 PE=1 SV=4 - [PLSL_MOUSE]	627	70.1048	5.32568	2.67385e+07	2.1682e+07	2.62769e+07	8.65885e+07	7.29863e+07	1.39242e+08	1.05152e+08	1.65171e+08	1.47153e+08	7.32557e+07	7.61811e+07	1.14287e+08		4.03215e+07	1.20638e+08	1.02719e+08	2.67853e+07	3.47841e+07	3.03339e+07		2.9919	0.0193509	2.54751	0.0369916	0.851469	0.52633
Q91X91	Nicotinate-nucleotide pyrophosphorylase [carboxylating] OS=Mus musculus GN=Qprt PE=1 SV=1 - [NADC_MOUSE]	299	31.5102	6.7124	3.13709e+07	3.07343e+07	2.19991e+07	4.2024e+06	1.87912e+08	2.89817e+07	219908262	1.75845e+08	1.31583e+08	2.02659e+08	9.21491e+07	4.13774e+07		2.20767e+07	1.53162e+08	1.16942e+08	1.09639e+07	7.3481e+07	5.89203e+07		6.93772	0.0223386	5.2971	0.033662	0.763522	0.530133
P16460	Argininosuccinate synthase OS=Mus musculus GN=Ass1 PE=1 SV=1 - [ASSY_MOUSE]	412	46.555	8.22119	1.16594e+10	1.54722e+10	1.61387e+10	1.08745e+10	2.52159e+10	2.95624e+10	2.54678e+10	3.56412e+10	1.87046e+10	3.33364e+10	2.8543e+10	2.49999e+10		1.35362e+10	2.89718e+10	2.6396e+10	2.29827e+09	4.21943e+09	5.33587e+09		2.14032	0.00142704	1.95003	0.00862047	0.911091	0.536243
P05201	Aspartate aminotransferase, cytoplasmic OS=Mus musculus GN=Got1 PE=1 SV=3 - [AATC_MOUSE]	413	46.2185	7.13721	6.32881e+08	6.54487e+08	8.54071e+08	4.89552e+08	2.63357e+09	2.0099e+09	1.81877e+09	4.23913e+09	7.70364e+08	4.67559e+09	1.57486e+09	8.8147e+08		6.57748e+08	2.67534e+09	1.97557e+09	1.29867e+08	9.51802e+08	1.58904e+09		4.06743	0.010863	3.00354	0.202208	0.738436	0.537148
P35492	Histidine ammonia-lyase OS=Mus musculus GN=Hal PE=1 SV=1 - [HUTH_MOUSE]	657	72.2124	6.34131	4.17095e+08	6.10217e+08	7.41118e+08	5.08634e+08	9.23041e+08	9.71036e+08	8.8158e+08	1.4915e+09	6.04862e+08	1.68482e+09	6.38279e+08	5.40422e+08		5.69266e+08	1.06679e+09	8.67097e+08	1.2046e+08	2.47244e+08	4.73423e+08		1.87398	0.0202401	1.52318	0.331627	0.812809	0.541218
Q05920	Pyruvate carboxylase, mitochondrial OS=Mus musculus GN=Pc PE=1 SV=1 - [PYC_MOUSE]	1178	129.602	6.7124	1.94976e+09	1.66731e+09	1.77866e+09	2.21076e+09	3.22556e+09	3.12056e+09	3.70527e+09	2.81506e+09	2.53897e+09	4.11563e+09	2.44981e+09	2.63815e+09		1.90162e+09	3.21661e+09	2.93564e+09	2.04883e+08	3.19895e+08	6.84518e+08		1.69151	0.000968227	1.54375	0.0461193	0.912649	0.543337
P27773	Protein disulfide-isomerase A3 OS=Mus musculus GN=Pdia3 PE=1 SV=2 - [PDIA3_MOUSE]	505	56.6427	6.21436	1.04316e+09	1.11575e+09	1.2225e+09	1.35084e+09	1.77437e+09	1.27347e+09	1.69827e+09	1.96372e+09	1.47182e+09	1.60265e+09	1.4456e+09	1.77164e+09		1.18306e+09	1.67745e+09	1.57292e+09	1.1598e+08	2.52476e+08	1.29233e+08		1.41789	0.0216073	1.32953	0.00808856	0.937685	0.54683
P17182	Alpha-enolase OS=Mus musculus GN=Eno1 PE=1 SV=3 - [ENOA_MOUSE]	434	47.1112	6.80029	2.01578e+09	1.40579e+09	1.46977e+09	1.30392e+09	2.28905e+09	2.11931e+09	2.18031e+09	1.99621e+09	2.02987e+09	1.99425e+09	2.6151e+09	2.34408e+09		1.54882e+09	2.14622e+09	2.24583e+09	2.76016e+08	1.05817e+08	2.52955e+08		1.38572	0.0128201	1.45003	0.0180332	1.04641	0.552406
Q920E5	Farnesyl pyrophosphate synthase OS=Mus musculus GN=Fdps PE=1 SV=1 - [FPPS_MOUSE]	353	40.5557	5.65576	1.4543e+08	1.90132e+08	3.04621e+08	1.50225e+08	5.7683e+08	4.20795e+08	4.32693e+08	5.49028e+08	2.0251e+08	3.21276e+08	7.62845e+08	3.76169e+08		1.97602e+08	4.94836e+08	4.157e+08	6.41783e+07	6.89268e+07	2.10023e+08		2.50421	0.00156312	2.10373	0.1362	0.840076	0.557996
Q9QZE5	Coatomer subunit gamma-1 OS=Mus musculus GN=Copg1 PE=1 SV=1 - [COPG1_MOUSE]	874	97.4504	5.35107	4.56627e+07	5.761e+07	6.42255e+07	6.01494e+07	7.91948e+07	6.33504e+07	9.16107e+07	1.08783e+08	5.82555e+07	9.25795e+07	7.58012e+07	8.62181e+07		5.69119e+07	8.57347e+07	7.82136e+07	6.91017e+06	1.66552e+07	1.29865e+07		1.50645	0.0324831	1.37429	0.0460207	0.912274	0.560018
P14824	Annexin A6 OS=Mus musculus GN=Anxa6 PE=1 SV=3 - [ANXA6_MOUSE]	673	75.8374	5.50342	5.9013e+08	6.64705e+08	6.67471e+08	5.41526e+08	1.35983e+09	1.33649e+09	1.42738e+09	1.40826e+09	1.11941e+09	1.8282e+09	1.03936e+09	1.08234e+09		6.15958e+08	1.38299e+09	1.26733e+09	5.30026e+07	3.6426e+07	3.25058e+08		2.24526	8.37397e-07	2.05749	0.0140477	0.916371	0.562721
Q9Z2V4	Phosphoenolpyruvate carboxykinase, cytosolic [GTP] OS=Mus musculus GN=Pck1 PE=1 SV=1 - [PCKGC_MOUSE]	622	69.3101	6.59521	5.46716e+08	3.19999e+08	2.22752e+08	4.03256e+08	6.97667e+08	7.14572e+08	7.61975e+08	4.92928e+08	5.91013e+08	1.04715e+09	2.39732e+08	3.24861e+08		3.7318e+08	6.66785e+08	5.50689e+08	1.18823e+08	1.03108e+08	3.1456e+08		1.78676	0.017855	1.47566	0.395792	0.825886	0.565812
P17717	UDP-glucuronosyltransferase 2B17 OS=Mus musculus GN=Ugt2b17 PE=1 SV=1 - [UDB17_MOUSE]	530	60.8161	7.86963	1.13229e+09	1.10954e+09	1.15655e+09	1.02e+09	1.93902e+09	2.15988e+09	2.06922e+09	1.46595e+09	2.47376e+09	7.62694e+08	1.28963e+09	2.10397e+09		1.1046e+09	1.90852e+09	1.65751e+09	5.15936e+07	2.67304e+08	6.71121e+08		1.7278	0.00218944	1.50056	0.204648	0.86848	0.569316
P25688	Uricase OS=Mus musculus GN=Uox PE=1 SV=2 - [URIC_MOUSE]	303	35.017	8.35303	1.16731e+09	2.01278e+09	2.28058e+09	1.47373e+09	3.6779e+09	5.71911e+09	3.91545e+09	3.31699e+09	3.21027e+09	4.93632e+09	2.71668e+09	4.02848e+09		1.7336e+09	4.15736e+09	3.72294e+09	4.37419e+08	9.2651e+08	8.42769e+08		2.39811	0.00637615	2.14751	0.010981	0.895505	0.569977
Q9QXD1	Peroxisomal acyl-coenzyme A oxidase 2 OS=Mus musculus GN=Acox2 PE=1 SV=2 - [ACOX2_MOUSE]	681	76.814	7.45947	2.1833e+08	1.46735e+08	1.6315e+08	1.84945e+08	5.83069e+08	6.34517e+08	3.15388e+08	6.14589e+08	6.35137e+08	7.87327e+08	4.22437e+08	5.56054e+08		1.7829e+08	5.36891e+08	6.00239e+08	2.67976e+07	1.29194e+08	1.32085e+08		3.01133	0.00330066	3.36664	0.0016288	1.11799	0.574302
Q9CZS1	Aldehyde dehydrogenase X, mitochondrial OS=Mus musculus GN=Aldh1b1 PE=1 SV=1 - [AL1B1_MOUSE]	519	57.5165	7.02002	3.03359e+06	3.03359e+06	3.56197e+08	3.85149e+08	1.09567e+09	1.61519e+09	1.28125e+09	2.45944e+09	1.22037e+09	2.63214e+09	7.2218e+08	5.44304e+08		1.86853e+08	1.61289e+09	1.27975e+09	1.84105e+08	5.23009e+08	8.19185e+08		8.63184	0.00430754	6.84895	0.0650344	0.793452	0.574403
Q9QXF8	Glycine N-methyltransferase OS=Mus musculus GN=Gnmt PE=1 SV=3 - [GNMT_MOUSE]	293	32.6543	7.44482	2.59992e+09	2.2871e+09	2.95965e+09	2.20826e+09	3.70384e+09	4.58417e+09	4.17678e+09	3.81815e+09	2.06229e+09	5.50744e+09	4.39288e+09	2.34616e+09		2.51373e+09	4.07074e+09	3.57719e+09	2.96203e+08	3.43974e+08	1.43192e+09		1.6194	0.00101579	1.42306	0.25456	0.878759	0.582722
P47791	Glutathione reductase, mitochondrial OS=Mus musculus GN=Gsr PE=1 SV=3 - [GSHR_MOUSE]	500	53.6285	7.98682	866739	866739	866739	866739	6.11299e+07	5.9283e+07	7.66553e+07	866739	9.73307e+07	866739	866739	3.39333e+07		866739	4.94837e+07	3.32494e+07	0	2.88685e+07	3.93832e+07		57.0918	0.0267384	38.3615	0.204264	0.671926	0.585656
Q571F8	Glutaminase liver isoform, mitochondrial OS=Mus musculus GN=Gls2 PE=1 SV=2 - [GLSL_MOUSE]	602	66.3232	7.66455	1.15997e+08	6.69165e+07	7.88721e+07	6.56946e+07	2.57535e+08	2.24519e+08	1.77575e+08	3.98298e+08	5.11587e+07	3.56482e+08	3.06801e+08	1.48097e+08		8.187e+07	2.64482e+08	2.15635e+08	2.03646e+07	8.23178e+07	1.22232e+08		3.23051	0.00973781	2.63387	0.110726	0.815309	0.586748
Q68FD5	Clathrin heavy chain 1 OS=Mus musculus GN=Cltc PE=1 SV=3 - [CLH1_MOUSE]	1675	191.435	5.69385	4.03009e+08	6.96133e+08	6.72663e+08	4.07632e+08	8.26557e+08	7.10196e+08	9.93077e+08	1.02605e+09	8.77687e+08	1.28046e+09	6.0158e+08	1.189e+09		5.44859e+08	8.88969e+08	9.87182e+08	1.39795e+08	1.27949e+08	2.68058e+08		1.63156	0.0199394	1.81181	0.0444303	1.11048	0.587647
P09103	Protein disulfide-isomerase OS=Mus musculus GN=P4hb PE=1 SV=2 - [PDIA1_MOUSE]	509	57.0228	4.88135	2.69919e+09	2.1947e+09	2.53002e+09	2.15913e+09	3.89881e+09	3.63783e+09	4.60954e+09	3.79893e+09	3.81936e+09	4.18469e+09	3.7603e+09	4.99642e+09		2.39576e+09	3.98628e+09	4.19019e+09	2.27217e+08	3.71692e+08	4.93042e+08		1.66389	0.000730838	1.749	0.00123183	1.05115	0.588087
Q8VCX1	3-oxo-5-beta-steroid 4-dehydrogenase OS=Mus musculus GN=Akr1d1 PE=1 SV=1 - [AK1D1_MOUSE]	325	37.2662	6.90283	2.01493e+08	1.85074e+08	1.40302e+08	1.73e+08	458999702	365704278	429725262	3.68196e+08	397995447	4.75917e+08	3.01212e+08	346880183		1.74967e+08	4.05656e+08	3.80501e+08	2.2424e+07	4.00757e+07	6.48602e+07		2.31847	0.000127324	2.1747	0.00203964	0.937989	0.588436
P15532	Nucleoside diphosphate kinase A OS=Mus musculus GN=Nme1 PE=1 SV=1 - [NDKA_MOUSE]	152	17.1969	7.37158	1.66364e+08	1.78904e+08	1.36034e+08	7.81891e+07	5.38706e+08	2.55055e+08	568554427	6.01732e+08	5.73334e+08	4.23441e+08	3.14356e+08	4.34155e+08		1.39873e+08	4.91012e+08	4.36321e+08	3.88742e+07	1.38042e+08	9.19495e+07		3.51042	0.00543447	3.11942	0.0021289	0.888617	0.588658
P97494	Glutamate--cysteine ligase catalytic subunit OS=Mus musculus GN=Gclc PE=1 SV=4 - [GSH1_MOUSE]	637	72.5251	5.89697	1.90243e+08	5.87402e+07	6.83221e+07	1.11995e+08	1.16258e+09	1.50587e+09	1.38361e+09	1.23498e+09	1.14938e+09	1.27302e+09	9.71544e+08	1.56165e+09		1.07325e+08	1.32176e+09	1.2389e+09	5.19108e+07	1.32845e+08	2.14958e+08		12.3155	6.10771e-06	11.5434	0.000114768	0.937313	0.590684
P35979	60S ribosomal protein L12 OS=Mus musculus GN=Rpl12 PE=1 SV=2 - [RL12_MOUSE]	165	17.7935	9.42236	3.46386e+08	2.32912e+08	2.98799e+08	3.56338e+08	6.3278e+08	4.86941e+08	6.80243e+08	5.30271e+08	5.99137e+08	7.86299e+08	6.11221e+08	5.0178e+08		3.08609e+08	5.82558e+08	6.24609e+08	4.88148e+07	7.73648e+07	1.02541e+08		1.88769	0.00204043	2.02395	0.00294182	1.07218	0.591271
Q80XN0	D-beta-hydroxybutyrate dehydrogenase, mitochondrial OS=Mus musculus GN=Bdh1 PE=1 SV=2 - [BDH_MOUSE]	343	38.2744	9.01221	6.60024e+08	3.45582e+08	3.34358e+08	3.65793e+08	1.14931e+09	1.04705e+09	1.2756e+09	9.15958e+08	1.21848e+09	1.15375e+09	9.01451e+08	1.40196e+09		4.26439e+08	1.09698e+09	1.16891e+09	1.3533e+08	1.32197e+08	1.79257e+08		2.57242	0.000854976	2.7411	0.00123128	1.06557	0.596162
P35564	Calnexin OS=Mus musculus GN=Canx PE=1 SV=1 - [CALX_MOUSE]	591	67.2357	4.64014	2.48102e+08	2.60132e+08	2.5108e+08	2.30278e+08	3.18022e+08	2.66226e+08	2.75827e+08	3.64499e+08	2.58521e+08	3.25687e+08	2.6643e+08	5.18153e+08		2.47398e+08	3.06144e+08	3.42198e+08	1.08319e+07	3.89198e+07	1.04852e+08		1.23745	0.0453701	1.38319	0.170311	1.11777	0.596806
O70475	UDP-glucose 6-dehydrogenase OS=Mus musculus GN=Ugdh PE=1 SV=1 - [UGDH_MOUSE]	493	54.7973	7.56201	3.26024e+08	4.61777e+08	4.27066e+08	1.93085e+08	1.59687e+09	1.92829e+09	1788428821	1.77975e+09	2.16416e+09	1.94125e+09	1.13835e+09	2.51725e+09		3.51988e+08	1.77333e+09	1.94025e+09	1.04421e+08	1.17709e+08	5.06485e+08		5.03805	4.31845e-06	5.51226	0.00179589	1.09413	0.598321
P50285	Dimethylaniline monooxygenase [N-oxide-forming] 1 OS=Mus musculus GN=Fmo1 PE=1 SV=1 - [FMO1_MOUSE]	532	59.876	8.47021	7.55621e+07	7.6131e+07	8.75563e+07	3.43756e+07	2.30865e+08	2.58642e+08	2.71884e+08	2.16325e+08	2.53372e+08	3.70723e+08	7.8081e+07	1.32067e+08		6.84062e+07	2.44429e+08	2.08561e+08	2.02218e+07	2.19634e+07	1.13116e+08		3.5732	5.13803e-05	3.04885	0.0790908	0.853256	0.609187
Q9D379	Epoxide hydrolase 1 OS=Mus musculus GN=Ephx1 PE=1 SV=2 - [HYEP_MOUSE]	455	52.543	8.35303	5.02075e+08	5.37728e+08	5.13244e+08	6.65513e+08	2.20083e+09	2.36469e+09	2.46144e+09	1.33707e+09	3425035951	1.18982e+09	1.62408e+09	3.53501e+09		5.5464e+08	2.09101e+09	2.44349e+09	6.52984e+07	4.45144e+08	1.04856e+09		3.77003	0.00103966	4.40554	0.0207422	1.16857	0.611273
Q9D819	Inorganic pyrophosphatase OS=Mus musculus GN=Ppa1 PE=1 SV=1 - [IPYR_MOUSE]	289	32.6462	5.60498	2.75552e+08	1.14926e+08	2.4499e+08	1.1915e+08	6.88791e+08	5.91456e+08	4.74035e+08	6.1797e+08	6.19317e+08	1.26561e+09	4.69464e+08	4.34109e+08		1.88655e+08	5.93063e+08	6.97124e+08	7.24425e+07	7.73861e+07	3.35498e+08		3.14364	0.000577955	3.69524	0.0425688	1.17546	0.619399
Q921G7	Electron transfer flavoprotein-ubiquinone oxidoreductase, mitochondrial OS=Mus musculus GN=Etfdh PE=1 SV=1 - [ETFD_MOUSE]	616	68.0476	7.57666	6.06278e+08	3.40327e+08	5.12822e+08	4.70018e+08	7.85608e+08	6.076e+08	6.17901e+08	6.91198e+08	6.61349e+08	9.65376e+08	5.73268e+08	6.98336e+08		4.82361e+08	6.75577e+08	7.24582e+08	9.56676e+07	7.12358e+07	1.46258e+08		1.40056	0.0309287	1.50216	0.0532541	1.07254	0.620538
P13707	Glycerol-3-phosphate dehydrogenase [NAD(+)], cytoplasmic OS=Mus musculus GN=Gpd1 PE=1 SV=3 - [GPDA_MOUSE]	349	37.5484	7.1665	5.95943e+08	9.16321e+08	9.04808e+08	1.09486e+09	4.72762e+08	3.12792e+08	5.64113e+08	6.32598e+08	7.27367e+08	3.05812e+08	4.63065e+08	7.52343e+08		8.77982e+08	4.95566e+08	5.62147e+08	1.79423e+08	1.19795e+08	1.86412e+08		0.564438	0.0219363	0.640271	0.0788993	1.13435	0.6214
Q9WTP7	GTP:AMP phosphotransferase AK3, mitochondrial OS=Mus musculus GN=Ak3 PE=1 SV=3 - [KAD3_MOUSE]	227	25.4105	8.83643	3.43281e+08	3.2673e+08	3.7667e+08	3.6104e+08	5.15922e+08	4.94538e+08	7.10711e+08	6.80705e+08	5.49873e+08	6.81913e+08	4.8724e+08	5.39147e+08		3.5193e+08	6.00469e+08	5.64543e+08	1.87413e+07	9.61257e+07	7.17837e+07		1.70622	0.00459034	1.60413	0.00254282	0.94017	0.622556
Q8QZR5	Alanine aminotransferase 1 OS=Mus musculus GN=Gpt PE=1 SV=3 - [ALAT1_MOUSE]	496	55.107	6.63916	1.92782e+08	2.05301e+08	2.73602e+08	2.5997e+08	6.95014e+08	7.01203e+08	6.2768e+08	5.57538e+08	7.07455e+08	1.71705e+09	2.79791e+08	5.29281e+08		2.32914e+08	6.45358e+08	8.08395e+08	3.44985e+07	5.83294e+07	5.46163e+08		2.77081	4.28441e-05	3.4708	0.118391	1.25263	0.62555
Q91VD9	NADH-ubiquinone oxidoreductase 75 kDa subunit, mitochondrial OS=Mus musculus GN=Ndufs1 PE=1 SV=2 - [NDUS1_MOUSE]	727	79.7256	5.71924	1.00289e+08	1.32927e+08	1.23037e+08	7.5474e+07	4.3029e+08	3.47907e+08	3.11855e+08	4.02483e+08	4.23699e+08	6.91537e+08	2.26796e+08	3.56675e+08		1.07932e+08	3.73134e+08	4.24677e+08	2.21632e+07	4.61509e+07	1.69556e+08		3.45713	0.00010713	3.93468	0.0184057	1.13814	0.629556
Q99LC3	NADH dehydrogenase [ubiquinone] 1 alpha subcomplex subunit 10, mitochondrial OS=Mus musculus GN=Ndufa10 PE=1 SV=1 - [NDUAA_MOUSE]	355	40.5777	7.78174	2.10206e+08	2.02752e+08	1.79469e+08	1.38918e+08	2.85302e+08	2.18801e+08	3.35524e+08	2.27517e+08	3.0999e+08	2.17212e+08	3.38191e+08	2.77598e+08		1.82836e+08	2.66786e+08	2.85748e+08	2.77755e+07	4.72028e+07	4.50043e+07		1.45915	0.0377799	1.56286	0.0150339	1.07107	0.632508
P16331	Phenylalanine-4-hydroxylase OS=Mus musculus GN=Pah PE=1 SV=4 - [PH4H_MOUSE]	453	51.8674	6.30322	1.5126e+09	6.50508e+08	9.4764e+08	6.2465e+08	3.83182e+09	3.57971e+09	4.65506e+09	4.57713e+09	2.90613e+09	6.17477e+09	3.23712e+09	2.58427e+09		9.3385e+08	4.16093e+09	3.72557e+09	3.57433e+08	4.64626e+08	1.43276e+09		4.45567	7.5938e-05	3.98948	0.016938	0.895371	0.634462
Q62425	Cytochrome c oxidase subunit NDUFA4 OS=Mus musculus GN=Ndufa4 PE=1 SV=2 - [NDUA4_MOUSE]	82	9.32087	9.5249	5.07245e+08	1.73348e+06	1.94e+08	2.93183e+08	1.03012e+09	4.00641e+08	1.10214e+09	1.03515e+09	9.86833e+08	1.33643e+09	1.50963e+08	4.72459e+08		2.49041e+08	8.92012e+08	7.3667e+08	1.82214e+08	2.85114e+08	4.56932e+08		3.58179	0.0165873	2.95803	0.136803	0.825852	0.635169
P29391	Ferritin light chain 1 OS=Mus musculus GN=Ftl1 PE=1 SV=2 - [FRIL1_MOUSE]	183	20.7895	5.99854	5.6196e+08	1.93752e+08	2.94756e+08	2.22489e+08	1.86666e+09	2840832492	2630895769	1.83388e+09	2.10323e+09	3.13928e+09	2.40721e+09	2.21681e+09		3.18239e+08	2.29306e+09	2.46663e+09	1.45444e+08	4.49127e+08	4.03255e+08		7.20547	0.000351054	7.75087	0.000129016	1.07569	0.636166
O35423	Serine--pyruvate aminotransferase, mitochondrial OS=Mus musculus GN=Agxt PE=1 SV=3 - [SPYA_MOUSE]	414	45.8828	8.17725	2.00459e+08	1.29317e+08	1.62376e+08	1.43503e+08	1.11964e+09	8.14099e+08	9.12732e+08	2.03833e+09	6.54641e+08	2.22176e+09	5.25706e+08	4.80956e+08		1.58914e+08	1.2212e+09	9.70766e+08	2.66994e+07	4.84485e+08	7.25073e+08		7.68467	0.00905261	6.10876	0.100716	0.794928	0.636599
Q91X44	Glucokinase regulatory protein OS=Mus musculus GN=Gckr PE=1 SV=3 - [GCKR_MOUSE]	587	64.6385	6.66846	9.41742e+07	4.56396e+07	7.80769e+07	4.77687e+07	2.10739e+08	2.07026e+08	2.21332e+08	1.87099e+08	8.52025e+07	1.73945e+08	2.79335e+08	2.07884e+08		6.64148e+07	2.06549e+08	1.86592e+08	2.05297e+07	1.23959e+07	6.98112e+07		3.10998	5.4079e-05	2.80949	0.0287819	0.903378	0.64319
P97823	Acyl-protein thioesterase 1 OS=Mus musculus GN=Lypla1 PE=1 SV=1 - [LYPA1_MOUSE]	230	24.6714	6.62451	6.01173e+07	2.03781e+07	2.56507e+07	1.25509e+07	2.0217e+08	2.09181e+08	1.04134e+08	4.21474e+07	2.49923e+08	3.1594e+07	1.12249e+08	3.76525e+07		2.96743e+07	1.39408e+08	1.07854e+08	1.81837e+07	6.98411e+07	8.79583e+07		4.69794	0.0388727	3.63461	0.182376	0.77366	0.643803
P26443	Glutamate dehydrogenase 1, mitochondrial OS=Mus musculus GN=Glud1 PE=1 SV=1 - [DHE3_MOUSE]	558	61.2982	8.00146	3.80869e+09	2.47051e+09	3.35263e+09	2.85337e+09	5.58419e+09	7.25912e+09	7.36112e+09	4.9247e+09	7.27655e+09	6.6027e+09	3.9854e+09	5.43605e+09		3.1213e+09	6.28228e+09	5.82517e+09	5.05302e+08	1.05457e+09	1.24972e+09		2.01271	0.00338902	1.86627	0.0132359	0.927238	0.645424
P20108	Thioredoxin-dependent peroxide reductase, mitochondrial OS=Mus musculus GN=Prdx3 PE=1 SV=1 - [PRDX3_MOUSE]	257	28.1094	7.57666	1.42533e+08	2.97555e+08	2.88719e+08	3.51924e+08	5.37527e+08	5.1667e+08	5.8196e+08	5.93752e+08	4.95498e+08	6.88805e+08	4.59918e+08	4.78235e+08		2.70183e+08	5.57477e+08	5.30614e+08	7.75706e+07	3.15376e+07	9.21942e+07		2.06333	0.00101442	1.96391	0.0095792	0.951812	0.649891
P19783	Cytochrome c oxidase subunit 4 isoform 1, mitochondrial OS=Mus musculus GN=Cox4i1 PE=1 SV=2 - [COX41_MOUSE]	169	19.5179	9.23193	4.93585e+07	1.94691e+08	6.08881e+07	1.24869e+08	2.19306e+08	3.91796e+08	2.61837e+08	1.8875e+08	2.04298e+08	7.86507e+08	1.28943e+08	2.40702e+08		1.07452e+08	2.65422e+08	3.40113e+08	5.80021e+07	7.74411e+07	2.60858e+08		2.47015	0.0300399	3.16526	0.182283	1.2814	0.651299
Q64105	Sepiapterin reductase OS=Mus musculus GN=Spr PE=1 SV=1 - [SPRE_MOUSE]	261	27.8654	5.74463	2.1272e+08	1.98397e+08	2.25631e+08	1.64813e+08	2.89693e+08	3.4444e+08	3.20617e+08	3.07212e+08	2.98382e+08	3.07604e+08	3.2804e+08	3.62418e+08		2.0039e+08	3.15491e+08	3.24111e+08	2.26874e+07	1.99901e+07	2.45833e+07		1.57438	0.000584956	1.6174	0.000682326	1.02732	0.654128
P51881	ADP/ATP translocase 2 OS=Mus musculus GN=Slc25a5 PE=1 SV=3 - [ADT2_MOUSE]	298	32.9102	9.72998	1.56396e+09	9.55793e+08	9.27735e+08	1.01043e+09	2.52481e+09	2.72532e+09	2.84876e+09	2.69233e+09	2.75311e+09	3.31405e+09	1.92728e+09	3.44827e+09		1.11448e+09	2.69781e+09	2.86068e+09	2.61205e+08	1.15652e+08	5.98669e+08		2.42069	7.306e-05	2.56683	0.00357584	1.06037	0.659909
Q8BG32	26S proteasome non-ATPase regulatory subunit 11 OS=Mus musculus GN=Psmd11 PE=1 SV=3 - [PSD11_MOUSE]	422	47.407	6.48096	3.06734e+07	1.9573e+07	3.81111e+07	2.15575e+07	6.96033e+07	4.30384e+07	5.41359e+07	4.67569e+07	4.30643e+07	4.79579e+07	5.57355e+07	8.85647e+07		2.74788e+07	5.33836e+07	5.88306e+07	7.42989e+06	1.01806e+07	1.77517e+07		1.94272	0.011927	2.14095	0.0302808	1.10203	0.661017
Q9DBB8	Trans-1,2-dihydrobenzene-1,2-diol dehydrogenase OS=Mus musculus GN=Dhdh PE=1 SV=1 - [DHDH_MOUSE]	333	36.2777	6.44287	2.9563e+08	1.65589e+08	2.07215e+08	2.53017e+08	4.07748e+08	3.63932e+08	4.38531e+08	6.32776e+08	3.65676e+08	5.48035e+08	3.92671e+08	4.09326e+08		2.30363e+08	4.60747e+08	4.28927e+08	4.87457e+07	1.02798e+08	7.05088e+07		2.00009	0.0127113	1.86196	0.00702041	0.930938	0.673885
Q8VCC2	Liver carboxylesterase 1 OS=Mus musculus GN=Ces1 PE=1 SV=1 - [EST1_MOUSE]	565	62.64	5.99854	2.79609e+08	1.17273e+08	1.76159e+08	1.00176e+08	6.07707e+08	5.44679e+08	3.46628e+08	3.25211e+08	6.32223e+08	3.84247e+08	5.01587e+08	5.41811e+07		1.68304e+08	4.56056e+08	3.9306e+08	7.01715e+07	1.2242e+08	2.14414e+08		2.70971	0.0123361	2.33541	0.135187	0.861867	0.674023
Q78PY7	Staphylococcal nuclease domain-containing protein 1 OS=Mus musculus GN=Snd1 PE=1 SV=1 - [SND1_MOUSE]	910	102.025	7.43018	1.65558e+08	1.16359e+08	1.73462e+08	1.99963e+08	1.95241e+08	3.04704e+08	2.29695e+08	2.77083e+08	2.85862e+08	2.83255e+08	1.88531e+08	1.82689e+08		1.63835e+08	2.51681e+08	2.35084e+08	3.02278e+07	4.22066e+07	4.9526e+07		1.53618	0.0262586	1.43488	0.0775397	0.934058	0.674142
Q99020	Heterogeneous nuclear ribonucleoprotein A/B OS=Mus musculus GN=Hnrnpab PE=1 SV=1 - [ROAA_MOUSE]	285	30.8123	7.91357	4.63252e+07	3.25061e+07	3.20492e+07	9.49388e+07	1.58636e+08	1.43686e+08	1.67947e+08	1.25506e+08	1.54847e+08	2.75558e+08	1.16757e+08	1.17001e+08		5.14548e+07	1.48944e+08	1.66041e+08	2.57527e+07	1.60625e+07	6.51021e+07		2.89465	0.00142831	3.22693	0.0297679	1.11479	0.674231
P63038	60 kDa heat shock protein, mitochondrial OS=Mus musculus GN=Hspd1 PE=1 SV=1 - [CH60_MOUSE]	573	60.9174	6.17627	3.36972e+09	3.31554e+09	4.93016e+09	4.55185e+09	6.5453e+09	6.8524e+09	7.52435e+09	7.15904e+09	5.32551e+09	8.43494e+09	5.83245e+09	7.217e+09		4.04182e+09	7.02027e+09	6.70247e+09	7.12126e+08	3.63021e+08	1.21646e+09		1.73691	0.000655598	1.65828	0.0170482	0.954731	0.679735
Q9D023	Mitochondrial pyruvate carrier 2 OS=Mus musculus GN=Mpc2 PE=1 SV=1 - [MPC2_MOUSE]	127	14.2766	10.6089	9.07124e+07	6.34272e+07	5.51619e+07	2.2919e+07	1.50589e+08	2.16901e+08	1.51742e+08	7.96456e+07	1.50546e+08	2.20148e+08	7.10432e+07	8.1091e+07		5.80551e+07	1.49719e+08	1.30707e+08	2.41779e+07	4.85504e+07	6.00309e+07		2.57892	0.026381	2.25143	0.0998283	0.873014	0.684606
P17563	Selenium-binding protein 1 OS=Mus musculus GN=Selenbp1 PE=1 SV=2 - [SBP1_MOUSE]	472	52.4804	6.29053	8.96988e+07	4.07744e+07	1.77997e+08	4.78081e+07	352132043	344057382	1.9868e+08	3.77884e+08	1.49648e+08	400417968	484583217	3.77257e+08		8.90695e+07	3.18188e+08	3.52976e+08	5.46429e+07	7.012e+07	1.23999e+08		3.57236	0.00426423	3.96293	0.0149811	1.10933	0.687048
Q8JZR0	Long-chain-fatty-acid--CoA ligase 5 OS=Mus musculus GN=Acsl5 PE=1 SV=1 - [ACSL5_MOUSE]	683	76.1575	7.09326	1.12657e+08	1.46555e+08	2.14612e+08	4.3213e+07	4.87186e+08	6.66535e+08	8.0578e+08	4.47014e+08	5.35125e+08	5.57094e+08	4.63972e+08	6.89619e+08		1.29259e+08	6.01629e+08	5.61453e+08	6.17736e+07	1.43956e+08	8.16107e+07		4.65444	0.00197068	4.34362	0.000333526	0.933221	0.688754
Q03265	ATP synthase subunit alpha, mitochondrial OS=Mus musculus GN=Atp5a1 PE=1 SV=1 - [ATPA_MOUSE]	553	59.7156	9.18799	6.20109e+09	6.1921e+09	7.08619e+09	7.05151e+09	8.9377e+09	9.54123e+09	1.12859e+10	9.66556e+09	8.83398e+09	1.44154e+10	8.06479e+09	1.06049e+10		6.63272e+09	9.8576e+09	1.04798e+10	4.36312e+08	8.69383e+08	2.45182e+09		1.48621	0.00121285	1.58001	0.0367488	1.06311	0.693098
Q8VBW8	Tetratricopeptide repeat protein 36 OS=Mus musculus GN=Ttc36 PE=1 SV=1 - [TTC36_MOUSE]	186	20.1202	5.2876	1.69479e+08	1.15034e+08	1.69382e+08	1.50936e+08	3.04053e+08	2.97348e+08	2.97886e+08	3.06218e+08	2.71361e+08	5.37106e+08	1.30468e+08	1.01957e+08		1.51208e+08	3.01376e+08	2.60223e+08	2.22079e+07	3.84115e+06	1.72245e+08		1.99313	2.54477e-05	1.72097	0.318669	0.863448	0.693456
Q64374	Regucalcin OS=Mus musculus GN=Rgn PE=1 SV=1 - [RGN_MOUSE]	299	33.3855	5.33838	3.67158e+09	3.38717e+09	4.79785e+09	2.29439e+09	1.06213e+10	1.64938e+10	8.7311e+09	7.33323e+09	1.19259e+10	7.43634e+09	6.64293e+09	1.29565e+10		3.53775e+09	1.07949e+10	9.74043e+09	8.90838e+08	3.49107e+09	2.73966e+09		3.05133	0.0130035	2.75328	0.0097456	0.902322	0.694971
Q60597	2-oxoglutarate dehydrogenase, mitochondrial OS=Mus musculus GN=Ogdh PE=1 SV=3 - [ODO1_MOUSE]	1023	116.375	6.82959	1.63412e+08	1.48773e+08	1.68118e+08	1.02406e+08	2.81244e+08	3.1407e+08	3.26025e+08	4.62086e+08	2.45413e+08	4.91374e+08	3.11062e+08	4.47685e+08		1.45677e+08	3.45856e+08	3.73883e+08	2.5981e+07	6.90794e+07	9.96267e+07		2.37413	0.0033335	2.56652	0.0085683	1.08104	0.702714
Q4LDG0	Bile acyl-CoA synthetase OS=Mus musculus GN=Slc27a5 PE=1 SV=2 - [S27A5_MOUSE]	689	76.154	8.38232	9.75214e+07	2.24808e+08	2.70503e+08	2.87763e+08	3.74404e+08	3.11757e+08	3.01254e+08	4.0276e+08	2.61114e+08	5.74822e+08	3.77228e+08	2.95751e+08		2.20149e+08	3.47544e+08	3.77229e+08	7.4442e+07	4.24081e+07	1.21619e+08		1.57868	0.0420226	1.71352	0.104995	1.08541	0.703572
O88668	Protein CREG1 OS=Mus musculus GN=Creg1 PE=1 SV=1 - [CREG1_MOUSE]	220	24.4364	6.41748	3.10216e+07	2.20264e+07	3.66098e+07	2.27854e+07	5.00585e+07	3.95168e+07	7.87466e+07	5.17062e+07	4.90948e+07	4.51631e+07	5.39831e+07	9.29189e+07		2.81108e+07	5.5007e+07	6.029e+07	6.04329e+06	1.44819e+07	1.90957e+07		1.95679	0.0249994	2.14473	0.0318811	1.09604	0.715761
Q8K2C9	Very-long-chain (3R)-3-hydroxyacyl-CoA dehydratase 3 OS=Mus musculus GN=Hacd3 PE=1 SV=2 - [HACD3_MOUSE]	362	43.1034	9.12939	5.73534e+07	1.30011e+06	1.30011e+06	1.30011e+06	8.96545e+07	8.84683e+07	1.05605e+08	9.80756e+07	1.18436e+08	3.22159e+07	1.30011e+06	1.70234e+08		1.53134e+07	9.54509e+07	8.05464e+07	2.42718e+07	6.93453e+06	6.72593e+07		6.23315	0.00151678	5.25985	0.165159	0.843852	0.71577
Q7TNG8	Probable D-lactate dehydrogenase, mitochondrial OS=Mus musculus GN=Ldhd PE=1 SV=1 - [LDHD_MOUSE]	484	51.8152	6.62451	1.70321e+07	4.38698e+07	1.72175e+08	6.21068e+07	1.92593e+08	1.45826e+08	1.94302e+08	1.42789e+08	1.99322e+08	1.87309e+08	1.07958e+08	1.42438e+08		7.3796e+07	1.68878e+08	1.59257e+08	5.90188e+07	2.46009e+07	3.64233e+07		2.28844	0.0420168	2.15807	0.0767495	0.94303	0.717645
P09528	Ferritin heavy chain OS=Mus musculus GN=Fth1 PE=1 SV=2 - [FRIH_MOUSE]	182	21.0533	5.88428	8.7479e+07	3.72034e+07	2.94129e+07	1.22817e+08	3.31511e+08	4.69293e+08	3.79637e+08	2.09479e+08	7.55802e+07	6.7051e+08	1.72857e+08	2.59033e+08		6.92282e+07	3.4748e+08	2.94495e+08	3.81305e+07	9.37707e+07	2.26585e+08		5.01934	0.00312302	4.25398	0.140408	0.847517	0.721094
Q8BWQ1	UDP-glucuronosyltransferase 2A3 OS=Mus musculus GN=Ugt2a3 PE=1 SV=1 - [UD2A3_MOUSE]	534	61.0793	7.92822	6.57506e+08	6.89867e+08	5.52549e+08	5.04277e+08	1.98529e+08	4.52089e+08	4.95475e+08	3.986e+08	3.70307e+08	3.27085e+08	1.54815e+08	5.40916e+08		6.0105e+08	3.86173e+08	3.48281e+08	7.54868e+07	1.13641e+08	1.37361e+08		0.642498	0.034276	0.579454	0.0314408	0.901876	0.725399
Q9WUU7	Cathepsin Z OS=Mus musculus GN=Ctsz PE=1 SV=1 - [CATZ_MOUSE]	306	33.9742	6.59521	1.30011e+06	1.58647e+07	1.30011e+06	3.02968e+07	7.07521e+07	3.75951e+07	5.12539e+07	4.03974e+07	1.30011e+06	2.35443e+08	4.41459e+07	1.30011e+06		1.21904e+07	4.99996e+07	7.05473e+07	1.20264e+07	1.30222e+07	9.67962e+07		4.10156	0.0101553	5.78712	0.340028	1.41096	0.728062
P61458	Pterin-4-alpha-carbinolamine dehydratase OS=Mus musculus GN=Pcbd1 PE=1 SV=2 - [PHS_MOUSE]	104	11.978	6.80029	3.57234e+08	3.57678e+08	4.22013e+08	4.26445e+08	9.07312e+08	1.02086e+09	1.01622e+09	5.17547e+08	9.22597e+08	1.07162e+09	5.80785e+08	6.45636e+08		3.90843e+08	8.65486e+08	8.0516e+08	3.34239e+07	2.05957e+08	2.00365e+08		2.21441	0.00762387	2.06006	0.0123268	0.930298	0.728597
Q9CRB3	5-hydroxyisourate hydrolase OS=Mus musculus GN=Urah PE=1 SV=1 - [HIUH_MOUSE]	118	13.5508	7.86963	6.19877e+07	1.73348e+06	2.09156e+08	1.73348e+06	4.50703e+08	5.5513e+08	3.71052e+08	3.31441e+08	5.32417e+08	6.63381e+08	1.81855e+08	1.27101e+08		6.86526e+07	4.27081e+08	3.76189e+08	8.47671e+07	8.54995e+07	2.2732e+08		6.22091	0.00210213	5.4796	0.070531	0.880836	0.729086
Q8BWT1	3-ketoacyl-CoA thiolase, mitochondrial OS=Mus musculus GN=Acaa2 PE=1 SV=3 - [THIM_MOUSE]	397	41.8034	8.08936	4.06529e+09	4.30573e+09	4.75431e+09	5.2968e+09	5.97733e+09	6.71052e+09	7.29228e+09	4.76999e+09	5.63553e+09	7.65232e+09	6.34135e+09	6.11984e+09		4.60553e+09	6.18753e+09	6.43726e+09	4.69504e+08	9.41753e+08	7.46509e+08		1.3435	0.040449	1.39772	0.0113993	1.04036	0.731226
P07724	Serum albumin OS=Mus musculus GN=Alb PE=1 SV=3 - [ALBU_MOUSE]	608	68.6477	6.07471	9.37712e+09	5.79793e+09	7.70158e+09	6.10438e+09	1.42111e+10	1.18114e+10	1.74487e+10	1.14446e+10	1.12168e+10	1.8028e+10	1.0984e+10	1.1557e+10		7.24525e+09	1.3729e+10	1.29464e+10	1.42736e+09	2.39605e+09	2.94089e+09		1.89489	0.00690687	1.78689	0.0233743	0.943003	0.733105
Q91VR2	ATP synthase subunit gamma, mitochondrial OS=Mus musculus GN=Atp5c1 PE=1 SV=1 - [ATPG_MOUSE]	298	32.8651	9.01221	5.07163e+08	5.61076e+08	7.91149e+08	6.70085e+08	8.19799e+08	1.28812e+09	1.0721e+09	8.29221e+08	5.78387e+08	1.52962e+09	7.03964e+08	8.56897e+08		6.32368e+08	1.00231e+09	9.17217e+08	1.0885e+08	1.93537e+08	3.67069e+08		1.58501	0.0278503	1.45045	0.244983	0.915104	0.734613
P20029	78 kDa glucose-regulated protein OS=Mus musculus GN=Hspa5 PE=1 SV=3 - [GRP78_MOUSE]	655	72.3775	5.16064	1.56987e+09	1.4797e+09	1.40729e+09	1.80256e+09	2.32123e+09	2.02177e+09	2.19585e+09	2.72959e+09	2.3184e+09	3.05147e+09	1.44507e+09	1.92775e+09		1.56486e+09	2.31711e+09	2.18567e+09	1.48835e+08	2.60807e+08	5.87843e+08		1.48072	0.00488064	1.39672	0.126553	0.943275	0.735449
Q64471	Glutathione S-transferase theta-1 OS=Mus musculus GN=Gstt1 PE=1 SV=4 - [GSTT1_MOUSE]	240	27.3563	7.26904	6.92676e+07	2.20494e+08	2.31854e+08	1.3364e+08	2.61265e+08	3.11847e+08	3.01266e+08	2.96263e+08	2.21424e+08	5.39074e+08	1.10047e+08	1.65136e+08		1.63814e+08	2.9266e+08	2.5892e+08	6.65047e+07	1.8979e+07	1.66471e+08		1.78654	0.0179815	1.58058	0.393579	0.884713	0.739163
P17751	Triosephosphate isomerase OS=Mus musculus GN=Tpi1 PE=1 SV=4 - [TPIS_MOUSE]	299	32.1713	5.74463	1.56641e+09	1.56956e+09	1.84085e+09	1.47229e+09	2.91695e+09	2.84284e+09	3.73059e+09	3.25924e+09	2.93026e+09	3.08657e+09	3.22081e+09	3.92134e+09		1.61228e+09	3.18741e+09	3.28974e+09	1.37632e+08	3.50744e+08	3.78871e+08		1.97696	0.000352277	2.04043	0.000361156	1.03211	0.743066
P50544	Very long-chain specific acyl-CoA dehydrogenase, mitochondrial OS=Mus musculus GN=Acadvl PE=1 SV=3 - [ACADV_MOUSE]	656	70.8307	8.74854	4.74088e+08	3.49006e+08	3.74748e+08	6.98362e+08	7.82481e+08	6.78691e+08	7.19311e+08	8.39777e+08	7.10889e+08	1.11244e+09	5.95946e+08	7.60907e+08		4.74051e+08	7.55065e+08	7.95046e+08	1.3767e+08	6.13172e+07	1.92762e+08		1.59279	0.0179189	1.67713	0.0572826	1.05295	0.743767
Q9D6Y9	1,4-alpha-glucan-branching enzyme OS=Mus musculus GN=Gbe1 PE=1 SV=1 - [GLGB_MOUSE]	702	80.3126	6.43018	1.91526e+08	9.85017e+07	1.21367e+08	7.89522e+07	2.66709e+08	5.04498e+08	3.99232e+08	1.60808e+08	2.81305e+08	8.6477e+07	3.44596e+08	4.72194e+08		1.22587e+08	3.32812e+08	2.96143e+08	4.25388e+07	1.30233e+08	1.39213e+08		2.71491	0.0376382	2.41578	0.084461	0.889821	0.750344
Q9DCS9	NADH dehydrogenase [ubiquinone] 1 beta subcomplex subunit 10 OS=Mus musculus GN=Ndufb10 PE=1 SV=3 - [NDUBA_MOUSE]	176	21.0104	8.03076	866739	5.97489e+07	5.82362e+07	2.36098e+07	6.4661e+07	7.7536e+07	8.86086e+07	8.86366e+07	7.03265e+07	8.58545e+07	6.95407e+07	8.42383e+07		3.56154e+07	7.98606e+07	7.749e+07	2.47271e+07	9.87392e+06	7.58304e+06		2.2423	0.0281226	2.17574	0.0309892	0.970316	0.752762
P63101	14-3-3 protein zeta/delta OS=Mus musculus GN=Ywhaz PE=1 SV=1 - [1433Z_MOUSE]	245	27.7537	4.79248	4.28761e+08	5.02469e+08	5.13101e+08	5.3086e+08	6.30537e+08	6.04574e+08	7.20048e+08	9.10138e+08	7.28188e+08	6.29483e+08	6.47446e+08	1.00356e+09		4.93798e+08	7.16324e+08	7.52169e+08	3.88945e+07	1.19818e+08	1.49826e+08		1.45064	0.0222362	1.52323	0.0276555	1.05004	0.757206
Q9QYJ0	DnaJ homolog subfamily A member 2 OS=Mus musculus GN=Dnaja2 PE=1 SV=1 - [DNJA2_MOUSE]	412	45.7166	6.48096	1.30011e+06	1.30011e+06	1.30011e+06	1.90128e+07	3.08315e+07	6.22554e+07	3.73212e+07	7.42951e+07	6.26456e+07	3.33129e+07	3.69347e+07	5.57475e+07		5.72827e+06	5.11758e+07	4.71602e+07	7.6698e+06	1.77701e+07	1.23476e+07		8.9339	0.00659726	8.23288	0.00261193	0.921533	0.75879
Q91VA0	Acyl-coenzyme A synthetase ACSM1, mitochondrial OS=Mus musculus GN=Acsm1 PE=1 SV=1 - [ACSM1_MOUSE]	573	64.719	7.1665	1.22659e+09	6.09385e+08	9.47451e+08	5.30412e+08	1.87796e+09	1.54581e+09	1.96796e+09	1.20442e+09	1.17624e+09	1.58668e+09	1.51017e+09	2.00989e+09		828458998	1.64904e+09	1.57075e+09	2.78159e+08	3.01022e+08	2.96817e+08		1.99049	0.013341	1.89599	0.0195503	0.952523	0.759262
Q9R1P0	Proteasome subunit alpha type-4 OS=Mus musculus GN=Psma4 PE=1 SV=1 - [PSA4_MOUSE]	261	29.4522	7.72314	8.43934e+07	7.55416e+07	7.16683e+07	8.39608e+07	177676648	1.52383e+08	1.8082e+08	1.49757e+08	126776064	1.46836e+08	1.82722e+08	1.83826e+08		7.8891e+07	1.65159e+08	1.6004e+08	5.46272e+06	1.41635e+07	2.42957e+07		2.09351	6.33852e-05	2.02862	0.00132593	0.969005	0.763227
P07901	Heat shock protein HSP 90-alpha OS=Mus musculus GN=Hsp90aa1 PE=1 SV=4 - [HS90A_MOUSE]	733	84.7348	5.0083	7.21812e+07	1.5453e+08	9.54823e+07	1.52844e+08	2.10169e+08	2.76521e+08	3.21005e+08	1.99854e+08	3.5588e+08	1.78283e+08	7.40213e+07	5.26651e+08		1.18759e+08	2.51887e+08	2.83709e+08	3.5891e+07	4.95778e+07	1.72708e+08		2.12099	0.00931743	2.38894	0.156438	1.12633	0.769405
Q9Z2I8	Succinyl-CoA ligase [GDP-forming] subunit beta, mitochondrial OS=Mus musculus GN=Suclg2 PE=1 SV=3 - [SUCB2_MOUSE]	433	46.8107	7.02002	6.81587e+08	4.51532e+08	7.35936e+08	5.93343e+08	8.69689e+08	1.21414e+09	1.09214e+09	1.29841e+09	8.84148e+08	1.95514e+09	1.0824e+09	8.848e+08		6.15599e+08	1.11859e+09	1.20162e+09	1.07528e+08	1.61335e+08	4.42485e+08		1.81708	0.00413256	1.95195	0.0673553	1.07422	0.770426
Q9DCX2	ATP synthase subunit d, mitochondrial OS=Mus musculus GN=Atp5h PE=1 SV=3 - [ATP5H_MOUSE]	161	18.7376	5.69385	4.88837e+08	6.24849e+08	5.87506e+08	4.73305e+08	7.00191e+08	8.96099e+08	6.61192e+08	6.37258e+08	6.18564e+08	1.02168e+09	4.75155e+08	6.25757e+08		5.43624e+08	7.23685e+08	6.8529e+08	6.4167e+07	1.02046e+08	2.03294e+08		1.33122	0.0413658	1.26059	0.293526	0.946944	0.779857
P00493	Hypoxanthine-guanine phosphoribosyltransferase OS=Mus musculus GN=Hprt1 PE=1 SV=3 - [HPRT_MOUSE]	218	24.5546	6.68311	5.48328e+07	5.93719e+07	8.27446e+07	8.19891e+07	1.21956e+08	2.58276e+08	3.24197e+08	1.44742e+08	1.79158e+08	9.579e+07	1.49355e+08	3.42686e+08		6.97346e+07	2.12293e+08	1.91747e+08	1.27365e+07	8.27057e+07	9.2122e+07		3.0443	0.0255891	2.74967	0.063456	0.90322	0.78344
Q9CQC9	GTP-binding protein SAR1b OS=Mus musculus GN=Sar1b PE=1 SV=1 - [SAR1B_MOUSE]	198	22.3675	6.11279	2.48695e+08	8.29626e+07	3.00493e+08	2.53092e+08	3.99646e+08	4.27651e+08	4.05188e+08	3.86055e+08	3.61209e+08	3.04188e+08	4.17872e+08	4.88902e+08		2.21311e+08	4.04635e+08	3.93043e+08	8.24166e+07	1.50012e+07	6.83997e+07		1.82836	0.00906873	1.77598	0.0321144	0.971351	0.783959
Q922Q8	Leucine-rich repeat-containing protein 59 OS=Mus musculus GN=Lrrc59 PE=1 SV=1 - [LRC59_MOUSE]	307	34.8558	9.5249	6.56884e+07	2.20372e+07	4.22088e+07	3.04107e+07	2.00557e+08	9.70718e+07	2.20792e+08	9.23234e+07	1.92676e+08	1.00525e+08	1.41051e+08	2.2472e+08		4.00863e+07	1.52686e+08	1.64743e+08	1.64268e+07	5.84521e+07	4.75991e+07		3.80893	0.0183181	4.10971	0.00516082	1.07897	0.791049
Q6P3A8	2-oxoisovalerate dehydrogenase subunit beta, mitochondrial OS=Mus musculus GN=Bckdhb PE=1 SV=2 - [ODBB_MOUSE]	390	42.8528	6.69775	3.83082e+07	8.40466e+06	1.31538e+07	1.3154e+07	5.78073e+07	9.44819e+07	1.84435e+08	1.15607e+08	1.69238e+08	1.54056e+08	3.77109e+07	4.28472e+07		1.82552e+07	1.13083e+08	1.00963e+08	1.17388e+07	4.60946e+07	6.09481e+07		6.19456	0.0135826	5.53066	0.0604332	0.892824	0.792755
Q99KI0	Aconitate hydratase, mitochondrial OS=Mus musculus GN=Aco2 PE=1 SV=1 - [ACON_MOUSE]	780	85.41	7.92822	7.04839e+08	6.76672e+08	6.18779e+08	7.77973e+08	1.42456e+09	1.84169e+09	2.09296e+09	2.04953e+09	1.69605e+09	2.49482e+09	9.91632e+08	1.85049e+09		6.94566e+08	1.85218e+09	1.75825e+09	5.72849e+07	2.64523e+08	5.34467e+08		2.66668	0.00031089	2.53143	0.014015	0.949283	0.794128
P41105	60S ribosomal protein L28 OS=Mus musculus GN=Rpl28 PE=1 SV=2 - [RL28_MOUSE]	137	15.7237	12.0151	866739	2.385e+07	3.03101e+07	866739	9.36201e+07	4.4005e+07	3.9006e+07	5.59054e+07	5.04996e+07	113305587	97992899	866739		1.39734e+07	5.81341e+07	6.56662e+07	1.33042e+07	2.13878e+07	4.39986e+07		4.16034	0.0228997	4.69937	0.0993562	1.12956	0.798651
P06151	L-lactate dehydrogenase A chain OS=Mus musculus GN=Ldha PE=1 SV=3 - [LDHA_MOUSE]	332	36.4752	7.73779	2.28716e+09	1.92967e+09	2.62029e+09	2.6915e+09	3.28702e+09	3.49953e+09	3.83032e+09	2.54547e+09	2.89724e+09	3.39683e+09	3.2245e+09	3.33899e+09		2.38216e+09	3.29059e+09	3.21439e+09	3.0256e+08	4.7175e+08	1.93323e+08		1.38135	0.0308562	1.34936	0.00700092	0.976844	0.804391
Q9QZD8	Mitochondrial dicarboxylate carrier OS=Mus musculus GN=Slc25a10 PE=1 SV=2 - [DIC_MOUSE]	287	31.6941	9.31982	2.7792e+07	5.08515e+07	9.10291e+07	1.09778e+08	1.10844e+07	1.00592e+07	1.73348e+06	8.83197e+06	1.14588e+07	1.73348e+06	9.79294e+06	1.20157e+07		6.98626e+07	7.92727e+06	8.75023e+06	3.22978e+07	3.66382e+06	4.13285e+06		0.11347	0.0164024	0.125249	0.0174489	1.10381	0.804966
Q99PG0	Arylacetamide deacetylase OS=Mus musculus GN=Aadac PE=1 SV=3 - [AAAD_MOUSE]	398	45.2213	7.48877	5.709e+08	3.9679e+08	3.47443e+08	3.0832e+08	7.00729e+08	7.11707e+08	7.87742e+08	4.54412e+08	6.53143e+08	8.11333e+08	4.70437e+08	6.17124e+08		4.05863e+08	6.63648e+08	6.38009e+08	1.00309e+08	1.25363e+08	1.2123e+08		1.63515	0.0319566	1.57198	0.0431751	0.961368	0.807506
P52840	Sulfotransferase 1A1 OS=Mus musculus GN=Sult1a1 PE=1 SV=1 - [ST1A1_MOUSE]	291	33.9522	8.104	6.01847e+08	3.53388e+08	4.91232e+08	3.00074e+08	1.10116e+09	8.53761e+08	1155057375	1221914729	6.08234e+08	1.55618e+09	930096618	1.02941e+09		4.36635e+08	1.08297e+09	1.03098e+09	1.18168e+08	1.39077e+08	3.40854e+08		2.48027	0.000858566	2.36119	0.0290463	0.95199	0.814896
Q3UQ44	Ras GTPase-activating-like protein IQGAP2 OS=Mus musculus GN=Iqgap2 PE=1 SV=2 - [IQGA2_MOUSE]	1575	180.416	5.64307	7.30031e+07	6.67544e+07	8.95677e+07	4.97495e+07	5.03666e+07	4.01486e+07	3.8624e+07	4.602e+07	3.03098e+07	1.22105e+08	4.53187e+07	2.60022e+06		6.97687e+07	4.37898e+07	5.00833e+07	1.42506e+07	4.69501e+06	4.43154e+07		0.627642	0.02404	0.717848	0.491501	1.14372	0.814908
O88569	Heterogeneous nuclear ribonucleoproteins A2/B1 OS=Mus musculus GN=Hnrnpa2b1 PE=1 SV=2 - [ROA2_MOUSE]	353	37.3797	8.95361	3.88016e+08	3.99231e+08	4.60544e+08	5.35677e+08	9.63764e+08	7.5299e+08	1.0674e+09	1.19606e+09	1.05156e+09	1.37353e+09	6.76095e+08	7.02451e+08		4.45867e+08	9.95054e+08	9.50908e+08	5.87428e+07	1.62181e+08	2.85477e+08		2.23173	0.00149445	2.13272	0.0239676	0.955635	0.823592
Q9CZU6	Citrate synthase, mitochondrial OS=Mus musculus GN=Cs PE=1 SV=1 - [CISY_MOUSE]	464	51.7034	8.57275	4.01948e+08	1.88282e+08	3.82365e+08	4.16321e+08	1.05726e+09	1.13654e+09	9.72497e+08	5.52663e+08	8.33127e+08	8.20624e+08	9.13691e+08	1.30576e+09		3.47229e+08	9.29738e+08	9.68301e+08	9.2556e+07	2.253e+08	1.98079e+08		2.67759	0.00606324	2.78865	0.00265637	1.04148	0.831196
P24270	Catalase OS=Mus musculus GN=Cat PE=1 SV=4 - [CATA_MOUSE]	527	59.7577	7.88428	4.78995e+09	4.38078e+09	5.7348e+09	4.07992e+09	8.26298e+09	8.28268e+09	8.38914e+09	5.93105e+09	7.38688e+09	8.11194e+09	6.98743e+09	7.81159e+09		4.74636e+09	7.71646e+09	7.57446e+09	6.23842e+08	1.03193e+09	4.25705e+08		1.62576	0.00528506	1.59584	0.000638645	0.981597	0.832917
Q71RI9	Kynurenine--oxoglutarate transaminase 3 OS=Mus musculus GN=Ccbl2 PE=1 SV=1 - [KAT3_MOUSE]	455	51.0932	8.36768	1.73348e+06	6.33812e+07	4.40468e+07	3.60059e+07	1.00038e+08	7.01386e+07	2.29761e+08	2.01637e+08	6.83952e+07	2.70424e+08	1.18645e+08	9.32118e+07		3.62919e+07	1.50394e+08	1.37669e+08	2.22954e+07	6.68984e+07	7.86782e+07		4.14401	0.0310558	3.79339	0.0753963	0.915391	0.838074
Q9CY58	Plasminogen activator inhibitor 1 RNA-binding protein OS=Mus musculus GN=Serbp1 PE=1 SV=2 - [PAIRB_MOUSE]	407	44.6873	8.54346	6.77041e+07	5.05547e+07	8.60851e+07	5.61305e+07	9.58793e+07	9.23074e+07	1.19483e+08	1.14221e+08	7.0629e+07	1.11226e+08	1.17066e+08	1.35831e+08		6.51186e+07	1.05473e+08	1.08688e+08	1.35939e+07	1.15994e+07	2.37795e+07		1.6197	0.00788043	1.66908	0.033068	1.03048	0.84026
Q8BH95	Enoyl-CoA hydratase, mitochondrial OS=Mus musculus GN=Echs1 PE=1 SV=1 - [ECHM_MOUSE]	290	31.4542	8.48486	1.59646e+08	1.27884e+08	1.56228e+08	1.16387e+08	3.46051e+08	2.48054e+08	3.77524e+08	4.72941e+08	2.35902e+08	4.42579e+08	3.75961e+08	3.37586e+08		1.40036e+08	3.61143e+08	3.48007e+08	1.83962e+07	8.02871e+07	7.48357e+07		2.57893	0.00350558	2.48512	0.00341622	0.963628	0.842638
Q62167	ATP-dependent RNA helicase DDX3X OS=Mus musculus GN=Ddx3x PE=1 SV=3 - [DDX3X_MOUSE]	662	73.056	7.18115	2.31611e+07	7.03042e+07	7.2749e+07	5.58574e+07	1.04061e+08	9.95875e+07	1.28302e+08	9.54862e+07	9.50533e+07	8.5823e+07	92441118	1.41944e+08		5.55179e+07	1.06859e+08	1.03815e+08	1.9765e+07	1.2746e+07	2.2269e+07		1.92477	0.00916855	1.86994	0.0307766	0.971515	0.843999
A2ATU0	Probable 2-oxoglutarate dehydrogenase E1 component DHKTD1, mitochondrial OS=Mus musculus GN=Dhtkd1 PE=1 SV=1 - [DHTK1_MOUSE]	921	102.728	6.90283	3.1131e+07	1.30011e+06	1.30011e+06	7.6146e+07	6.74022e+07	6.84652e+07	1.1087e+08	1.15991e+08	6.74616e+07	1.1686e+08	7.5946e+07	1.17761e+08		2.74693e+07	9.06821e+07	9.4507e+07	3.06287e+07	2.28234e+07	2.30019e+07		3.30122	0.0285621	3.44046	0.0230582	1.04218	0.844759
Q9JII6	Alcohol dehydrogenase [NADP(+)] OS=Mus musculus GN=Akr1a1 PE=1 SV=3 - [AK1A1_MOUSE]	325	36.5639	7.38623	6.77126e+08	8.02528e+08	9.58464e+08	5.50486e+08	1.39857e+09	1.53483e+09	1.33638e+09	1.12207e+09	1.58048e+09	1.17899e+09	1.1035e+09	1.66256e+09		7.47151e+08	1.34796e+09	1.38138e+09	1.5108e+08	1.48864e+08	2.43352e+08		1.80414	0.00269346	1.84887	0.00860742	1.02479	0.845911
Q60930	Voltage-dependent anion-selective channel protein 2 OS=Mus musculus GN=Vdac2 PE=1 SV=2 - [VDAC2_MOUSE]	295	31.7126	7.48877	4.25283e+07	1.56691e+07	3.73165e+07	2.81517e+07	7.52346e+07	7.80673e+07	7.73118e+07	1.58967e+08	9.21368e+07	1.74803e+08	4.53492e+07	4.80055e+07		3.09164e+07	9.73953e+07	9.00736e+07	1.01971e+07	3.55637e+07	5.2329e+07		3.15028	0.020788	2.91346	0.102993	0.924825	0.847761
Q8R164	Valacyclovir hydrolase OS=Mus musculus GN=Bphl PE=1 SV=1 - [BPHL_MOUSE]	291	32.8301	8.93896	2.51196e+08	3.43486e+08	3.82943e+08	3.37168e+08	4.28594e+08	5.21401e+08	7.01313e+08	3.98231e+08	4.15947e+08	4.59374e+08	3.87475e+08	7.11447e+08		3.28698e+08	5.12385e+08	4.93561e+08	4.80613e+07	1.18139e+08	1.28376e+08		1.55883	0.0468738	1.50156	0.082377	0.963262	0.857913
P62962	Profilin-1 OS=Mus musculus GN=Pfn1 PE=1 SV=2 - [PROF1_MOUSE]	140	14.9475	8.27979	4.19033e+08	3.15744e+08	3.27158e+08	3.11034e+08	7.91046e+08	7.2616e+08	6.32302e+08	9.3023e+08	6.58383e+08	7.94039e+08	6.78067e+08	8.88196e+08		3.43242e+08	7.69935e+08	7.54671e+08	4.41489e+07	1.08397e+08	9.28956e+07		2.24312	0.000736577	2.19865	0.000447721	0.980176	0.859181
Q99K67	Alpha-aminoadipic semialdehyde synthase, mitochondrial OS=Mus musculus GN=Aass PE=1 SV=1 - [AASS_MOUSE]	926	102.909	6.87354	4.05763e+08	1.72806e+08	1.86003e+08	2.16388e+08	6.66306e+08	5.98277e+08	7.30212e+08	1.37582e+09	5.69185e+08	1.72263e+09	3.98504e+08	4.14264e+08		2.4524e+08	8.42655e+08	7.76146e+08	9.40157e+07	3.11341e+08	5.50508e+08		3.43604	0.0190363	3.16484	0.150753	0.921072	0.861467
Q8K2B3	Succinate dehydrogenase [ubiquinone] flavoprotein subunit, mitochondrial OS=Mus musculus GN=Sdha PE=1 SV=1 - [SDHA_MOUSE]	664	72.5392	7.37158	6.14968e+08	4.71103e+08	3.40196e+08	5.32516e+08	9.91681e+08	9.31128e+08	1.02234e+09	7.28774e+08	6.79077e+08	1.40217e+09	6.36955e+08	1.0927e+09		4.89696e+08	9.1848e+08	9.52723e+08	1.00278e+08	1.14338e+08	3.14716e+08		1.87561	0.00275675	1.94554	0.0513005	1.03728	0.865232
P63028	Translationally-controlled tumor protein OS=Mus musculus GN=Tpt1 PE=1 SV=1 - [TCTP_MOUSE]	172	19.4496	4.85596	9.1191e+07	4.80109e+07	5.9172e+07	2.80496e+07	1.91281e+08	1.53405e+08	1.22919e+08	3.32129e+08	1.49952e+08	2.0668e+08	1.62808e+08	2.45147e+08		5.66059e+07	1.99933e+08	1.91147e+08	2.28695e+07	8.00728e+07	3.76079e+07		3.53202	0.0246014	3.3768	0.00183983	0.956052	0.869067
Q9WUM5	Succinyl-CoA ligase [ADP/GDP-forming] subunit alpha, mitochondrial OS=Mus musculus GN=Suclg1 PE=1 SV=4 - [SUCA_MOUSE]	346	36.132	9.39307	5.6157e+07	8.73586e+07	7.74002e+07	8.57874e+07	8.74969e+07	1.73832e+08	3.34563e+08	2.21948e+08	1.67299e+08	4.42651e+08	1.68036e+08	1.0042e+08		7.66758e+07	2.0446e+08	2.19601e+08	1.24368e+07	8.92345e+07	1.31672e+08		2.66655	0.0493492	2.86403	0.110409	1.07406	0.874454
P09411	Phosphoglycerate kinase 1 OS=Mus musculus GN=Pgk1 PE=1 SV=4 - [PGK1_MOUSE]	417	44.522	7.89893	9.3658e+08	1.06642e+09	1.06597e+09	1.09594e+09	2.46155e+09	2.15056e+09	2.58795e+09	1.61011e+09	1.38318e+09	2.07047e+09	2.19441e+09	2.91178e+09		1.04123e+09	2.20254e+09	2.13996e+09	6.16267e+07	3.7726e+08	5.42269e+08		2.11533	0.00189773	2.05523	0.0130309	0.971587	0.875053
P11714	Cytochrome P450 2D9 OS=Mus musculus GN=Cyp2d9 PE=1 SV=2 - [CP2D9_MOUSE]	504	56.9133	6.21436	3.99203e+08	4.03929e+08	3.93921e+08	5.88072e+08	7.84239e+08	7.41994e+08	7.67819e+08	4.52576e+08	9.08125e+08	7.31164e+07	7.68458e+08	8.63456e+08		4.46281e+08	6.86657e+08	6.53289e+08	8.19395e+07	1.35983e+08	3.38739e+08		1.53862	0.0394576	1.46385	0.343246	0.951405	0.879386
Q62452	UDP-glucuronosyltransferase 1-9 OS=Mus musculus GN=Ugt1a9 PE=1 SV=3 - [UD19_MOUSE]	528	59.9687	8.35303	866739	866739	866739	866739	5.12164e+07	5.51599e+07	2.77689e+07	9.97466e+07	8.52009e+07	1.11074e+08	3.13708e+07	2.26091e+07		866739	5.8473e+07	6.25637e+07	0	2.60283e+07	3.68614e+07		67.4631	0.00862492	72.1828	0.0273692	1.06996	0.880382
Q60932	Voltage-dependent anion-selective channel protein 1 OS=Mus musculus GN=Vdac1 PE=1 SV=3 - [VDAC1_MOUSE]	296	32.3314	8.42627	1.19791e+08	1.4136e+08	1.6414e+08	1.54152e+08	1.6534e+08	4.91808e+08	2.90818e+08	4.69224e+08	1.29244e+08	9.96715e+08	1.13533e+08	3.13318e+08		1.44861e+08	3.54297e+08	3.88202e+08	1.65737e+07	1.34026e+08	3.59999e+08		2.44578	0.0362387	2.67983	0.286538	1.0957	0.883507
P97807	Fumarate hydratase, mitochondrial OS=Mus musculus GN=Fh PE=1 SV=3 - [FUMH_MOUSE]	507	54.3221	9.0415	5.07569e+08	8.39596e+08	8.51849e+08	7.06891e+08	1.18181e+09	1.07746e+09	1.06397e+09	1.07734e+09	8.75961e+08	1.75176e+09	6.86375e+08	1.22154e+09		7.26476e+08	1.10014e+09	1.13391e+09	1.38581e+08	4.74684e+07	4.05044e+08		1.51436	0.00447928	1.56084	0.150355	1.03069	0.89066
P85094	Isochorismatase domain-containing protein 2A OS=Mus musculus GN=Isoc2a PE=1 SV=1 - [ISC2A_MOUSE]	206	22.403	8.01611	1.43385e+08	2.62517e+08	2.2946e+08	2.01388e+08	381290780	2.55563e+08	4.82208e+08	4.48975e+08	2.70565e+08	2.99437e+08	4.60504e+08	494967748		2.09187e+08	3.92009e+08	3.81369e+08	4.37202e+07	8.67661e+07	9.76695e+07		1.87396	0.0172668	1.82309	0.0317051	0.972856	0.89243
Q3U2P1	Protein transport protein Sec24A OS=Mus musculus GN=Sec24a PE=1 SV=1 - [SC24A_MOUSE]	1090	118.707	7.82568	4.47865e+06	1.27592e+07	1.25712e+07	1.35189e+07	2.54895e+07	2.38977e+07	3.24825e+07	2.78172e+07	4.46741e+07	1.41429e+07	1.51651e+07	4.01801e+07		1.0832e+07	2.74217e+07	2.85406e+07	3.68522e+06	3.23726e+06	1.39818e+07		2.53155	0.00109332	2.63484	0.0781459	1.0408	0.897006
Q8BMF4	Dihydrolipoyllysine-residue acetyltransferase component of pyruvate dehydrogenase complex, mitochondrial OS=Mus musculus GN=Dlat PE=1 SV=2 - [ODP2_MOUSE]	642	67.8987	8.57275	7.88453e+07	8.00525e+07	9.79266e+07	1.08074e+08	2.02332e+08	2.10911e+08	3.66459e+08	1.15054e+08	1.62191e+08	1.22051e+08	2.72277e+08	3.02616e+08		9.12247e+07	2.23689e+08	2.14784e+08	1.23176e+07	9.05597e+07	7.48087e+07		2.45206	0.0458783	2.35445	0.0302441	0.960189	0.89982
Q9R0P3	S-formylglutathione hydrolase OS=Mus musculus GN=Esd PE=1 SV=1 - [ESTD_MOUSE]	282	31.2993	7.12256	4.81237e+08	5.82639e+08	5.7921e+08	6.49798e+08	1.38668e+09	1.74493e+09	1.43343e+09	1.02889e+09	1.58596e+09	1.49116e+09	9.99572e+08	1.41572e+09		5.73221e+08	1.39848e+09	1.3731e+09	6.01035e+07	2.53963e+08	2.23935e+08		2.43969	0.00154766	2.39542	0.000985628	0.981852	0.900945
Q8VCW8	Acyl-CoA synthetase family member 2, mitochondrial OS=Mus musculus GN=Acsf2 PE=1 SV=1 - [ACSF2_MOUSE]	615	67.907	8.17725	7.70855e+08	8.54935e+08	8.82675e+08	7.87453e+08	1.12888e+09	1.09611e+09	1.47282e+09	9.15864e+08	1.19662e+09	1.09878e+09	1.03046e+09	1.35539e+09		8.2398e+08	1.15342e+09	1.17031e+09	4.62596e+07	2.01453e+08	1.2209e+08		1.39981	0.0328286	1.42032	0.00371302	1.01465	0.90518
P18242	Cathepsin D OS=Mus musculus GN=Ctsd PE=1 SV=1 - [CATD_MOUSE]	410	44.925	7.15186	866739	866739	866739	866739	137105647	1.17094e+08	1.35774e+08	4.06449e+07	1.35798e+08	2.13614e+08	866739	5.47642e+07		866739	1.07654e+08	1.01261e+08	0	3.94888e+07	8.07109e+07		124.206	0.00338216	116.829	0.0746465	0.940608	0.905935
Q9R0P5	Destrin OS=Mus musculus GN=Dstn PE=1 SV=3 - [DEST_MOUSE]	165	18.5095	7.97217	1.30011e+06	1.30011e+06	1.02563e+07	1.30011e+06	1.65031e+08	1.03965e+08	9.06558e+07	5.56306e+07	1.80817e+08	1.35853e+08	2.79773e+07	4.9947e+07		3.53916e+06	1.03821e+08	9.86484e+07	3.87815e+06	3.95042e+07	6.22536e+07		29.3348	0.00468957	27.8734	0.0384859	0.95018	0.907257
P00329	Alcohol dehydrogenase 1 OS=Mus musculus GN=Adh1 PE=1 SV=2 - [ADH1_MOUSE]	375	39.7456	8.104	8.81239e+09	6.19168e+09	8.65944e+09	8.39669e+09	2.20079e+10	1.66845e+10	1.92377e+10	9.21023e+09	1.76432e+10	1.55947e+10	1.76692e+10	1.74753e+10		8.01505e+09	1.67851e+10	1.70956e+10	1.06317e+09	4.76135e+09	8.69723e+08		2.0942	0.0207528	2.13294	2.66299e-05	1.0185	0.915146
P21981	Protein-glutamine gamma-glutamyltransferase 2 OS=Mus musculus GN=Tgm2 PE=1 SV=4 - [TGM2_MOUSE]	686	77.0123	5.09717	3.43745e+07	3.46696e+06	2.11221e+07	3.232e+07	2.82653e+08	2.77594e+08	1.43603e+08	3.17689e+08	2.41068e+08	6.59045e+08	9.08381e+07	9.06201e+07		2.28209e+07	2.55385e+08	2.70393e+08	1.22595e+07	6.63587e+07	2.32631e+08		11.1908	0.000990906	11.8485	0.11526	1.05877	0.91793
Q9DBG1	Sterol 26-hydroxylase, mitochondrial OS=Mus musculus GN=Cyp27a1 PE=1 SV=1 - [CP27A_MOUSE]	533	60.6819	9.14404	1.85239e+08	1.27335e+08	1.46447e+08	1.21237e+08	1.05208e+08	7.23077e+07	1.09894e+08	5.358e+07	7.28561e+07	5.12449e+07	1.12395e+08	1.13168e+08		1.45065e+08	8.52474e+07	8.7416e+07	2.49896e+07	2.33245e+07	2.64927e+07		0.587651	0.0230716	0.602601	0.0336597	1.02544	0.91872
O08749	Dihydrolipoyl dehydrogenase, mitochondrial OS=Mus musculus GN=Dld PE=1 SV=2 - [DLDH_MOUSE]	509	54.2382	7.89893	3.83726e+08	3.17662e+08	2.9937e+08	3.64756e+08	5.58272e+08	4.67085e+08	4.34981e+08	4.91583e+08	4.42279e+08	5.68184e+08	3.33222e+08	5.82099e+08		3.41378e+08	4.8798e+08	4.81446e+08	3.41577e+07	4.52752e+07	1.01438e+08		1.42944	0.00420516	1.4103	0.0639669	0.98661	0.922168
P11499	Heat shock protein HSP 90-beta OS=Mus musculus GN=Hsp90ab1 PE=1 SV=3 - [HS90B_MOUSE]	724	83.2291	5.03369	5.99454e+08	8.38642e+08	8.18996e+08	8.1768e+08	1.28462e+09	1.80562e+09	1.08533e+09	2.02802e+09	1.44753e+09	2.46441e+09	9.71788e+08	1.47541e+09		7.68693e+08	1.5509e+09	1.58979e+09	9.80624e+07	3.80852e+08	5.43187e+08		2.01758	0.0137171	2.06817	0.0419634	1.02507	0.922438
Q9D1R9	60S ribosomal protein L34 OS=Mus musculus GN=Rpl34 PE=1 SV=2 - [RL34_MOUSE]	117	13.2844	11.4731	1.67503e+07	1.5219e+07	1.93203e+07	1.30011e+06	9.09564e+07	6.3519e+07	1.05995e+08	8.50667e+07	8.33346e+07	1.3223e+08	1.05863e+08	1.31445e+07		1.31474e+07	8.63842e+07	8.36429e+07	6.99529e+06	1.52482e+07	4.42281e+07		6.57041	0.000277856	6.36191	0.0343302	0.968266	0.922466
P57780	Alpha-actinin-4 OS=Mus musculus GN=Actn4 PE=1 SV=1 - [ACTN4_MOUSE]	912	104.911	5.41455	2.43475e+08	3.11376e+08	3.79567e+08	2.73386e+08	4.47201e+08	3.98439e+08	5.00983e+08	6.7487e+08	2.17841e+08	5.68611e+08	4.63989e+08	7.21862e+08		3.01951e+08	5.05373e+08	4.93076e+08	5.0864e+07	1.04364e+08	1.83473e+08		1.67369	0.0229555	1.63297	0.132746	0.975667	0.922911
Q9DBF1	Alpha-aminoadipic semialdehyde dehydrogenase OS=Mus musculus GN=Aldh7a1 PE=1 SV=4 - [AL7A1_MOUSE]	539	58.8243	7.47412	9.60745e+08	1.19326e+09	1140979505	1.08227e+09	2.92368e+09	2.66295e+09	2.82886e+09	2.37391e+09	2.13615e+09	2.74889e+09	2.49946e+09	3.29564e+09		1.09431e+09	2.69735e+09	2.67003e+09	8.65358e+07	2.08757e+08	4.21818e+08		2.46488	1.77122e-05	2.43992	0.000722025	0.989873	0.9232
Q05421	Cytochrome P450 2E1 OS=Mus musculus GN=Cyp2e1 PE=1 SV=1 - [CP2E1_MOUSE]	493	56.7686	8.39697	1.12149e+09	4.98342e+08	5.92285e+08	1.01749e+09	1.73976e+09	1.80185e+09	2.30358e+09	1.38579e+09	2.3483e+09	1.73211e+09	1.62968e+09	1.62247e+09		8.074e+08	1.80775e+09	1.83314e+09	2.66729e+08	3.27319e+08	3.00573e+08		2.23897	0.00633222	2.27043	0.00446578	1.01405	0.924377
Q9JHI5	Isovaleryl-CoA dehydrogenase, mitochondrial OS=Mus musculus GN=Ivd PE=1 SV=1 - [IVD_MOUSE]	424	46.2959	8.29443	1.85007e+08	1.79805e+08	3.09465e+08	2.85956e+08	5.35891e+08	4.6718e+08	5.33111e+08	6.49295e+08	6.19404e+08	7.39121e+08	4.13534e+08	4.458e+08		2.40058e+08	5.46369e+08	5.54465e+08	5.82772e+07	6.54795e+07	1.32273e+08		2.27599	0.000921383	2.30971	0.00931559	1.01482	0.927404
Q60866	Phosphotriesterase-related protein OS=Mus musculus GN=Pter PE=1 SV=1 - [PTER_MOUSE]	349	39.1931	6.66846	1.30011e+06	1.10554e+07	1.59563e+07	1.026e+07	1.36079e+07	3.25489e+07	4.43795e+07	2.15945e+07	5.67245e+06	5.65853e+07	3.47256e+07	1.9987e+07		9.64295e+06	2.80327e+07	2.92426e+07	5.28766e+06	1.15881e+07	1.88342e+07		2.90707	0.0464876	3.03254	0.133365	1.04316	0.927587
Q64442	Sorbitol dehydrogenase OS=Mus musculus GN=Sord PE=1 SV=3 - [DHSO_MOUSE]	357	38.2247	7.02002	3.33179e+09	2.73971e+09	3.04227e+09	3.16982e+09	4.46806e+09	5.16428e+09	5.62598e+09	3.21974e+09	4.79084e+09	4.30034e+09	4.1906e+09	5.41383e+09		3.0709e+09	4.61952e+09	4.6739e+09	2.17001e+08	9.07202e+08	4.83298e+08		1.50429	0.0282218	1.522	0.00193683	1.01177	0.929967
Q8VBT2	L-serine dehydratase/L-threonine deaminase OS=Mus musculus GN=Sds PE=1 SV=3 - [SDHL_MOUSE]	327	34.5712	7.12256	3.76656e+08	3.40866e+08	4.91365e+08	3.00623e+08	7.67002e+08	7.90169e+08	6.46936e+08	1.4416e+09	2.37713e+08	2.02339e+09	9.98376e+08	5.24106e+08		3.77377e+08	9.11427e+08	9.45896e+08	7.1095e+07	3.10886e+08	6.78817e+08		2.41516	0.0273168	2.5065	0.199197	1.03782	0.938867
O35215	D-dopachrome decarboxylase OS=Mus musculus GN=Ddt PE=1 SV=3 - [DOPD_MOUSE]	118	13.0688	6.53662	3.48533e+09	2.71414e+09	3.43562e+09	2.26791e+09	5.74205e+09	4.44799e+09	5.79947e+09	5.97233e+09	5.4793e+09	6.78316e+09	4.66594e+09	5.21438e+09		2.97575e+09	5.49046e+09	5.5357e+09	5.10058e+08	6.07811e+08	7.77668e+08		1.84507	0.00153003	1.86027	0.00310197	1.00824	0.939306
Q99L13	3-hydroxyisobutyrate dehydrogenase, mitochondrial OS=Mus musculus GN=Hibadh PE=1 SV=1 - [3HIDH_MOUSE]	335	35.4166	8.1333	382417987	2.9563e+08	3.53109e+08	3.31252e+08	550171406	483416592	5.73651e+08	3.54922e+08	4.42509e+08	5.66531e+08	4.77488e+08	4.91455e+08		3.40602e+08	4.9054e+08	4.94496e+08	3.16817e+07	8.50093e+07	4.52497e+07		1.44021	0.0287027	1.45183	0.00292371	1.00806	0.945602
Q91X83	S-adenosylmethionine synthase isoform type-1 OS=Mus musculus GN=Mat1a PE=1 SV=1 - [METK1_MOUSE]	396	43.481	5.8208	2.07573e+09	1.77021e+09	2.52832e+09	1.9894e+09	7.1058e+09	5.60263e+09	6.21375e+09	7.65982e+09	4.17672e+09	1.24551e+10	5.53889e+09	3.88417e+09		2.09092e+09	6.6455e+09	6.51373e+09	2.76e+08	7.92891e+08	3.48664e+09		3.17827	8.2514e-05	3.11525	0.0710496	0.980171	0.951179
P34927	Asialoglycoprotein receptor 1 OS=Mus musculus GN=Asgr1 PE=1 SV=4 - [ASGR1_MOUSE]	284	32.5709	6.44287	1.21329e+08	1.16809e+08	1.59604e+08	1.5902e+08	1.45625e+07	1.73348e+06	7.32975e+07	1.73348e+06	1.22061e+07	1.89946e+07	1.73348e+06	5.33898e+07		1.39191e+08	2.28317e+07	2.1581e+07	2.01859e+07	2.96034e+07	1.93669e+07		0.164032	0.00134978	0.155046	0.000341545	0.94522	0.953159
P48036	Annexin A5 OS=Mus musculus GN=Anxa5 PE=1 SV=1 - [ANXA5_MOUSE]	319	35.7302	4.95752	2.7234e+08	2.42514e+08	2.73938e+08	3.84995e+08	6.61055e+08	5.12988e+08	5.14742e+08	5.88056e+08	5.34507e+08	8.38415e+08	4.26128e+08	5.00105e+08		2.93447e+08	5.6921e+08	5.74789e+08	5.43167e+07	6.10703e+07	1.57162e+08		1.93974	0.00110698	1.95875	0.0262689	1.0098	0.956161
P10639	Thioredoxin OS=Mus musculus GN=Txn PE=1 SV=3 - [THIO_MOUSE]	105	11.6676	4.91943	3.7706e+08	3.87692e+08	3.47069e+08	4.72029e+08	9.11953e+08	1.06098e+09	1.03669e+09	5.13545e+08	1.01934e+09	1.0997e+09	5.64064e+08	8.78829e+08		3.95963e+08	8.80792e+08	8.90484e+08	4.63744e+07	2.19439e+08	2.04366e+08		2.22443	0.00957593	2.24891	0.00644899	1.011	0.957176
Q61207	Prosaposin OS=Mus musculus GN=Psap PE=1 SV=2 - [SAP_MOUSE]	557	61.3814	5.18604	4.93119e+08	2.85275e+08	3.74192e+08	4.92097e+08	1.21249e+09	9.70769e+08	8.65331e+08	1.0622e+09	1.29659e+09	1.72323e+09	3.26368e+08	6.96126e+08		4.11171e+08	1.0277e+09	1.01058e+09	8.7295e+07	1.27417e+08	5.37751e+08		2.49944	0.000452897	2.45781	0.105334	0.983345	0.958959
P51660	Peroxisomal multifunctional enzyme type 2 OS=Mus musculus GN=Hsd17b4 PE=1 SV=3 - [DHB4_MOUSE]	735	79.432	8.57275	6.09812e+08	6.21817e+08	6.92639e+08	8.32869e+08	1.34275e+09	1.61283e+09	1.35087e+09	9.21744e+08	1.4265e+09	1.21364e+09	8.98398e+08	1.72925e+09		6.89284e+08	1.30705e+09	1.31695e+09	8.87349e+07	2.47567e+08	3.03255e+08		1.89624	0.00658617	1.9106	0.0137898	1.00757	0.966485
Q02053	Ubiquitin-like modifier-activating enzyme 1 OS=Mus musculus GN=Uba1 PE=1 SV=1 - [UBA1_MOUSE]	1058	117.734	5.65576	8.96067e+07	2.04106e+08	1.48808e+08	1.39345e+08	2.18257e+08	2.00733e+08	3.21778e+08	2.68057e+08	1.96484e+08	1.7933e+08	1.96168e+08	4.49017e+08		1.45467e+08	2.52206e+08	2.5525e+08	4.06434e+07	4.71526e+07	1.12086e+08		1.73377	0.024962	1.7547	0.161857	1.01207	0.966828
P08249	Malate dehydrogenase, mitochondrial OS=Mus musculus GN=Mdh2 PE=1 SV=3 - [MDHM_MOUSE]	338	35.5888	8.67529	1.38791e+09	1.38618e+09	1.5811e+09	1.35568e+09	2.57043e+09	2.73524e+09	2.9876e+09	3.80873e+09	2.53612e+09	4.71644e+09	2.05199e+09	2.69665e+09		1.42772e+09	3.0255e+09	3.0003e+09	8.94797e+07	4.75979e+08	1.01883e+09		2.11912	0.00124417	2.10147	0.0373645	0.991671	0.970298
P10649	Glutathione S-transferase Mu 1 OS=Mus musculus GN=Gstm1 PE=1 SV=2 - [GSTM1_MOUSE]	218	25.9531	7.94287	2.17626e+09	1.86674e+09	2.3153e+09	2.80919e+09	7.54052e+09	1.25362e+10	7.89637e+09	4.43437e+09	1.23681e+10	8.04952e+09	4.15897e+09	8.13901e+09		2.29187e+09	8.10187e+09	8.1789e+09	3.39951e+08	2.89272e+09	2.90377e+09		3.53504	0.0135493	3.56866	0.0130199	1.00951	0.975087
Q64464	Cytochrome P450 3A13 OS=Mus musculus GN=Cyp3a13 PE=1 SV=1 - [CP3AD_MOUSE]	503	57.4551	8.57275	866739	866739	866739	866739	1.49739e+08	866739	6.58462e+07	1.46262e+08	7.50034e+07	2.05495e+08	866739	8.53501e+07		866739	9.06785e+07	9.16787e+07	0	6.17667e+07	7.33468e+07		104.62	0.0453797	105.774	0.0756803	1.01103	0.986172
Q8CIM7	Cytochrome P450 2D26 OS=Mus musculus GN=Cyp2d26 PE=1 SV=1 - [CP2DQ_MOUSE]	500	56.9393	6.63916	7.8765e+08	4.29331e+08	6.10834e+08	5.51134e+08	1.20379e+09	1.05691e+09	1.21802e+09	1.31787e+09	1.42994e+09	1.52122e+09	4.07226e+08	1.42038e+09		5.94737e+08	1.19915e+09	1.19469e+09	1.29165e+08	9.31468e+07	4.56343e+08		2.01626	0.000594209	2.00877	0.0709728	0.996282	0.987309
P63325	40S ribosomal protein S10 OS=Mus musculus GN=Rps10 PE=1 SV=1 - [RS10_MOUSE]	165	18.9038	10.1548	2.61174e+08	2.60493e+08	2.6976e+08	2.1795e+08	3.98687e+08	3.83079e+08	4.17954e+08	4.47708e+08	3.10467e+08	4.72283e+08	4.21669e+08	4.44877e+08		2.52344e+08	4.11857e+08	4.12324e+08	2.01904e+07	2.41045e+07	6.14756e+07		1.63212	0.000120484	1.63397	0.00519241	1.00113	0.990627
P80315	T-complex protein 1 subunit delta OS=Mus musculus GN=Cct4 PE=1 SV=3 - [TCPD_MOUSE]	539	58.0297	8.01611	7.49814e+07	7.01755e+07	7.76168e+07	5.55911e+07	1.17092e+08	1.64216e+08	1.53604e+08	1.23734e+08	9.79028e+07	1.66133e+08	1.29328e+08	1.64503e+08		6.95912e+07	1.39661e+08	1.39467e+08	8.51191e+06	1.97505e+07	2.81436e+07		2.00688	0.00132725	2.00409	0.0062426	0.998605	0.99249
Q9EQ20	Methylmalonate-semialdehyde dehydrogenase [acylating], mitochondrial OS=Mus musculus GN=Aldh6a1 PE=1 SV=1 - [MMSA_MOUSE]	535	57.8785	8.07471	1.52331e+09	1.39066e+09	1.32216e+09	1.73075e+09	2.07258e+09	2.15172e+09	2.87062e+09	2.40175e+09	1.53985e+09	4.25496e+09	1.73669e+09	1.93947e+09		1.49172e+09	2.37417e+09	2.36774e+09	1.55803e+08	3.11312e+08	1.0987e+09		1.59156	0.00461541	1.58726	0.22053	0.997295	0.992543
Q9CZ13	Cytochrome b-c1 complex subunit 1, mitochondrial OS=Mus musculus GN=Uqcrc1 PE=1 SV=2 - [QCR1_MOUSE]	480	52.8185	6.21436	3.58997e+08	3.2619e+08	3.01276e+08	4.12193e+08	5.90485e+08	1.47819e+09	1.08112e+09	6.20551e+08	8.19027e+08	1.93993e+09	3.53697e+08	6.46925e+08		3.49664e+08	9.42587e+08	9.39896e+08	4.15013e+07	3.65289e+08	6.00863e+08		2.69569	0.0314352	2.688	0.140551	0.997145	0.994926
Q8VCB3	Glycogen [starch] synthase, liver OS=Mus musculus GN=Gys2 PE=1 SV=2 - [GYS2_MOUSE]	704	80.8195	6.88818	9.17865e+07	3.75414e+07	4.57953e+07	6.98681e+07	1.91063e+08	1.29254e+08	2.38916e+08	1.30587e+08	7.41366e+07	3.39946e+08	1.75261e+08	1.01906e+08		6.12478e+07	1.72455e+08	1.72812e+08	2.12585e+07	4.57781e+07	1.03325e+08		2.81569	0.00879971	2.82153	0.116697	1.00207	0.995806
Q8CHT0	Delta-1-pyrroline-5-carboxylate dehydrogenase, mitochondrial OS=Mus musculus GN=Aldh4a1 PE=1 SV=3 - [AL4A1_MOUSE]	562	61.8015	8.23584	7.09529e+08	8.25863e+08	8.9635e+08	8.59231e+08	1.81542e+09	9.89528e+08	1.17907e+09	1.18997e+09	1.0757e+09	1.76533e+09	1.29876e+09	1.03789e+09		8.22743e+08	1.2935e+09	1.29442e+09	6.99579e+07	3.11696e+08	2.89577e+08		1.57218	0.043349	1.5733	0.0336302	1.00071	0.997122
P24549	Retinal dehydrogenase 1 OS=Mus musculus GN=Aldh1a1 PE=1 SV=5 - [AL1A1_MOUSE]	501	54.4328	7.79639	3.32009e+09	2.66525e+09	3.35857e+09	2.92047e+09	6.83385e+09	8.2679e+09	9.74539e+09	5.39207e+09	9.0557e+09	5.98234e+09	5.84147e+09	9.3423e+09		3.0661e+09	7.5598e+09	7.55545e+09	2.88071e+08	1.62052e+09	1.64742e+09		2.46561	0.00322833	2.46419	0.00350578	0.999425	0.997505
Q01279	Epidermal growth factor receptor OS=Mus musculus GN=Egfr PE=1 SV=1 - [EGFR_MOUSE]	1210	134.766	6.85889	2.39441e+07	2.2843e+07	2.0912e+07	2.31186e+07	866739	866739	866739	866739	866739	866739	866739	866739		2.27044e+07	866739	866739	1.11136e+06	0	0		0.0381749	4.28482e-08	0.0381749	4.28482e-08	1	#DIV/0!
P28271	Cytoplasmic aconitate hydratase OS=Mus musculus GN=Aco1 PE=1 SV=3 - [ACOC_MOUSE]	889	98.0635	7.50342	8.25394e+08	6.52591e+08	7.40307e+08	6.59569e+08	7.36729e+06	7.36729e+06	7.36729e+06	7.36729e+06	7.36729e+06	7.36729e+06	7.36729e+06	7.36729e+06		7.19465e+08	7.36729e+06	7.36729e+06	7.02053e+07	0	0		0.0102399	2.18257e-06	0.0102399	2.18257e-06	1	#DIV/0!
Q9EQ06	Estradiol 17-beta-dehydrogenase 11 OS=Mus musculus GN=Hsd17b11 PE=1 SV=1 - [DHB11_MOUSE]	298	32.8597	8.66064	5.55534e+07	5.24203e+07	6.18715e+07	7.8878e+07	1.30011e+06	1.30011e+06	1.30011e+06	1.30011e+06	1.30011e+06	1.30011e+06	1.30011e+06	1.30011e+06		62180778	1.30011e+06	1.30011e+06	1.02235e+07	0	0		0.0209085	4.85374e-05	0.0209085	4.85374e-05	1	#DIV/0!
P51174	Long-chain specific acyl-CoA dehydrogenase, mitochondrial OS=Mus musculus GN=Acadl PE=1 SV=2 - [ACADL_MOUSE]	430	47.8775	8.30908	1.40088e+08	203233283	2.2688e+08	2.43248e+08	866739	866739	866739	866739	866739	866739	866739	866739		2.03362e+08	866739	866739	3.92032e+07	0	0		0.00426204	0.000108866	0.00426204	0.000108866	1	#DIV/0!
Q9CW42	Mitochondrial amidoxime-reducing component 1 OS=Mus musculus GN=Marc1 PE=1 SV=2 - [MARC1_MOUSE]	340	37.9546	8.5874	1.37312e+08	1.86516e+08	1.98244e+08	9.67428e+07	2.16685e+06	2.16685e+06	2.16685e+06	2.16685e+06	2.16685e+06	2.16685e+06	2.16685e+06	2.16685e+06		1.54704e+08	2.16685e+06	2.16685e+06	4.05268e+07	0	0		0.0140064	0.000621361	0.0140064	0.000621361	1	#DIV/0!
P08228	Superoxide dismutase [Cu-Zn] OS=Mus musculus GN=Sod1 PE=1 SV=2 - [SODC_MOUSE]	154	15.9328	6.50732	1.87696e+09	5.00911e+09	2625294492	2.52322e+09	1.73348e+06	1.73348e+06	1.73348e+06	1.73348e+06	1.73348e+06	1.73348e+06	1.73348e+06	1.73348e+06		3.00865e+09	1.73348e+06	1.73348e+06	1.19008e+09	0	0		0.000576166	0.00468702	0.000576166	0.00468702	1	#DIV/0!
Q9DCQ2	Putative L-aspartate dehydrogenase OS=Mus musculus GN=Aspdh PE=1 SV=1 - [ASPD_MOUSE]	287	30.2507	6.94678	1.18921e+08	1.30011e+06	1.24587e+08	129681675	1.30011e+06	1.30011e+06	1.30011e+06	1.30011e+06	1.30011e+06	1.30011e+06	1.30011e+06	1.30011e+06		9.36225e+07	1.30011e+06	1.30011e+06	5.34381e+07	0	0		0.0138867	0.0242455	0.0138867	0.0242455	1	#DIV/0!
Q8BGA8	Acyl-coenzyme A synthetase ACSM5, mitochondrial OS=Mus musculus GN=Acsm5 PE=1 SV=1 - [ACSM5_MOUSE]	578	64.2876	7.72314	2.90359e+07	5.69428e+07	866739	3.62699e+07	866739	866739	866739	866739	866739	866739	866739	866739		3.07788e+07	866739	866739	2.00778e+07	0	0		0.0281602	0.0417457	0.0281602	0.0417457	1	#DIV/0!
P17742	Peptidyl-prolyl cis-trans isomerase A OS=Mus musculus GN=Ppia PE=1 SV=2 - [PPIA_MOUSE]	164	17.9599	7.89893	1.21243e+09	1.01485e+09	1.39056e+09	1.18268e+09	1.38756e+09	1.3061e+09	1.5192e+09	1.66998e+09	1.14537e+09	1.5342e+09	1.39644e+09	1.49769e+09		1.20013e+09	1.47071e+09	1.39342e+09	1.33274e+08	1.37903e+08	1.51846e+08		1.22546	0.0502158	1.16106	0.148578	0.947449	0.538189
P52196	Thiosulfate sulfurtransferase OS=Mus musculus GN=Tst PE=1 SV=3 - [THTR_MOUSE]	297	33.4448	7.85498	1.30408e+09	6.74681e+08	1.23627e+09	1.17851e+09	1.43937e+09	1.35525e+09	1.47485e+09	1.68668e+09	1.06909e+09	1.31136e+09	8.54863e+08	8.56791e+08		1.09839e+09	1.48904e+09	1.02303e+09	2.48631e+08	1.22094e+08	1.87862e+08		1.35566	0.0502819	0.93139	0.689895	0.687039	0.0113319
Q00896	Alpha-1-antitrypsin 1-3 OS=Mus musculus GN=Serpina1c PE=1 SV=2 - [A1AT3_MOUSE]	412	45.7944	5.43994	2.87038e+08	1.2371e+08	2.72503e+08	2.16707e+08	3.25059e+08	4.56226e+08	6.25311e+08	3.01974e+08	2.83166e+08	2.42189e+08	1.7186e+08	3.54064e+08		2.2499e+08	4.27142e+08	2.6282e+08	6.40968e+07	1.28652e+08	6.60278e+07		1.8985	0.0507462	1.16814	0.503174	0.615297	0.0965893
Q9D9V3	Ethylmalonyl-CoA decarboxylase OS=Mus musculus GN=Echdc1 PE=1 SV=2 - [ECHD1_MOUSE]	322	35.4444	7.00537	1.30011e+06	1.30011e+06	1.30011e+06	1.30011e+06	1.30011e+06	7.58595e+07	9.10983e+07	3.46222e+07	1.30011e+06	1.30011e+06	2.89868e+07	9.33285e+07		1.30011e+06	5.072e+07	3.12289e+07	0	3.52274e+07	3.75927e+07		39.0121	0.0511717	24.0202	0.217113	0.615711	0.536582
Q923D2	Flavin reductase (NADPH) OS=Mus musculus GN=Blvrb PE=1 SV=3 - [BLVRB_MOUSE]	206	22.1834	7.00537	1.27734e+08	1.4714e+08	1.37984e+08	1.9443e+08	1.57159e+08	2.1525e+08	2.747e+08	2.39774e+08	3.94609e+08	3.12618e+08	4.20704e+08	5.94097e+08		1.51822e+08	2.2172e+08	4.30507e+08	2.55396e+07	4.2845e+07	1.02523e+08		1.4604	0.0513571	2.83561	0.00381634	1.94166	0.0173677
Q9DCG6	Phenazine biosynthesis-like domain-containing protein 1 OS=Mus musculus GN=Pbld1 PE=1 SV=2 - [PBLD1_MOUSE]	288	32.0276	7.03467	5.99228e+07	1.02345e+08	1.28687e+08	8.45239e+07	1.17457e+08	1.2449e+08	1.80654e+08	1.48963e+08	8.33744e+07	1.09358e+08	1.33373e+08	1.65566e+08		9.38697e+07	1.42891e+08	1.22918e+08	2.51189e+07	2.47405e+07	3.0314e+07		1.52223	0.0526997	1.30945	0.248465	0.860222	0.410654
P27659	60S ribosomal protein L3 OS=Mus musculus GN=Rpl3 PE=1 SV=3 - [RL3_MOUSE]	403	46.0808	10.2134	1.73348e+06	7.44988e+07	7.65497e+07	7.9699e+07	1.04443e+08	8.99553e+07	1.11987e+08	1.1429e+08	5.25528e+07	1.01113e+08	1.21755e+08	8.01505e+07		5.81203e+07	1.05169e+08	8.88929e+07	3.26076e+07	9.50867e+06	2.56237e+07		1.8095	0.0533527	1.52946	0.246088	0.845239	0.342099
Q8VC28	Aldo-keto reductase family 1 member C13 OS=Mus musculus GN=Akr1c13 PE=1 SV=2 - [AK1CD_MOUSE]	323	37.034	7.07861	2.09952e+08	3.03211e+08	2.60484e+08	2.79052e+08	3.27441e+08	5.29755e+08	4.20891e+08	3.02157e+08	3.54011e+08	4.61484e+08	3.30672e+08	4.76244e+08		2.63175e+08	3.95061e+08	4.05603e+08	3.42599e+07	8.94616e+07	6.40105e+07		1.50113	0.0544292	1.54119	0.0145341	1.02668	0.87362
O70133	ATP-dependent RNA helicase A OS=Mus musculus GN=Dhx9 PE=1 SV=2 - [DHX9_MOUSE]	1380	149.381	6.82959	866739	866739	1.15546e+07	1.65118e+07	2.02587e+07	2.12499e+07	1.29117e+07	1.68948e+07	9.88224e+06	1.51541e+07	866739	2.5186e+07		7.44997e+06	1.78288e+07	1.27723e+07	6.81254e+06	3.26566e+06	8.80151e+06		2.39313	0.0548062	1.7144	0.439223	0.716385	0.386862
P09405	Nucleolin OS=Mus musculus GN=Ncl PE=1 SV=2 - [NUCL_MOUSE]	707	76.6768	4.75439	3.10839e+07	2.51799e+07	2.79097e+07	7.23752e+07	9.11721e+07	5.04273e+07	7.21257e+07	1.25669e+08	5.64437e+07	8.72632e+07	9.05977e+07	2.08321e+08		3.91372e+07	8.48484e+07	1.10656e+08	1.93034e+07	2.76269e+07	5.79372e+07		2.16798	0.0571207	2.8274	0.088853	1.30416	0.512233
Q9CQV8	14-3-3 protein beta/alpha OS=Mus musculus GN=Ywhab PE=1 SV=3 - [1433B_MOUSE]	246	28.0689	4.83057	8.09908e+07	1.3478e+08	1.38772e+08	1.11118e+08	1.3744e+08	1.3797e+08	1.82711e+08	1.73925e+08	1.31232e+08	1.60465e+08	1.56988e+08	1.98828e+08		1.16415e+08	1.58012e+08	1.61878e+08	2.30221e+07	2.05436e+07	2.41369e+07		1.35731	0.0582426	1.39052	0.0562274	1.02447	0.839642
Q99PT1	Rho GDP-dissociation inhibitor 1 OS=Mus musculus GN=Arhgdia PE=1 SV=3 - [GDIR1_MOUSE]	204	23.3928	5.19873	3.41561e+07	6.20569e+07	7.31393e+07	3.64765e+07	1.07398e+08	6.56091e+07	7.84643e+07	1.49492e+08	4.25438e+07	3.59586e+08	1.14089e+08	8.59357e+07		5.14572e+07	1.00241e+08	1.50539e+08	1.66299e+07	3.22122e+07	1.23355e+08		1.94804	0.0585758	2.92551	0.21717	1.50177	0.519901
Q921I1	Serotransferrin OS=Mus musculus GN=Tf PE=1 SV=1 - [TRFE_MOUSE]	697	76.6737	7.18115	7.11598e+08	5.75287e+08	1.0406e+09	6.57334e+08	1.04196e+09	8.66345e+08	1.46192e+09	1.11316e+09	1.15234e+09	1.44451e+09	9.09134e+08	1.22478e+09		7.46204e+08	1.12085e+09	1.18269e+09	1.7676e+08	2.16439e+08	1.911e+08		1.50206	0.0592788	1.58494	0.0271834	1.05518	0.723386
P28474	Alcohol dehydrogenase class-3 OS=Mus musculus GN=Adh5 PE=1 SV=3 - [ADHX_MOUSE]	374	39.5221	7.25439	5.43623e+08	6.30437e+08	5.91728e+08	3.93133e+08	3.0983e+09	1.65194e+09	1.00703e+09	9.9971e+08	1.16819e+09	1.2247e+09	8.27193e+08	9.293e+08		5.3973e+08	1.68924e+09	1.03735e+09	9.0052e+07	8.55529e+08	1.64365e+08		3.12979	0.0599026	1.92197	0.00369655	0.61409	0.242565
Q8BVI4	Dihydropteridine reductase OS=Mus musculus GN=Qdpr PE=1 SV=2 - [DHPR_MOUSE]	241	25.5538	7.81104	2.30189e+08	2.47382e+08	2.83422e+08	2.94981e+08	7.15515e+08	4.37444e+08	7.83596e+08	2.56814e+08	5.6505e+08	4.72749e+08	5.99677e+08	4.9139e+08		2.63994e+08	5.48343e+08	5.32216e+08	2.62506e+07	2.12472e+08	5.20388e+07		2.0771	0.0610597	2.01602	0.000207639	0.970591	0.90257
P08113	Endoplasmin OS=Mus musculus GN=Hsp90b1 PE=1 SV=2 - [ENPL_MOUSE]	802	92.4183	4.81787	4.82801e+08	5.67675e+08	7.14011e+08	7.27221e+08	9.55129e+08	6.11925e+08	8.99977e+08	9.58434e+08	7.19272e+08	1.11477e+09	3.59007e+08	5.90577e+08		6.22927e+08	8.56366e+08	6.95906e+08	1.023e+08	1.43026e+08	2.74129e+08		1.37475	0.0611564	1.11716	0.680829	0.812627	0.403358
Q3TLP5	Enoyl-CoA hydratase domain-containing protein 2, mitochondrial OS=Mus musculus GN=Echdc2 PE=1 SV=2 - [ECHD2_MOUSE]	296	31.8317	8.71924	4.67708e+07	3.1411e+07	2.82994e+07	3.41155e+07	7.06439e+07	5.35599e+07	1.27896e+08	5.41343e+07	5.09458e+07	153562737	95986700	89506837		3.51491e+07	7.65584e+07	9.75005e+07	7.01827e+06	3.04231e+07	3.66623e+07		2.1781	0.0613369	2.77391	0.0275798	1.27354	0.475286
Q8CAQ8	MICOS complex subunit Mic60 OS=Mus musculus GN=Immt PE=1 SV=1 - [MIC60_MOUSE]	757	83.8482	6.60986	4.73264e+07	2.30801e+07	2.60138e+07	3.78148e+07	1.30011e+06	1.77175e+08	2.08797e+08	1.85342e+08	1.30011e+06	1.16798e+08	8.29802e+07	1.30011e+06		3.35588e+07	1.43153e+08	5.05947e+07	9.6746e+06	8.27176e+07	5.07239e+07		4.26576	0.0628598	1.50765	0.588464	0.35343	0.14958
Q93092	Transaldolase OS=Mus musculus GN=Taldo1 PE=1 SV=2 - [TALDO_MOUSE]	337	37.3634	7.03467	9.16138e+07	1.76663e+08	2.31524e+08	1.71769e+08	2.67832e+08	2.64881e+08	3.54224e+08	1.88506e+08	1.91796e+08	1.63463e+08	2.39518e+08	2.68917e+08		1.67892e+08	2.68861e+08	2.15923e+08	4.98983e+07	5.8653e+07	4.09247e+07		1.60139	0.0635795	1.28608	0.244824	0.803104	0.247133
P40936	Indolethylamine N-methyltransferase OS=Mus musculus GN=Inmt PE=1 SV=1 - [INMT_MOUSE]	264	29.4408	6.39209	8.75214e+08	8.56639e+08	9.2781e+08	1.0655e+09	1.07246e+09	1.4966e+09	1.37716e+09	9.76105e+08	1.32754e+09	7.81104e+08	1.60494e+09	1.81044e+09		9.3129e+08	1.23058e+09	1.381e+09	8.17625e+07	2.13312e+08	3.86426e+08		1.32137	0.0637372	1.4829	0.0960747	1.12224	0.576551
Q9JI75	Ribosyldihydronicotinamide dehydrogenase [quinone] OS=Mus musculus GN=Nqo2 PE=1 SV=3 - [NQO2_MOUSE]	231	26.2313	7.00537	1.73348e+06	6.64247e+07	1.14428e+08	5.27218e+06	1.2463e+08	4.23791e+08	1.94874e+08	1.28546e+08	8.82825e+07	1.14434e+08	1.67785e+08	5.73477e+07		4.69647e+07	2.1796e+08	1.06962e+08	4.66749e+07	1.2207e+08	4.05147e+07		4.64094	0.0639975	2.2775	0.143686	0.490742	0.185599
Q9QXE0	2-hydroxyacyl-CoA lyase 1 OS=Mus musculus GN=Hacl1 PE=1 SV=2 - [HACL1_MOUSE]	581	63.6189	6.26514	2.91796e+08	3.88776e+07	3.0909e+08	2.57683e+08	3.08738e+08	3.68571e+08	4.05582e+08	4.28312e+08	3.06225e+08	9.00909e+08	3.32465e+08	4.51675e+08		2.24362e+08	3.77801e+08	4.97818e+08	1.08675e+08	4.52165e+07	2.39093e+08		1.68389	0.0647383	2.21882	0.121373	1.31767	0.425729
P97372	Proteasome activator complex subunit 2 OS=Mus musculus GN=Psme2 PE=1 SV=4 - [PSME2_MOUSE]	239	27.0401	5.75732	1.7032e+07	3.43817e+07	3.92917e+07	3.28278e+07	3.99711e+07	4.8024e+07	4.77742e+07	3.74287e+07	3.44021e+07	5.11112e+07	4.77404e+07	5.88244e+07		3.08833e+07	4.32995e+07	4.80195e+07	8.34535e+06	4.68743e+06	8.82915e+06		1.40203	0.0657315	1.55487	0.0502625	1.10901	0.444707
P47963	60S ribosomal protein L13 OS=Mus musculus GN=Rpl13 PE=1 SV=3 - [RL13_MOUSE]	211	24.2905	11.5464	9.99293e+07	1.50442e+08	1.94514e+08	1.72599e+07	1.80567e+08	2.62132e+08	1.84595e+08	2.13847e+08	1.49963e+08	3.41789e+08	1.6068e+08	1.64497e+08		1.15536e+08	2.10285e+08	2.04232e+08	6.58745e+07	3.25727e+07	7.95967e+07		1.82008	0.0669734	1.76769	0.1876	0.971215	0.906955
P67778	Prohibitin OS=Mus musculus GN=Phb PE=1 SV=1 - [PHB_MOUSE]	272	29.8019	5.75732	3.83856e+08	6.44653e+08	3.31175e+08	2.36845e+08	5.17332e+08	5.75865e+08	7.5592e+08	1.02135e+09	5.66853e+08	7.49742e+08	4.14505e+08	6.87273e+08		3.99132e+08	7.17617e+08	6.04593e+08	1.51219e+08	1.96169e+08	1.27928e+08		1.79794	0.0675333	1.51477	0.122519	0.842501	0.435233
P15105	Glutamine synthetase OS=Mus musculus GN=Glul PE=1 SV=6 - [GLNA_MOUSE]	373	42.0923	7.07861	1.34106e+09	5.77084e+08	1.2606e+09	1.1491e+09	6.05004e+08	6.85157e+08	8.17287e+08	3.46696e+06	9.68656e+08	4.75292e+08	1.59802e+08	3.55108e+08		1.08196e+09	5.27729e+08	4.89715e+08	2.99354e+08	3.12029e+08	2.98561e+08		0.487752	0.0681945	0.452618	0.0514231	0.927967	0.88382
P80317	T-complex protein 1 subunit zeta OS=Mus musculus GN=Cct6a PE=1 SV=3 - [TCPZ_MOUSE]	531	57.9677	7.07861	4.33688e+07	7.86091e+07	9.50272e+07	1.61099e+08	1.13575e+08	1.67923e+08	2.80419e+08	1.94746e+08	1.29128e+08	2.09777e+07	1.78949e+08	1.85738e+08		9.45259e+07	1.89166e+08	1.28698e+08	4.27276e+07	6.02567e+07	6.59216e+07		2.00121	0.0682822	1.36151	0.479696	0.680347	0.285374
Q9D0M3	Cytochrome c1, heme protein, mitochondrial OS=Mus musculus GN=Cyc1 PE=1 SV=1 - [CY1_MOUSE]	325	35.3049	9.15869	9.57548e+07	4.12869e+07	4.17224e+07	5.36552e+07	1.83947e+08	3.38961e+08	1.73757e+08	5.83832e+07	1.95199e+08	2.54622e+08	1.30011e+06	5.31088e+07		5.81048e+07	1.88762e+08	1.26057e+08	2.22966e+07	9.97579e+07	1.02707e+08		3.24865	0.0687715	2.16948	0.305587	0.667812	0.476858
Q6PB66	Leucine-rich PPR motif-containing protein, mitochondrial OS=Mus musculus GN=Lrpprc PE=1 SV=2 - [LPPRC_MOUSE]	1392	156.516	6.82959	1.08471e+08	7.46261e+07	1.00661e+08	3.08531e+07	1.19422e+08	9.85802e+07	1.3452e+08	1.33349e+08	9.27876e+07	1.28546e+08	172163334	1.44786e+08		7.86527e+07	1.21468e+08	1.34571e+08	3.03088e+07	1.44875e+07	2.87214e+07		1.54436	0.0693802	1.71095	0.0594894	1.10787	0.506952
Q925I1	ATPase family AAA domain-containing protein 3 OS=Mus musculus GN=Atad3 PE=1 SV=1 - [ATAD3_MOUSE]	591	66.7006	9.29053	1.33335e+07	2.02524e+07	2.2667e+07	2.57396e+07	2.39509e+07	2.52615e+07	3.09794e+07	3.71162e+07	1.99879e+07	8.51426e+07	2.37563e+07	1.99705e+07		2.04981e+07	2.9327e+07	3.72143e+07	4.57084e+06	5.21615e+06	2.77143e+07		1.43072	0.0696307	1.8155	0.342392	1.26894	0.645259
O88833	Cytochrome P450 4A10 OS=Mus musculus GN=Cyp4a10 PE=2 SV=2 - [CP4AA_MOUSE]	509	58.2931	8.74854	866739	1.76633e+07	2.58792e+07	5.16464e+07	866739	866739	866739	866739	866739	866739	866739	2.34504e+07		2.40139e+07	866739	6.51266e+06	1.83245e+07	0	9.77903e+06		0.0360932	0.0712818	0.271204	0.194737	7.51398	0.355918
O55022	Membrane-associated progesterone receptor component 1 OS=Mus musculus GN=Pgrmc1 PE=1 SV=4 - [PGRC1_MOUSE]	195	21.6808	4.70361	6.40251e+08	7.96631e+08	8.06015e+08	6.63002e+08	8.53013e+08	8.11851e+08	1.03053e+09	8.04989e+08	1.07189e+09	8.1956e+08	1.07284e+09	1.6558e+09		7.26475e+08	8.75095e+08	1.15502e+09	7.53526e+07	9.15988e+07	3.06991e+08		1.20458	0.0730331	1.5899	0.0572018	1.31988	0.180941
Q9CQ60	6-phosphogluconolactonase OS=Mus musculus GN=Pgls PE=1 SV=1 - [6PGL_MOUSE]	257	27.2374	5.84619	4.59552e+07	2.69237e+07	9.18314e+07	7.36378e+07	1.04576e+08	9.45092e+07	7.75985e+07	9.57384e+07	9.47194e+07	1.01044e+08	1.34604e+08	1.48592e+08		5.9587e+07	9.31054e+07	1.1974e+08	2.49492e+07	9.75875e+06	2.2522e+07		1.56251	0.0733571	2.00949	0.0211218	1.28607	0.109237
Q9CQN1	Heat shock protein 75 kDa, mitochondrial OS=Mus musculus GN=Trap1 PE=1 SV=1 - [TRAP1_MOUSE]	706	80.1585	6.68311	1.7028e+07	5.29776e+07	5.40483e+07	5.70461e+07	220098493	2.20299e+07	1.58226e+08	1.50192e+08	2.36132e+07	1.09174e+08	1.21387e+08	5.43259e+07		4.5275e+07	1.37637e+08	7.7125e+07	1.63764e+07	7.20181e+07	3.99047e+07		3.04001	0.073464	1.70348	0.248157	0.560352	0.250127
P53395	Lipoamide acyltransferase component of branched-chain alpha-keto acid dehydrogenase complex, mitochondrial OS=Mus musculus GN=Dbt PE=1 SV=2 - [ODB2_MOUSE]	482	53.2129	8.60205	1.46526e+08	1.57744e+08	8.75017e+07	1.72503e+08	2.30464e+08	1.86748e+08	2.86737e+08	5.18462e+08	2.06417e+08	4.89058e+08	1.43198e+08	8.85027e+07		1.41069e+08	3.05603e+08	2.31794e+08	3.227e+07	1.27903e+08	1.54281e+08		2.16634	0.0740362	1.64312	0.357277	0.758481	0.547087
Q99J39	Malonyl-CoA decarboxylase, mitochondrial OS=Mus musculus GN=Mlycd PE=1 SV=1 - [DCMC_MOUSE]	492	54.7013	8.93896	1.61726e+07	866739	866739	866739	866739	2.49441e+07	3.4394e+07	3.77516e+07	2.46268e+07	3.24821e+07	3.20567e+07	8.4672e+06		4.69319e+06	2.44891e+07	2.44082e+07	6.62761e+06	1.44242e+07	9.7192e+06		5.21801	0.0740776	5.20077	0.0272369	0.996696	0.993832
Q8BWF0	Succinate-semialdehyde dehydrogenase, mitochondrial OS=Mus musculus GN=Aldh5a1 PE=1 SV=1 - [SSDH_MOUSE]	523	55.9328	8.25049	6.85595e+07	4.8979e+07	3.72339e+07	8.81392e+07	1.2249e+08	5.09455e+07	2.09757e+08	1.70396e+08	5.18282e+07	1.18359e+08	5.89424e+07	1.62337e+08		6.07279e+07	1.38397e+08	9.78668e+07	1.93824e+07	5.91967e+07	4.53075e+07		2.27897	0.0741056	1.61156	0.239594	0.707146	0.382692
Q9WVJ2	26S proteasome non-ATPase regulatory subunit 13 OS=Mus musculus GN=Psmd13 PE=1 SV=1 - [PSD13_MOUSE]	376	42.7821	5.70654	2.99418e+07	5.97699e+07	9.05459e+07	5.55964e+07	1.48039e+08	252437422	1.11856e+08	7.21494e+07	9.90817e+07	2.01927e+08	8.89939e+07	1.81778e+08		5.89635e+07	1.4612e+08	1.42945e+08	2.15157e+07	6.6994e+07	4.95518e+07		2.47815	0.0755837	2.4243	0.035926	0.978269	0.949521
P52825	Carnitine O-palmitoyltransferase 2, mitochondrial OS=Mus musculus GN=Cpt2 PE=1 SV=2 - [CPT2_MOUSE]	658	73.9336	8.36768	2.25878e+08	1.59892e+08	1.78839e+08	3.31678e+08	3.90088e+08	4.21509e+08	3.61277e+08	2.22983e+08	4.99442e+08	5.25437e+08	1.25124e+08	3.41893e+08		2.24072e+08	3.48964e+08	3.72974e+08	6.66095e+07	7.57904e+07	1.59401e+08		1.55738	0.0757428	1.66453	0.186079	1.0688	0.82157
P51410	60S ribosomal protein L9 OS=Mus musculus GN=Rpl9 PE=1 SV=2 - [RL9_MOUSE]	192	21.8678	9.94971	1.62222e+08	1.98444e+08	2.65597e+08	1.73173e+08	2.68495e+08	2.54933e+08	4.17138e+08	6.27224e+08	2.61136e+08	6.11174e+08	4.04632e+08	3.96516e+08		1.99859e+08	3.91947e+08	4.18365e+08	4.01624e+07	1.50002e+08	1.25062e+08		1.96112	0.0758835	2.0933	0.0280113	1.0674	0.822552
Q9EQU5	Protein SET OS=Mus musculus GN=Set PE=1 SV=1 - [SET_MOUSE]	289	33.3577	4.32275	866739	866739	866739	866739	8.71664e+07	2.16471e+07	866739	5.7337e+07	866739	4.0837e+07	866739	3.67081e+07		866739	4.17543e+07	1.98197e+07	0	3.30952e+07	1.9009e+07		48.174	0.0761644	22.8669	0.134925	0.474674	0.357957
Q8BFR5	Elongation factor Tu, mitochondrial OS=Mus musculus GN=Tufm PE=1 SV=1 - [EFTU_MOUSE]	452	49.477	7.56201	8.53985e+07	1.65793e+08	1.64314e+08	1.81448e+08	1.56344e+08	2.99498e+08	2.72989e+08	4.95839e+08	4.12442e+08	1.69103e+08	1.10406e+08	3.44756e+08		1.49239e+08	3.06168e+08	2.59177e+08	3.74645e+07	1.22032e+08	1.23552e+08		2.05153	0.0772873	1.73666	0.190688	0.846519	0.655838
P47740	Fatty aldehyde dehydrogenase OS=Mus musculus GN=Aldh3a2 PE=1 SV=2 - [AL3A2_MOUSE]	484	53.9363	8.35303	5.71618e+08	4.32914e+08	5.17919e+08	6.045e+08	2.47082e+08	1.86658e+08	5.93137e+08	4.76707e+06	6.17429e+08	3.27957e+08	2.86245e+08	8.37153e+08		5.31738e+08	2.57911e+08	5.17196e+08	6.48878e+07	2.13103e+08	2.24482e+08		0.485034	0.0773071	0.972653	0.917679	2.00533	0.196996
P14148	60S ribosomal protein L7 OS=Mus musculus GN=Rpl7 PE=1 SV=2 - [RL7_MOUSE]	270	31.3998	10.8872	7.79359e+07	1.30834e+08	6.67993e+07	1.763e+08	4.16311e+08	2.66382e+08	7.92519e+07	3.4321e+08	7.45188e+07	2.76288e+08	2.54843e+09	1.33629e+08		1.12967e+08	2.76289e+08	7.58218e+08	4.38431e+07	1.25505e+08	1.03618e+09		2.44574	0.0774401	6.71184	0.322611	2.74429	0.454353
Q80X90	Filamin-B OS=Mus musculus GN=Flnb PE=1 SV=3 - [FLNB_MOUSE]	2602	277.651	5.70654	1.77727e+07	1.25308e+08	1.34183e+08	1.18112e+08	1.46751e+08	1.41707e+08	1.77673e+08	1.70592e+08	1.31043e+08	2.81877e+07	1.55083e+08	1.70668e+08		9.8844e+07	1.59181e+08	1.21245e+08	4.71514e+07	1.52643e+07	5.55502e+07		1.61042	0.0795208	1.22663	0.613509	0.761684	0.297532
Q06185	ATP synthase subunit e, mitochondrial OS=Mus musculus GN=Atp5i PE=1 SV=2 - [ATP5I_MOUSE]	71	8.23047	9.34912	2.58968e+08	5.54575e+07	2.86606e+08	3.95301e+08	4.82982e+08	3.46126e+08	5.18557e+08	3.46405e+08	491555712	6.6826e+08	3.24024e+08	4.52386e+08		2.49083e+08	4.23517e+08	4.84056e+08	1.22858e+08	7.82691e+07	1.23086e+08		1.70031	0.083419	1.94335	0.0578259	1.14294	0.499249
P41317	Mannose-binding protein C OS=Mus musculus GN=Mbl2 PE=1 SV=2 - [MBL2_MOUSE]	244	25.9409	5.05908	866739	1.2868e+07	1.29542e+07	866739	4.19072e+07	3.69536e+07	7.20513e+07	866739	5.7503e+07	866739	5.85325e+06	6.80578e+07		6.88892e+06	3.79447e+07	3.30702e+07	6.02226e+06	2.52721e+07	2.99955e+07		5.50808	0.0838333	4.80049	0.188795	0.871536	0.836697
O35488	Very long-chain acyl-CoA synthetase OS=Mus musculus GN=Slc27a2 PE=1 SV=2 - [S27A2_MOUSE]	620	70.3775	8.89502	3.55039e+08	4.16379e+08	6.93417e+08	9.60993e+08	3.28377e+08	2.56556e+08	3.76962e+08	2.9204e+08	3.16707e+08	3.42291e+08	3.02484e+08	5.74565e+08		6.06457e+08	3.13484e+08	3.84012e+08	2.41142e+08	4.45865e+07	1.10937e+08		0.51691	0.0839728	0.633205	0.196836	1.22498	0.346329
P00405	Cytochrome c oxidase subunit 2 OS=Mus musculus GN=Mtco2 PE=1 SV=1 - [COX2_MOUSE]	227	25.959	4.729	6.40241e+08	1.79035e+08	3.2034e+08	3.52642e+08	6.7262e+08	4.0047e+08	7.42896e+08	6.73046e+08	5.53657e+08	9.66662e+08	1.0151e+07	6.58957e+08		3.73064e+08	6.22258e+08	5.47357e+08	1.67502e+08	1.31205e+08	3.4529e+08		1.66796	0.0888429	1.46719	0.461436	0.87963	0.737427
Q6ZWV7	60S ribosomal protein L35 OS=Mus musculus GN=Rpl35 PE=1 SV=1 - [RL35_MOUSE]	123	14.5436	11.0483	866739	6.62106e+07	6.55511e+07	6.49145e+07	9.12815e+07	8.38396e+07	8.71188e+07	2.04886e+08	1.68069e+08	1.9575e+08	2.15333e+08	9.57688e+07		4.93857e+07	1.16781e+08	1.6873e+08	2.80162e+07	5.09354e+07	4.53479e+07		2.36468	0.0913992	3.41658	0.00819012	1.44484	0.235151
Q8R0W0	Epiplakin OS=Mus musculus GN=Eppk1 PE=1 SV=2 - [EPIPL_MOUSE]	6548	724.183	6.07471	866739	866739	1.68105e+07	866739	2.64501e+07	2.63169e+07	2.55555e+07	866739	2.10131e+07	3.10523e+07	2.71131e+07	3.77953e+07		4.85269e+06	1.97973e+07	2.92434e+07	6.90387e+06	1.09349e+07	6.09679e+06		4.07966	0.0922191	6.02623	0.00374404	1.47714	0.239121
P56593	Cytochrome P450 2A12 OS=Mus musculus GN=Cyp2a12 PE=1 SV=2 - [CP2AC_MOUSE]	492	56.1431	9.18799	2.27541e+07	3.21454e+07	3.77401e+07	4.31836e+07	4.21891e+07	9.72401e+07	4.82627e+07	5.388e+07	6.57156e+07	4.53526e+07	3.34281e+07	1.05464e+08		3.39558e+07	6.0393e+07	6.24902e+07	7.55363e+06	2.16717e+07	2.73655e+07		1.77858	0.0930439	1.84034	0.13234	1.03473	0.920514
O88844	Isocitrate dehydrogenase [NADP] cytoplasmic OS=Mus musculus GN=Idh1 PE=1 SV=2 - [IDHC_MOUSE]	414	46.6445	7.1665	5.33768e+08	6.55805e+08	4.50682e+08	3.30747e+08	6.20707e+08	6.12997e+08	7.98179e+08	5.98598e+08	5.87773e+08	5.6913e+08	6.13226e+08	4.96906e+08		4.9275e+08	6.5762e+08	5.66759e+08	1.18621e+08	8.15387e+07	4.32607e+07		1.33459	0.0945165	1.15019	0.349174	0.861833	0.13908
P70694	Estradiol 17 beta-dehydrogenase 5 OS=Mus musculus GN=Akr1c6 PE=1 SV=1 - [DHB5_MOUSE]	323	37.024	8.27979	3.12737e+09	2.81595e+09	3.35666e+09	2.42389e+09	2.28329e+09	2.42106e+09	2.84518e+09	2.2328e+09	1.85099e+09	2.38559e+09	2.79061e+09	2.20473e+09		2.93097e+09	2.44558e+09	2.30798e+09	3.5005e+08	2.40777e+08	3.38547e+08		0.834395	0.0951862	0.787447	0.068595	0.943734	0.587017
Q9CQQ7	ATP synthase F(0) complex subunit B1, mitochondrial OS=Mus musculus GN=Atp5f1 PE=1 SV=1 - [AT5F1_MOUSE]	256	28.9304	9.05615	1.60839e+08	5.29257e+08	3.64786e+08	4.14665e+08	5.71363e+08	4.15309e+08	5.52317e+08	6.56214e+08	5.31835e+08	6.72677e+08	4.21167e+08	5.80925e+08		3.67387e+08	5.48801e+08	5.51651e+08	1.33329e+08	8.64282e+07	9.07234e+07		1.4938	0.0953444	1.50155	0.0951507	1.00519	0.969852
O08709	Peroxiredoxin-6 OS=Mus musculus GN=Prdx6 PE=1 SV=3 - [PRDX6_MOUSE]	224	24.855	6.01123	2.64127e+09	2.61943e+09	2.97779e+09	3.0606e+09	3.60085e+09	5.33129e+09	4.41936e+09	2.61423e+09	4.62025e+09	5.30658e+09	4.11449e+09	4.13723e+09		2.82477e+09	3.99143e+09	4.54464e+09	1.96767e+08	1.00344e+09	4.84067e+08		1.41301	0.0955331	1.60885	0.00125918	1.1386	0.42279
Q9DC50	Peroxisomal carnitine O-octanoyltransferase OS=Mus musculus GN=Crot PE=1 SV=1 - [OCTC_MOUSE]	612	70.2191	6.72705	5.71883e+07	1.2013e+08	1.1309e+08	1.47874e+08	8.72509e+07	4.28822e+07	6.92748e+07	7.24173e+07	9.88008e+07	1.29918e+08	5.40266e+07	9.72068e+07		1.09571e+08	6.79563e+07	9.49881e+07	3.29201e+07	1.59893e+07	2.70065e+07		0.620206	0.0964214	0.866913	0.574728	1.39778	0.186347
Q8R1G2	Carboxymethylenebutenolidase homolog OS=Mus musculus GN=Cmbl PE=1 SV=1 - [CMBL_MOUSE]	245	27.884	7.18115	1.39889e+08	6.05464e+07	1.03039e+08	4.91725e+07	4.3068e+08	2.71123e+08	7.48587e+07	1.84824e+08	3.72812e+08	2.12196e+08	2.27829e+08	3.3043e+08		8.81618e+07	2.40372e+08	2.85817e+08	3.59855e+07	1.30041e+08	6.77146e+07		2.72648	0.0985269	3.24196	0.0042625	1.18906	0.61067
P38060	Hydroxymethylglutaryl-CoA lyase, mitochondrial OS=Mus musculus GN=Hmgcl PE=1 SV=2 - [HMGCL_MOUSE]	325	34.2167	8.41162	1.25942e+08	6.10631e+07	1.66775e+08	1.92565e+08	2.54576e+08	1.67189e+08	2.89518e+08	1.65626e+08	1.78214e+08	6.89008e+07	1.74204e+08	9.82937e+07		1.36586e+08	2.19227e+08	1.29903e+08	4.96538e+07	5.42479e+07	4.74789e+07		1.60505	0.0995593	0.95107	0.871731	0.59255	0.0755117
P07759	Serine protease inhibitor A3K OS=Mus musculus GN=Serpina3k PE=1 SV=2 - [SPA3K_MOUSE]	418	46.85	5.16064	1.08452e+08	5.21195e+07	7.36964e+07	7.36605e+07	1.22518e+08	3.06842e+08	1.65903e+08	9.23448e+07	1.17432e+08	8.2832e+07	9.75958e+07	1.24747e+08		7.69821e+07	1.71902e+08	1.05652e+08	2.01887e+07	8.2178e+07	1.65004e+07		2.23301	0.100048	1.37242	0.105512	0.614605	0.220029
P24456	Cytochrome P450 2D10 OS=Mus musculus GN=Cyp2d10 PE=1 SV=2 - [CP2DA_MOUSE]	504	57.1965	6.60986	5.03414e+08	6.11767e+08	5.46889e+08	8.86854e+08	8.31071e+08	8.39387e+08	9.35144e+08	7.05793e+08	8.17401e+08	4.6286e+08	6.49969e+08	9.52977e+08		6.37231e+08	8.27849e+08	7.20802e+08	1.49189e+08	8.14761e+07	1.83567e+08		1.29913	0.100127	1.13115	0.563042	0.870692	0.39152
Q8BH86	UPF0317 protein C14orf159 homolog, mitochondrial OS=Mus musculus PE=1 SV=1 - [CN159_MOUSE]	617	66.3232	7.09326	866739	866739	866739	866739	5.41311e+07	1.77102e+08	5.90088e+07	866739	5.36666e+07	4.0044e+07	7.3102e+07	7.14045e+07		866739	7.27772e+07	5.95543e+07	0	6.44051e+07	1.35949e+07		83.9666	0.101296	68.7107	0.000295496	0.818309	0.739768
P06801	NADP-dependent malic enzyme OS=Mus musculus GN=Me1 PE=1 SV=2 - [MAOX_MOUSE]	572	63.9131	7.44482	3.36493e+08	3.85521e+08	2.85921e+08	3.12287e+08	7.57843e+08	1.70621e+09	1.50526e+09	1.32076e+08	8.93431e+08	3.37762e+08	2.08563e+09	1.11142e+09		3.30056e+08	1.02535e+09	1.10706e+09	3.66789e+07	6.25176e+08	6.31483e+08		3.10659	0.102838	3.35416	0.0774648	1.07969	0.878678
Q924Y0	Gamma-butyrobetaine dioxygenase OS=Mus musculus GN=Bbox1 PE=1 SV=1 - [BODG_MOUSE]	387	44.6705	6.91748	1.67479e+07	2.24392e+07	2.70095e+07	2.45719e+07	7.99508e+07	6.56213e+07	6.10095e+07	7.29807e+06	6.78241e+07	2.5473e+07	6.89587e+07	1.42177e+08		2.26921e+07	5.34699e+07	7.61083e+07	3.79379e+06	2.75571e+07	4.19786e+07		2.35632	0.103782	3.35395	0.0705844	1.42338	0.464574
Q9WVM8	Kynurenine/alpha-aminoadipate aminotransferase, mitochondrial OS=Mus musculus GN=Aadat PE=1 SV=1 - [AADAT_MOUSE]	425	47.5676	8.25049	866739	866739	1.45885e+07	3.47172e+07	3.2746e+07	1.60614e+07	5.71854e+07	3.41947e+07	866739	4.24558e+07	866739	5.18487e+07		1.27598e+07	3.50469e+07	2.40095e+07	1.38597e+07	1.46337e+07	2.33798e+07		2.74666	0.103949	1.88165	0.500371	0.685068	0.51416
Q91X34	Bile acid-CoA:amino acid N-acyltransferase OS=Mus musculus GN=Baat PE=1 SV=1 - [BAAT_MOUSE]	420	46.4521	6.68311	1.58942e+08	1.60561e+08	2.79699e+08	1.36408e+08	9.53492e+07	1.42815e+08	1.26552e+08	1.14913e+08	2.19791e+08	1.28296e+08	1.42585e+08	3.31901e+08		1.83902e+08	1.19907e+08	2.05643e+08	5.61259e+07	1.72986e+07	8.07775e+07		0.652016	0.108058	1.11822	0.715039	1.71502	0.122357
P30115	Glutathione S-transferase A3 OS=Mus musculus GN=Gsta3 PE=1 SV=2 - [GSTA3_MOUSE]	221	25.3443	8.73389	1.40854e+09	2.58163e+09	2.80114e+09	2.97468e+09	3.2324e+09	6.03188e+09	3.38217e+09	3.04718e+09	2.82963e+09	5.10991e+09	3.09572e+09	3.04073e+09		2.4415e+09	3.92341e+09	3.519e+09	6.12425e+08	1.2231e+09	9.23869e+08		1.60697	0.109691	1.44133	0.14322	0.896924	0.663765
P63030	Mitochondrial pyruvate carrier 1 OS=Mus musculus GN=Mpc1 PE=1 SV=1 - [MPC1_MOUSE]	109	12.4463	9.61279	866739	866739	866739	2.73611e+07	3.58544e+07	866739	4.34281e+07	3.77624e+07	866739	4.90582e+07	6.48196e+07	866739		7.49034e+06	2.94779e+07	2.89028e+07	1.14724e+07	1.67519e+07	2.85845e+07		3.93546	0.109808	3.85868	0.27389	0.98049	0.97699
O08573	Galectin-9 OS=Mus musculus GN=Lgals9 PE=1 SV=1 - [LEG9_MOUSE]	353	40.01	9.30518	1.02611e+08	1.45361e+08	1.61203e+08	8.36421e+07	2.24688e+08	3.52858e+08	1.66817e+08	1.3363e+08	1.77676e+08	1.24962e+08	1.88147e+08	1.47891e+08		1.23204e+08	2.19498e+08	1.59669e+08	3.13211e+07	8.36069e+07	2.48925e+07		1.78158	0.110971	1.29597	0.165493	0.727427	0.279751
P10648	Glutathione S-transferase A2 OS=Mus musculus GN=Gsta2 PE=1 SV=3 - [GSTA2_MOUSE]	222	25.5256	8.80713	5.67164e+07	1.73348e+06	1.13715e+08	1.73348e+06	1.73348e+06	5.95804e+08	2.38612e+08	1.07135e+09	3.67615e+08	1.97162e+09	1.80361e+08	3.91772e+08		4.34747e+07	4.76875e+08	7.27842e+08	4.63513e+07	4.03136e+08	7.22741e+08		10.969	0.113807	16.7417	0.152803	1.52627	0.618241
Q91W64	Cytochrome P450 2C70 OS=Mus musculus GN=Cyp2c70 PE=1 SV=2 - [CP270_MOUSE]	489	55.9838	8.08936	866739	866739	2.20994e+07	866739	3.50545e+07	3.27743e+07	866739	2.56321e+07	7.14812e+07	866739	3.34859e+07	3.39938e+07		6.17491e+06	2.35819e+07	3.49569e+07	9.19402e+06	1.35674e+07	2.49963e+07		3.81899	0.11544	5.66112	0.110407	1.48236	0.51438
Q9DCX8	Iodotyrosine deiodinase 1 OS=Mus musculus GN=Iyd PE=1 SV=1 - [IYD1_MOUSE]	285	32.7932	6.3667	3.29221e+07	1.51994e+07	866739	866739	5.19162e+07	866739	5.17494e+07	5.73244e+07	4.50946e+07	866739	5.03107e+07	9.64371e+07		1.24637e+07	4.04642e+07	4.81773e+07	1.31815e+07	2.29713e+07	3.38429e+07		3.24655	0.116796	3.8654	0.139429	1.19062	0.75505
Q99MZ7	Peroxisomal trans-2-enoyl-CoA reductase OS=Mus musculus GN=Pecr PE=1 SV=1 - [PECR_MOUSE]	303	32.3897	8.29443	8.00284e+07	9.00646e+07	1.53003e+08	9.33329e+07	2.10545e+08	1.15691e+08	2.51843e+08	1.16625e+08	1.23796e+08	2.76624e+08	2.8651e+08	1.75474e+08		1.04107e+08	1.73676e+08	2.15601e+08	2.86524e+07	5.93431e+07	6.85384e+07		1.66824	0.117227	2.07095	0.0406856	1.2414	0.453684
Q61171	Peroxiredoxin-2 OS=Mus musculus GN=Prdx2 PE=1 SV=3 - [PRDX2_MOUSE]	198	21.7651	5.41455	3.78185e+08	2.99549e+08	4.8938e+08	2.52019e+08	3.30756e+08	5.66734e+08	5.68282e+08	5.02522e+08	5.37433e+08	6.52624e+08	5.39093e+08	5.74192e+08		3.54783e+08	4.92073e+08	5.75836e+08	8.98265e+07	9.68433e+07	4.67007e+07		1.38697	0.121909	1.62306	0.00916095	1.17022	0.225901
Q9D855	Cytochrome b-c1 complex subunit 7 OS=Mus musculus GN=Uqcrb PE=1 SV=3 - [QCR7_MOUSE]	111	13.519	9.11475	4.21226e+07	8.82808e+07	7.33505e+07	7.85745e+07	8.32814e+07	7.52403e+07	1.10578e+08	1.10582e+08	9.12615e+07	2.60343e+08	1.12409e+08	1.23242e+08		7.05821e+07	9.49204e+07	1.46814e+08	1.72825e+07	1.59155e+07	6.65473e+07		1.34482	0.122925	2.08004	0.103209	1.5467	0.236972
P42125	Enoyl-CoA delta isomerase 1, mitochondrial OS=Mus musculus GN=Eci1 PE=1 SV=2 - [ECI1_MOUSE]	289	32.2298	8.98291	4.89174e+08	3.87607e+08	5.68161e+08	4.443e+08	8.83954e+08	6.7343e+08	1.08984e+09	3.73357e+08	5.46008e+08	7.02645e+08	6.04671e+08	7.92633e+08		4.72311e+08	7.55145e+08	6.61489e+08	6.60133e+07	2.65072e+08	9.415e+07		1.59883	0.123082	1.40054	0.0291969	0.875976	0.585126
Q9WTP6	Adenylate kinase 2, mitochondrial OS=Mus musculus GN=Ak2 PE=1 SV=5 - [KAD2_MOUSE]	239	26.4517	7.38623	5.20504e+08	4.20633e+08	4.17398e+08	4.19857e+08	5.38447e+08	6.75513e+08	6.51103e+08	3.99722e+08	4.49455e+08	5.25721e+08	4.97298e+08	5.20027e+08		4.44598e+08	5.66196e+08	4.98125e+08	4.38407e+07	1.09136e+08	3.00444e+07		1.2735	0.123525	1.12039	0.131704	0.879774	0.337746
O35945	Aldehyde dehydrogenase, cytosolic 1 OS=Mus musculus GN=Aldh1a7 PE=1 SV=1 - [AL1A7_MOUSE]	501	54.553	7.7085	2.34355e+08	1.43401e+08	3.73514e+08	2.47781e+08	3.89806e+08	1.39739e+09	5.51349e+08	4.08333e+08	1.1285e+09	1.10974e+09	5.64771e+08	4.24965e+08		2.49763e+08	6.86719e+08	8.06996e+08	8.1958e+07	4.1504e+08	3.16087e+08		2.74949	0.12383	3.23105	0.0254239	1.17515	0.703481
Q9CQ62	2,4-dienoyl-CoA reductase, mitochondrial OS=Mus musculus GN=Decr1 PE=1 SV=1 - [DECR_MOUSE]	335	36.1907	8.95361	8.0392e+08	3.86054e+08	7.23356e+08	7.79379e+08	9.54329e+08	9.95426e+08	1.08842e+09	6.39367e+08	5.37645e+08	1.01003e+09	5.81612e+08	8.01935e+08		6.73177e+08	9.19386e+08	7.32806e+08	1.68323e+08	1.68811e+08	1.88799e+08		1.36574	0.123847	1.08858	0.69721	0.79706	0.249118
P80313	T-complex protein 1 subunit eta OS=Mus musculus GN=Cct7 PE=1 SV=1 - [TCPH_MOUSE]	544	59.6141	7.84033	2.21598e+07	5.74483e+07	6.55592e+07	6.89917e+07	8.39554e+07	6.51554e+07	1.5766e+08	7.54609e+07	8.36392e+06	7.46123e+07	7.43412e+07	8.50567e+07		5.35397e+07	9.5558e+07	6.05935e+07	1.85958e+07	3.64676e+07	3.04627e+07		1.78481	0.125745	1.13175	0.743781	0.634102	0.249619
O88428	Bifunctional 3'-phosphoadenosine 5'-phosphosulfate synthase 2 OS=Mus musculus GN=Papss2 PE=1 SV=2 - [PAPS2_MOUSE]	621	70.3059	7.57666	2.06428e+07	8.37551e+07	1.22787e+08	4.6699e+07	9.19405e+07	8.98439e+07	1.4231e+08	1.36986e+08	7.54949e+07	1.51964e+08	164249985	1.48568e+08		6.8471e+07	1.1527e+08	1.35069e+08	3.85532e+07	2.44617e+07	3.48864e+07		1.68349	0.126193	1.97265	0.0683357	1.17176	0.451615
A3KMP2	Tetratricopeptide repeat protein 38 OS=Mus musculus GN=Ttc38 PE=1 SV=2 - [TTC38_MOUSE]	465	52.1903	6.30322	2.21429e+07	3.44724e+07	2.16685e+06	7.62188e+07	8.18938e+07	8.43076e+07	3.85758e+07	2.01809e+08	3.42738e+07	3.13078e+07	2.97488e+07	6.35608e+07		3.37502e+07	1.01646e+08	3.97228e+07	2.7094e+07	6.06241e+07	1.38585e+07		3.01173	0.126949	1.17696	0.745497	0.390794	0.135345
Q791V5	Mitochondrial carrier homolog 2 OS=Mus musculus GN=Mtch2 PE=1 SV=1 - [MTCH2_MOUSE]	303	33.477	8.25049	1.73348e+06	2.17163e+07	8.52535e+07	2.54109e+07	1.73348e+06	1.73348e+06	1.73348e+06	1.73348e+06	1.73348e+06	1.33351e+08	1.73348e+06	1.73348e+06		3.35285e+07	1.73348e+06	3.46378e+07	3.11922e+07	0	5.69919e+07		0.0517016	0.127914	1.03308	0.977368	19.9816	0.355918
P35700	Peroxiredoxin-1 OS=Mus musculus GN=Prdx1 PE=1 SV=1 - [PRDX1_MOUSE]	199	22.1624	8.11865	3.60518e+08	2.00251e+09	8.34884e+08	1.21725e+09	1.32889e+09	2.29321e+09	1.60099e+09	2.09866e+09	2.25503e+09	3.29415e+09	2.27734e+09	1.20708e+09		1.10379e+09	1.83044e+09	2.2584e+09	6.01112e+08	3.84154e+08	7.37973e+08		1.65832	0.128137	2.04604	0.080356	1.2338	0.407258
Q7TMF3	NADH dehydrogenase [ubiquinone] 1 alpha subcomplex subunit 12 OS=Mus musculus GN=Ndufa12 PE=1 SV=2 - [NDUAC_MOUSE]	145	17.0756	9.36377	8.58235e+06	866739	9.82461e+06	866739	2.05394e+07	1.6528e+07	866739	1.74006e+07	5.12795e+07	866739	866739	866739		5.03511e+06	1.38337e+07	1.34699e+07	4.19144e+06	7.63364e+06	2.18294e+07		2.74744	0.130703	2.6752	0.535401	0.973707	0.97915
Q99L04	Dehydrogenase/reductase SDR family member 1 OS=Mus musculus GN=Dhrs1 PE=1 SV=1 - [DHRS1_MOUSE]	313	33.9834	8.35303	1.09725e+08	1.71004e+08	2.32259e+08	2.67075e+08	8.66e+07	1.05135e+08	2.06066e+08	3.07829e+07	1.79504e+08	2.69268e+07	4.74478e+08	1.96297e+08		1.95016e+08	1.07146e+08	2.19301e+08	6.00637e+07	6.333e+07	1.61428e+08		0.549422	0.131835	1.12453	0.815202	2.04675	0.305434
Q9WUA2	Phenylalanine--tRNA ligase beta subunit OS=Mus musculus GN=Farsb PE=1 SV=2 - [SYFB_MOUSE]	589	65.6553	7.12256	1.44639e+07	1.73348e+06	1.73348e+06	1.73348e+06	8.40449e+07	2.94178e+07	1.73348e+06	2.71175e+07	1.73348e+06	1.02572e+08	1.73348e+06	7.23726e+07		4.91607e+06	3.55784e+07	4.4603e+07	5.51241e+06	3.00167e+07	4.41791e+07		7.23716	0.132473	9.07289	0.173546	1.25365	0.779645
Q99JY0	Trifunctional enzyme subunit beta, mitochondrial OS=Mus musculus GN=Hadhb PE=1 SV=1 - [ECHB_MOUSE]	475	51.3534	9.37842	8.49157e+08	7.90851e+08	5.30755e+08	1.02505e+09	1.09419e+09	1.07721e+09	1.44253e+09	7.71944e+08	1.24393e+09	1.25101e+09	1.00289e+09	9.77794e+08		7.98954e+08	1.09647e+09	1.11891e+09	1.77226e+08	2.37409e+08	1.28896e+08		1.37238	0.132626	1.40046	0.0447501	1.02046	0.89032
Q8VCU1	Carboxylesterase 3B OS=Mus musculus GN=Ces3b PE=1 SV=2 - [EST3B_MOUSE]	571	63.3125	5.92236	9.888e+07	1.93439e+08	2.55998e+08	2.14551e+08	4.68987e+07	2.2312e+08	5.68231e+07	6.65554e+07	3.99448e+07	2.16685e+06	2.27792e+08	3.44506e+07		1.90717e+08	9.83493e+07	7.60885e+07	5.76e+07	7.23707e+07	8.87671e+07		0.515682	0.134416	0.398961	0.109721	0.773656	0.747842
O09061	Proteasome subunit beta type-1 OS=Mus musculus GN=Psmb1 PE=1 SV=1 - [PSB1_MOUSE]	240	26.3553	7.81104	866739	866739	866739	866739	866739	4.02537e+07	866739	4.62196e+07	866739	6.14172e+07	866739	866739		866739	2.20517e+07	1.60043e+07	0	2.12897e+07	2.62191e+07		25.4421	0.135562	18.465	0.355918	0.725765	0.766953
Q8BJY1	26S proteasome non-ATPase regulatory subunit 5 OS=Mus musculus GN=Psmd5 PE=1 SV=4 - [PSMD5_MOUSE]	504	55.9369	5.21143	866739	866739	866739	866739	866739	866739	1.20342e+07	1.40322e+07	866739	5.81759e+06	866739	1.00598e+07		866739	6.94996e+06	4.40271e+06	0	6.1241e+06	3.84091e+06		8.01851	0.136132	5.07962	0.161926	0.633487	0.564035
Q8VDN2	Sodium/potassium-transporting ATPase subunit alpha-1 OS=Mus musculus GN=Atp1a1 PE=1 SV=1 - [AT1A1_MOUSE]	1023	112.91	5.45264	1.62441e+07	8.76711e+07	92336019	8.94476e+07	3.63062e+07	3.57138e+07	4.48972e+07	4.13993e+07	5.61693e+07	8.80938e+07	7.33333e+07	6.74082e+07		7.14247e+07	3.95791e+07	7.12512e+07	3.1902e+07	3.78312e+06	1.15135e+07		0.554138	0.136799	0.99757	0.993216	1.80022	0.00398975
P19639	Glutathione S-transferase Mu 3 OS=Mus musculus GN=Gstm3 PE=1 SV=2 - [GSTM4_MOUSE]	218	25.685	7.76709	7.32469e+07	7.4194e+07	1.13444e+08	1.01196e+08	1.32841e+08	5.60608e+08	2.00035e+08	1.59039e+08	3.96898e+08	6.77321e+07	6.10952e+08	7.35782e+08		9.05203e+07	2.63131e+08	4.52841e+08	1.73522e+07	1.7341e+08	2.53226e+08		2.90687	0.137074	5.00265	0.0482966	1.72097	0.325501
Q8JZZ0	UDP-glucuronosyltransferase 3A2 OS=Mus musculus GN=Ugt3a2 PE=1 SV=2 - [UD3A2_MOUSE]	523	59.6341	7.53271	866739	4.94732e+07	866739	6.07029e+07	866739	866739	866739	866739	1.76683e+07	866739	866739	866739		2.79774e+07	866739	5.06713e+06	2.73999e+07	0	7.27528e+06		0.03098	0.137402	0.181115	0.211114	5.84619	0.355918
Q91V76	Ester hydrolase C11orf54 homolog OS=Mus musculus PE=1 SV=1 - [CK054_MOUSE]	315	34.9733	6.29053	2.65014e+08	1.30288e+08	2.04745e+08	263999855	2.3547e+08	548894893	5.24181e+08	2.11313e+08	2.59558e+08	3.47758e+08	3.49882e+08	4.86846e+08		2.16012e+08	3.79965e+08	3.61011e+08	5.51805e+07	1.57049e+08	8.12816e+07		1.759	0.138893	1.67126	0.0431175	0.950117	0.858841
Q9QYG0	Protein NDRG2 OS=Mus musculus GN=Ndrg2 PE=1 SV=1 - [NDRG2_MOUSE]	371	40.7632	5.40186	2.65288e+08	3.73036e+08	3.93037e+08	3.43123e+08	4.19294e+08	4.58136e+08	4.41545e+08	3.29351e+08	4.34413e+08	5.38304e+08	3.38029e+08	3.74905e+08		3.43621e+08	4.12082e+08	4.21413e+08	4.85889e+07	4.97131e+07	7.5744e+07		1.19923	0.138924	1.22639	0.184964	1.02264	0.864291
Q9CQH3	NADH dehydrogenase [ubiquinone] 1 beta subcomplex subunit 5, mitochondrial OS=Mus musculus GN=Ndufb5 PE=1 SV=1 - [NDUB5_MOUSE]	189	21.6964	9.40771	1.30011e+06	1.30011e+06	1.30011e+06	1.30011e+06	1.30011e+06	1.20228e+08	9.09648e+07	1.30011e+06	9.50909e+07	1.28877e+08	1.30011e+06	1.30011e+06		1.30011e+06	5.34482e+07	5.6642e+07	0	5.31645e+07	5.66164e+07		41.1106	0.140245	43.5671	0.141387	1.05975	0.945532
Q9CZX8	40S ribosomal protein S19 OS=Mus musculus GN=Rps19 PE=1 SV=3 - [RS19_MOUSE]	145	16.0756	10.4038	1.05795e+08	9.07693e+07	2.45322e+08	1.19593e+08	2.39147e+08	3.30369e+08	2.09372e+08	1.41504e+08	1.66018e+08	4.66555e+08	1.0839e+08	1.32744e+08		1.4037e+08	2.30098e+08	2.18427e+08	6.14455e+07	6.78503e+07	1.4471e+08		1.63923	0.140464	1.55608	0.422835	0.949277	0.903483
O35643	AP-1 complex subunit beta-1 OS=Mus musculus GN=Ap1b1 PE=1 SV=2 - [AP1B1_MOUSE]	943	103.869	5.17334	2.69183e+07	1.84621e+07	3.24514e+07	1.86345e+07	8.85324e+07	2.99757e+07	4.46555e+07	2.96401e+07	7.63651e+07	5.16576e+07	4.10202e+07	1.23042e+08		2.41166e+07	4.82009e+07	7.30213e+07	5.90222e+06	2.40617e+07	3.15981e+07		1.99867	0.143212	3.02785	0.0387918	1.51494	0.320636
Q8BJ64	Choline dehydrogenase, mitochondrial OS=Mus musculus GN=Chdh PE=1 SV=1 - [CHDH_MOUSE]	596	66.3724	8.51416	9.75538e+07	8.10755e+07	8.40695e+07	122551587	2.2057e+08	4.40379e+07	1.92419e+08	2.19483e+08	1.74059e+08	1.91799e+08	1.80491e+08	1.85443e+08		9.63126e+07	1.69127e+08	1.82948e+08	1.63714e+07	7.30957e+07	6.51168e+06		1.75603	0.143229	1.89952	0.000143531	1.08172	0.755356
Q9CQ92	Mitochondrial fission 1 protein OS=Mus musculus GN=Fis1 PE=1 SV=1 - [FIS1_MOUSE]	152	16.998	8.52881	866739	5.42043e+06	2.72809e+07	866739	1.1444e+07	1.10584e+07	4.67076e+07	4.31092e+07	866739	4.80341e+07	1.06017e+07	1.33087e+07		8.6087e+06	2.80798e+07	1.82028e+07	1.09395e+07	1.68772e+07	1.78338e+07		3.26179	0.144592	2.11447	0.457294	0.648253	0.512044
Q3UPL0	Protein transport protein Sec31A OS=Mus musculus GN=Sec31a PE=1 SV=2 - [SC31A_MOUSE]	1230	133.486	6.75635	866739	866739	866739	7.85676e+06	1.09793e+07	8.30915e+06	866739	8.98933e+06	8.7481e+06	3.2834e+07	866739	9.82668e+06		2.61424e+06	7.28613e+06	1.30689e+07	3.02677e+06	3.83391e+06	1.19241e+07		2.78709	0.148679	4.9991	0.191457	1.79367	0.45439
Q99L20	Glutathione S-transferase theta-3 OS=Mus musculus OX=10090 GN=Gstt3 PE=1 SV=1 - [GSTT3_MOUSE]	241	27.3852	7.73779	1.27097e+08	8.70267e+07	5.75203e+07	66827995	5.46731e+07	866739	866739	9.74085e+07	866739	1.05086e+08	6.91029e+07	866739		8.4618e+07	3.84538e+07	4.39807e+07	2.67443e+07	4.05102e+07	4.49518e+07		0.45444	0.150614	0.519756	0.227035	1.14373	0.879491
Q91WS0	CDGSH iron-sulfur domain-containing protein 1 OS=Mus musculus GN=Cisd1 PE=1 SV=1 - [CISD1_MOUSE]	108	12.0892	9.05615	866739	866739	4.70881e+07	7.81015e+07	1.37672e+08	866739	1.19976e+08	1.06203e+08	866739	1.52565e+08	1.26903e+08	9.37439e+07		3.17308e+07	9.11795e+07	9.35197e+07	3.27539e+07	5.33218e+07	5.74139e+07		2.87353	0.150983	2.94729	0.156554	1.02567	0.960422
Q5XJY5	Coatomer subunit delta OS=Mus musculus GN=Arcn1 PE=1 SV=2 - [COPD_MOUSE]	511	57.1932	6.21436	866739	1.38507e+07	866739	2.21032e+07	866739	866739	866739	866739	4.32885e+07	4.66604e+07	866739	866739		9.42185e+06	866739	2.29206e+07	9.03896e+06	0	2.2086e+07		0.0919925	0.152255	2.43271	0.365054	26.4446	0.134443
P56395	Cytochrome b5 OS=Mus musculus GN=Cyb5a PE=1 SV=2 - [CYB5_MOUSE]	134	15.2315	5.07178	1.50341e+09	2.35354e+09	2.58251e+09	2.60014e+09	2.97005e+09	3.95365e+09	2.95549e+09	2.13122e+09	3302044580	4.26634e+09	2.37728e+09	4.34442e+09		2.2599e+09	3.0026e+09	3.57252e+09	4.47461e+08	6.4558e+08	8.02958e+08		1.32865	0.152597	1.58083	0.0482392	1.18981	0.375009
Q9WU19	Hydroxyacid oxidase 1 OS=Mus musculus GN=Hao1 PE=1 SV=1 - [HAOX1_MOUSE]	370	40.9753	7.72314	3.45378e+07	1.57493e+07	5.13348e+07	5.63413e+07	3.66574e+07	3.19242e+07	1.30011e+06	1.30011e+06	4.33105e+07	1.30011e+06	4.57756e+07	7.59402e+07		3.94908e+07	1.77955e+07	4.15816e+07	1.59092e+07	1.658e+07	2.65692e+07		0.450623	0.153094	1.05294	0.910725	2.33664	0.236374
Q9DBJ1	Phosphoglycerate mutase 1 OS=Mus musculus GN=Pgam1 PE=1 SV=3 - [PGAM1_MOUSE]	254	28.8139	7.18115	3.53219e+08	2.86852e+08	3.92829e+08	1.27513e+08	6.62378e+08	3.50922e+08	3.83787e+08	3.76201e+08	4.4647e+08	9.67389e+08	1.86014e+08	8.34135e+08		2.90103e+08	4.43322e+08	6.08502e+08	1.0122e+08	1.27056e+08	3.10024e+08		1.52815	0.153447	2.09754	0.141792	1.3726	0.42593
O35728	Cytochrome P450 4A14 OS=Mus musculus GN=Cyp4a14 PE=1 SV=1 - [CP4AE_MOUSE]	507	58.6821	8.77783	866739	1.28844e+07	1.46405e+07	6.00582e+07	866739	866739	866739	866739	866739	6.89393e+06	866739	2.30453e+07		2.21125e+07	866739	7.91817e+06	2.25402e+07	0	9.07364e+06		0.0391969	0.153678	0.358086	0.350673	9.13559	0.226919
Q9D0S9	Histidine triad nucleotide-binding protein 2, mitochondrial OS=Mus musculus GN=Hint2 PE=1 SV=1 - [HINT2_MOUSE]	163	17.3094	9.81787	866739	5.7127e+07	866739	6.95465e+07	866739	6.77605e+06	866739	866739	866739	1.1377e+08	866739	866739		3.21017e+07	2.34407e+06	2.90925e+07	3.15421e+07	2.55881e+06	4.88885e+07		0.0730199	0.154497	0.90626	0.931532	12.4111	0.380499
P32020	Non-specific lipid-transfer protein OS=Mus musculus GN=Scp2 PE=1 SV=3 - [NLTP_MOUSE]	547	59.0878	7.44482	2.33335e+09	1.31757e+09	1.44136e+09	3.03599e+09	2.47902e+09	2.88823e+09	2.77996e+09	2.65255e+09	2.3196e+09	1.86676e+09	1.44315e+09	2.05913e+09		2.03207e+09	2.69994e+09	1.92216e+09	6.99657e+08	1.52403e+08	3.1986e+08		1.32867	0.157331	0.945914	0.812812	0.711926	0.00894501
P97351	40S ribosomal protein S3a OS=Mus musculus GN=Rps3a PE=1 SV=3 - [RS3A_MOUSE]	264	29.8657	9.72998	1.52508e+08	1.6668e+08	2.55152e+08	1.99185e+08	3.66447e+08	2.97719e+08	1.29453e+08	3.73725e+08	9.12326e+07	4.01712e+08	2.5623e+08	2.16327e+08		1.93381e+08	2.91836e+08	2.41375e+08	3.94741e+07	9.83306e+07	1.10791e+08		1.50912	0.158654	1.24818	0.506203	0.827092	0.576711
P35980	60S ribosomal protein L18 OS=Mus musculus GN=Rpl18 PE=1 SV=3 - [RL18_MOUSE]	188	21.6312	11.7808	1.27672e+08	2.31382e+08	3.15875e+08	4.16909e+08	5.41226e+08	3.95744e+08	2.46204e+08	4.78411e+08	5.49415e+08	5.82641e+08	4.47378e+08	6.06711e+08		2.7296e+08	4.15396e+08	5.46536e+08	1.06537e+08	1.10472e+08	6.07561e+07		1.52182	0.159071	2.00226	0.00832717	1.3157	0.121681
P80314	T-complex protein 1 subunit beta OS=Mus musculus GN=Cct2 PE=1 SV=4 - [TCPB_MOUSE]	535	57.4411	6.40479	5.09149e+07	1.25314e+07	6.40644e+07	4.83502e+07	1.45998e+08	9.07908e+07	7.27122e+07	3.21802e+07	5.1355e+07	5.10162e+07	6.62452e+07	1.56727e+08		4.39653e+07	8.54204e+07	8.13358e+07	1.91023e+07	4.09101e+07	4.39592e+07		1.94291	0.16287	1.85	0.225579	0.952183	0.910061
O08601	Microsomal triglyceride transfer protein large subunit OS=Mus musculus GN=Mttp PE=1 SV=2 - [MTP_MOUSE]	894	99.0366	7.62061	5.78243e+08	4.89139e+08	5.83793e+08	5.57269e+08	5.47912e+08	6.42322e+08	6.41331e+08	5.77941e+08	6.64975e+08	5.5389e+08	7.37062e+08	1.25797e+09		5.52111e+08	6.02377e+08	8.03475e+08	3.76787e+07	4.08552e+07	2.70395e+08		1.09104	0.168267	1.45528	0.161881	1.33384	0.249882
Q9R257	Heme-binding protein 1 OS=Mus musculus GN=Hebp1 PE=1 SV=2 - [HEBP1_MOUSE]	190	21.0534	5.26221	8.75797e+07	9.37152e+07	1.35879e+08	1.23321e+08	1.38895e+08	3.01945e+08	1.98387e+08	9.19554e+07	1.69245e+08	3.64773e+08	1.79771e+08	1.99731e+08		1.10124e+08	1.82796e+08	2.2838e+08	2.00933e+07	7.84522e+07	7.95043e+07		1.65991	0.171116	2.07385	0.0466701	1.24937	0.506154
Q9DBE0	Cysteine sulfinic acid decarboxylase OS=Mus musculus GN=Csad PE=1 SV=1 - [CSAD_MOUSE]	493	55.1094	6.60986	1.19873e+08	3.04134e+08	2.16685e+06	3.46082e+07	2.16685e+06	3.45348e+07	2.16685e+06	2.16685e+06	2.16685e+06	2.16685e+06	1.23942e+07	2.16685e+06		1.15195e+08	1.02588e+07	4.72369e+06	1.17249e+08	1.40157e+07	4.42859e+06		0.089056	0.174678	0.0410059	0.15406	0.460451	0.538414
Q8R123	FAD synthase OS=Mus musculus GN=Flad1 PE=1 SV=1 - [FAD1_MOUSE]	492	54.732	6.63916	866739	866739	1.37826e+07	1.44323e+07	9.39671e+06	2.09987e+07	1.74796e+07	1.08999e+07	1.07618e+07	8.14139e+06	1.53532e+07	1.46626e+07		7.48709e+06	1.46937e+07	1.22298e+07	6.62433e+06	4.74248e+06	2.93873e+06		1.96254	0.176374	1.63345	0.300245	0.832313	0.473315
O55060	Thiopurine S-methyltransferase OS=Mus musculus GN=Tpmt PE=1 SV=1 - [TPMT_MOUSE]	240	27.5681	6.44287	2.4844e+07	4.52446e+07	5.13348e+07	3.33558e+07	3.98641e+07	1.79999e+08	7.53402e+07	5.59467e+07	5.54406e+07	3.95109e+07	5.0259e+07	8.067e+07		3.86948e+07	8.77874e+07	5.64701e+07	1.02837e+07	5.46999e+07	1.5107e+07		2.26871	0.177438	1.45937	0.143031	0.64326	0.376051
Q922R8	Protein disulfide-isomerase A6 OS=Mus musculus GN=Pdia6 PE=1 SV=3 - [PDIA6_MOUSE]	440	48.0703	5.13525	3.08982e+08	7.05812e+08	4.44156e+08	4.48282e+08	8.92066e+08	3.71848e+08	8.77689e+08	6.63708e+08	4.51312e+08	2.5272e+08	4.8886e+08	6.73541e+08		4.76808e+08	7.01328e+08	4.66608e+08	1.43604e+08	2.10628e+08	1.49414e+08		1.47088	0.177988	0.978608	0.934836	0.665321	0.166488
Q8BH00	Aldehyde dehydrogenase family 8 member A1 OS=Mus musculus GN=Aldh8a1 PE=1 SV=1 - [AL8A1_MOUSE]	487	53.6295	7.54736	5.66414e+08	6.95695e+08	6.67292e+08	6.0783e+08	9.85566e+08	3.16176e+09	9.74726e+08	8.29148e+08	2.57588e+09	6.41112e+08	1.3148e+09	1.26982e+09		6.34308e+08	1.4878e+09	1.4504e+09	5.04156e+07	9.68432e+08	7.02256e+08		2.34555	0.178245	2.28659	0.0914509	0.974865	0.958577
Q9D826	Peroxisomal sarcosine oxidase OS=Mus musculus GN=Pipox PE=1 SV=1 - [SOX_MOUSE]	390	43.8184	7.54736	2.32438e+08	1.24375e+08	1.61775e+08	1.04113e+08	1.8894e+08	3.15499e+08	2.88991e+08	1.36587e+08	2.46587e+08	1.49153e+08	2.6333e+08	2.16069e+08		1.55675e+08	2.32504e+08	2.18785e+08	4.89083e+07	7.27613e+07	4.36267e+07		1.49352	0.179848	1.40539	0.146389	0.940992	0.788809
Q99KK7	Dipeptidyl peptidase 3 OS=Mus musculus GN=Dpp3 PE=1 SV=2 - [DPP3_MOUSE]	738	82.8461	5.37646	866739	3.30636e+07	2.74903e+07	2.81087e+07	3.00484e+07	3.0231e+07	3.64446e+07	3.89405e+07	2.64111e+07	2.9278e+07	3.18347e+07	3.23169e+07		2.23823e+07	3.39161e+07	2.99602e+07	1.26085e+07	3.87868e+06	2.3521e+06		1.51531	0.180702	1.33856	0.345628	0.883361	0.181659
P47915	60S ribosomal protein L29 OS=Mus musculus GN=Rpl29 PE=2 SV=2 - [RL29_MOUSE]	160	17.5759	11.8394	1.44877e+07	1.48011e+07	2.04911e+07	1.89625e+07	2.42497e+07	1.50976e+07	5.97027e+07	2.89489e+07	1.72474e+07	2.73951e+07	2.17423e+07	2.67348e+07		1.71856e+07	3.19997e+07	2.32799e+07	2.60039e+06	1.67519e+07	4.11175e+06		1.862	0.180904	1.35461	0.0730936	0.727503	0.414927
Q5FW57	Glycine N-acyltransferase-like protein OS=Mus musculus GN=Gm4952 PE=1 SV=3 - [GLYAL_MOUSE]	296	34.1461	7.79639	9.74772e+07	1.30011e+06	1.30011e+06	4.29653e+07	1.30011e+06	1.30011e+06	1.30011e+06	1.30011e+06	1.30011e+06	1.30011e+06	1.30011e+06	1.30011e+06		3.57607e+07	1.30011e+06	1.30011e+06	3.94839e+07	0	0		0.0363558	0.181366	0.0363558	0.181366	1	#DIV/0!
Q80WJ7	Protein LYRIC OS=Mus musculus GN=Mtdh PE=1 SV=1 - [LYRIC_MOUSE]	579	63.8077	9.33447	1.98968e+07	866739	2.3957e+07	2.01429e+07	2.1833e+07	2.39827e+07	3.15098e+07	2.18623e+07	3.06887e+07	2.36796e+07	3.02377e+07	2.92115e+07		1.62159e+07	2.4797e+07	2.84544e+07	9.00683e+06	3.97248e+06	2.8082e+06		1.52918	0.181823	1.75473	0.0657256	1.1475	0.240608
P21614	Vitamin D-binding protein OS=Mus musculus GN=Gc PE=1 SV=2 - [VTDB_MOUSE]	476	53.565	5.50342	5.39624e+07	866739	4.54812e+07	3.69228e+07	1.97664e+07	1.85515e+07	2.17643e+07	866739	1.70733e+07	4.00489e+07	34346611	866739		3.43083e+07	1.52372e+07	2.30839e+07	2.02255e+07	8.37574e+06	1.53655e+07		0.444127	0.182054	0.672838	0.473059	1.51497	0.466887
P62960	Nuclease-sensitive element-binding protein 1 OS=Mus musculus GN=Ybx1 PE=1 SV=3 - [YBOX1_MOUSE]	322	35.7086	9.87646	866739	9.72618e+06	9.94373e+06	1.10845e+07	1.62578e+07	1.0542e+07	7.18733e+06	2.359e+07	1.86238e+07	2.51233e+07	1.93597e+07	7.75623e+06		7.90529e+06	1.43943e+07	1.77158e+07	4.09633e+06	6.22122e+06	6.27677e+06		1.82084	0.182063	2.241	0.063923	1.23075	0.53918
O08795	Glucosidase 2 subunit beta OS=Mus musculus GN=Prkcsh PE=1 SV=1 - [GLU2B_MOUSE]	521	58.7558	4.4624	1.30011e+06	2.70957e+07	2.94611e+07	1.30011e+06	5.57086e+07	4.85705e+07	1.30011e+06	3.97379e+07	6.89485e+07	4.63542e+07	1.30011e+06	3.98838e+07		1.47893e+07	3.63293e+07	3.91217e+07	1.35151e+07	2.10004e+07	2.43567e+07		2.45646	0.185813	2.64527	0.181042	1.07686	0.885386
Q64458	Cytochrome P450 2C29 OS=Mus musculus GN=Cyp2c29 PE=1 SV=2 - [CP2CT_MOUSE]	490	55.6798	8.29443	1.16383e+09	5.04119e+08	7.65883e+08	9.00945e+08	1.53927e+09	9.67991e+08	2.04909e+09	7.23148e+08	1.66921e+09	8.54533e+08	1.28908e+09	1.33828e+09		8.33693e+08	1.31987e+09	1.28778e+09	2.3808e+08	5.14731e+08	2.89718e+08		1.58317	0.188124	1.54466	0.0807715	0.97568	0.928074
O09174	Alpha-methylacyl-CoA racemase OS=Mus musculus GN=Amacr PE=1 SV=4 - [AMACR_MOUSE]	381	41.6775	7.40088	1.2364e+08	4.40642e+07	8.28821e+07	8.74123e+07	1.46827e+08	1.29375e+08	5.97894e+07	2.35688e+08	3.87399e+07	2.66971e+08	5.3671e+07	1.3708e+08		8.44998e+07	1.4292e+08	1.24116e+08	2.81874e+07	6.26803e+07	9.05914e+07		1.69137	0.191358	1.46883	0.496753	0.868427	0.777456
Q91YQ5	Dolichyl-diphosphooligosaccharide--protein glycosyltransferase subunit 1 OS=Mus musculus GN=Rpn1 PE=1 SV=1 - [RPN1_MOUSE]	608	68.4857	6.45557	4.02119e+07	9.28952e+07	1.77218e+08	2.81e+08	4.80699e+08	1.99063e+08	2.86836e+08	1.49904e+08	2.82332e+08	3.60873e+08	1.55169e+08	1.08879e+08		1.47831e+08	2.79126e+08	2.26813e+08	9.11007e+07	1.26293e+08	1.00119e+08		1.88814	0.194491	1.53427	0.351205	0.812584	0.594338
P34928	Apolipoprotein C-I OS=Mus musculus GN=Apoc1 PE=1 SV=1 - [APOC1_MOUSE]	88	9.69031	9.08545	5.81151e+07	866739	866739	866739	866739	7.66484e+07	8.3828e+07	3.74725e+07	866739	866739	866739	8.78758e+07		1.51788e+07	4.97039e+07	2.2619e+07	2.47893e+07	3.32608e+07	3.7676e+07		3.27455	0.199513	1.49017	0.784687	0.455075	0.386611
Q9CR68	Cytochrome b-c1 complex subunit Rieske, mitochondrial OS=Mus musculus GN=Uqcrfs1 PE=1 SV=1 - [UCRI_MOUSE]	274	29.3492	8.70459	1.77361e+08	1.17549e+08	1.65566e+08	1.50273e+08	1.19398e+08	1.3743e+08	1.50004e+08	1.169e+08	2.89731e+08	3.67261e+08	1.22798e+08	2.70684e+08		1.52687e+08	1.30933e+08	2.62619e+08	2.24453e+07	1.35636e+07	8.84588e+07		0.857525	0.200817	1.71998	0.0820076	2.00575	0.0435691
Q9CRB9	MICOS complex subunit Mic19 OS=Mus musculus GN=Chchd3 PE=1 SV=1 - [MIC19_MOUSE]	227	26.3182	8.36768	1.30011e+06	1.30011e+06	1.30011e+06	1.55556e+07	1.72529e+07	2.53666e+07	9.25943e+07	1.30011e+06	1.30011e+06	3.69499e+07	1.30011e+06	4.35806e+07		4.86398e+06	3.41285e+07	2.07827e+07	6.17281e+06	3.48479e+07	1.96231e+07		7.01658	0.202045	4.27277	0.22866	0.608954	0.584295
Q64310	Surfeit locus protein 4 OS=Mus musculus GN=Surf4 PE=1 SV=1 - [SURF4_MOUSE]	269	30.3608	7.78174	2.75794e+07	866739	4.79417e+07	866739	866739	866739	866739	8.39746e+06	866739	866739	866739	866739		1.93136e+07	2.74942e+06	866739	1.98019e+07	3.2609e+06	0		0.142356	0.202769	0.0448771	0.157757	0.315245	0.355918
Q91Z53	Glyoxylate reductase/hydroxypyruvate reductase OS=Mus musculus GN=Grhpr PE=1 SV=1 - [GRHPR_MOUSE]	328	35.3065	7.6499	2.83982e+08	3.96793e+08	4.05009e+08	4.33485e+08	5.35282e+08	5.1427e+08	4.74e+08	3.24556e+08	3.99292e+08	3.60297e+08	2.75638e+08	4.64712e+08		3.79817e+08	4.62027e+08	3.74985e+08	5.69813e+07	8.23666e+07	6.84238e+07		1.21645	0.204946	0.987277	0.928171	0.811608	0.208794
Q63886	UDP-glucuronosyltransferase 1-1 OS=Mus musculus GN=Ugt1a1 PE=1 SV=2 - [UD11_MOUSE]	535	60.008	8.6167	2.93069e+08	2.13903e+08	3.51863e+08	2.7885e+08	3.51188e+08	9.45583e+07	2.16685e+06	2.27001e+08	3.69381e+08	2.97084e+08	1.0943e+08	1.32754e+08		2.84421e+08	1.68729e+08	2.27163e+08	4.90589e+07	1.32223e+08	1.09418e+08		0.593235	0.205179	0.798683	0.439848	1.34632	0.576896
P16015	Carbonic anhydrase 3 OS=Mus musculus GN=Ca3 PE=1 SV=3 - [CAH3_MOUSE]	260	29.3476	7.37158	1.34809e+10	1.02856e+10	9.67731e+09	8.21111e+09	1.48456e+10	1.33574e+10	1.53671e+10	8.70381e+09	9.91836e+09	8.82373e+09	1.2024e+10	9.49362e+09		1.04137e+10	1.30685e+10	1.00649e+10	1.92469e+09	2.62563e+09	1.19651e+09		1.25493	0.207531	0.966507	0.798727	0.770169	0.121452
P26039	Talin-1 OS=Mus musculus GN=Tln1 PE=1 SV=2 - [TLN1_MOUSE]	2541	269.653	6.17627	2.13904e+07	3.04772e+07	4.50058e+07	2.70149e+07	2.22512e+07	2.01597e+07	2.83023e+07	2.31892e+07	2.03016e+07	4.765e+07	2.20054e+07	6.45329e+07		3.09721e+07	2.34756e+07	3.86225e+07	8.72725e+06	2.99473e+06	1.84704e+07		0.757961	0.208992	1.24701	0.540581	1.64522	0.210451
Q8QZY2	Glycerate kinase OS=Mus musculus GN=Glyctk PE=1 SV=1 - [GLCTK_MOUSE]	523	55.2583	6.66846	1.08787e+07	2.68501e+07	2.67544e+07	25616425	1.15321e+08	8.31372e+07	1.81785e+07	1.43765e+07	9.43486e+07	5.91532e+07	1.73348e+06	8.27156e+07		2.25249e+07	5.77533e+07	5.94877e+07	6.74144e+06	4.30293e+07	3.56738e+07		2.56398	0.21077	2.64098	0.128286	1.03003	0.958881
Q61792	LIM and SH3 domain protein 1 OS=Mus musculus GN=Lasp1 PE=1 SV=1 - [LASP1_MOUSE]	263	29.9753	7.04932	1.57091e+07	866739	1.87794e+07	2.23191e+07	7.42039e+06	1.96559e+07	4.04156e+07	5.31093e+07	1.7718e+07	4.97381e+07	2.16019e+07	2.97097e+07		1.44186e+07	3.01503e+07	2.96919e+07	8.16628e+06	1.77431e+07	1.23559e+07		2.09107	0.212458	2.05928	0.124312	0.984798	0.971902
Q6ZQ38	Cullin-associated NEDD8-dissociated protein 1 OS=Mus musculus GN=Cand1 PE=1 SV=2 - [CAND1_MOUSE]	1230	136.245	5.78271	7.5991e+07	7.90196e+07	1.00024e+08	9.39918e+07	7.811e+07	9.48507e+07	1.22553e+08	1.20735e+08	9.2166e+07	9.74168e+07	1.18285e+08	1.32289e+08		8.72565e+07	1.04062e+08	1.10039e+08	1.00389e+07	1.85624e+07	1.61388e+07		1.1926	0.217001	1.2611	0.0831705	1.05744	0.688489
Q60865	Caprin-1 OS=Mus musculus GN=Caprin1 PE=1 SV=2 - [CAPR1_MOUSE]	707	78.1208	5.24951	9.51253e+06	1.35366e+07	2.0283e+07	1.44247e+07	1.61327e+07	1.39612e+07	2.17883e+07	3.95027e+07	2.47348e+07	3.90006e+07	3.84284e+07	2.46177e+07		1.44392e+07	2.28462e+07	3.16954e+07	3.84827e+06	1.00321e+07	7.02218e+06		1.58223	0.224151	2.19509	0.0097072	1.38734	0.257282
Q9CZ30	Obg-like ATPase 1 OS=Mus musculus GN=Ola1 PE=1 SV=1 - [OLA1_MOUSE]	396	44.7013	7.81104	866739	2.01354e+07	2.20297e+07	2.27785e+07	2.07254e+07	2.31081e+07	2.72384e+07	2.38968e+07	1.86641e+07	1.92215e+07	866739	6.8329e+07		1.64526e+07	2.37422e+07	2.67703e+07	9.04991e+06	2.33187e+06	2.51038e+07		1.44307	0.225409	1.62712	0.527972	1.12754	0.842086
Q9ESB3	Histidine-rich glycoprotein OS=Mus musculus GN=Hrg PE=1 SV=2 - [HRG_MOUSE]	525	59.1256	7.66455	1.47456e+07	1.86839e+07	4.13504e+07	3.21875e+07	3.43398e+07	3.01805e+07	7.0025e+07	3.30033e+07	5.88765e+07	4.79143e+07	3.34368e+07	7.33134e+07		2.67418e+07	4.18872e+07	5.33852e+07	1.0629e+07	1.63146e+07	1.46215e+07		1.56635	0.22656	1.99632	0.0433214	1.2745	0.398369
Q3UZZ6	Sulfotransferase 1 family member D1 OS=Mus musculus GN=Sult1d1 PE=1 SV=1 - [ST1D1_MOUSE]	295	35.0605	5.75732	5.65226e+07	2.16685e+06	7.03372e+07	1.07126e+08	9.35495e+06	6.40319e+07	7.45635e+06	1.81237e+07	2.16685e+06	9.13733e+07	2.16685e+06	6.31594e+07		5.90382e+07	2.47417e+07	3.97166e+07	3.76856e+07	2.30383e+07	3.88521e+07		0.419079	0.227268	0.672727	0.559107	1.60525	0.586682
Q91X77	Cytochrome P450 2C50 OS=Mus musculus GN=Cyp2c50 PE=1 SV=2 - [CY250_MOUSE]	490	55.7288	7.88428	2.27083e+08	1.52464e+08	2.56985e+08	2.17075e+08	1.57909e+08	1.15478e+08	2.64662e+08	1.73348e+06	3.55559e+08	1.73348e+06	1.73348e+06	2.94518e+08		2.13402e+08	1.34946e+08	1.63386e+08	3.81235e+07	9.41782e+07	1.63087e+08		0.632355	0.229535	0.765626	0.623493	1.21075	0.802402
P14211	Calreticulin OS=Mus musculus GN=Calr PE=1 SV=1 - [CALR_MOUSE]	416	47.9649	4.48779	5.75144e+08	8.3861e+08	9.71234e+08	8.02794e+08	1.13635e+09	8.58573e+08	7.55783e+08	1.09276e+09	5.87797e+08	9.18195e+08	7.92241e+08	9.55452e+08		7.96945e+08	9.60866e+08	8.13421e+08	1.42603e+08	1.58676e+08	1.43619e+08		1.20569	0.231583	1.02067	0.892486	0.84655	0.277805
P14115	60S ribosomal protein L27a OS=Mus musculus GN=Rpl27a PE=1 SV=5 - [RL27A_MOUSE]	148	16.595	11.1216	3.82917e+08	1.27128e+08	1.50784e+08	1.46307e+08	9.96771e+07	3.31775e+08	4.6918e+08	4.71914e+08	3.48039e+08	1.30011e+06	1.68032e+08	2.6454e+08		2.01784e+08	3.43137e+08	1.95478e+08	1.04954e+08	1.51552e+08	1.28941e+08		1.70051	0.23243	0.968748	0.949753	0.56968	0.246066
Q9CXF0	Kynureninase OS=Mus musculus GN=Kynu PE=1 SV=3 - [KYNU_MOUSE]	464	52.2919	6.56592	1.30011e+06	1.30011e+06	1.30011e+06	1.30011e+06	210805332	1.30011e+06	5.2529e+07	1.30011e+06	1.02432e+08	1.41171e+08	1.30011e+06	1.30011e+06		1.30011e+06	6.64836e+07	6.15506e+07	0	8.59088e+07	6.17876e+07		51.137	0.236783	47.3427	0.142189	0.925801	0.938273
A2AS89	Agmatinase, mitochondrial OS=Mus musculus GN=Agmat PE=1 SV=1 - [SPEB_MOUSE]	358	38.2306	7.86963	8.1591e+07	1.17468e+08	1.41829e+08	1.35478e+08	3.26223e+08	2.24078e+08	2.03994e+08	4.0214e+07	1.95965e+08	1.36647e+08	1.75173e+08	3.82374e+08		1.19091e+08	1.98627e+08	2.2254e+08	2.34223e+07	1.02533e+08	9.47025e+07		1.66786	0.238167	1.86865	0.115913	1.12039	0.776672
Q9WV68	Peroxisomal 2,4-dienoyl-CoA reductase OS=Mus musculus GN=Decr2 PE=1 SV=1 - [DECR2_MOUSE]	292	31.2803	8.80713	1.10341e+08	7.73963e+07	1.01754e+08	7.53878e+07	1.59272e+08	1.44243e+08	1.54178e+08	4.97033e+07	6.57932e+07	4.00623e+08	9.80763e+07	6.80953e+07		9.12198e+07	1.26849e+08	1.58147e+08	1.5152e+07	4.48668e+07	1.40572e+08		1.39059	0.2403	1.73369	0.44362	1.24673	0.725947
P68254	14-3-3 protein theta OS=Mus musculus GN=Ywhaq PE=1 SV=1 - [1433T_MOUSE]	245	27.7608	4.77979	9.76989e+07	1.83345e+08	1.66126e+08	1.33377e+08	1.74417e+08	1.1733e+08	214966075	2.48626e+08	173610769	2.19127e+08	2.10321e+08	2.08749e+08		1.45137e+08	1.88835e+08	2.02952e+08	3.27454e+07	4.89354e+07	1.73957e+07		1.30108	0.246025	1.39835	0.0355441	1.07476	0.654402
E9PV24	Fibrinogen alpha chain OS=Mus musculus GN=Fga PE=1 SV=1 - [FIBA_MOUSE]	789	87.3753	6.11279	2.16685e+06	2.16685e+06	7.82047e+07	2.91925e+07	8.48617e+07	5.61471e+07	1.75548e+08	2.16685e+06	8.09281e+07	9.53099e+08	4.37845e+07	2.16685e+06		2.79327e+07	7.96809e+07	2.69995e+08	3.10508e+07	6.28084e+07	3.95373e+08		2.8526	0.24805	9.66589	0.331129	3.38845	0.441771
O35166	Golgi SNAP receptor complex member 2 OS=Mus musculus GN=Gosr2 PE=1 SV=2 - [GOSR2_MOUSE]	212	24.7098	8.20654	866739	1.3325e+07	9.32609e+06	1.59153e+07	8.05785e+06	9.29655e+06	866739	866739	1.21355e+07	1.37153e+07	866739	1.36761e+07		9.85829e+06	4.77197e+06	1.00984e+07	5.6973e+06	3.92971e+06	5.36785e+06		0.484057	0.250155	1.02436	0.95935	2.1162	0.214833
Q9DBL1	Short/branched chain specific acyl-CoA dehydrogenase, mitochondrial OS=Mus musculus GN=Acadsb PE=1 SV=1 - [ACDSB_MOUSE]	432	47.8433	7.86963	1.01885e+08	1.24425e+08	1.12793e+08	1.19579e+08	1.09031e+08	1.12579e+08	1.44487e+08	1.64026e+08	7.64845e+07	1.31113e+08	108594464	1.05586e+08		1.1467e+08	1.3253e+08	1.05444e+08	8.45908e+06	2.2832e+07	1.94132e+07		1.15575	0.250953	0.919543	0.479039	0.795624	0.168527
Q91WL5	Cytochrome P450 4A12A OS=Mus musculus GN=Cyp4a12a PE=1 SV=2 - [CP4CA_MOUSE]	508	58.3123	9.12939	866739	1.97432e+07	3.35641e+07	2.70154e+07	2.66179e+07	2.76003e+07	6.08174e+07	2.31977e+07	2.81885e+07	866739	3.53463e+07	3.06801e+07		2.02974e+07	3.45583e+07	2.37704e+07	1.22372e+07	1.52485e+07	1.34707e+07		1.7026	0.253331	1.17111	0.752232	0.687835	0.393854
P97371	Proteasome activator complex subunit 1 OS=Mus musculus GN=Psme1 PE=1 SV=2 - [PSME1_MOUSE]	249	28.655	5.97314	1.1051e+08	1.4232e+08	2.81678e+08	1.70891e+08	1.0287e+08	5.78012e+08	1.50089e+08	5.13536e+08	4.18306e+08	4.16278e+08	2.48833e+08	3.75273e+08		1.7635e+08	3.36126e+08	3.64673e+08	6.44532e+07	2.11543e+08	6.90484e+07		1.90602	0.257364	2.06789	0.013578	1.08493	0.831535
Q9Z2W0	Aspartyl aminopeptidase OS=Mus musculus GN=Dnpep PE=1 SV=2 - [DNPEP_MOUSE]	473	52.1738	7.25439	5.74143e+07	5.57358e+07	8.86877e+07	5.36098e+07	6.88206e+07	6.69922e+07	7.58315e+07	9.90696e+07	5.57792e+07	9.75704e+07	9.67346e+07	1.25228e+08		6.38619e+07	7.76785e+07	9.3828e+07	1.43964e+07	1.27833e+07	2.47796e+07		1.21635	0.26024	1.46923	0.120091	1.2079	0.354492
Q8BWP5	Alpha-tocopherol transfer protein OS=Mus musculus GN=Ttpa PE=1 SV=1 - [TTPA_MOUSE]	278	31.9937	8.36768	4.35051e+07	3.14942e+07	8.4523e+07	5.61318e+07	1.1228e+08	1.03713e+08	5.63964e+07	4.41262e+07	1.37017e+08	5.62004e+07	4.91475e+07	1.81254e+08		5.39135e+07	7.91289e+07	1.05905e+08	1.97029e+07	2.93485e+07	5.5537e+07		1.4677	0.262814	1.96435	0.177338	1.33838	0.488184
P36552	Oxygen-dependent coproporphyrinogen-III oxidase, mitochondrial OS=Mus musculus GN=Cpox PE=1 SV=2 - [HEM6_MOUSE]	443	49.6828	8.52881	7.76436e+07	866739	4.01019e+07	4.45961e+07	1.12958e+08	8.47374e+07	1.21014e+08	866739	1.08581e+08	6.82851e+07	9.23242e+07	1.33612e+08		4.08021e+07	7.98939e+07	1.00701e+08	2.72352e+07	4.75731e+07	2.38023e+07		1.95808	0.262937	2.46802	0.0284909	1.26043	0.523357
P19253	60S ribosomal protein L13a OS=Mus musculus GN=Rpl13a PE=1 SV=4 - [RL13A_MOUSE]	203	23.4493	11.019	7.22516e+07	9.64725e+07	9.37471e+07	1.06242e+08	1.25137e+08	7.47269e+07	1.22435e+08	1.1379e+08	9.27272e+07	1.38584e+08	1.11413e+08	1.42756e+08		9.21783e+07	1.09022e+08	1.2137e+08	1.24073e+07	2.0239e+07	2.04523e+07		1.18273	0.265105	1.31669	0.0789747	1.11326	0.485376
Q8CC86	Nicotinate phosphoribosyltransferase OS=Mus musculus GN=Naprt PE=1 SV=1 - [PNCB_MOUSE]	538	58.2284	6.45557	9.87483e+06	7.43809e+07	866739	866739	4.86898e+07	6.95937e+07	1.04357e+08	866739	4.72762e+07	1.05748e+08	8.15035e+07	8.22325e+07		2.14973e+07	5.58768e+07	7.91899e+07	3.0753e+07	3.74708e+07	2.08471e+07		2.59925	0.265287	3.68371	0.0360724	1.41722	0.382701
Q99K51	Plastin-3 OS=Mus musculus GN=Pls3 PE=1 SV=3 - [PLST_MOUSE]	630	70.6972	5.61768	4.01228e+07	3.9198e+07	5.2688e+07	2.60255e+07	6.64755e+07	6.71409e+07	7.66413e+07	1.79342e+07	7.55545e+07	1.93656e+08	4.72663e+07	2.92463e+07		3.95086e+07	5.7048e+07	8.64307e+07	9.43352e+06	2.29376e+07	6.40691e+07		1.44394	0.266522	2.18764	0.256157	1.51505	0.48282
P55096	ATP-binding cassette sub-family D member 3 OS=Mus musculus GN=Abcd3 PE=1 SV=2 - [ABCD3_MOUSE]	659	75.4263	9.26123	6.72252e+08	7.46983e+08	7.12021e+08	5.13495e+08	6.56483e+08	8.28235e+08	1.33484e+09	6.52845e+08	8.98215e+08	6.37194e+08	9.11825e+08	1.42445e+09		6.61188e+08	8.68101e+08	9.67921e+08	8.92753e+07	2.78635e+08	2.85397e+08		1.31294	0.266525	1.46391	0.12596	1.11499	0.679823
P48776	Tryptophan 2,3-dioxygenase OS=Mus musculus GN=Tdo2 PE=1 SV=2 - [T23O_MOUSE]	406	47.7262	6.81494	1.72431e+07	866739	866739	866739	4.44754e+07	3.07602e+07	866739	866739	866739	1.1554e+08	866739	866739		4.96083e+06	1.92423e+07	2.95349e+07	7.09117e+06	1.90046e+07	4.96548e+07		3.87884	0.268426	5.95363	0.428664	1.5349	0.748806
P47754	F-actin-capping protein subunit alpha-2 OS=Mus musculus GN=Capza2 PE=1 SV=3 - [CAZA2_MOUSE]	286	32.9466	5.84619	1.30011e+06	2.10705e+07	1.75743e+07	2.03336e+07	8.45624e+07	1.3057e+08	1.30011e+06	1.30011e+06	1.65362e+08	1.30011e+06	6.14108e+07	1.05126e+08		1.50696e+07	5.44333e+07	8.32997e+07	8.05593e+06	5.55673e+07	6.00285e+07		3.61212	0.270259	5.52766	0.0988938	1.53031	0.563473
Q8VDW0	ATP-dependent RNA helicase DDX39A OS=Mus musculus GN=Ddx39a PE=1 SV=1 - [DX39A_MOUSE]	427	49.0359	5.68115	1.30011e+06	1.27468e+07	1.30011e+06	2.07679e+07	1.30011e+06	1.30011e+06	5.84408e+07	5.75479e+07	7.24255e+07	1.30011e+06	7.17479e+07	1.2547e+08		9.02873e+06	2.96472e+07	6.77359e+07	8.23249e+06	2.83489e+07	4.41164e+07		3.28365	0.271866	7.50225	0.0640374	2.28473	0.255117
Q9CQA3	Succinate dehydrogenase [ubiquinone] iron-sulfur subunit, mitochondrial OS=Mus musculus GN=Sdhb PE=1 SV=1 - [SDHB_MOUSE]	282	31.7929	8.67529	1.44519e+08	1.75402e+08	3.13241e+08	2.63346e+08	3.80391e+08	2.53245e+08	2.8171e+08	2.28591e+08	1.37711e+08	6.54987e+08	2.80977e+08	3.39765e+08		2.24127e+08	2.85984e+08	3.5336e+08	6.7437e+07	5.76556e+07	1.89016e+08		1.27599	0.272649	1.57661	0.307361	1.23559	0.576381
Q61316	Heat shock 70 kDa protein 4 OS=Mus musculus GN=Hspa4 PE=1 SV=1 - [HSP74_MOUSE]	841	94.0733	5.23682	1.30011e+06	1.30011e+06	1.72799e+07	2.73533e+07	1.0818e+07	1.30011e+06	1.30011e+06	1.30011e+06	4.4613e+07	1.30011e+06	3.60698e+07	9.07945e+06		1.18084e+07	3.67958e+06	2.27656e+07	1.10954e+07	4.12137e+06	1.80443e+07		0.311608	0.279162	1.92792	0.404792	6.18701	0.124331
P01837	Immunoglobulin kappa constant OS=Mus musculus OX=10090 GN=Igkc PE=1 SV=2 - [IGKC_MOUSE]	107	11.9267	5.89697	866739	866739	866739	866739	866739	866739	5.39346e+07	7.57417e+06	866739	1.21138e+08	866739	866739		866739	1.58106e+07	3.09346e+07	0	2.21806e+07	5.20791e+07		18.2414	0.28751	35.6908	0.355918	1.95658	0.659835
P50171	Estradiol 17-beta-dehydrogenase 8 OS=Mus musculus GN=Hsd17b8 PE=1 SV=2 - [DHB8_MOUSE]	259	26.5716	6.53662	866739	866739	1.70523e+07	866739	3.00682e+07	866739	3.2875e+07	866739	866739	3.17169e+07	3.35634e+07	3.72476e+07		4.91312e+06	1.61692e+07	2.58487e+07	7.00853e+06	1.53346e+07	1.45601e+07		3.29102	0.291503	5.26115	0.0659807	1.59864	0.458063
Q9DB20	ATP synthase subunit O, mitochondrial OS=Mus musculus GN=Atp5o PE=1 SV=1 - [ATPO_MOUSE]	213	23.3487	9.99365	2.04042e+08	2.64502e+08	2.82994e+08	2.28014e+08	5.64122e+08	2.51385e+08	2.84694e+08	2.41484e+08	4.22082e+08	2.87023e+08	3.99847e+08	3.30601e+08		2.44888e+08	3.35421e+08	3.59888e+08	3.07811e+07	1.33007e+08	5.39257e+07		1.36969	0.294444	1.4696	0.0184156	1.07294	0.777739
Q63880	Carboxylesterase 3A OS=Mus musculus GN=Ces3a PE=1 SV=2 - [EST3A_MOUSE]	571	63.2774	6.13818	9.8073e+08	7.07174e+08	1.57065e+09	1.81479e+09	1.03678e+09	4.87625e+08	1.18565e+09	1.00305e+09	5.98415e+08	4.23831e+08	8.08957e+08	7.6996e+08		1.26834e+09	9.28276e+08	6.50291e+08	4.43742e+08	2.63523e+08	1.52865e+08		0.731885	0.297251	0.512712	0.0627256	0.700536	0.165087
P53657	Pyruvate kinase PKLR OS=Mus musculus GN=Pklr PE=1 SV=1 - [KPYR_MOUSE]	574	62.2696	7.09326	1.01029e+09	1.03683e+09	1.00805e+09	8.77188e+08	6.07594e+08	1.28848e+09	7.97554e+08	1.58308e+08	3.2501e+08	5.96323e+07	6.75915e+08	4.28668e+08		9.83092e+08	7.12985e+08	3.72306e+08	6.2183e+07	4.05316e+08	2.20996e+08		0.725247	0.29739	0.37871	0.00366085	0.52218	0.248403
P00920	Carbonic anhydrase 2 OS=Mus musculus GN=Ca2 PE=1 SV=4 - [CAH2_MOUSE]	260	29.0145	7.00537	7.38898e+07	3.87133e+07	1.0747e+08	4.30337e+07	8.32931e+07	4.85285e+07	2.53712e+08	9.55812e+07	8.92317e+07	2.22233e+08	7.28812e+07	1.64276e+08		6.57768e+07	1.20279e+08	1.37156e+08	2.76308e+07	7.89469e+07	6.00032e+07		1.82859	0.302157	2.08517	0.110446	1.14031	0.778091
Q91WN4	Kynurenine 3-monooxygenase OS=Mus musculus GN=Kmo PE=1 SV=1 - [KMO_MOUSE]	479	54.4957	8.88037	1.6751e+08	1.72387e+08	2.55397e+08	1.1692e+08	2.43617e+08	1.11124e+08	3.01732e+08	2.89585e+08	1.38919e+08	2.24215e+08	2.17882e+08	2.45893e+08		1.78053e+08	2.36515e+08	2.06727e+08	4.96551e+07	7.55694e+07	4.05038e+07		1.32834	0.305603	1.16104	0.467745	0.874057	0.56937
Q61425	Hydroxyacyl-coenzyme A dehydrogenase, mitochondrial OS=Mus musculus GN=Hadh PE=1 SV=2 - [HCDH_MOUSE]	314	34.4419	8.646	6.94659e+08	1.03199e+09	1.17809e+09	1.49282e+09	1.26696e+09	1.19577e+09	2.13867e+09	1.10214e+09	1.11238e+09	1.5235e+09	1.51935e+09	2.01805e+09		1.09939e+09	1.42588e+09	1.54332e+09	2.86937e+08	4.15659e+08	3.20955e+08		1.29698	0.305679	1.40379	0.124338	1.08236	0.711883
Q5FW60	Major urinary protein 20 OS=Mus musculus GN=Mup20 PE=1 SV=1 - [MUP20_MOUSE]	181	20.9165	4.89404	6.39083e+07	2.56386e+08	1.77276e+08	7.11854e+08	6.79945e+07	306461826	8.95687e+07	5.63948e+07	2.52238e+08	1.30011e+06	1.30011e+06	3.11272e+08		3.02356e+08	1.30105e+08	1.41528e+08	2.46122e+08	1.02513e+08	1.41772e+08		0.430304	0.305924	0.468082	0.364597	1.08779	0.913652
Q9CPP6	NADH dehydrogenase [ubiquinone] 1 alpha subcomplex subunit 5 OS=Mus musculus GN=Ndufa5 PE=1 SV=3 - [NDUA5_MOUSE]	116	13.3512	8.104	1.30011e+06	1.30011e+06	1.30011e+06	1.30011e+06	8.66264e+06	9.06019e+07	1.30011e+06	1.30011e+06	7.75127e+06	7.34433e+06	1.30011e+06	7.50343e+06		1.30011e+06	2.54662e+07	5.97478e+06	0	3.7726e+07	2.70282e+06		19.5877	0.309694	4.5956	0.0241425	0.234616	0.40645
Q9QXZ6	Solute carrier organic anion transporter family member 1A1 OS=Mus musculus GN=Slco1a1 PE=1 SV=1 - [SO1A1_MOUSE]	670	74.347	8.22119	866739	866739	5.13281e+06	5.46565e+07	866739	866739	866739	866739	866739	866739	866739	866739		1.53807e+07	866739	866739	2.27427e+07	0	0		0.0563524	0.311344	0.0563524	0.311344	1	#DIV/0!
P34914	Bifunctional epoxide hydrolase 2 OS=Mus musculus GN=Ephx2 PE=1 SV=2 - [HYES_MOUSE]	554	62.4746	6.18896	1.2244e+09	1.27582e+09	1.64711e+09	1.62868e+09	1.36933e+09	2.05789e+09	2.11207e+09	1.30018e+09	1.64552e+09	9.43434e+08	1.46157e+09	1.88401e+09		1.444e+09	1.70987e+09	1.48363e+09	1.9485e+08	3.76395e+08	3.45982e+08		1.18412	0.318978	1.02745	0.868436	0.86769	0.472476
Q99LX0	Protein deglycase DJ-1 OS=Mus musculus GN=Park7 PE=1 SV=1 - [PARK7_MOUSE]	189	20.0084	6.771	866739	1.7526e+07	866739	4.07486e+07	866739	1.44248e+07	7.74336e+07	5.31825e+07	866739	4.95605e+07	5.68901e+07	3.2221e+08		1.5002e+07	3.64769e+07	1.07382e+08	1.63468e+07	3.04586e+07	1.25886e+08		2.43146	0.323273	7.15782	0.254304	2.94383	0.379632
Q9CY50	Translocon-associated protein subunit alpha OS=Mus musculus GN=Ssr1 PE=1 SV=1 - [SSRA_MOUSE]	286	32.0451	4.44971	5.10148e+07	3.67654e+07	1.7502e+07	88800850	1.62811e+08	7.84486e+07	866739	1.08768e+08	6.82301e+07	1.00748e+08	9.16102e+07	1.30365e+08		4.85208e+07	8.77235e+07	9.77383e+07	2.61202e+07	5.85472e+07	2.22588e+07		1.80796	0.330299	2.01436	0.0475441	1.11416	0.791122
P42932	T-complex protein 1 subunit theta OS=Mus musculus GN=Cct8 PE=1 SV=3 - [TCPQ_MOUSE]	548	59.5175	5.61768	4.72679e+07	4.54379e+07	7.13061e+07	7.42673e+07	1.11687e+08	1.01457e+08	1.79483e+08	2.16685e+06	1.03872e+08	7.28006e+07	7.98582e+07	1.9992e+08		5.95698e+07	9.86983e+07	1.14113e+08	1.32741e+07	6.32866e+07	5.08621e+07		1.65685	0.334975	1.91561	0.122426	1.15618	0.753457
Q9D3D9	ATP synthase subunit delta, mitochondrial OS=Mus musculus GN=Atp5d PE=1 SV=1 - [ATPD_MOUSE]	168	17.5891	5.08447	4.57579e+08	7.52835e+08	7.53465e+08	2.75607e+08	5.152e+08	7.34014e+08	1.10584e+09	6.1602e+08	2.01336e+08	6.25986e+08	9.82509e+08	1.1233e+09		5.59872e+08	7.42768e+08	7.33282e+08	2.03705e+08	2.23467e+08	3.56618e+08		1.32668	0.335158	1.30973	0.492137	0.987229	0.970125
P48678	Prelamin-A/C OS=Mus musculus GN=Lmna PE=1 SV=2 - [LMNA_MOUSE]	665	74.1927	6.97607	1.73348e+06	1.73348e+06	1.73348e+06	1.65332e+07	1.77218e+07	1.73348e+06	1.73348e+06	9.11393e+07	2.13151e+07	4.16213e+07	3.87504e+07	3.19785e+07		5.43341e+06	2.8082e+07	3.34163e+07	6.40846e+06	3.69866e+07	7.81474e+06		5.1684	0.336266	6.15016	0.00301375	1.18995	0.815061
Q9CWS0	N(G),N(G)-dimethylarginine dimethylaminohydrolase 1 OS=Mus musculus GN=Ddah1 PE=1 SV=3 - [DDAH1_MOUSE]	285	31.3609	5.97314	1.30011e+06	1.03713e+07	1.30011e+06	7.33102e+06	1.98584e+07	1.48969e+07	1.30011e+06	4.58572e+06	3.01152e+07	2.7059e+07	1.30011e+06	1.33472e+07		5.07562e+06	1.01603e+07	1.79554e+07	3.92554e+06	7.51776e+06	1.1504e+07		2.00178	0.339095	3.53757	0.116137	1.76721	0.363817
Q8VIJ6	Splicing factor, proline- and glutamine-rich OS=Mus musculus GN=Sfpq PE=1 SV=1 - [SFPQ_MOUSE]	699	75.3943	9.43701	3.69869e+07	1.51966e+07	1.30011e+06	1.97604e+07	1.98226e+07	2.74392e+07	2.51358e+07	3.35586e+07	2.06082e+07	8.67656e+07	1.30011e+06	3.07092e+07		1.8311e+07	2.6489e+07	3.48458e+07	1.27472e+07	4.92835e+06	3.17836e+07		1.44662	0.339949	1.90299	0.435016	1.31548	0.668497
Q60991	25-hydroxycholesterol 7-alpha-hydroxylase OS=Mus musculus GN=Cyp7b1 PE=2 SV=2 - [CP7B1_MOUSE]	507	58.4328	9.08545	3.4689e+06	1.73348e+06	1.73348e+06	8.92177e+07	1.73348e+06	1.73348e+06	1.73348e+06	1.73348e+06	1.73348e+06	1.73348e+06	1.73348e+06	1.73348e+06		2.40384e+07	1.73348e+06	1.73348e+06	3.7638e+07	0	0		0.072113	0.344272	0.072113	0.344272	1	#DIV/0!
Q8VC30	Triokinase/FMN cyclase OS=Mus musculus GN=Tkfc PE=1 SV=1 - [TKFC_MOUSE]	578	59.6534	6.91748	1.79189e+09	1.63686e+09	1.87279e+09	1.66551e+09	2.40294e+09	4.04787e+09	2.53787e+09	7.3826e+08	2.54858e+09	6.95263e+08	1.67889e+09	2.36318e+09		1.74177e+09	2.43173e+09	1.82148e+09	9.55245e+07	1.17173e+09	7.26431e+08		1.39613	0.348598	1.04577	0.856746	0.749045	0.472343
P26638	Serine--tRNA ligase, cytoplasmic OS=Mus musculus GN=Sars PE=1 SV=3 - [SYSC_MOUSE]	512	58.3517	6.30322	1.98819e+07	1.29812e+07	866739	866739	3.70349e+07	866739	866739	5.06872e+07	866739	6.87148e+07	866739	866739		8.64915e+06	2.23639e+07	1.78288e+07	8.15587e+06	2.20324e+07	2.93791e+07		2.58568	0.350984	2.06133	0.620723	0.797211	0.837706
P09671	Superoxide dismutase [Mn], mitochondrial OS=Mus musculus GN=Sod2 PE=1 SV=3 - [SODM_MOUSE]	222	24.5875	8.6167	398629790	2.46652e+08	5.48677e+08	2.4956e+08	4.51855e+08	5.55836e+08	3.7154e+08	3.97453e+08	3.21411e+08	4.05435e+08	4.27752e+08	4.17907e+08		3.6088e+08	4.44171e+08	3.93126e+08	1.24632e+08	7.06859e+07	4.21533e+07		1.2308	0.352868	1.08936	0.685991	0.885079	0.324
Q9CR16	Peptidyl-prolyl cis-trans isomerase D OS=Mus musculus GN=Ppid PE=1 SV=3 - [PPID_MOUSE]	370	40.7167	7.43018	866739	866739	2.56785e+07	2.42727e+07	866739	2.4534e+07	3.22119e+07	3.62742e+07	866739	866739	866739	1.8604e+07		1.29212e+07	2.34717e+07	5.30105e+06	1.20647e+07	1.3715e+07	7.68045e+06		1.81653	0.355727	0.410261	0.39169	0.225848	0.0921479
Q9QYR9	Acyl-coenzyme A thioesterase 2, mitochondrial OS=Mus musculus GN=Acot2 PE=1 SV=2 - [ACOT2_MOUSE]	453	49.6257	7.35693	1.30011e+06	7.66399e+06	1.30011e+06	1.30011e+06	1.30011e+06	1.30011e+06	1.30011e+06	1.30011e+06	1.30011e+06	1.65875e+08	1.30011e+06	1.92131e+08		2.89108e+06	1.30011e+06	9.01516e+07	2.75564e+06	0	8.93351e+07		0.449697	0.355918	31.1827	0.141785	69.3416	0.135722
Q61335	B-cell receptor-associated protein 31 OS=Mus musculus GN=Bcap31 PE=1 SV=4 - [BAP31_MOUSE]	245	27.939	8.70459	866739	866739	8.15389e+06	866739	866739	866739	866739	866739	866739	7.52354e+06	866739	8.67942e+06		2.68853e+06	866739	4.48411e+06	3.15543e+06	0	3.64038e+06		0.322384	0.355918	1.66787	0.542448	5.17354	0.136017
Q8VDM4	26S proteasome non-ATPase regulatory subunit 2 OS=Mus musculus GN=Psmd2 PE=1 SV=1 - [PSMD2_MOUSE]	908	100.139	5.17334	866739	866739	866739	1.85015e+07	866739	866739	866739	866739	2.60475e+07	4.30465e+07	866739	866739		5.27542e+06	866739	1.77069e+07	7.63606e+06	0	1.78805e+07		0.164298	0.355918	3.35649	0.310509	20.4293	0.153953
Q99JB2	Stomatin-like protein 2, mitochondrial OS=Mus musculus GN=Stoml2 PE=1 SV=1 - [STML2_MOUSE]	353	38.3612	8.86572	2.12154e+07	1.30011e+06	1.30011e+06	1.30011e+06	1.30011e+06	1.30011e+06	1.30011e+06	1.30011e+06	7.40983e+06	1.30011e+06	1.30011e+06	1.23341e+07		6.27892e+06	1.30011e+06	5.58605e+06	8.62355e+06	0	4.62605e+06		0.207059	0.355918	0.889651	0.906402	4.2966	0.15968
Q8C5H8	NAD kinase 2, mitochondrial OS=Mus musculus GN=Nadk2 PE=1 SV=2 - [NAKD2_MOUSE]	452	50.8269	8.07471	1.30011e+06	1.30011e+06	1.30011e+06	1.30011e+06	1.30011e+06	1.30011e+06	1.30011e+06	3.78988e+07	8.94891e+07	1.14173e+08	1.30011e+06	1.30011e+06		1.30011e+06	1.04498e+07	5.15656e+07	0	1.58477e+07	5.10175e+07		8.03763	0.355918	39.6625	0.138784	4.9346	0.230896
Q9R112	Sulfide:quinone oxidoreductase, mitochondrial OS=Mus musculus GN=Sqrdl PE=1 SV=3 - [SQRD_MOUSE]	450	50.2499	9.08545	866739	866739	1.22643e+07	866739	866739	866739	866739	866739	866739	53936278	1.3462e+07	866739		3.71613e+06	866739	1.72829e+07	4.93529e+06	0	2.17776e+07		0.233237	0.355918	4.65079	0.33317	19.9402	0.2395
Q9JJL3	Solute carrier organic anion transporter family member 1B2 OS=Mus musculus GN=Slco1b2 PE=1 SV=1 - [SO1B2_MOUSE]	689	76.6782	8.67529	866739	866739	866739	2.37546e+07	866739	866739	866739	866739	4.44719e+07	866739	866739	866739		6.58871e+06	866739	1.1768e+07	9.91074e+06	0	1.88816e+07		0.131549	0.355918	1.78609	0.688639	13.5774	0.355918
Q9EQH3	Vacuolar protein sorting-associated protein 35 OS=Mus musculus GN=Vps35 PE=1 SV=1 - [VPS35_MOUSE]	796	91.6548	5.43994	866739	1.53552e+07	866739	866739	866739	866739	866739	866739	866739	866739	866739	8.85604e+06		4.48886e+06	866739	2.86406e+06	6.27369e+06	0	3.45947e+06		0.193087	0.355918	0.638039	0.708034	3.30441	0.355918
Q9CR51	V-type proton ATPase subunit G 1 OS=Mus musculus GN=Atp6v1g1 PE=1 SV=3 - [VATG1_MOUSE]	118	13.716	7.97217	866739	866739	866739	866739	866739	866739	866739	1.39143e+07	866739	2.283e+07	866739	1.49108e+07		866739	4.12863e+06	9.86858e+06	0	5.64977e+06	9.42721e+06		4.76341	0.355918	11.3859	0.149233	2.39028	0.400547
Q9ER72	Cysteine--tRNA ligase, cytoplasmic OS=Mus musculus GN=Cars PE=1 SV=2 - [SYCC_MOUSE]	831	94.8	6.75635	1.30011e+06	1.30011e+06	1.30011e+06	1.30011e+06	1.5188e+07	1.30011e+06	1.30011e+06	1.30011e+06	9.31915e+07	1.30011e+06	1.30011e+06	1.30011e+06		1.30011e+06	4.77209e+06	2.4273e+07	0	6.01365e+06	3.97902e+07		3.67053	0.355918	18.6699	0.355918	5.08644	0.433444
Q8BWU8	Ethanolamine-phosphate phospho-lyase OS=Mus musculus GN=Etnppl PE=2 SV=1 - [AT2L1_MOUSE]	499	55.4611	6.93213	866739	866739	866739	866739	866739	866739	866739	2.44489e+07	866739	5.0727e+06	866739	866739		866739	6.76228e+06	1.91823e+06	0	1.02114e+07	1.82124e+06		7.80198	0.355918	2.21316	0.355918	0.283666	0.44946
P01878	Ig alpha chain C region OS=Mus musculus OX=10090 PE=1 SV=1 - [IGHA_MOUSE]	344	36.8523	5.05908	866739	866739	866739	866739	866739	866739	866739	6.84862e+07	866739	2.95341e+07	866739	866739		866739	1.77716e+07	8.03358e+06	0	2.92801e+07	1.24133e+07		20.504	0.355918	9.26874	0.355918	0.452046	0.614911
Q9R1P1	Proteasome subunit beta type-3 OS=Mus musculus GN=Psmb3 PE=1 SV=1 - [PSB3_MOUSE]	205	22.9494	6.55127	866739	866739	866739	866739	866739	6.75043e+07	866739	866739	866739	866739	866739	2.91221e+07		866739	1.75261e+07	7.93057e+06	0	2.88549e+07	1.22349e+07		20.2208	0.355918	9.14989	0.355918	0.4525	0.614957
Q9CYR6	Phosphoacetylglucosamine mutase OS=Mus musculus GN=Pgm3 PE=1 SV=1 - [AGM1_MOUSE]	542	59.4153	6.20166	866739	866739	866739	866739	866739	5.63396e+07	866739	866739	9.12849e+07	866739	866739	5.34604e+06		866739	1.47349e+07	2.45911e+07	0	2.40204e+07	3.85491e+07		17.0004	0.355918	28.372	0.327445	1.6689	0.719957
Q9CQM9	Glutaredoxin-3 OS=Mus musculus GN=Glrx3 PE=1 SV=1 - [GLRX3_MOUSE]	337	37.7544	5.59229	866739	866739	866739	866739	866739	4.79769e+07	866739	866739	866739	866739	1.75723e+07	1.99174e+07		866739	1.26443e+07	9.80581e+06	0	2.03993e+07	8.97743e+06		14.5883	0.355918	11.3134	0.135352	0.775512	0.832725
Q8K3J1	NADH dehydrogenase [ubiquinone] iron-sulfur protein 8, mitochondrial OS=Mus musculus GN=Ndufs8 PE=1 SV=1 - [NDUS8_MOUSE]	212	24.0228	6.21436	866739	866739	866739	866739	866739	5.11692e+07	866739	866739	866739	866739	866739	5.13965e+07		866739	1.34423e+07	1.34992e+07	0	2.17816e+07	2.188e+07		15.5091	0.355918	15.5747	0.355918	1.00423	0.997559
Q61765	Keratin, type I cuticular Ha1 OS=Mus musculus GN=Krt31 PE=1 SV=2 - [K1H1_MOUSE]	416	47.0867	4.89404	1.73348e+06	1.73348e+06	1.73348e+06	9.96523e+07	1.73348e+06	1.73348e+06	1.73348e+06	1.73348e+06	1.73348e+06	1.73348e+06	1.73348e+06	1.73348e+06		2.62132e+07	1.73348e+06	1.73348e+06	4.24001e+07	0	0		0.06613	0.355918	0.06613	0.355918	1	#DIV/0!
P54869	Hydroxymethylglutaryl-CoA synthase, mitochondrial OS=Mus musculus GN=Hmgcs2 PE=1 SV=2 - [HMCS2_MOUSE]	508	56.7865	8.41162	3.58787e+09	4.57873e+09	4.29895e+09	5.97519e+09	2.99333e+09	5.39932e+09	4.38245e+09	2.19578e+09	3.28161e+09	4.11293e+09	3.26693e+09	3.44891e+09		4.61019e+09	3.74272e+09	3.5276e+09	8.66924e+08	1.23574e+09	3.45424e+08		0.811837	0.357995	0.765174	0.0912417	0.942522	0.781289
P01027	Complement C3 OS=Mus musculus GN=C3 PE=1 SV=3 - [CO3_MOUSE]	1663	186.366	6.72705	2.03945e+07	2.00836e+07	5.42379e+07	3.46696e+06	3.61217e+07	1.70682e+07	5.83966e+07	4.07305e+07	1.95778e+07	2.77372e+08	3.58518e+07	3.46696e+06		2.45457e+07	3.80793e+07	8.40671e+07	1.846e+07	1.47065e+07	1.1219e+08		1.55136	0.358974	3.42492	0.399499	2.20768	0.507844
P56399	Ubiquitin carboxyl-terminal hydrolase 5 OS=Mus musculus GN=Usp5 PE=1 SV=1 - [UBP5_MOUSE]	858	95.7724	5.0083	866739	866739	2.39228e+07	866739	3.62888e+07	3.27695e+07	866739	866739	2.88114e+07	4.78591e+07	3.74976e+07	3.48005e+07		6.63075e+06	1.76979e+07	3.72421e+07	9.98356e+06	1.68771e+07	6.88881e+06		2.66907	0.366044	5.61658	0.00471309	2.10432	0.112687
Q7M6Y3	Phosphatidylinositol-binding clathrin assembly protein OS=Mus musculus GN=Picalm PE=1 SV=1 - [PICAL_MOUSE]	660	71.4983	7.91357	866739	866739	5.99986e+07	3.60344e+07	866739	866739	3.17722e+07	866739	2.24253e+07	866739	3.72847e+07	866739		2.44416e+07	8.59311e+06	1.53609e+07	2.50511e+07	1.33825e+07	1.54169e+07		0.351577	0.371115	0.628472	0.612079	1.78758	0.586703
P01942	Hemoglobin subunit alpha OS=Mus musculus GN=Hba PE=1 SV=2 - [HBA_MOUSE]	142	15.0758	8.22119	1.40371e+09	1.04119e+09	2.27679e+09	1.34974e+09	1.07254e+09	2.24964e+09	3.1922e+09	1.58824e+09	1.80758e+09	4.71684e+09	1.84983e+09	3.30765e+09		1.51786e+09	2.02565e+09	2.92048e+09	4.59482e+08	7.92267e+08	1.20017e+09		1.33455	0.373977	1.92408	0.10759	1.44175	0.322562
Q9Z2I9	Succinyl-CoA ligase [ADP-forming] subunit beta, mitochondrial OS=Mus musculus GN=Sucla2 PE=1 SV=2 - [SUCB1_MOUSE]	463	50.0821	7.00537	1.83709e+08	4.92087e+08	3.35689e+08	5.10685e+08	3.13178e+08	6.74303e+08	3.73118e+08	6.07081e+08	4.15321e+08	7.19971e+08	2.32937e+08	5.80156e+08		3.80542e+08	4.9192e+08	4.87096e+08	1.32414e+08	1.52142e+08	1.82098e+08		1.29268	0.375776	1.28001	0.443723	0.990194	0.973055
P45878	Peptidyl-prolyl cis-trans isomerase FKBP2 OS=Mus musculus GN=Fkbp2 PE=1 SV=1 - [FKBP2_MOUSE]	140	15.3342	8.88037	866739	9.51316e+07	866739	4.6441e+07	866739	866739	4.61823e+07	866739	866739	4.25138e+07	866739	1.63456e+08		3.58265e+07	1.21956e+07	5.19259e+07	3.89684e+07	1.96222e+07	6.6599e+07		0.340408	0.384395	1.44937	0.730198	4.25774	0.359886
P97328	Ketohexokinase OS=Mus musculus GN=Khk PE=1 SV=1 - [KHK_MOUSE]	298	32.7295	6.16357	3.93446e+08	6.21469e+08	8.59517e+08	5.17788e+08	3.47735e+08	6.495e+08	5.58364e+08	3.8413e+08	4.5459e+08	3.30819e+08	6.24899e+08	6.64679e+08		5.98055e+08	4.84932e+08	5.18747e+08	1.71186e+08	1.23955e+08	1.34162e+08		0.810849	0.389667	0.86739	0.550948	1.06973	0.759355
Q8R4N0	Citrate lyase subunit beta-like protein, mitochondrial OS=Mus musculus GN=Clybl PE=1 SV=2 - [CLYBL_MOUSE]	338	37.5248	8.54346	2.82231e+07	1.28704e+07	3.56724e+07	1.73348e+06	2.65282e+07	1.73348e+06	4.04416e+07	6.55065e+07	5.40763e+07	2.22486e+08	8.6688e+07	3.9008e+07		1.96248e+07	3.35524e+07	1.00565e+08	1.32021e+07	2.30776e+07	7.24704e+07		1.70969	0.399204	5.12435	0.105707	2.99724	0.177837
Q64459	Cytochrome P450 3A11 OS=Mus musculus GN=Cyp3a11 PE=1 SV=1 - [CP3AB_MOUSE]	504	57.817	8.82178	5.15995e+08	8.42292e+08	8.77231e+08	8.95391e+08	7.52941e+08	6.0594e+08	9.83488e+08	1.83048e+09	2.035e+09	1.82641e+09	7.19704e+08	1.38696e+09		7.82727e+08	1.04321e+09	1.49202e+09	1.55175e+08	4.7403e+08	5.03525e+08		1.33279	0.400565	1.90618	0.0585092	1.43022	0.303932
Q2TPA8	Hydroxysteroid dehydrogenase-like protein 2 OS=Mus musculus GN=Hsdl2 PE=1 SV=1 - [HSDL2_MOUSE]	490	54.1739	6.7417	9.95051e+06	1.44823e+07	1.66766e+07	2.14121e+07	1.35579e+07	6.30412e+07	1.43812e+07	1.60328e+07	7.2737e+07	8.08414e+07	2.12319e+07	1.07393e+08		1.56304e+07	2.67533e+07	7.05509e+07	4.12621e+06	2.09698e+07	3.12266e+07		1.71162	0.402089	4.5137	0.0233961	2.63709	0.0903023
O55029	Coatomer subunit beta' OS=Mus musculus GN=Copb2 PE=1 SV=2 - [COPB2_MOUSE]	905	102.384	5.30029	866739	2.96041e+07	866739	1.97195e+07	4.58813e+07	1.64832e+07	866739	3.10959e+07	1.3302e+07	6.27005e+07	2.86937e+07	7.0924e+07		1.27643e+07	2.35818e+07	4.3905e+07	1.24002e+07	1.67339e+07	2.37235e+07		1.84749	0.402991	3.43969	0.0905335	1.86182	0.27089
Q91YP3	Deoxyribose-phosphate aldolase OS=Mus musculus GN=Dera PE=1 SV=1 - [DEOC_MOUSE]	318	34.9533	8.71924	1.94352e+07	1.42781e+07	3.33573e+07	866739	866739	1.64153e+07	866739	1.97399e+07	866739	866739	2.57306e+07	866739		1.69843e+07	9.47217e+06	7.08271e+06	1.16317e+07	8.68534e+06	1.07664e+07		0.557701	0.404608	0.417014	0.320788	0.747739	0.774888
Q8K0E8	Fibrinogen beta chain OS=Mus musculus GN=Fgb PE=1 SV=1 - [FIBB_MOUSE]	481	54.7177	7.07861	2.60022e+06	2.60022e+06	9.23584e+07	3.18198e+07	3.07234e+07	8.07508e+07	1.5826e+08	2.60022e+06	2.60022e+06	1.03685e+09	2.60022e+06	2.60022e+06		3.23447e+07	6.80837e+07	2.61163e+08	3.66449e+07	5.91105e+07	4.47844e+08		2.10495	0.407701	8.07439	0.411707	3.83591	0.487054
Q9DBL7	Bifunctional coenzyme A synthase OS=Mus musculus GN=Coasy PE=1 SV=2 - [COASY_MOUSE]	563	61.9846	7.10791	5.75548e+07	2.59323e+07	6.62368e+07	4.54968e+07	1.06445e+08	9.21807e+07	8.26041e+07	2.16685e+06	1.8745e+08	6.36025e+07	8.9325e+07	2.5261e+08		4.88052e+07	7.08492e+07	1.48247e+08	1.51206e+07	4.0551e+07	7.5936e+07		1.45167	0.411601	3.03753	0.0677739	2.09243	0.170416
P62717	60S ribosomal protein L18a OS=Mus musculus GN=Rpl18a PE=1 SV=1 - [RL18A_MOUSE]	176	20.7189	10.7114	1.08625e+08	866739	866739	866739	866739	1.68745e+08	1.12791e+08	866739	1.07631e+08	2.58908e+08	866739	1.48868e+08		2.78063e+07	7.08172e+07	1.29068e+08	4.66607e+07	7.2694e+07	9.23925e+07		2.5468	0.421581	4.64169	0.141108	1.82256	0.423723
P11725	Ornithine carbamoyltransferase, mitochondrial OS=Mus musculus GN=Otc PE=1 SV=1 - [OTC_MOUSE]	354	39.7396	8.73389	1.11674e+09	1.50206e+09	1.33842e+09	2.56503e+09	1.83089e+09	2.89157e+09	1.64373e+09	1.65009e+09	1.1137e+09	3.40685e+09	4.84377e+08	8.37204e+08		1.63056e+09	2.00407e+09	1.46053e+09	5.56574e+08	5.17879e+08	1.14563e+09		1.22907	0.427442	0.895722	0.824824	0.728782	0.482283
Q9JHW2	Omega-amidase NIT2 OS=Mus musculus GN=Nit2 PE=1 SV=1 - [NIT2_MOUSE]	276	30.4826	6.90283	1.73348e+06	4.2786e+07	7.50964e+07	6.69101e+07	7.1424e+07	1.73348e+06	1.76981e+08	7.13413e+07	6.18977e+07	1.747e+08	1.5984e+08	2.77826e+08		4.66315e+07	8.03701e+07	1.68566e+08	2.85136e+07	6.2608e+07	7.65336e+07		1.72351	0.428226	3.61485	0.04144	2.09737	0.173321
Q9CQ54	NADH dehydrogenase [ubiquinone] 1 subunit C2 OS=Mus musculus GN=Ndufc2 PE=1 SV=1 - [NDUC2_MOUSE]	120	14.1542	9.20264	115451766	866739	866739	866739	1.27917e+08	866739	866739	1.60092e+08	866739	1.58877e+08	866739	866739		2.9513e+07	7.24356e+07	4.03694e+07	4.96168e+07	7.24673e+07	6.84206e+07		2.45436	0.429738	1.36785	0.831317	0.557314	0.597498
Q921X9	Protein disulfide-isomerase A5 OS=Mus musculus GN=Pdia5 PE=1 SV=1 - [PDIA5_MOUSE]	517	59.229	7.50342	866739	1.13002e+07	1.56471e+07	2.76141e+07	866739	866739	1.65755e+07	1.39125e+07	866739	1.40535e+07	1.42742e+07	1.2413e+07		1.3857e+07	8.05538e+06	1.04019e+07	9.58837e+06	7.25003e+06	5.55187e+06		0.58132	0.435204	0.750657	0.608555	1.2913	0.671872
Q99J08	SEC14-like protein 2 OS=Mus musculus GN=Sec14l2 PE=1 SV=1 - [S14L2_MOUSE]	403	46.2706	7.10791	1.53541e+08	8.1941e+07	8.27446e+07	1.03475e+08	2.13679e+08	1.99242e+08	8.76418e+07	6.16728e+07	1.83316e+08	5.80302e+07	7.76569e+07	8.8938e+07		1.05425e+08	1.40559e+08	1.01985e+08	2.90896e+07	6.67336e+07	4.82412e+07		1.33325	0.435222	0.967369	0.919211	0.72557	0.448137
Q8QZR3	Pyrethroid hydrolase Ces2a OS=Mus musculus GN=Ces2a PE=1 SV=1 - [EST2A_MOUSE]	558	61.9002	6.16357	1.17446e+08	1.15699e+08	2.48141e+08	1.10645e+08	1.42618e+08	1.28508e+08	1.82712e+08	3.18617e+08	1.06941e+08	1.64455e+08	2.60022e+06	7.82989e+07		1.47983e+08	1.93114e+08	8.80737e+07	5.78802e+07	7.51381e+07	5.82909e+07		1.30498	0.441369	0.595162	0.253389	0.456072	0.104254
P46978	Dolichyl-diphosphooligosaccharide--protein glycosyltransferase subunit STT3A OS=Mus musculus GN=Stt3a PE=1 SV=1 - [STT3A_MOUSE]	705	80.5449	8.104	866739	3.72778e+07	5.169e+07	4.62847e+07	1.0949e+08	866739	8.56325e+07	3.0424e+07	866739	866739	3.27115e+07	2.63794e+07		3.40298e+07	5.66033e+07	1.52061e+07	1.98268e+07	4.31034e+07	1.45131e+07		1.66334	0.441412	0.446847	0.232797	0.268643	0.165978
P17665	Cytochrome c oxidase subunit 7C, mitochondrial OS=Mus musculus GN=Cox7c PE=1 SV=1 - [COX7C_MOUSE]	63	7.32788	11.0044	8.17728e+07	866739	1.42416e+08	1.49996e+08	1.66037e+08	866739	2.12788e+08	1.89027e+08	1.56303e+08	1.31744e+07	1.37092e+08	1.72845e+08		9.37629e+07	1.42179e+08	1.19854e+08	5.9797e+07	8.32446e+07	6.28774e+07		1.51637	0.444524	1.27826	0.621157	0.842975	0.723618
Q8BW75	Amine oxidase [flavin-containing] B OS=Mus musculus GN=Maob PE=1 SV=4 - [AOFB_MOUSE]	520	58.5204	8.29443	2.3832e+08	3.05561e+08	4.07274e+08	2.39076e+08	2.28064e+08	2.22939e+08	2.70938e+08	3.20919e+08	2.03286e+08	5.65863e+08	2.01915e+08	3.43361e+08		2.97558e+08	2.60715e+08	3.28606e+08	6.89763e+07	3.94401e+07	1.48547e+08		0.876183	0.452532	1.10434	0.753802	1.2604	0.473221
O70503	Very-long-chain 3-oxoacyl-CoA reductase OS=Mus musculus GN=Hsd17b12 PE=1 SV=1 - [DHB12_MOUSE]	312	34.7194	9.5249	6.82422e+07	2.06067e+07	4.3581e+07	4.5043e+07	1.30011e+06	1.85246e+07	8.60277e+07	1.30011e+06	99375449	1.30011e+06	1.30011e+06	2.68983e+07		4.43682e+07	2.67881e+07	3.22185e+07	1.68497e+07	3.49174e+07	4.01567e+07		0.603769	0.462105	0.726162	0.646061	1.20272	0.86552
P24472	Glutathione S-transferase A4 OS=Mus musculus GN=Gsta4 PE=1 SV=3 - [GSTA4_MOUSE]	222	25.5474	7.38623	1.30011e+06	1.85422e+09	7.85039e+07	1.27461e+07	1.00166e+07	2.41834e+08	1.28213e+08	1.5485e+08	1.34341e+07	3.73844e+08	2.44118e+09	1.96743e+08		4.86693e+08	1.33729e+08	7.56301e+08	7.90092e+08	8.28674e+07	9.81078e+08		0.27477	0.470767	1.55396	0.723587	5.65549	0.315423
P24527	Leukotriene A-4 hydrolase OS=Mus musculus GN=Lta4h PE=1 SV=4 - [LKHA4_MOUSE]	611	69.0071	6.41748	866739	866739	3.89449e+07	866739	866739	5.21655e+07	866739	3.62081e+07	866739	866739	866739	2.16276e+07		1.03863e+07	2.25268e+07	6.05696e+06	1.64883e+07	2.23827e+07	8.98973e+06		2.1689	0.478049	0.58317	0.703504	0.268878	0.281679
A2ADY9	Protein DDI1 homolog 2 OS=Mus musculus GN=Ddi2 PE=1 SV=1 - [DDI2_MOUSE]	399	44.5625	5.04639	7.867e+06	2.09903e+07	1.26905e+07	1.59629e+07	866739	866739	2.34982e+07	1.38345e+07	866739	866739	1.85952e+07	2.10383e+07		1.43777e+07	9.76655e+06	1.03418e+07	4.78212e+06	9.53311e+06	9.5143e+06		0.679286	0.482263	0.719293	0.535873	1.0589	0.943438
P50580	Proliferation-associated protein 2G4 OS=Mus musculus GN=Pa2g4 PE=1 SV=3 - [PA2G4_MOUSE]	394	43.6712	6.85889	1.73348e+06	5.23897e+07	5.44261e+07	1.26823e+07	2.49145e+07	1.22868e+08	1.73348e+06	5.87234e+07	1.73348e+06	1.03569e+08	1.73348e+06	2.27923e+07		3.03079e+07	5.20597e+07	3.2457e+07	2.34332e+07	4.56282e+07	4.19468e+07		1.71769	0.490342	1.07091	0.940768	0.623457	0.60359
Q8VCR2	17-beta-hydroxysteroid dehydrogenase 13 OS=Mus musculus GN=Hsd17b13 PE=1 SV=2 - [DHB13_MOUSE]	304	33.4368	8.88037	1.30011e+06	4.16739e+07	1.11594e+08	1.33196e+08	5.356e+07	1.30011e+06	6.36493e+07	6.88046e+07	4.21728e+07	1.30706e+08	1.47018e+08	6.62199e+07		7.19409e+07	4.68285e+07	9.65292e+07	5.29876e+07	2.68516e+07	4.35617e+07		0.65093	0.491633	1.34178	0.557524	2.06133	0.143515
P33267	Cytochrome P450 2F2 OS=Mus musculus GN=Cyp2f2 PE=1 SV=1 - [CP2F2_MOUSE]	491	55.913	7.89893	4.98226e+08	3.91079e+08	6.4491e+08	6.64576e+08	4.61956e+08	8.15309e+08	4.15989e+08	9.16568e+08	8.41789e+08	4.54967e+08	2.84602e+08	5.57977e+08		5.49698e+08	6.52455e+08	5.34834e+08	1.11883e+08	2.17073e+08	2.02331e+08		1.18693	0.493575	0.97296	0.91497	0.819725	0.518016
E9Q5K4	Cytochrome P450 2C44 OS=Mus musculus OX=10090 GN=Cyp2c23 PE=1 SV=1 - [CP2CN_MOUSE]	494	56.3858	8.47021	1.60997e+07	1.16457e+07	2.86223e+07	2.55123e+07	1.30011e+06	1.30011e+06	2.68374e+07	2.78427e+07	1.98724e+07	1.30011e+06	1.30011e+06	1.30011e+06		2.047e+07	1.43201e+07	5.94317e+06	6.87119e+06	1.30248e+07	8.04202e+06		0.699565	0.496692	0.290336	0.0548649	0.415024	0.379801
P97461	40S ribosomal protein S5 OS=Mus musculus GN=Rps5 PE=1 SV=3 - [RS5_MOUSE]	204	22.875	9.71533	2.88731e+07	1.90757e+08	5.54937e+07	1.7628e+08	1.68526e+08	1.30011e+06	2.51856e+08	2.32992e+08	1.00602e+08	1.81791e+08	2.24487e+08	2.21319e+08		1.12851e+08	1.63668e+08	1.8205e+08	7.1475e+07	9.87039e+07	4.9942e+07		1.4503	0.497308	1.61319	0.21839	1.11231	0.783172
Q8CAY6	Acetyl-CoA acetyltransferase, cytosolic OS=Mus musculus GN=Acat2 PE=1 SV=2 - [THIC_MOUSE]	397	41.2712	7.50342	7.21872e+08	5.36793e+08	5.13921e+08	3.9056e+08	1.3624e+09	7.9017e+08	6.42457e+08	1.24173e+08	6.96737e+08	4.13995e+08	5.61553e+08	1.03189e+09		5.40787e+08	7.29799e+08	6.76044e+08	1.18425e+08	4.41088e+08	2.28492e+08		1.34951	0.500422	1.25011	0.397757	0.926343	0.857502
P48758	Carbonyl reductase [NADPH] 1 OS=Mus musculus GN=Cbr1 PE=1 SV=3 - [CBR1_MOUSE]	277	30.622	8.30908	1.39772e+08	3.44401e+07	1.61364e+08	7.48225e+07	2.16685e+06	1.25079e+09	4.428e+07	2.16685e+06	1.68657e+08	2.8109e+08	2.4455e+08	3.34862e+08		1.026e+08	3.24851e+08	2.5729e+08	5.06269e+07	5.34868e+08	6.04193e+07		3.1662	0.500602	2.50771	0.0145136	0.792024	0.835101
Q91YH5	Atlastin-3 OS=Mus musculus GN=Atl3 PE=1 SV=1 - [ATLA3_MOUSE]	541	60.5366	6.1001	2.12596e+07	866739	866739	866739	2.19569e+07	2.33945e+07	866739	866739	6.01122e+07	866739	2.69766e+07	866739		5.96495e+06	1.17712e+07	2.22056e+07	8.83035e+06	1.09163e+07	2.43432e+07		1.9734	0.500746	3.72268	0.319057	1.88643	0.523385
P54071	Isocitrate dehydrogenase [NADP], mitochondrial OS=Mus musculus GN=Idh2 PE=1 SV=3 - [IDHP_MOUSE]	452	50.8739	8.68994	6.96518e+08	4.11218e+08	3.4923e+08	4.02434e+08	4.19883e+08	5.17546e+08	3.48122e+08	1.12369e+09	4.57193e+08	1.95407e+09	4.98689e+08	3.13484e+08		4.6485e+08	6.0231e+08	8.05859e+08	1.3584e+08	3.06965e+08	6.66472e+08		1.29571	0.504771	1.73359	0.418565	1.33795	0.647905
Q9CXN7	Phenazine biosynthesis-like domain-containing protein 2 OS=Mus musculus GN=Pbld2 PE=1 SV=1 - [PBLD2_MOUSE]	288	31.9633	5.33838	6.50963e+07	2.16819e+08	2.28538e+08	1.81821e+08	6.09982e+07	1.97756e+08	1.21584e+08	1.75335e+08	1.4825e+08	6.08509e+07	1.66113e+08	3.14502e+08		1.73069e+08	1.38918e+08	1.72429e+08	6.46638e+07	5.28207e+07	9.11852e+07		0.802678	0.50526	0.996303	0.992411	1.24122	0.601669
P08226	Apolipoprotein E OS=Mus musculus GN=Apoe PE=1 SV=2 - [APOE_MOUSE]	311	35.8444	5.68115	2.07322e+08	2.22723e+08	2.2168e+08	2.46099e+08	2.14737e+08	1.47518e+08	2.7531e+08	1.79476e+08	2.28258e+08	2.41453e+08	2.35511e+08	2.79116e+08		2.24456e+08	2.0426e+08	2.46084e+08	1.38987e+07	4.74125e+07	1.96349e+07		0.910022	0.505506	1.09636	0.170421	1.20476	0.207751
P54728	UV excision repair protein RAD23 homolog B OS=Mus musculus GN=Rad23b PE=1 SV=2 - [RD23B_MOUSE]	416	43.4858	4.83057	2.16685e+06	2.16685e+06	8.68354e+07	2.16685e+06	2.16685e+06	2.16685e+06	2.16685e+06	2.48549e+07	3.44503e+07	2.16685e+06	1.1951e+08	1.04521e+08		2.3334e+07	7.83886e+06	6.51619e+07	3.66626e+07	9.82421e+06	4.85138e+07		0.335942	0.506031	2.79257	0.278482	8.31267	0.091681
P14869	60S acidic ribosomal protein P0 OS=Mus musculus GN=Rplp0 PE=1 SV=3 - [RLA0_MOUSE]	317	34.1948	6.25244	1.9322e+08	1.496e+08	2.36346e+08	2.53719e+08	2.5084e+08	2.67236e+08	1.81295e+08	2.18225e+08	2.70544e+08	4.65715e+08	3.15238e+08	3.35418e+08		2.08221e+08	2.29399e+08	3.46729e+08	4.0381e+07	3.29019e+07	7.25973e+07		1.10171	0.507696	1.6652	0.0277705	1.51147	0.0435104
Q8R0F9	SEC14-like protein 4 OS=Mus musculus GN=Sec14l4 PE=1 SV=1 - [S14L4_MOUSE]	403	46.0235	7.12256	1.05841e+08	4.34056e+07	866739	866739	866739	6.51168e+07	866739	866739	6.61627e+07	6.76856e+07	866739	866739		3.77451e+07	1.69293e+07	3.38955e+07	4.29801e+07	2.78211e+07	3.30331e+07		0.448516	0.507705	0.89801	0.906121	2.00218	0.521609
P12710	Fatty acid-binding protein, liver OS=Mus musculus GN=Fabp1 PE=1 SV=2 - [FABPL_MOUSE]	127	14.2365	8.55811	1.27194e+10	8.27394e+09	8.43305e+09	8.37361e+09	8.04296e+09	1.50065e+10	1.87079e+10	5.22422e+09	1.5905e+10	4.7329e+09	5.01959e+09	7.44152e+09		9.44999e+09	1.17454e+10	8.27474e+09	1.88842e+09	5.36994e+09	4.52922e+09		1.2429	0.511049	0.875635	0.692696	0.704509	0.425004
Q8K5B2	Multiple coagulation factor deficiency protein 2 homolog OS=Mus musculus GN=Mcfd2 PE=1 SV=1 - [MCFD2_MOUSE]	145	16.1578	4.71631	866739	1.54641e+07	2.89635e+07	2.97061e+07	866739	1.32001e+07	1.84947e+07	2.01117e+07	1.05815e+07	866739	866739	1.82558e+07		1.87501e+07	1.31683e+07	7.6427e+06	1.17788e+07	7.54835e+06	7.29901e+06		0.702306	0.515356	0.407608	0.214375	0.580386	0.397185
Q61133	Glutathione S-transferase theta-2 OS=Mus musculus GN=Gstt2 PE=1 SV=4 - [GSTT2_MOUSE]	244	27.6166	7.54736	6.55516e+07	7.36832e+07	7.28629e+07	3.85804e+07	1.76241e+07	1.73348e+06	1.27008e+08	2.23985e+07	1.73348e+06	1.43366e+08	2.78887e+07	1.05797e+08		6.26695e+07	4.21909e+07	6.96962e+07	1.42636e+07	4.95629e+07	5.72217e+07		0.673229	0.517305	1.11212	0.843322	1.65192	0.552334
Q8CG76	Aflatoxin B1 aldehyde reductase member 2 OS=Mus musculus GN=Akr7a2 PE=1 SV=3 - [ARK72_MOUSE]	367	40.5862	8.11865	4.56683e+07	3.44318e+07	1.02263e+08	9.712e+07	5.78284e+07	5.95196e+07	6.60346e+07	2.07687e+08	6.70603e+07	4.67987e+07	6.30861e+07	1.30011e+06		6.98708e+07	9.77673e+07	4.45613e+07	3.01391e+07	6.35358e+07	2.61051e+07		1.39926	0.517682	0.637767	0.313726	0.45579	0.228265
Q9JMA1	Ubiquitin carboxyl-terminal hydrolase 14 OS=Mus musculus GN=Usp14 PE=1 SV=3 - [UBP14_MOUSE]	493	55.966	5.23682	866739	1.016e+07	1.26612e+07	6.74814e+06	866739	866739	1.55676e+07	866739	1.07183e+07	5.24467e+06	5.13768e+06	1.12656e+07		7.60902e+06	4.54196e+06	8.09154e+06	4.42242e+06	6.36567e+06	2.90706e+06		0.596918	0.518704	1.06342	0.879701	1.78151	0.413446
P28665	Murinoglobulin-1 OS=Mus musculus GN=Mug1 PE=1 SV=3 - [MUG1_MOUSE]	1476	165.193	6.41748	2.62058e+07	1.19902e+07	5.52674e+07	1.85937e+08	1.73348e+06	9.1801e+07	2.96949e+07	3.67248e+07	1.73348e+06	1.73348e+06	1.73348e+06	1.73348e+06		6.98501e+07	3.99885e+07	1.73348e+06	6.8814e+07	3.26519e+07	0		0.57249	0.522422	0.0248171	0.137264	0.0433494	0.0887528
Q8BP47	Asparagine--tRNA ligase, cytoplasmic OS=Mus musculus GN=Nars PE=1 SV=2 - [SYNC_MOUSE]	559	64.238	5.85889	1.68966e+07	1.95291e+07	2.03418e+07	1.88644e+07	2.33188e+07	3.00434e+07	866739	866739	866739	3.0469e+07	866739	2.90836e+07		1.8908e+07	1.37739e+07	1.53215e+07	1.27371e+06	1.31243e+07	1.44631e+07		0.728472	0.525185	0.810321	0.683695	1.11236	0.895323
P10922	Histone H1.0 OS=Mus musculus GN=H1f0 PE=2 SV=4 - [H10_MOUSE]	194	20.8482	10.9019	1.08298e+08	1.86966e+08	2.05862e+08	2.54055e+08	1.90593e+08	6.48912e+07	2.69287e+08	7.98939e+07	1.19934e+08	2.26219e+08	286355784	3.08958e+08		1.88795e+08	1.51166e+08	2.35367e+08	5.25197e+07	8.37111e+07	7.31847e+07		0.800689	0.534043	1.24668	0.405023	1.557	0.237604
P70349	Histidine triad nucleotide-binding protein 1 OS=Mus musculus GN=Hint1 PE=1 SV=3 - [HINT1_MOUSE]	126	13.7681	6.87354	2.12682e+08	3.44356e+08	1.68265e+08	3.34579e+08	1.95222e+08	4.32284e+08	1.81259e+08	4.86263e+08	1.88865e+08	2.31771e+08	1.92336e+08	5.02439e+08		2.64971e+08	3.23757e+08	2.78853e+08	7.62128e+07	1.36943e+08	1.30183e+08		1.22186	0.539951	1.05239	0.87859	0.861302	0.69491
Q9Z0N1	Eukaryotic translation initiation factor 2 subunit 3, X-linked OS=Mus musculus GN=Eif2s3x PE=1 SV=2 - [IF2G_MOUSE]	472	51.0332	8.39697	866739	866739	1.36128e+07	1.32401e+07	3.54464e+07	1.68315e+06	866739	1.34213e+07	866739	1.24303e+07	866739	4.96958e+07		7.1466e+06	1.28544e+07	1.59649e+07	6.28124e+06	1.39573e+07	2.00385e+07		1.79867	0.542229	2.23391	0.494418	1.24198	0.832706
Q64516	Glycerol kinase OS=Mus musculus GN=Gk PE=1 SV=2 - [GLPK_MOUSE]	559	61.188	5.87158	1.30011e+06	1.90389e+07	1.18292e+07	1.30011e+06	1.30011e+06	8.35038e+07	1.30011e+06	1.30011e+06	1.30011e+06	1.67576e+07	2.08001e+07	2.18354e+07		8.36706e+06	2.1851e+07	1.51733e+07	7.51261e+06	3.55953e+07	8.23133e+06		2.61156	0.544616	1.81345	0.33085	0.694396	0.762285
A2AJL3	FGGY carbohydrate kinase domain-containing protein OS=Mus musculus GN=Fggy PE=1 SV=1 - [FGGY_MOUSE]	552	60.2975	6.41748	1.41321e+07	2.24595e+07	2.62011e+07	3.57842e+07	1.95703e+07	2.10039e+07	6.49137e+07	2.27071e+07	1.30011e+06	2.31917e+07	2.30924e+07	2.23843e+07		2.46443e+07	3.20487e+07	1.74921e+07	7.77495e+06	1.90071e+07	9.35365e+06		1.30046	0.555276	0.709786	0.347748	0.545798	0.278926
P70699	Lysosomal alpha-glucosidase OS=Mus musculus GN=Gaa PE=1 SV=2 - [LYAG_MOUSE]	953	106.18	5.8335	866739	866739	866739	1.53768e+07	866739	866739	5.93212e+06	866739	866739	866739	866739	1.92095e+07		4.49425e+06	2.13309e+06	5.45244e+06	6.28304e+06	2.19338e+06	7.94267e+06		0.474625	0.561426	1.2132	0.875209	2.55613	0.511463
O09131	Glutathione S-transferase omega-1 OS=Mus musculus GN=Gsto1 PE=1 SV=2 - [GSTO1_MOUSE]	240	27.4799	7.35693	5.41019e+07	9.0719e+07	8.49082e+07	5.12275e+07	3.02915e+08	1.30011e+06	4.57011e+07	9.51746e+07	1.30011e+06	8.48173e+08	2.38402e+07	3.48986e+07		7.02391e+07	1.11273e+08	2.27053e+08	1.77233e+07	1.1552e+08	3.58808e+08		1.5842	0.5654	3.23257	0.478239	2.04051	0.613836
Q9Z2Z6	Mitochondrial carnitine/acylcarnitine carrier protein OS=Mus musculus GN=Slc25a20 PE=1 SV=1 - [MCAT_MOUSE]	301	33.0049	9.11475	8.22368e+07	3.03359e+06	2.40907e+08	2.3309e+08	8.28378e+07	9.6599e+07	1.64168e+08	6.60236e+07	1.74595e+08	2.76724e+07	7.87906e+07	1.01298e+08		1.39817e+08	1.02407e+08	9.55889e+07	1.01173e+08	3.72654e+07	5.28426e+07		0.732437	0.56985	0.683673	0.527111	0.933421	0.861099
P46471	26S protease regulatory subunit 7 OS=Mus musculus GN=Psmc2 PE=1 SV=5 - [PRS7_MOUSE]	433	48.6171	5.94775	9.04354e+06	866739	3.62432e+07	1.43158e+07	2.0697e+07	1.57377e+07	1.97523e+07	2.2491e+07	2.24977e+07	2.35617e+07	2.05588e+07	2.41057e+07		1.51173e+07	1.96695e+07	2.2681e+07	1.31045e+07	2.47398e+06	1.35488e+06		1.30112	0.575947	1.50033	0.358424	1.1531	0.11392
Q9WVD5	Mitochondrial ornithine transporter 1 OS=Mus musculus GN=Slc25a15 PE=1 SV=1 - [ORNT1_MOUSE]	301	32.8017	8.85107	866739	2.84618e+07	866739	866739	866739	7.46669e+07	866739	866739	8.41124e+07	866739	866739	866739		7.76552e+06	1.93168e+07	2.16781e+07	1.1949e+07	3.19564e+07	3.60464e+07		2.48751	0.578966	2.79159	0.549134	1.12224	0.9351
Q9DCY0	Glycine N-acyltransferase-like protein Keg1 OS=Mus musculus GN=Keg1 PE=1 SV=1 - [KEG1_MOUSE]	295	33.7011	8.42627	1.30011e+06	5.65601e+07	1.84733e+07	1.30011e+06	1.30011e+06	1.30011e+06	3.68629e+07	1.30011e+06	1.30011e+06	1.30011e+06	1.30011e+06	1.30011e+06		1.94084e+07	1.01908e+07	1.30011e+06	2.25663e+07	1.53991e+07	0		0.525071	0.580251	0.0669868	0.213938	0.127577	0.355918
Q922B2	Aspartate--tRNA ligase, cytoplasmic OS=Mus musculus GN=Dars PE=1 SV=2 - [SYDC_MOUSE]	501	57.1112	6.49365	2.99445e+07	1.73348e+06	1.73348e+06	8.25514e+07	5.28247e+07	1.73348e+06	1.73348e+06	1.54367e+08	1.73348e+06	1.73348e+06	1.73348e+06	1.73348e+06		2.89907e+07	5.26646e+07	1.73348e+06	3.29984e+07	6.23123e+07	0		1.8166	0.582053	0.0597943	0.202466	0.0329155	0.206617
P58710	L-gulonolactone oxidase OS=Mus musculus GN=Gulo PE=1 SV=3 - [GGLO_MOUSE]	440	50.4455	8.23584	1.48711e+08	1.44172e+08	2.16668e+08	2.14058e+08	3.88923e+08	2.60022e+06	5.93932e+07	7.41532e+07	6.92268e+07	7.26565e+08	3.62705e+07	3.05289e+08		1.80902e+08	1.31267e+08	2.84338e+08	3.45103e+07	1.51137e+08	2.75596e+08		0.725626	0.599249	1.57178	0.542771	2.16609	0.431289
Q9EP75	Leukotriene-B4 omega-hydroxylase 3 OS=Mus musculus GN=Cyp4f14 PE=1 SV=1 - [CP4FE_MOUSE]	524	59.7619	6.87354	5.63415e+07	5.01192e+07	1.01713e+08	5.14737e+07	3.67789e+07	3.53109e+07	9.92714e+07	4.50623e+07	3.601e+07	1.59893e+08	6.396e+07	4.38328e+07		6.49119e+07	5.41059e+07	7.5924e+07	2.13728e+07	2.634e+07	4.95403e+07		0.833528	0.601031	1.16965	0.735792	1.40325	0.525689
Q9CWJ9	Bifunctional purine biosynthesis protein PURH OS=Mus musculus GN=Atic PE=1 SV=2 - [PUR9_MOUSE]	592	64.1771	6.75635	3.63054e+07	1.71918e+07	1.93506e+07	3.59225e+07	2.19687e+07	2.12201e+07	3.10843e+07	5.47729e+07	2.14566e+07	2.58882e+07	1.30011e+06	2.44749e+07		2.71926e+07	3.22615e+07	1.82799e+07	8.95499e+06	1.35647e+07	9.93313e+06		1.18641	0.608539	0.672241	0.292281	0.566618	0.19983
Q6NZJ6	Eukaryotic translation initiation factor 4 gamma 1 OS=Mus musculus GN=Eif4g1 PE=1 SV=1 - [IF4G1_MOUSE]	1600	175.967	5.40186	866739	866739	866739	1.53043e+07	7.14343e+06	866739	866739	866739	866739	866739	866739	866739		4.47613e+06	2.43591e+06	866739	6.25165e+06	2.71789e+06	0		0.5442	0.622745	0.193636	0.355918	0.355817	0.355918
Q91ZA3	Propionyl-CoA carboxylase alpha chain, mitochondrial OS=Mus musculus GN=Pcca PE=1 SV=2 - [PCCA_MOUSE]	724	79.8711	7.25439	2.88289e+07	3.16285e+07	3.95364e+07	3.37503e+07	2.73912e+07	866739	7.04241e+07	866739	866739	866739	866739	866739		3.3436e+07	2.48872e+07	866739	3.93083e+06	2.84334e+07	0		0.744322	0.624406	0.0259223	7.16549e-06	0.0348267	0.193733
Q9DCS2	UPF0585 protein C16orf13 homolog OS=Mus musculus PE=1 SV=1 - [CP013_MOUSE]	204	22.6725	6.52197	177116066	8.84351e+07	1.03522e+08	5.42044e+07	1.37166e+08	1.51391e+08	1.86106e+08	3.38822e+07	1.40982e+08	2.2955e+07	4.1131e+07	1.37992e+08		1.05819e+08	1.27136e+08	8.57651e+07	4.48743e+07	5.67067e+07	5.41154e+07		1.20144	0.627885	0.810485	0.638805	0.674592	0.395877
Q8CGK3	Lon protease homolog, mitochondrial OS=Mus musculus GN=Lonp1 PE=1 SV=2 - [LONM_MOUSE]	949	105.776	6.56592	4.06215e+07	8.75918e+07	3.34343e+07	5.35026e+07	2.73753e+07	2.20787e+07	6.05643e+07	7.07489e+07	6.2648e+07	1.31183e+08	1.29386e+07	7.69097e+07		5.37876e+07	4.51918e+07	7.09198e+07	2.07991e+07	2.08634e+07	4.21241e+07		0.840191	0.631318	1.31852	0.550914	1.56931	0.379742
Q01405	Protein transport protein Sec23A OS=Mus musculus GN=Sec23a PE=1 SV=2 - [SC23A_MOUSE]	765	86.1064	7.07861	1.73348e+06	3.93394e+07	1.15001e+07	3.04273e+07	1.80278e+07	7.11099e+06	1.65872e+07	7.77408e+07	1.73348e+06	1.73348e+06	1.73348e+06	3.5381e+07		2.07501e+07	2.98667e+07	1.01454e+07	1.48863e+07	2.79565e+07	1.45698e+07		1.43936	0.635842	0.488932	0.41181	0.339688	0.320186
P52430	Serum paraoxonase/arylesterase 1 OS=Mus musculus GN=Pon1 PE=1 SV=2 - [PON1_MOUSE]	355	39.5403	5.22412	1.83058e+08	1.54296e+08	2.3201e+08	2.10182e+08	1.05594e+08	1.07553e+08	3.79353e+08	3.27558e+08	6.52123e+08	4.0731e+08	3.97338e+07	4.36245e+08		1.94886e+08	2.30015e+08	3.83853e+08	2.91531e+07	1.24794e+08	2.20047e+08		1.18025	0.651737	1.96962	0.190782	1.66882	0.332758
Q9WUR2	Enoyl-CoA delta isomerase 2, mitochondrial OS=Mus musculus GN=Eci2 PE=1 SV=2 - [ECI2_MOUSE]	391	43.24	8.92432	2.67468e+08	4.4411e+08	3.25361e+07	4.84972e+08	3.65631e+08	6.74366e+08	5.22931e+08	1.30011e+06	3.50886e+08	4.69031e+07	1.30011e+06	4.21539e+08		3.07272e+08	3.91057e+08	2.05157e+08	1.78442e+08	2.50106e+08	1.8348e+08		1.27268	0.653373	0.667674	0.51537	0.524622	0.339265
Q8CFX1	GDH/6PGL endoplasmic bifunctional protein OS=Mus musculus GN=H6pd PE=1 SV=2 - [G6PE_MOUSE]	789	88.8717	6.93213	1.73348e+06	1.73348e+06	6.53026e+07	1.73348e+06	7.60338e+07	1.73348e+06	3.57356e+07	1.73348e+06	5.04512e+07	5.37597e+07	1.73348e+06	1.09541e+08		1.76257e+07	2.88091e+07	5.38713e+07	2.75262e+07	3.05955e+07	3.81745e+07		1.63449	0.654509	3.0564	0.230628	1.86994	0.409068
P58252	Elongation factor 2 OS=Mus musculus GN=Eef2 PE=1 SV=2 - [EF2_MOUSE]	858	95.2529	6.82959	9.192e+08	1.25788e+09	1.4174e+09	1.12813e+09	1.25476e+09	9.98109e+08	1.43448e+09	1.29524e+09	8.60737e+08	1.52113e+09	1.30513e+09	1.43879e+09		1.18065e+09	1.24565e+09	1.28145e+09	1.82433e+08	1.577e+08	2.54836e+08		1.05505	0.657073	1.08537	0.597636	1.02874	0.842928
Q8VDD5	Myosin-9 OS=Mus musculus GN=Myh9 PE=1 SV=4 - [MYH9_MOUSE]	1960	226.232	5.65576	8.52347e+07	1.58168e+08	2.99786e+08	1.78387e+08	1.68485e+08	2.40518e+08	1.36315e+08	2.785e+08	2.63725e+08	5.3657e+08	1.89734e+08	2.35643e+08		1.80394e+08	2.05954e+08	3.06418e+08	7.71487e+07	5.63717e+07	1.35478e+08		1.14169	0.65945	1.69861	0.211015	1.4878	0.280512
Q80XL6	Acyl-CoA dehydrogenase family member 11 OS=Mus musculus GN=Acad11 PE=1 SV=2 - [ACD11_MOUSE]	779	87.3107	8.42627	3.60882e+07	7.52976e+07	5.8801e+07	6.28846e+07	5.60282e+07	5.8467e+07	1.04885e+08	4.27413e+07	4.88761e+07	6.57699e+07	6.34046e+07	1.83628e+08		5.82679e+07	6.55305e+07	9.04196e+07	1.41734e+07	2.34965e+07	5.42011e+07		1.12464	0.662786	1.55179	0.358596	1.37981	0.493044
P10853	Histone H2B type 1-F/J/L OS=Mus musculus GN=Hist1h2bf PE=1 SV=2 - [H2B1F_MOUSE]	126	13.9276	10.3159	2.92295e+07	1.20374e+08	1.55788e+08	1.34363e+08	8.76736e+07	9.74138e+07	2.61758e+08	8.61956e+07	4.89505e+07	4.37135e+08	3.71139e+07	1.32571e+08		1.09939e+08	1.3326e+08	1.63942e+08	4.82743e+07	7.43134e+07	1.61962e+08		1.21213	0.664544	1.49122	0.599947	1.23024	0.775589
Q8K1Z0	Ubiquinone biosynthesis protein COQ9, mitochondrial OS=Mus musculus GN=Coq9 PE=1 SV=1 - [COQ9_MOUSE]	313	35.0605	5.92236	866739	866739	1.94519e+07	2.37711e+07	866739	2.93851e+07	3.30411e+07	866739	2.4947e+07	866739	866739	866739		1.12391e+07	1.60399e+07	6.88679e+06	1.04842e+07	1.52281e+07	1.0427e+07		1.42715	0.668676	0.612752	0.628383	0.429353	0.423323
Q64176	Carboxylesterase 1E OS=Mus musculus GN=Ces1e PE=1 SV=1 - [EST1E_MOUSE]	562	61.5426	6.15088	1.11626e+07	5.09169e+07	1.96445e+07	2.27775e+07	1.32992e+07	1.41858e+07	5.14563e+07	866739	866739	1.90071e+07	6.52924e+07	1.24553e+07		2.61254e+07	1.9952e+07	2.44054e+07	1.49308e+07	1.89359e+07	2.44835e+07		0.763701	0.673007	0.934164	0.920646	1.22321	0.811509
Q8BMS1	Trifunctional enzyme subunit alpha, mitochondrial OS=Mus musculus GN=Hadha PE=1 SV=1 - [ECHA_MOUSE]	763	82.6175	9.14404	1.60254e+09	2.30765e+09	2.12535e+09	2.95847e+09	2.41547e+09	2.57657e+09	3.00928e+09	1.67713e+09	2.30934e+09	4.07444e+09	2.25918e+09	3.08738e+09		2.2485e+09	2.41961e+09	2.93258e+09	4.84764e+08	4.8053e+08	7.36494e+08		1.0761	0.679328	1.30424	0.227593	1.21201	0.351321
Q8JZU2	Tricarboxylate transport protein, mitochondrial OS=Mus musculus GN=Slc25a1 PE=1 SV=1 - [TXTP_MOUSE]	311	33.9099	9.89111	1.15966e+08	1.30011e+06	1.31132e+08	1.28335e+08	1.19574e+08	1.18446e+08	9.08612e+07	1.01958e+08	1.52181e+08	1.01293e+08	1.28202e+08	8.37566e+07		9.41832e+07	1.0771e+08	1.16358e+08	5.39289e+07	1.19686e+07	2.60452e+07		1.14362	0.686259	1.23545	0.545015	1.08029	0.619991
Q99KR3	Beta-lactamase-like protein 2 OS=Mus musculus GN=Lactb2 PE=1 SV=1 - [LACB2_MOUSE]	288	32.7338	6.32861	1.73348e+06	1.6746e+08	1.13384e+08	7.74371e+07	1.82088e+07	1.64881e+08	2.27373e+08	5.11563e+07	1.28457e+08	1.22855e+08	1.82972e+08	1.3936e+08		9.00036e+07	1.15405e+08	1.43411e+08	6.01989e+07	8.44982e+07	2.35989e+07		1.28223	0.686301	1.59339	0.202484	1.24268	0.600303
Q91WU0	Carboxylesterase 1F OS=Mus musculus OX=10090 GN=Ces1f PE=1 SV=1 - [EST1F_MOUSE]	561	61.5732	6.48096	3.43281e+08	5.52245e+08	6.27543e+08	5.33179e+08	5.09213e+08	3.78941e+08	5.46193e+08	5.03895e+08	3.21755e+08	3.07644e+08	5.48647e+08	5.49921e+08		5.14062e+08	4.8456e+08	4.31992e+08	1.04723e+08	6.31182e+07	1.17399e+08		0.942611	0.690564	0.84035	0.401042	0.891513	0.520031
Q9CXS4	Centromere protein V OS=Mus musculus GN=Cenpv PE=2 SV=2 - [CENPV_MOUSE]	252	27.5238	9.78857	866739	866739	5.43524e+06	1.80417e+07	1.39626e+07	866739	866739	866739	866739	5.80117e+06	866739	5.3838e+06		6.3026e+06	4.14071e+06	3.22961e+06	7.0295e+06	5.67068e+06	2.36748e+06		0.656984	0.692851	0.512426	0.499992	0.779967	0.80591
E9PVA8	eIF-2-alpha kinase activator GCN1 OS=Mus musculus GN=Gcn1 PE=1 SV=1 - [GCN1_MOUSE]	2671	292.834	7.35693	866739	1.45411e+07	1.5586e+07	1.49719e+07	1.33585e+07	866739	1.5845e+07	7.8623e+06	866739	6.74459e+06	866739	1.59935e+07		1.14914e+07	9.48313e+06	6.1179e+06	6.14539e+06	5.75241e+06	6.18608e+06		0.825235	0.693794	0.532388	0.326854	0.645136	0.515976
Q6P5E4	UDP-glucose:glycoprotein glucosyltransferase 1 OS=Mus musculus GN=Uggt1 PE=1 SV=4 - [UGGG1_MOUSE]	1551	176.323	5.61768	3.20109e+06	1.46865e+07	2.14894e+07	3.66846e+07	1.18819e+07	1.24741e+07	2.20849e+07	1.75279e+07	1.24996e+07	1.43676e+07	1.58879e+07	2.17845e+07		1.90154e+07	1.59922e+07	1.61349e+07	1.21156e+07	4.14579e+06	3.47554e+06		0.841011	0.69679	0.848516	0.705918	1.00892	0.965038
Q91VS7	Microsomal glutathione S-transferase 1 OS=Mus musculus GN=Mgst1 PE=1 SV=3 - [MGST1_MOUSE]	155	17.5401	9.65674	1835472235	2.48104e+09	2.56392e+09	2821345527	2.30947e+09	2.14592e+09	2.96066e+09	1.77552e+09	2.26583e+09	1.88965e+09	2.22282e+09	3.19586e+09		2.42545e+09	2.29789e+09	2.39354e+09	3.62999e+08	4.28767e+08	4.8556e+08		0.947409	0.707717	0.986846	0.930337	1.04163	0.806682
P41216	Long-chain-fatty-acid--CoA ligase 1 OS=Mus musculus GN=Acsl1 PE=1 SV=2 - [ACSL1_MOUSE]	699	77.9014	7.15186	2.1341e+09	2.12781e+09	1.22561e+09	2.65213e+09	2.30193e+09	2.29424e+09	2.44331e+09	1.62773e+09	2.27625e+09	1.80888e+09	1.87228e+09	2.41559e+09		2.03491e+09	2.1668e+09	2.09325e+09	5.1342e+08	3.16843e+08	2.584e+08		1.06481	0.717995	1.02867	0.866234	0.966057	0.765903
P70168	Importin subunit beta-1 OS=Mus musculus GN=Kpnb1 PE=1 SV=2 - [IMB1_MOUSE]	876	97.1221	4.77979	1.30011e+06	1.1928e+07	1.30011e+06	1.02723e+07	1.30011e+06	1.30011e+06	1.30011e+06	1.43638e+07	1.30011e+06	1.55062e+07	2.59923e+07	1.30011e+06		6.20012e+06	4.56602e+06	1.10247e+07	4.93486e+06	5.65673e+06	1.04073e+07		0.73644	0.719119	1.77814	0.495454	2.4145	0.381422
P97450	ATP synthase-coupling factor 6, mitochondrial OS=Mus musculus GN=Atp5j PE=1 SV=1 - [ATP5J_MOUSE]	108	12.4886	9.36377	2.8262e+08	3.45073e+08	3.70777e+08	1.76042e+08	1.2509e+08	3.29174e+08	2.3821e+08	3.84835e+08	1.98941e+08	5.58112e+08	1.15586e+08	1.369e+08		2.93628e+08	2.69327e+08	2.52385e+08	7.5077e+07	9.8357e+07	1.79148e+08		0.91724	0.745329	0.859538	0.725674	0.937092	0.890526
Q91Y97	Fructose-bisphosphate aldolase B OS=Mus musculus GN=Aldob PE=1 SV=3 - [ALDOB_MOUSE]	364	39.4821	8.26514	5.94834e+09	5.78644e+09	6.13184e+09	2.89176e+09	3.92363e+09	4.85135e+09	4.53446e+09	6.22226e+09	4.53554e+09	7.39236e+09	2.66461e+09	8.45481e+09		5.18959e+09	4.88292e+09	5.76183e+09	1.33227e+09	8.42093e+08	2.29169e+09		0.940907	0.747582	1.11027	0.721334	1.18	0.555893
Q8K157	Aldose 1-epimerase OS=Mus musculus GN=Galm PE=1 SV=1 - [GALM_MOUSE]	342	37.7751	6.7417	1.16274e+08	2.04883e+08	2.0337e+08	1.85453e+08	1.60457e+08	2.79591e+08	1.17528e+08	9.04637e+07	1.07358e+08	1.93445e+08	1.08517e+08	1.76731e+08		1.77495e+08	1.6201e+08	1.46513e+08	3.61628e+07	7.23277e+07	3.90272e+07		0.912757	0.75141	0.825447	0.352102	0.904345	0.755062
O55125	Protein NipSnap homolog 1 OS=Mus musculus GN=Nipsnap1 PE=1 SV=1 - [NIPS1_MOUSE]	284	33.342	9.43701	5.43896e+07	166214816	7.20851e+07	8.40268e+07	866739	461628181	866739	6.32182e+07	866739	2.27482e+08	866739	866739		9.41791e+07	1.31645e+08	5.75206e+07	4.29056e+07	1.92209e+08	9.81273e+07		1.39782	0.752972	0.610757	0.57492	0.436937	0.573637
Q78JT3	3-hydroxyanthranilate 3,4-dioxygenase OS=Mus musculus GN=Haao PE=1 SV=1 - [3HAO_MOUSE]	286	32.7836	6.53662	9.44288e+08	1.01681e+09	1.78515e+09	9.25158e+08	1.25271e+09	1.07457e+09	1.40238e+09	1.22638e+09	7.39744e+08	7.19633e+08	1.28731e+09	1.09991e+09		1.16785e+09	1.23901e+09	9.6165e+08	3.58035e+08	1.16273e+08	2.41343e+08		1.06093	0.754493	0.823433	0.439792	0.776144	0.123095
P26043	Radixin OS=Mus musculus GN=Rdx PE=1 SV=3 - [RADI_MOUSE]	583	68.5003	6.20166	9.51339e+07	1.59689e+08	1.63107e+08	4.24554e+07	1.099e+08	1.03143e+08	1.08996e+08	1.01695e+08	9.32539e+07	1.1036e+08	9.72329e+07	1.00822e+08		1.15096e+08	1.05934e+08	1.00417e+08	4.99218e+07	3.56584e+06	6.33388e+06		0.92039	0.761912	0.872462	0.631403	0.947926	0.23669
P46656	Adrenodoxin, mitochondrial OS=Mus musculus GN=Fdx1 PE=1 SV=1 - [ADX_MOUSE]	188	20.11	5.61768	1.10554e+08	1.34699e+08	5.22611e+07	9.66569e+07	8.52149e+07	119314045	1.1695e+08	9.64189e+07	7.45842e+07	7.05393e+07	866739	9.37101e+07		9.85426e+07	1.04475e+08	5.99251e+07	2.99878e+07	1.4245e+07	3.52025e+07		1.0602	0.767424	0.608113	0.198204	0.573585	0.0884322
Q9D7B6	Isobutyryl-CoA dehydrogenase, mitochondrial OS=Mus musculus GN=Acad8 PE=1 SV=2 - [ACAD8_MOUSE]	413	44.9904	8.1333	1.30011e+06	2.92575e+07	2.44436e+07	2.78686e+07	1.30011e+06	1.30011e+06	1.13428e+08	1.30011e+06	3.58479e+07	3.50396e+07	6.02529e+06	7.85906e+07		2.07175e+07	2.93322e+07	3.88759e+07	1.13467e+07	4.8553e+07	2.58858e+07		1.41582	0.774842	1.87648	0.308385	1.32537	0.77399
O54734	Dolichyl-diphosphooligosaccharide--protein glycosyltransferase 48 kDa subunit OS=Mus musculus GN=Ddost PE=1 SV=2 - [OST48_MOUSE]	441	48.997	5.8335	1.96922e+08	4.15294e+07	1.54166e+08	1.33162e+08	7.43026e+07	1.69414e+08	1.45912e+08	9.08059e+07	5.39769e+07	4.53543e+08	7.70857e+07	7.5688e+07		1.31445e+08	1.20109e+08	1.65073e+08	5.67698e+07	3.89028e+07	1.668e+08		0.913758	0.785004	1.25584	0.752202	1.37437	0.665306
Q8VCT4	Carboxylesterase 1D OS=Mus musculus GN=Ces1d PE=1 SV=1 - [CES1D_MOUSE]	565	61.7487	6.60986	1.54032e+09	1.8202e+09	1.94253e+09	1.77681e+09	2.06535e+09	2.12597e+09	2.24572e+09	9.80997e+08	1.29653e+09	2.01597e+09	1.97857e+09	1.69051e+09		1.76997e+09	1.85451e+09	1.7454e+09	1.45847e+08	5.08482e+08	2.8813e+08		1.04777	0.791208	0.986118	0.899463	0.941163	0.757388
P29758	Ornithine aminotransferase, mitochondrial OS=Mus musculus GN=Oat PE=1 SV=1 - [OAT_MOUSE]	439	48.3239	6.62451	4.8351e+08	6.97603e+08	8.74281e+08	6.80794e+08	6.4536e+08	4.73254e+08	1.14199e+09	6.57352e+08	3.82303e+08	1.21851e+09	6.81408e+08	4.75251e+08		6.84047e+08	7.29489e+08	6.89367e+08	1.38382e+08	2.49045e+08	3.24109e+08		1.06643	0.791621	1.00778	0.979988	0.945	0.870585
P70441	Na(+)/H(+) exchange regulatory cofactor NHE-RF1 OS=Mus musculus GN=Slc9a3r1 PE=1 SV=3 - [NHRF1_MOUSE]	355	38.5765	5.89697	866739	866739	2.52478e+07	866739	866739	866739	1.71652e+07	866739	866739	1.64139e+07	866739	1.7403e+07		6.96202e+06	4.94135e+06	8.8876e+06	1.05573e+07	7.05743e+06	8.02848e+06		0.709758	0.792098	1.27658	0.809848	1.79862	0.546168
Q9CY16	28S ribosomal protein S28, mitochondrial OS=Mus musculus GN=Mrps28 PE=1 SV=1 - [RT28_MOUSE]	186	20.5077	8.92432	866739	6.44898e+06	6.90043e+06	3.67661e+06	8.08574e+06	866739	2.43841e+06	9.1544e+06	9.78066e+06	1.10966e+07	866739	866739		4.47319e+06	5.13632e+06	5.65268e+06	2.42055e+06	3.54796e+06	4.8085e+06		1.14825	0.798099	1.26368	0.717392	1.10053	0.885934
Q9CQE1	Protein NipSnap homolog 3B OS=Mus musculus GN=Nipsnap3b PE=1 SV=1 - [NPS3B_MOUSE]	247	28.2905	9.48096	4.58846e+07	866739	5.10603e+07	866739	6.24733e+07	5.76711e+07	866739	866739	5.53799e+07	866739	866739	4.0847e+07		2.46696e+07	3.04695e+07	2.44901e+07	2.38731e+07	2.96514e+07	2.41757e+07		1.2351	0.800693	0.992724	0.992995	0.803759	0.79569
Q8QZS1	3-hydroxyisobutyryl-CoA hydrolase, mitochondrial OS=Mus musculus GN=Hibch PE=1 SV=1 - [HIBCH_MOUSE]	385	43.0102	8.06006	1.74487e+07	3.96098e+08	1.78502e+07	7.71891e+07	1.11336e+08	1.36724e+08	2.27802e+08	1.31862e+08	2.50158e+08	2.3236e+08	3.16189e+07	2.0047e+08		1.27146e+08	1.51931e+08	1.78652e+08	1.5717e+08	4.48285e+07	8.67358e+07		1.19493	0.8016	1.40508	0.636907	1.17587	0.652244
O88587	Catechol O-methyltransferase OS=Mus musculus GN=Comt PE=1 SV=2 - [COMT_MOUSE]	265	29.4673	5.8335	3.44316e+08	3.60108e+08	6.41909e+08	4.85091e+08	4.83895e+08	4.30622e+08	5.41425e+08	4.51141e+08	4.78503e+08	3.49292e+08	5.08931e+08	6.96472e+08		4.57856e+08	4.76771e+08	5.08299e+08	1.19439e+08	4.18854e+07	1.24077e+08		1.04131	0.804414	1.11017	0.630041	1.06613	0.691183
P49722	Proteasome subunit alpha type-2 OS=Mus musculus GN=Psma2 PE=1 SV=3 - [PSA2_MOUSE]	234	25.9103	7.43018	866739	4.08217e+07	7.78744e+07	866739	866739	4.32313e+07	5.99678e+07	3.83441e+07	4.22808e+07	4.43164e+07	6.5532e+07	6.38138e+07		3.01074e+07	3.56025e+07	5.39858e+07	3.20411e+07	2.15984e+07	1.07286e+07		1.18252	0.81365	1.79311	0.266829	1.51635	0.234862
P16546	Spectrin alpha chain, non-erythrocytic 1 OS=Mus musculus GN=Sptan1 PE=1 SV=4 - [SPTN1_MOUSE]	2472	284.422	5.32568	2.16685e+06	2.44207e+07	2.05735e+07	1.29684e+07	1.98488e+07	7.36861e+06	2.16685e+06	3.99535e+07	2.16685e+06	4.08118e+07	4.52065e+07	4.24438e+07		1.50323e+07	1.73344e+07	3.26572e+07	8.4945e+06	1.45544e+07	1.76736e+07		1.15314	0.820829	2.17246	0.170524	1.88395	0.290421
Q8K0C4	Lanosterol 14-alpha demethylase OS=Mus musculus GN=Cyp51a1 PE=1 SV=1 - [CP51A_MOUSE]	503	56.7394	8.41162	1.13662e+07	3.11243e+07	4.38345e+07	1.64303e+07	2.55331e+07	2.16303e+07	2.11994e+07	4.22463e+07	2.81884e+07	2.69018e+07	3.70951e+07	2.08863e+08		2.56888e+07	2.76523e+07	7.52621e+07	1.27443e+07	8.59333e+06	7.72344e+07		1.07643	0.832236	2.92976	0.314749	2.72173	0.329458
P97742	Carnitine O-palmitoyltransferase 1, liver isoform OS=Mus musculus GN=Cpt1a PE=1 SV=4 - [CPT1A_MOUSE]	773	88.1947	8.6167	7.23724e+07	3.15715e+07	3.5928e+07	6.71236e+07	3.18549e+07	2.7584e+07	4.02465e+07	1.28273e+08	2.8651e+07	2.37785e+08	3.65548e+07	4.10391e+07		5.17489e+07	5.69896e+07	8.60076e+07	1.816e+07	4.14067e+07	8.77412e+07		1.10127	0.847518	1.66202	0.53241	1.50918	0.62297
Q9Z0X1	Apoptosis-inducing factor 1, mitochondrial OS=Mus musculus GN=Aifm1 PE=1 SV=1 - [AIFM1_MOUSE]	612	66.7238	9.17334	5.24297e+07	1.33091e+08	1.87064e+08	1.30153e+08	7.18772e+07	7.81151e+07	9.57071e+07	2.23048e+08	1.1379e+08	1.26391e+08	9.7705e+07	1.91327e+08		1.25684e+08	1.17187e+08	1.32303e+08	4.79804e+07	6.17403e+07	3.55618e+07		0.93239	0.8569	1.05266	0.854102	1.129	0.725875
P00186	Cytochrome P450 1A2 OS=Mus musculus GN=Cyp1a2 PE=1 SV=1 - [CP1A2_MOUSE]	513	58.1471	8.76318	1.81631e+08	1.77727e+08	3.30111e+08	1.90751e+08	2.4628e+08	2.01573e+08	4.0659e+08	8.10042e+07	3.00867e+08	6.56786e+07	9.98017e+07	5.08283e+08		2.20055e+08	2.33862e+08	2.43658e+08	6.37164e+07	1.16616e+08	1.7725e+08		1.06274	0.86311	1.10726	0.835367	1.04189	0.938863
Q9Z1Q9	Valine--tRNA ligase OS=Mus musculus GN=Vars PE=1 SV=1 - [SYVC_MOUSE]	1263	140.127	7.76709	3.1687e+07	2.53869e+07	4.07119e+07	2.34135e+07	1.30011e+06	7.92905e+06	5.56139e+07	6.82338e+07	1.30011e+06	1.43525e+07	1.71748e+07	5.31859e+07		3.02998e+07	3.32692e+07	2.15033e+07	6.74339e+06	2.90945e+07	1.92473e+07		1.098	0.868936	0.709685	0.48326	0.646344	0.580381
Q8VEM8	Phosphate carrier protein, mitochondrial OS=Mus musculus GN=Slc25a3 PE=1 SV=1 - [MPCP_MOUSE]	357	39.6065	9.26123	7.95226e+07	7.98324e+07	2.25562e+07	1.14116e+08	1.24189e+08	1.30011e+06	1.29715e+08	6.47711e+07	1.78704e+08	2.37957e+08	1.35981e+08	1.16408e+08		7.40068e+07	7.9994e+07	1.67262e+08	3.28643e+07	5.20814e+07	4.66192e+07		1.0809	0.871808	2.2601	0.0298861	2.09094	0.0738255
Q9Z0M5	Lysosomal acid lipase/cholesteryl ester hydrolase OS=Mus musculus GN=Lipa PE=1 SV=2 - [LICH_MOUSE]	397	45.296	8.07471	8.1393e+06	3.762e+07	3.40457e+07	4.29778e+07	2.94682e+07	3.40891e+07	4.97585e+07	866739	2.65438e+07	866739	6.08924e+07	5.10662e+07		3.06957e+07	2.85456e+07	3.48423e+07	1.34053e+07	1.76613e+07	2.32649e+07		0.929955	0.872135	1.13509	0.798055	1.22058	0.721703
Q9QZ85	Interferon-inducible GTPase 1 OS=Mus musculus GN=Iigp1 PE=1 SV=2 - [IIGP1_MOUSE]	413	47.5415	6.32861	3.49452e+07	3.63247e+07	6.19938e+07	866739	3.06859e+07	3.35681e+07	4.18482e+07	3.6209e+07	5.12405e+07	6.36356e+07	866739	4.28138e+07		3.35326e+07	3.55778e+07	3.96392e+07	2.17192e+07	4.11355e+06	2.35786e+07		1.06099	0.877944	1.18211	0.752663	1.11416	0.778733
Q3UPH1	Protein PRRC1 OS=Mus musculus GN=Prrc1 PE=1 SV=1 - [PRRC1_MOUSE]	443	46.2685	5.94775	866739	866739	1.05615e+07	6.50501e+07	866739	866739	6.09812e+07	866739	866739	1.23439e+07	866739	6.01757e+07		1.93363e+07	1.58954e+07	1.85633e+07	2.6688e+07	2.60303e+07	2.44776e+07		0.822049	0.878233	0.960022	0.971706	1.16784	0.901327
Q99MN9	Propionyl-CoA carboxylase beta chain, mitochondrial OS=Mus musculus GN=Pccb PE=1 SV=2 - [PCCB_MOUSE]	541	58.3719	7.66455	5.34355e+07	6.55826e+07	7.16416e+07	1.21542e+08	9.64856e+07	9.09561e+07	6.73912e+07	6.76059e+07	2.17351e+07	6.65419e+07	3.48992e+07	9.7233e+07		7.80503e+07	8.06097e+07	5.51023e+07	2.59513e+07	1.32563e+07	2.9272e+07		1.03279	0.884078	0.705984	0.348813	0.683569	0.218302
Q9JM62	Receptor expression-enhancing protein 6 OS=Mus musculus GN=Reep6 PE=1 SV=1 - [REEP6_MOUSE]	201	22.1896	7.32764	1.74243e+08	1.80343e+08	227614780	1.00104e+09	2.80734e+08	5.69971e+08	3.36958e+08	2.72944e+08	3.0091e+08	423653825	2.35732e+08	358193113		3.95811e+08	3.65152e+08	3.29622e+08	3.50041e+08	1.20804e+08	6.94585e+07		0.922542	0.890666	0.832778	0.758919	0.902699	0.674236
Q9EQK5	Major vault protein OS=Mus musculus GN=Mvp PE=1 SV=4 - [MVP_MOUSE]	861	95.8652	5.59229	1.73348e+06	3.5769e+07	5.46499e+06	1.73348e+06	4.75828e+07	1.73348e+06	1.73348e+06	1.73348e+06	1.73348e+06	1.67325e+07	1.73348e+06	1.73348e+06		1.11752e+07	1.31958e+07	5.48323e+06	1.42807e+07	1.98533e+07	6.49476e+06		1.18081	0.890894	0.490659	0.552881	0.415528	0.546116
Q9D0J8	Parathymosin OS=Mus musculus GN=Ptms PE=1 SV=3 - [PTMS_MOUSE]	101	11.4231	4.22119	1.65715e+08	2.59657e+08	2.58502e+08	2.4338e+08	2.42801e+08	5.28027e+07	2.88468e+08	3.11571e+08	6.54874e+07	3.30282e+08	2.73213e+08	2.8117e+08		2.31814e+08	2.23911e+08	2.37538e+08	3.86988e+07	1.01841e+08	1.0171e+08		0.965908	0.904118	1.02469	0.930369	1.06086	0.875123
Q99PL5	Ribosome-binding protein 1 OS=Mus musculus GN=Rrbp1 PE=1 SV=2 - [RRBP1_MOUSE]	1605	172.776	9.33447	5.87851e+07	7.21402e+07	1.92915e+08	2.7593e+08	2.69277e+08	1.0002e+08	1.57237e+08	3.94705e+07	2.1675e+08	1.00484e+08	6.25896e+07	2.14974e+08		1.49942e+08	1.41501e+08	1.48699e+08	8.95577e+07	8.4713e+07	6.84889e+07		0.943702	0.90946	0.99171	0.985384	1.05087	0.912612
Q91VI7	Ribonuclease inhibitor OS=Mus musculus GN=Rnh1 PE=1 SV=1 - [RINI_MOUSE]	456	49.7841	4.77979	3.27206e+07	1.43686e+07	1.30011e+06	3.4956e+07	4.30009e+07	4.41347e+07	1.30011e+06	1.30011e+06	4.14748e+07	3.99647e+07	5.04452e+07	6.71155e+07		2.08363e+07	2.2434e+07	4.975e+07	1.38211e+07	2.11376e+07	1.07967e+07		1.07667	0.916325	2.38766	0.0289734	2.21762	0.0932823
P10518	Delta-aminolevulinic acid dehydratase OS=Mus musculus GN=Alad PE=1 SV=1 - [HEM2_MOUSE]	330	36.0003	6.78564	7.79289e+07	1.86305e+08	1.92293e+08	1.30684e+08	2.03388e+08	1.54769e+08	2.30845e+08	1.62697e+07	1.93447e+08	2.16685e+06	1.68819e+08	1.60061e+08		1.46803e+08	1.51318e+08	1.31124e+08	4.64576e+07	8.2592e+07	7.54527e+07		1.03076	0.936913	0.893196	0.769592	0.866545	0.765117
Q8QZT1	Acetyl-CoA acetyltransferase, mitochondrial OS=Mus musculus GN=Acat1 PE=1 SV=1 - [THIL_MOUSE]	424	44.7873	8.51416	1.23069e+09	1.0016e+09	1.15322e+09	1.42949e+09	7.04057e+08	1.43384e+09	1.72292e+09	8.91991e+08	1.23806e+09	1.14882e+09	1.4821e+09	1.46557e+09		1.20375e+09	1.1882e+09	1.33364e+09	1.54194e+08	4.08778e+08	1.43822e+08		0.987083	0.952848	1.1079	0.327044	1.1224	0.582203
Q7TMK9	Heterogeneous nuclear ribonucleoprotein Q OS=Mus musculus GN=Syncrip PE=1 SV=2 - [HNRPQ_MOUSE]	623	69.5896	8.5874	2.80879e+07	1.30011e+06	3.51658e+07	3.34946e+07	1.97325e+07	1.8107e+07	6.19276e+07	1.30011e+06	1.30011e+06	1.2636e+08	1.88629e+07	3.59312e+07		2.45121e+07	2.52668e+07	4.56137e+07	1.36544e+07	2.23624e+07	4.82003e+07		1.03079	0.961831	1.86086	0.493143	1.80528	0.531811
Q9DCP2	Sodium-coupled neutral amino acid transporter 3 OS=Mus musculus GN=Slc38a3 PE=1 SV=1 - [S38A3_MOUSE]	505	55.555	7.09326	1.30011e+06	4.60594e+07	1.30011e+06	1.30011e+06	1.30011e+06	1.30011e+06	1.30011e+06	4.31802e+07	1.30011e+06	3.42551e+08	1.30011e+06	1.30011e+06		1.24899e+07	1.17701e+07	8.66129e+07	1.93814e+07	1.81346e+07	1.47766e+08		0.942369	0.96406	6.93461	0.422072	7.3587	0.417367
Q9DCJ5	NADH dehydrogenase [ubiquinone] 1 alpha subcomplex subunit 8 OS=Mus musculus GN=Ndufa8 PE=1 SV=3 - [NDUA8_MOUSE]	172	19.9791	8.45557	866739	4.38192e+07	866739	3.32943e+07	866739	8.0349e+07	866739	866739	866739	866739	866739	866739		1.97117e+07	2.07373e+07	866739	1.92089e+07	3.44168e+07	0		1.05203	0.965516	0.0439707	0.140187	0.0417962	0.355918
P50431	Serine hydroxymethyltransferase, cytosolic OS=Mus musculus GN=Shmt1 PE=1 SV=3 - [GLYC_MOUSE]	478	52.5675	6.94678	8.52063e+07	1.60082e+08	2.71478e+08	1.64302e+08	2.45913e+08	2.63119e+08	1.79453e+08	3.90033e+06	2.50469e+08	4.04111e+07	1.95153e+08	1.01299e+08		1.70267e+08	1.73096e+08	1.46833e+08	6.63669e+07	1.0256e+08	8.13545e+07		1.01662	0.969301	0.862369	0.712396	0.848273	0.740088
Q00519	Xanthine dehydrogenase/oxidase OS=Mus musculus GN=Xdh PE=1 SV=5 - [XDH_MOUSE]	1335	146.468	7.56201	1.30011e+06	2.10454e+07	6.399e+07	1.30011e+06	1.30011e+06	1.30011e+06	1.30011e+06	8.00303e+07	5.05064e+07	1.128e+08	1.30011e+06	8.59601e+07		2.19089e+07	2.09827e+07	6.26416e+07	2.55979e+07	3.40912e+07	4.17422e+07		0.957724	0.971203	2.85918	0.199712	2.9854	0.22912
Q9CPQ1	Cytochrome c oxidase subunit 6C OS=Mus musculus GN=Cox6c PE=1 SV=3 - [COX6C_MOUSE]	76	8.46351	10.1401	7.38472e+07	2.47634e+07	8.45166e+07	6.89459e+07	866739	1.17566e+08	1.28617e+08	866739	8.43292e+07	280161149	1.22141e+08	866739		6.30183e+07	6.19793e+07	1.21875e+08	2.27926e+07	6.12373e+07	1.01375e+08		0.983513	0.978921	1.93395	0.36443	1.96637	0.414751
P08003	Protein disulfide-isomerase A4 OS=Mus musculus GN=Pdia4 PE=1 SV=3 - [PDIA4_MOUSE]	638	71.9375	5.31299	1.42351e+08	5.43611e+07	6.25363e+07	2.14223e+08	3.90033e+06	1.34746e+08	1.8644e+08	1.54246e+08	3.90033e+06	9.88054e+07	1.14771e+08	1.42377e+07		1.18368e+08	1.19833e+08	5.79287e+07	6.51486e+07	6.94326e+07	4.93203e+07		1.01238	0.979598	0.489396	0.247433	0.483411	0.254808
Q9D6R2	Isocitrate dehydrogenase [NAD] subunit alpha, mitochondrial OS=Mus musculus GN=Idh3a PE=1 SV=1 - [IDH3A_MOUSE]	366	39.6131	6.72705	866739	866739	866739	866739	866739	866739	866739	866739	4.83738e+07	9.6054e+07	1.02318e+07	866739		866739	866739	3.88816e+07	0	0	3.74991e+07		1	#DIV/0!	44.8596	0.129633	44.8596	0.129633
P19536	Cytochrome c oxidase subunit 5B, mitochondrial OS=Mus musculus GN=Cox5b PE=1 SV=1 - [COX5B_MOUSE]	128	13.8039	8.38232	866739	866739	866739	866739	866739	866739	866739	866739	3.54496e+08	5.39126e+08	866739	866739		866739	866739	2.23839e+08	0	0	2.32331e+08		1	#DIV/0!	258.254	0.147519	258.254	0.147519
Q9EPU0	Regulator of nonsense transcripts 1 OS=Mus musculus GN=Upf1 PE=1 SV=2 - [RENT1_MOUSE]	1124	123.889	6.60986	866739	866739	866739	866739	866739	866739	866739	866739	866739	1.62997e+07	866739	4.56684e+07		866739	866739	1.59254e+07	0	0	1.82915e+07		1	#DIV/0!	18.3739	0.203778	18.3739	0.203778
P05064	Fructose-bisphosphate aldolase A OS=Mus musculus GN=Aldoa PE=1 SV=2 - [ALDOA_MOUSE]	364	39.3313	8.08936	866739	866739	866739	866739	866739	866739	866739	866739	866739	4.46539e+07	866739	1.47041e+07		866739	866739	1.52729e+07	0	0	1.78791e+07		1	#DIV/0!	17.6211	0.212295	17.6211	0.212295
Q9D892	Inosine triphosphate pyrophosphatase OS=Mus musculus GN=Itpa PE=1 SV=2 - [ITPA_MOUSE]	198	21.883	5.87158	866739	866739	866739	866739	866739	866739	866739	866739	866739	866739	866739	4.91306e+07		866739	866739	1.29327e+07	0	0	2.08989e+07		1	#DIV/0!	14.9211	0.355918	14.9211	0.355918
Q8JZN5	Acyl-CoA dehydrogenase family member 9, mitochondrial OS=Mus musculus GN=Acad9 PE=1 SV=2 - [ACAD9_MOUSE]	625	68.6787	7.45947	866739	866739	866739	866739	866739	866739	866739	866739	866739	866739	866739	6.03009e+07		866739	866739	1.57253e+07	0	0	2.57357e+07		1	#DIV/0!	18.143	0.355918	18.143	0.355918
P07310	Creatine kinase M-type OS=Mus musculus GN=Ckm PE=1 SV=1 - [KCRM_MOUSE]	381	43.0178	7.06396	1.30011e+06	1.30011e+06	1.30011e+06	1.30011e+06	1.30011e+06	1.30011e+06	1.30011e+06	1.30011e+06	1.30011e+06	138253086	1.30011e+06	1.30011e+06		1.30011e+06	1.30011e+06	3.55384e+07	0	0	5.93024e+07		1	#DIV/0!	27.3349	0.355918	27.3349	0.355918
P51658	Estradiol 17-beta-dehydrogenase 2 OS=Mus musculus GN=Hsd17b2 PE=1 SV=2 - [DHB2_MOUSE]	381	41.8087	8.57275	866739	866739	866739	866739	866739	866739	866739	866739	5.35977e+07	866739	866739	866739		866739	866739	1.40495e+07	0	0	2.28332e+07		1	#DIV/0!	16.2096	0.355918	16.2096	0.355918
Ratios above 1.5 are shown in bold.
Ratios below 0.67 are shown in italics.
P-values ​​below 0.05 are shown in bold.

## Sheet: Suppl Table 2
Supplementary Table 2. Comparison of metabolites of livers of DKO with WT mice.
Name	Formula	Molecular Weight	RT [min]	WT (n=4)				DKO (n=4)				DKO + Asc (n=4)					Average (n=4 each)			Standard deviation				WT vs DKO		WT vs DKO + Asc		DKO vs DKO + Asc
																								Ratio	T-test	Ratio	T-test	Ratio	T-test
				W41	W42	W44	W45	M48	M49	M50	M51	A36	A37	A38	A39		WT	DKO	DKO + Asc	WT	DKO	DKO + Asc		DKO/WT	P-value	DKO + Asc /WT	P-value	DKO + Asc /DKO	P-value
D-(+)-Glucose	C6 H12 O6	180.063	15.367	5.01617e+08	6.9605e+08	8.42929e+08	5.81202e+08	3.96662e+08	4.66284e+08	5.1711e+08	3.41916e+08	3.43659e+08	3.4804e+08	5.34543e+08	4.27374e+08		6.5545e+08	4.30493e+08	4.13404e+08	1.48295e+08	7.6972e+07	8.94552e+07		0.65679	0.0359194	0.630718	0.0313617	0.960303	0.781856
D-Glucose 6-phosphate	C6 H13 O9 P	260.029	16.206	652357	487649	1.92788e+06	1.26775e+06	1.84537e+06	1.95269e+06	2.38157e+06	1.34994e+06	1.62568e+06	1.24103e+06	100137	86725.3		1.08391e+06	1.88239e+06	763393	655195	423871	789401		1.73667	0.0866646	0.704297	0.555068	0.405545	0.0466699
3-Phosphoglyceric acid	C3 H7 O7 P	185.993	17.06	335463	16539.2	128335	13083.1	598749	521147	657120	382166	524920	498732	648857	158663		123355	539795	457793	151200	118933	209894		4.37595	0.00493104	3.71118	0.0414508	0.848086	0.521969
Phosphoenolpyruvic acid	C3 H5 O6 P	167.982	17.327	11326.6	65629.9	198201	106669	323736	380783	413164	41198.9	95497.6	384359	150520	907371		95456.8	289721	384437	78845.2	169755	370434		3.03509	0.08322	4.02734	0.177849	1.32692	0.658402
Pyruvic acid	C3 H4 O3	88.0159	11.906	141323	286471	637094	161118	235173	789561	587709	401005	510117	388138	322639	766822		306502	503362	496929	229574	239044	195984		1.64228	0.279744	1.62129	0.253876	0.98722	0.968151
Lactate	C3 H6 O3	90.0316	9.31	1.66971e+08	1.77963e+08	2.89624e+08	2.19775e+08	1.0319e+08	1.26152e+08	2.40969e+08	1.10026e+08	7.25213e+07	8.83305e+07	1.70353e+08	1.51469e+08		2.13583e+08	1.45084e+08	1.20668e+08	5.5564e+07	6.4644e+07	4.75432e+07		0.679287	0.159142	0.564971	0.0440122	0.831712	0.565142
Citric acid/Isocitrate	C6 H8 O7	192.027	12.308	4.54064e+06	1.93833e+06	3.74006e+06	1.85949e+06	3.92411e+06	3.93263e+06	2.66398e+06	2.31257e+06	3.63468e+06	1.6677e+06	6.95345e+06	3.80967e+06		3.01963e+06	3.20832e+06	4.01638e+06	1.33512e+06	843731	2.18564e+06		1.06249	0.819102	1.33009	0.465939	1.25186	0.516095
Itaconic acid	C5 H6 O4	130.027	9.388	1.08316e+06	2.39263e+06	9.40704e+06	4.94784e+06	1.73975e+06	989583	976356	1.13453e+06	3.93309e+06	836980	1.08565e+06	2.78149e+06		4.45767e+06	1.21005e+06	2.1593e+06	3.66916e+06	360327	1.46455e+06		0.271455	0.128584	0.484402	0.288786	1.78447	0.254874
2-Oxoglutaric acid	C5 H6 O5	146.021	12.396	3.05214e+06	465355	1.1125e+06	856443	1.08139e+06	1.20976e+06	1.03013e+06	1.682e+06	1.71594e+06	1.67631e+06	1.49808e+06	2.60937e+06		1.37161e+06	1.25082e+06	1.87493e+06	1.15152e+06	297217	498712		0.911937	0.845746	1.36695	0.453045	1.49895	0.0751067
Succinic acid	C4 H6 O4	118.027	15.786	1.58567e+08	8.4213e+07	1.85742e+08	8.78262e+07	9.45043e+07	7.47523e+07	8.81054e+07	1.24338e+08	5.9207e+07	6.14848e+07	9.00193e+07	7.79727e+07		1.29087e+08	9.54251e+07	7.2171e+07	5.09739e+07	2.09584e+07	1.45428e+07		0.73923	0.267697	0.559087	0.0753698	0.75631	0.118103
Fumaric acid	C4 H4 O4	116.011	10.736	4.6887e+06	3.00583e+06	2.59283e+06	2.22974e+06	3.28915e+06	2.15032e+06	2.19697e+06	2.67181e+06	2.03601e+06	2.17388e+06	5.83345e+06	9.31912e+06		3.12927e+06	2.57706e+06	4.84061e+06	1.08689e+06	529975	3.46506e+06		0.823534	0.396281	1.54688	0.382325	1.87835	0.244055
L-(-)-Malic acid	C4 H6 O5	134.021	10.2	1.14477e+07	1.04789e+07	2.12301e+07	1.83157e+07	2.95633e+07	1.67743e+07	2.47006e+07	2.48596e+07	1.64498e+07	2.7538e+07	3.03941e+07	3.42768e+07		1.53681e+07	2.39745e+07	2.71647e+07	5.2385e+06	5.30372e+06	7.65852e+06		1.56002	0.0603506	1.76761	0.0439193	1.13307	0.518966
Oxalicacid;Ethanedioicacid	C2 H2 O4	89.9952	17.044	2.1188e+06	1.13522e+06	534503	745922	919297	827822	924660	383486	1.08649e+06	760687	724660	1.01777e+06		1.13361e+06	763816	897402	702339	257418	181452		0.67379	0.360979	0.79163	0.539009	1.17489	0.428801
D-Ribose-5-phosphate	C5 H11 O8 P	230.018	9.987	4.096e+06	2.39927e+06	2.56311e+06	2.16476e+06	2.54869e+06	1.64501e+06	2.51361e+06	1.88528e+06	1.47295e+06	1.72684e+06	5.42844e+06	4.24981e+06		2.80579e+06	2.14815e+06	3.21951e+06	875541	453226	1.93386e+06		0.765613	0.230573	1.14745	0.710154	1.49874	0.322134
D-Sedoheptulose 7-phosphate	C7 H15 O10 P	290.04	16.154	339875	388582	659995	378567	667967	1.08792e+06	867210	686279	338494	574129	27248.5	50138.9		441755	827345	247502	147002	195612	259762		1.87286	0.0197732	0.560271	0.240777	0.299153	0.0118366
UDP-glucose	C15 H24 N2 O17 P2	566.054	16.104	11737.5	15467.3	106521	10156.4	118315	129669	124441	476776	101827	176909	13641.1	25505.5		35970.6	212300	79470.5	47086.3	176379	75806.2		5.90205	0.101592	2.20932	0.367259	0.374331	0.215701
UDP-N-acetylglucosamine	C17 H27 N3 O17 P2	607.08	15.57	432629	706443	697561	473005	791178	542212	886007	1.73908e+06	791316	797773	53247	97929.8		577409	989619	435067	144854	520249	415499		1.71389	0.177715	0.75348	0.541592	0.43963	0.146804
D-Glucosamine	C6 H13 N O5	197.089	14.123	612926	959139	1.90439e+06	316424	489693	260161	691195	364523	194737	210344	253325	340479		948220	451393	249721	689437	185372	65380.1		0.476043	0.213381	0.263358	0.0902451	0.553223	0.0860061
4-Hydroxy-2-oxoglutarate	C5 H6 O6	162.016	13.19	1.2965e+06	292303	859556	628381	226329	339799	93274.6	27090.9	85889.3	39625.3	18404.1	32267.4		769184	171623	44046.5	421689	139408	29249.8		0.223124	0.0360099	0.057264	0.0139548	0.256646	0.123437
D-α-Hydroxyglutaric acid	C5 H8 O5	148.037	15.709	837998	382105	1.23477e+06	622947	2.79375e+06	872368	1.72563e+06	1.38814e+06	1.53717e+06	2.06983e+06	35976.2	63050		769455	1.69497e+06	926506	361811	812214	1.03581e+06		2.20282	0.0825305	1.20411	0.78429	0.546621	0.287252
2,3-Dimethylmaleate	C6 H8 O4	144.042	12.902	1.27284e+07	1.5689e+07	1.71192e+07	1.43282e+07	1.00296e+07	9.94154e+06	1.04011e+07	3.01073e+06	7.80115e+06	7.23304e+06	1.07102e+07	9.88885e+06		1.49662e+07	8.34575e+06	8.90831e+06	1.87729e+06	3.56225e+06	1.65737e+06		0.557639	0.0166484	0.595228	0.00288618	1.06741	0.784224
D-(-)-Erythrose;L-Threose	C4 H8 O4	120.042	11.827	2.44107e+08	2.74417e+08	1.2326e+08	9.60123e+07	7.30764e+07	6.00564e+07	6.92979e+07	6.76436e+07	4.22693e+07	5.78718e+07	7.97376e+07	7.48395e+07		1.84449e+08	6.75185e+07	6.36795e+07	8.79745e+07	5.46978e+06	1.70737e+07		0.366055	0.0378686	0.345242	0.0358008	0.943141	0.683409
L-Threonic acid	C4 H8 O5	90.0316	10.403	1.87169e+07	2.54256e+07	3.33491e+07	4.87403e+07	1.36871e+07	2.78176e+07	3.53819e+07	2.1187e+07	3.42662e+07	2.64611e+07	1.59903e+07	1.48754e+07		3.1558e+07	2.45184e+07	2.28983e+07	1.29221e+07	9.2613e+06	9.20165e+06		0.776932	0.409927	0.725593	0.316818	0.933921	0.812259
Glycolaldehyde	C2 H4 O2	60.021	10.775	2.14632e+06	4.49216e+06	5.31667e+06	8.94934e+06	7.52242e+06	2.71714e+06	5.30021e+06	4.29006e+06	3.5643e+06	6.35387e+06	1.48034e+07	2.05108e+07		5.22612e+06	4.95746e+06	1.13081e+07	2.8222e+06	2.01337e+06	7.7764e+06		0.948592	0.881909	2.16376	0.191861	2.28103	0.164922
Methylglyoxal	C3 H4 O2	72.021	10.731	4.71337e+07	6.17536e+07	4.32619e+07	3.98824e+07	2.15179e+07	2.19745e+07	2.52913e+07	1.83244e+07	1.76003e+07	1.78755e+07	2.7429e+07	2.75993e+07		4.80079e+07	2.1777e+07	2.2626e+07	9.63079e+06	2.85055e+06	5.64585e+06		0.453613	0.00196989	0.471298	0.00390328	1.03899	0.797326
Gluconic acid	C6 H12 O7	196.058	14.459	9.86361e+07	4.26753e+07	7.3059e+07	5.39218e+07	6.3511e+07	8.38179e+07	8.77049e+07	1.74907e+07	6.878e+07	5.77011e+07	7.87849e+07	8.06861e+07		6.70731e+07	6.31311e+07	7.1488e+07	2.44967e+07	3.22232e+07	1.05714e+07		0.941229	0.851999	1.06582	0.751933	1.13237	0.639639
(2R,3S)-2,3-Dimethylmalate	C6 H10 O5	162.053	14.533	2.83623e+07	3.81852e+07	4.79528e+07	3.52997e+07	1.93892e+07	2.03434e+07	2.26995e+07	1.86313e+07	1.5742e+07	1.16052e+07	2.30318e+07	1.89958e+07		3.745e+07	2.02659e+07	1.73437e+07	8.12525e+06	1.7672e+06	4.85042e+06		0.541145	0.00612517	0.463117	0.00538309	0.855809	0.300794
D-Saccharic acid	C6 H10 O8	210.037	11.051	120556	110228	102427	84644.3	62371.9	83593.3	86239.2	67674.5	65884.5	67555.5	535238	1.64695e+06		104464	74969.7	578906	15156.4	11737.3	745495		0.717661	0.0217421	5.54169	0.250261	7.72187	0.225177
D-Arabinonate	C5 H10 O6	166.048	13.241	2.29957e+06	4.07395e+06	6.84579e+06	3.85735e+06	4.19453e+06	2.51887e+06	4.58611e+06	4.62808e+06	8.43748e+06	4.48938e+06	268107	345392		4.26916e+06	3.9819e+06	3.38509e+06	1.89086e+06	994702	3.90305e+06		0.932711	0.797008	0.792916	0.697646	0.850119	0.776957
D-(-)-Mannitol	C6 H14 O6	182.078	14	723905	678403	467115	339670	271830	363236	347816	142483	365320	359227	477666	217920		552273	281341	355033	180571	100826	106399		0.509424	0.0395833	0.642858	0.108827	1.26193	0.353487
β-D-Glucopyranuronic acid	C6 H10 O7	194.042	11.047	59712.8	71339.4	85560.3	54875.4	116295	88241.2	121069	150406	185159	63032.6	559429	455763		67872	119003	315846	13667.2	25456.1	230870		1.75334	0.012229	4.65356	0.0756878	2.65411	0.141018
D-(-)-Lyxose	C5 H10 O5	150.053	12.495	1.32298e+07	1.73549e+07	2.44641e+07	1.35482e+07	1.0554e+07	1.22346e+07	1.23029e+07	9.81341e+06	7.70658e+06	8.77786e+06	1.29413e+07	1.13659e+07		1.71493e+07	1.12263e+07	1.01979e+07	5.22424e+06	1.24152e+06	2.38841e+06		0.65462	0.0695185	0.594656	0.0518452	0.908398	0.473802
trans-Aconitic acid	C6 H6 O6	174.016	9.987	339712	1.16157e+06	5.00336e+06	2.21516e+06	872590	496863	372723	488923	824499	421770	560406	1.02928e+06		2.17995e+06	557775	708988	2.03277e+06	217412	271107		0.255866	0.163616	0.325231	0.201416	1.2711	0.417616
α-Lactose	C12 H22 O11	342.116	14.762	8.70324e+07	1.05853e+08	2.00397e+08	1.01936e+08	7.19204e+07	5.2861e+07	8.87568e+07	6.65081e+07	5.02374e+07	6.52122e+07	1.16993e+08	5.55819e+07		1.23805e+08	7.00116e+07	7.2006e+07	5.17013e+07	1.48486e+07	3.06244e+07		0.565501	0.0924182	0.58161	0.135471	1.02849	0.910525
D-Raffinose	C18 H32 O16	504.167	14.852	4.33982e+06	1.75175e+07	3.95365e+07	3.91493e+07	2.85159e+07	2.01014e+07	1.86052e+07	1.69685e+07	1.97398e+07	1.29387e+07	2.9321e+07	1.55376e+07		2.51358e+07	2.10478e+07	1.93843e+07	1.72653e+07	5.14055e+06	7.19277e+06		0.837363	0.665882	0.771184	0.561132	0.920967	0.719632
1,5-Anhydro-D-glucitol	C6 H12 O5	164.068	12.769	209590	253748	639038	355205	44850.3	33869.5	75141.5	19583.7	82928.3	59587.8	31602.2	46831.8		364395	43361.2	55237.5	192977	23577.3	21717.8		0.118995	0.0163546	0.151587	0.0189801	1.27389	0.486681
L-Cysteine	C3 H7 N O2 S	121.02	9.247	53083.3	38901.5	20606.7	35943.1	45895.3	50252.7	43443.4	71475.6	62066.5	53889.5	37063.8	266624		37133.7	52766.8	104911	13317.6	12786.5	108310		1.421	0.141296	2.82522	0.260516	1.9882	0.375881
S-Adenosylhomocysteine	C14 H20 N6 O5 S	384.12	13.701	1.87573e+06	1.5504e+06	1.84083e+06	1.40362e+06	1.95832e+06	2.24011e+06	2.55357e+06	1.92522e+06	1.91639e+06	2.42164e+06	2.07112e+06	1.8413e+06		1.66765e+06	2.1693e+06	2.06261e+06	228584	292553	257771		1.30082	0.0354611	1.23684	0.0617039	0.950817	0.603943
L-Cystine	C6 H12 N2 O4 S2	240.024	7.725	46455.4	45522.6	51220.8	33929.3	30498.1	43551.6	52178	67653.2	115029	37599.1	24481.2	47510		44282	48470.2	56154.8	7339.12	15587.6	40366.8		1.09458	0.644083	1.26812	0.583809	1.15854	0.734609
S-Adenosylmethionine	C15 H22 N6 O5 S	398.136	15.298	109424	113109	61388.5	86218	96671.8	104571	107309	188516	86546	126294	81419	48488.4		92534.7	124267	85686.8	23934	43069.5	31893.6		1.34292	0.245177	0.925996	0.742963	0.689537	0.199999
L-Valine	C5 H11 N O2	117.079	8.034	3.85922e+08	3.1142e+08	2.43012e+08	2.76105e+08	2.59554e+08	1.9678e+08	3.48072e+08	3.5694e+08	3.10534e+08	4.01573e+08	4.17557e+08	4.22783e+08		3.04115e+08	2.90336e+08	3.88112e+08	6.12753e+07	7.63106e+07	5.24997e+07		0.954693	0.787729	1.2762	0.0825108	1.33676	0.0792427
L-Citrulline	C6 H13 N3 O3	175.095	16.187	6.38856e+06	2.95582e+06	3.80067e+06	3.11097e+06	6.1245e+06	4.71092e+06	5.13482e+06	3.48663e+06	3.74023e+06	3.19788e+06	4.40417e+06	5.29603e+06		4.06401e+06	4.86421e+06	4.15958e+06	1.59261e+06	1.09282e+06	904074		1.1969	0.439048	1.02352	0.920276	0.855139	0.358771
L-Histidine	C6 H9 N3 O2	155.069	7.367	2.48803e+07	4.83198e+07	5.00873e+07	5.05232e+07	4.39576e+07	4.80858e+07	4.42552e+07	5.73453e+07	4.01833e+07	3.7061e+07	5.50518e+07	4.18615e+07		4.34527e+07	4.8411e+07	4.35394e+07	1.24182e+07	6.24581e+06	7.92851e+06		1.11411	0.502386	1.002	0.99099	0.89937	0.37166
Glycine	C2 H5 N O2	75.0319	8.452	9.35654e+06	1.45262e+07	9.9458e+06	8.09949e+06	9.80694e+06	1.01801e+07	1.10821e+07	9.25982e+06	1.14642e+07	7.81105e+06	1.09791e+07	1.26792e+07		1.0482e+07	1.00822e+07	1.07334e+07	2.80394e+06	766261	2.07531e+06		0.961861	0.792491	1.02398	0.890118	1.06459	0.577542
L-Asparagine	C4 H8 N2 O3	132.053	8.372	7.71283e+06	9.20004e+06	7.75666e+06	6.02764e+06	9.12768e+06	7.40147e+06	7.94501e+06	7.72052e+06	6.1408e+06	7.87348e+06	7.68071e+06	6.50914e+06		7.67429e+06	8.04867e+06	7.05103e+06	1.29713e+06	753120	855394		1.04878	0.635412	0.918786	0.453003	0.876049	0.13056
L-Tryptophan	C11 H12 N2 O2	204.089	12.504	1.95382e+06	3.74931e+06	2.68122e+06	2.46692e+06	2.46548e+06	2.5931e+06	2.98637e+06	3.31836e+06	2.64141e+06	1.94758e+06	2.93328e+06	2.34844e+06		2.71282e+06	2.84083e+06	2.46768e+06	755394	387933	420985		1.04719	0.773221	0.909636	0.591315	0.868648	0.240137
L-Glutamic acid	C5 H9 N O4	147.053	9.45	1.04577e+08	8.18518e+07	1.42468e+08	9.69847e+07	1.31062e+08	6.72637e+07	1.02698e+08	1.00187e+08	9.9744e+07	1.14471e+08	8.44952e+07	1.12208e+08		1.0647e+08	1.00303e+08	1.0273e+08	2.57906e+07	2.6099e+07	1.37734e+07		0.942072	0.74818	0.964867	0.806595	1.0242	0.874752
L-Proline	C5 H9 N O2	115.063	8.799	3.85561e+07	7.01255e+07	5.23028e+07	4.34387e+07	5.61378e+07	4.59221e+07	5.68151e+07	4.11032e+07	4.82349e+07	5.16956e+07	4.07457e+07	2.93851e+07		5.11058e+07	4.99946e+07	4.25153e+07	1.3898e+07	7.7438e+06	9.87465e+06		0.978256	0.893476	0.831908	0.352472	0.850399	0.278258
L-Alanine	C3 H7 N O2	89.0476	6.91	4.0753e+07	5.26603e+07	4.59445e+07	5.17619e+07	4.61591e+07	3.92423e+07	4.09852e+07	3.38484e+07	4.73761e+07	3.36016e+07	4.17041e+07	4.39935e+07		4.77799e+07	4.00588e+07	4.16688e+07	5.55039e+06	5.07633e+06	5.86112e+06		0.838402	0.0858808	0.872099	0.180766	1.04019	0.692373
L-Aspartic acid	C4 H7 N O4	133.037	11.18	2.59753e+07	1.80246e+07	1.32586e+07	1.84623e+07	1.73611e+07	8.42115e+06	1.55511e+07	2.35499e+07	1.22741e+07	2.7169e+07	7.00652e+06	1.24797e+07		1.89302e+07	1.62208e+07	1.47323e+07	5.25482e+06	6.22625e+06	8.66941e+06		0.856875	0.530708	0.778245	0.439266	0.908237	0.789679
L-Methionine	C5 H11 N O2 S	149.051	7.229	3.07685e+06	3.94594e+06	2.59016e+06	3.06726e+06	2.47639e+06	2.10461e+06	2.53644e+06	2.12275e+06	3.0506e+06	3.11923e+06	2.31896e+06	2.40544e+06		3.17005e+06	2.31005e+06	2.72356e+06	564956	228187	419688		0.72871	0.0302378	0.859153	0.251501	1.179	0.13413
L-Tyrosine	C9 H11 N O3	181.074	7.254	6.43085e+06	5.39933e+06	4.71587e+06	4.19555e+06	4.13199e+06	3.40722e+06	4.29421e+06	3.8566e+06	4.60679e+06	4.88271e+06	3.05278e+06	3.87138e+06		5.1854e+06	3.9225e+06	4.10342e+06	965602	388121	820237		0.756452	0.0513684	0.79134	0.1385	1.04612	0.703892
L-Serine	C3 H7 N O3	105.043	8.886	5.65254e+07	3.7586e+07	6.89014e+07	2.96146e+07	4.48427e+07	4.35599e+07	2.64328e+07	1.79026e+07	4.35037e+07	3.24585e+07	2.14951e+07	5.75735e+07		4.81568e+07	3.31845e+07	3.87577e+07	1.78505e+07	1.31996e+07	1.54298e+07		0.689092	0.226075	0.804822	0.455979	1.16795	0.602862
L-Cysteicacid	C3 H7 N O5 S	169.004	15.169	1.37066e+06	1.96894e+06	1.69144e+06	1.64254e+06	648747	1.18619e+06	1.52877e+06	1.81345e+06	1.42761e+06	2.65543e+06	94850.9	148097		1.66839e+06	1.29429e+06	1.0815e+06	245068	500972	1.21679e+06		0.77577	0.228272	0.648226	0.380825	0.835591	0.757353
L-Arginine	C6 H14 N4 O2	174.111	10.319	257964	286688	139913	159976	152107	126427	137782	97545.3	189100	142280	110933	141318		211136	128465	145908	72090.4	23136.8	32264.7		0.60845	0.0716849	0.691061	0.149679	1.13577	0.413397
L-Glutamine	C5 H10 N2 O3	146.069	13.85	2.10555e+08	2.87367e+08	3.35131e+08	2.82398e+08	2.02033e+08	1.3095e+08	2.26974e+08	1.86973e+08	1.48279e+08	1.5803e+08	1.81363e+08	2.12952e+08		2.78863e+08	1.86733e+08	1.75156e+08	5.13706e+07	4.06825e+07	2.8768e+07		0.669622	0.0306793	0.628109	0.012476	0.938004	0.658546
L-Phenylalanine	C9 H11 N O2	165.079	6.76	1.41401e+07	2.27882e+07	1.40564e+07	1.37585e+07	1.03549e+07	1.12704e+07	1.1212e+07	9.17538e+06	1.20405e+07	9.26381e+06	9.47572e+06	8.99124e+06		1.61858e+07	1.05032e+07	9.94283e+06	4.40467e+06	979116	1.41247e+06		0.648912	0.0453607	0.614293	0.0356085	0.946651	0.538519
L-Ornithine	C5 H12 N2 O2	132.09	9.997	5.19186e+06	1.27502e+07	7.98765e+06	7.56808e+06	6.00492e+06	4.72442e+06	4.19441e+06	5.48477e+06	6.76274e+06	7.23761e+06	3.39089e+06	4.42023e+06		8.37446e+06	5.10213e+06	5.45287e+06	3.16629e+06	801677	1.84564e+06		0.609249	0.091947	0.651131	0.161968	1.06874	0.73929
L-Lysine	C6 H14 N2 O2	146.105	10.168	2.25731e+07	2.10793e+07	1.11012e+07	1.19897e+07	1.23726e+07	9.83355e+06	1.14298e+07	8.57222e+06	1.0883e+07	1.09494e+07	1.06087e+07	6.69675e+06		1.66858e+07	1.05521e+07	9.78447e+06	5.97785e+06	1.68532e+06	2.06376e+06		0.632397	0.0956624	0.586395	0.0718068	0.927258	0.585455
L-Leucine/L-Isoleucine	C6 H13 N O2	131.095	6.758	7.01376e+07	9.26981e+07	4.85524e+07	4.42854e+07	4.16354e+07	3.94811e+07	4.83019e+07	3.41314e+07	4.11229e+07	2.90535e+07	3.5577e+07	3.70439e+07		6.39184e+07	4.08874e+07	3.56993e+07	2.22749e+07	5.86388e+06	5.01348e+06		0.639682	0.0924583	0.558514	0.048335	0.873113	0.227248
L-Threonine	C4 H9 N O3	119.058	7.221	2.33562e+07	3.44398e+07	2.7264e+07	2.45633e+07	1.48028e+07	1.64065e+07	1.81157e+07	1.22089e+07	1.94693e+07	1.09788e+07	1.78461e+07	1.8868e+07		2.74058e+07	1.53835e+07	1.67906e+07	4.96575e+06	2.51176e+06	3.93204e+06		0.561321	0.0049783	0.612664	0.0153844	1.09147	0.568492
5-Oxoproline	C5 H7 N O3	129.043	10.464	1.30483e+08	2.51714e+08	2.6838e+08	2.09284e+08	2.02617e+08	1.13141e+08	1.90426e+08	1.8073e+08	1.46546e+08	1.63188e+08	1.3912e+08	1.91982e+08		2.14965e+08	1.71729e+08	1.60209e+08	6.15718e+07	4.00719e+07	2.34509e+07		0.798867	0.283731	0.745279	0.147548	0.932921	0.637396
cis-4-Hydroxy-L-proline	C5 H9 N O3	131.058	8.593	1.75385e+06	3.77855e+06	2.98442e+06	3.87074e+06	5.84028e+06	6.07785e+06	4.62056e+06	2.86319e+06	3.97744e+06	3.93633e+06	4.32481e+06	4.69548e+06		3.09689e+06	4.85047e+06	4.23352e+06	979782	1.47064e+06	353855		1.56624	0.0944121	1.36702	0.0718431	0.872805	0.445812
(S)-1-Pyrroline-5-carboxylate	C5 H7 N O2	113.047	9.334	1.05043e+06	202127	2.23123e+06	2.04505e+06	4.34979e+06	9.63812e+06	3.65808e+06	4.36812e+06	4.25987e+06	5.60389e+06	1.70324e+07	7.59622e+06		1.38221e+06	5.50353e+06	8.62309e+06	942138	2.77614e+06	5.7713e+06		3.98169	0.0306913	6.23863	0.0480332	1.56683	0.367576
N,N-Dihydroxy-L-tyrosine	C9 H11 N O5	213.063	11.284	14041.9	11068	10538.5	7851.09	8472.81	9064.15	8452.77	6577.76	6207.56	6534.83	12032.2	19050.3		10874.9	8141.87	10956.2	2537.96	1080.62	6021.35		0.748687	0.0948193	1.00748	0.980942	1.34566	0.393014
formyl-isoglutamine	C6 H10 N2 O4	174.064	13.131	1.00934e+07	1.61775e+06	1.06045e+06	912222	2.12517e+06	4.31334e+06	860371	843308	5.18793e+06	1.53745e+06	1.04634e+06	3.49456e+06		3.42096e+06	2.03555e+06	2.81657e+06	4.45866e+06	1.63288e+06	1.90201e+06		0.595022	0.580784	0.823327	0.811394	1.38369	0.556129
N-Acetyl-L-glutamic acid	C7 H11 N O5	189.063	14.945	5.56428e+06	2.96393e+06	5.15266e+06	3.00071e+06	1.05845e+07	7.69312e+06	8.43891e+06	6.75834e+06	9.20627e+06	1.00176e+07	2.11044e+06	3.87461e+06		4.1704e+06	8.3687e+06	6.30224e+06	1.38221e+06	1.62933e+06	3.90309e+06		2.00669	0.00771424	1.51119	0.342847	0.753073	0.366226
4-Methylene-L-glutamate	C6 H9 N O4	159.053	8.94	117865	151855	147299	218367	190752	223851	227313	259542	247186	114275	334480	1.47767e+06		158846	225364	543403	42443.7	28120.3	629391		1.41876	0.0399611	3.42093	0.26851	2.41122	0.351647
2-Aminoadipic acid	C6 H11 N O4	161.069	9.195	9.88682e+07	1.62143e+08	2.13172e+08	1.78854e+08	1.17179e+08	2.36292e+08	2.18944e+08	1.66728e+08	1.79516e+08	2.66511e+08	4.11639e+08	3.23675e+08		1.63259e+08	1.84786e+08	2.95335e+08	4.78954e+07	5.39028e+07	9.75957e+07		1.13185	0.572289	1.80899	0.0511786	1.59826	0.0946177
L-2-Methyltryptophan	C12 H14 N2 O2	218.105	5.967	35747.4	49333.9	45986.8	39086.7	41647.8	39398.5	42435.6	43010.6	38409	38801.4	40900.2	44545		42538.7	41623.1	40663.9	6220.98	1584.79	2809.03		0.978477	0.785051	0.955927	0.602604	0.976954	0.573683
Tauropine	C5 H11 N O5 S	197.035	6.035	1.25446e+07	7.76621e+06	1.56048e+07	1.03055e+07	1.28784e+07	9.49218e+06	456107	510238	497716	7.24739e+06	635146	633681		1.15553e+07	5.83422e+06	2.25348e+06	3.3315e+06	6.33165e+06	3.3299e+06		0.504897	0.16088	0.195018	0.00754165	0.386253	0.355444
Taurine	C2 H7 N O3 S	125.015	14.996	4.7857e+08	3.98628e+08	4.24483e+08	3.30839e+08	4.91345e+08	3.41904e+08	3.62839e+08	3.93639e+08	2.73758e+08	3.6582e+08	4.78108e+08	3.17245e+08		4.0813e+08	3.97432e+08	3.58733e+08	6.13551e+07	6.61165e+07	8.80202e+07		0.973787	0.820379	0.878967	0.39268	0.902628	0.508363
Putrescine	C4 H12 N2	88.0999	5.629	33376.7	21227.8	22489.9	23430.4	31945.3	25806.3	63043.8	245492	42979.9	517727	88910.6	48148.3		25131.2	91571.9	174441	5570.59	103900	229777		3.64375	0.24876	6.94123	0.241553	1.90497	0.535412
Spermidine	C7 H19 N3	145.158	7.636	1.33407e+07	1.05686e+06	905718	323795	1.61698e+06	791732	1.56364e+06	2.432e+06	1.36549e+06	1.26762e+06	978513	1.35409e+06		3.90676e+06	1.60109e+06	1.24143e+06	6.29721e+06	670105	180641		0.409825	0.493934	0.317764	0.42991	0.775365	0.339947
Spermine	C10 H26 N4	202.215	8.364	7.22774e+06	140303	15821.9	9882.68	9364.76	13184	8225.65	10415.9	7736.95	4819.73	6661.75	9556.99		1.84844e+06	10297.6	7193.86	3.5867e+06	2121.99	1983.18		0.00557097	0.344911	0.00389186	0.344159	0.698596	0.076443
Urea	C H4 N2 O	60.0322	11.459	2.7169e+07	2.89267e+07	2.58759e+07	1.82674e+07	2.71945e+07	1.79926e+07	2.10629e+07	2.01758e+07	2.6369e+07	2.45596e+07	2.97765e+07	2.41858e+07		2.50597e+07	2.16064e+07	2.62227e+07	4.69769e+06	3.94246e+06	2.55383e+06		0.862197	0.30311	1.04641	0.678768	1.21365	0.0969542
Gamma-Glutamylcysteine	C8 H14 N2 O5 S	250.062	8.4	6.83134e+07	9.81228e+07	1.04799e+08	7.04243e+07	1.24548e+08	1.02674e+08	1.13796e+08	1.30202e+08	1.1792e+08	1.11205e+08	1.54008e+08	9.0614e+07		8.54148e+07	1.17805e+08	1.18437e+08	1.87475e+07	1.2168e+07	2.6407e+07		1.37921	0.027391	1.3866	0.0875274	1.00536	0.966747
L-Glutathione (reduced)	C10 H17 N3 O6 S	307.084	7.643	6.10726e+06	1.52252e+07	2.46828e+07	2.03949e+07	1.80173e+07	3.62421e+07	3.11285e+07	2.96545e+07	2.91114e+07	1.66186e+07	1.31952e+07	1.5531e+07		1.66025e+07	2.87606e+07	1.8614e+07	7.99418e+06	7.69843e+06	7.14247e+06		1.7323	0.0709798	1.12116	0.720364	0.647207	0.101505
L-Ala-L-Ala	C6 H12 N2 O3	160.085	12.548	1.60207e+08	7.90439e+07	4.7636e+07	6.04376e+07	6.2277e+07	6.78272e+07	7.04532e+07	6.79902e+07	5.40195e+07	5.88384e+07	5.02784e+07	5.85752e+07		8.68312e+07	6.71369e+07	5.54279e+07	5.05885e+07	3.4555e+06	4.08405e+06		0.773188	0.466788	0.638341	0.262133	0.825595	0.00468141
Ectoine	C6 H10 N2 O2	142.074	10.998	1.27906e+08	6.36974e+07	6.38468e+07	6.00123e+07	5.88083e+07	6.49537e+07	6.58964e+07	5.17636e+07	4.95762e+07	5.50491e+07	5.09768e+07	6.1764e+07		7.88655e+07	6.03555e+07	5.43415e+07	3.27415e+07	6.53349e+06	5.46576e+06		0.765296	0.309965	0.68904	0.189989	0.900358	0.207647
3-Methylcrotonylglycine	C7 H11 N O3	157.074	7.56	3.30882e+07	2.42965e+07	2.36846e+07	1.49223e+07	1.96881e+07	1.07695e+07	1.72866e+07	1.3494e+07	5.2005e+06	1.06997e+07	1.68811e+07	1.59029e+07		2.39979e+07	1.53096e+07	1.21711e+07	7.42042e+06	3.95762e+06	5.38097e+06		0.637954	0.0843261	0.507172	0.041738	0.794997	0.383633
Alliin	C6 H11 N O3 S	177.046	5.558	1.84568e+06	687371	400030	1.10853e+06	683078	1.41351e+06	1.26432e+06	1.39025e+06	1.27479e+06	984805	48833.7	41470.4		1.0104e+06	1.18779e+06	587474	628282	342798	637319		1.17556	0.637741	0.581426	0.381069	0.494595	0.148166
gamma-Glutamyl-gamma-aminobutyraye	C9 H16 N2 O5	232.105	12.96	1.45006e+07	1.96524e+07	1.60021e+07	1.38807e+07	1.48508e+07	1.16801e+07	1.5545e+07	1.19675e+07	1.42753e+07	1.2169e+07	1.26978e+07	1.50707e+07		1.6009e+07	1.35108e+07	1.35532e+07	2.5871e+06	1.97201e+06	1.35056e+06		0.843956	0.175473	0.846602	0.143378	1.00314	0.972869
Imidazole-4-acetaldehyde	C5 H6 N2 O	110.048	5.883	1.31855e+06	1.53506e+06	2.06251e+06	1.7012e+06	1.98259e+06	1.96502e+06	3.01078e+06	2.38377e+06	2.389e+06	2.90367e+06	1.3579e+06	1.06981e+06		1.65433e+06	2.33554e+06	1.93009e+06	313998	489946	861386		1.41177	0.0577485	1.16669	0.569486	0.826401	0.444474
Urocanic acid	C6 H6 N2 O2	138.043	13.317	2.02698e+07	4.13953e+06	3.22166e+06	2.63758e+06	2.03488e+06	3.08626e+06	2.66434e+06	2.97565e+06	3.87405e+06	2.91928e+06	4.44979e+06	3.23478e+06		7.56714e+06	2.69028e+06	3.61948e+06	8.49097e+06	472036	681297		0.355522	0.295074	0.478315	0.389754	1.34539	0.0661516
Ggamma-L-Glutamyl-L-glutamicacid	C10 H16 N2 O7	276.095	10.419	26184.4	27578.2	24966.4	20957.7	15825.9	20214.1	22561.6	17017.5	16212.3	18049.7	26648	64336.7		24921.7	18904.8	31311.7	2849.94	3062.03	22481.6		0.758569	0.0281767	1.2564	0.593224	1.65628	0.316065
Cysteinylglycine	C5 H10 N2 O3 S	178.04	2.686	41255.1	10342.5	19834.7	8129.29	7064.69	9796	8247.74	6536.9	5459.38	7302.8	9374.05	11023.3		19890.4	7911.33	8289.89	15121.1	1445.8	2424.41		0.397746	0.165817	0.416779	0.18055	1.04785	0.797515
Orthophosphate	H3 O4 P	97.9768	12.335	3.8376e+07	3.42141e+07	2.35663e+07	2.02621e+07	2.06596e+07	1.79716e+07	2.2678e+07	4.00206e+07	1.78551e+07	2.16744e+07	4.39184e+07	1.05893e+08		2.91046e+07	2.53325e+07	4.73353e+07	8.58154e+06	9.98004e+06	4.06951e+07		0.870392	0.587344	1.62638	0.414377	1.86856	0.334061
Adenine	C5 H5 N5	135.054	9.114	2.35143e+07	9.41615e+06	1.62536e+07	1.3842e+07	6.47174e+06	9.98957e+06	1.05718e+07	8.05157e+06	8.1128e+06	9.39535e+06	4.29801e+06	4.0313e+06		1.57565e+07	8.77117e+06	6.45937e+06	5.89619e+06	1.87367e+06	2.70313e+06		0.55667	0.0647111	0.409949	0.02855	0.736432	0.209404
Adenosine	C10 H13 N5 O4	267.096	8.809	1.02987e+08	6.17721e+07	6.4675e+07	9.254e+07	5.70596e+07	8.73346e+07	6.83614e+07	8.29528e+07	4.77506e+07	8.14e+07	5.9898e+07	4.85554e+07		8.04937e+07	7.39271e+07	5.9401e+07	2.04272e+07	1.3865e+07	1.56798e+07		0.918421	0.613865	0.737959	0.152496	0.803508	0.214476
Adenosine 5'-monophosphate	C10 H14 N5 O7 P	347.062	15.246	2.51762e+07	2.29769e+07	2.21277e+07	2.11468e+07	1.87185e+07	1.52391e+07	1.87293e+07	2.42088e+07	1.71012e+07	1.39291e+07	2.01756e+07	1.70614e+07		2.28569e+07	1.92239e+07	1.70668e+07	1.71752e+06	3.70712e+06	2.55024e+06		0.841055	0.125654	0.746682	0.00932921	0.887791	0.37469
Adenosine diphosphate (ADP)	C10 H15 N5 O10 P2	427.028	16.517	533080	24580.3	21868.5	26972.7	18687.7	25335.8	20668.9	32044.6	38909.8	16213.4	105427	290776		151625	24184.2	112831	254312	5935.25	124524		0.1595	0.355039	0.744146	0.793269	4.66549	0.204819
Adenosine diphosphate ribose	C15 H23 N5 O14 P2	559.071	14.743	114824	958524	113269	352022	40444.6	18138.3	28525.8	20272.1	16640.3	17888.9	70698.3	43642.2		384660	26845.2	37217.4	398685	10112.4	25555.5		0.0697894	0.122902	0.0967541	0.132625	1.38637	0.47894
Uracil;2,4-Dihydroxypyrimidine	C4 H4 N2 O2	112.027	10.315	1.20805e+07	2.24203e+07	1.54412e+07	1.56411e+07	1.31463e+07	1.42127e+07	1.54574e+07	1.12993e+07	1.29603e+07	1.60122e+07	1.21428e+07	1.23127e+07		1.63958e+07	1.35289e+07	1.3357e+07	4.33581e+06	1.76109e+06	1.80485e+06		0.825145	0.266407	0.814659	0.24321	0.987291	0.89599
Uridine	C9 H12 N2 O6	244.069	10.474	1.2913e+07	1.09648e+07	1.35064e+07	1.56853e+07	1.19632e+07	1.08383e+07	1.25182e+07	1.0941e+07	1.12227e+07	1.06876e+07	1.05022e+07	1.50173e+07		1.32674e+07	1.15652e+07	1.18575e+07	1.94347e+06	813357	2.12858e+06		0.871701	0.157244	0.893733	0.365711	1.02527	0.806096
Uridine monophosphate (UMP)	C9 H13 N2 O9 P	324.035	14.562	1.76605e+06	2.33785e+06	1.69048e+06	2.58485e+06	1.90797e+06	1.05295e+06	1.79077e+06	1.18999e+06	1.70449e+06	963149	38559.4	67387.9		2.09481e+06	1.48542e+06	693397	436186	426653	799120		0.709094	0.0927479	0.331007	0.021701	0.466803	0.130942
Uridine 5'-diphosphate (UDP)	C9 H14 N2 O12 P2	404.001	11.183	19403.9	18255.2	16609.3	12414.2	10862.8	13535.9	12154.8	8728.44	9550.98	8810.72	17735.7	34979.1		16670.7	11320.5	17769.1	3060.66	2043.88	12165.2		0.679064	0.0270707	1.06589	0.866739	1.56964	0.33606
Uridine 5'-diphosphoglucuronic acid	C15 H22 N2 O18 P2	580.033	11.078	109519	102980	95968.4	81276.1	61199.5	77363	82240.6	65642.5	64204.6	67134.2	109114	232520		97436	71611.4	118243	12111.2	9833.54	78898.4		0.734958	0.0161903	1.21355	0.620808	1.65118	0.285252
Guanosine	C10 H13 N5 O5	283.091	14.408	474401	513528	951622	540854	1.39314e+06	1.23253e+06	1.08043e+06	433780	633776	1.76518e+06	646811	535881		620101	1.03497e+06	895413	222690	420638	581957		1.66903	0.131901	1.44398	0.41088	0.865159	0.710914
Guanosine monophosphate (GMP)	C10 H14 N5 O8 P	363.057	16.062	971481	763831	697126	688739	873198	731309	592969	825897	743662	665374	706754	354616		780294	755843	617601	131811	123571	178216		0.968665	0.795725	0.791498	0.192503	0.817102	0.249484
5-Methylcytosine	C5 H7 N3 O	125.059	5.708	61665	125563	182467	257167	203185	157603	212870	123068	190032	669155	6525.48	12547.7		156716	174181	219565	83184.1	41735	311579		1.11145	0.720321	1.40104	0.710165	1.26055	0.7825
2',3'-CyclicCMP	C9 H12 N3 O7 P	305.041	12.916	6.7979e+06	1.62998e+07	9.23919e+06	1.88551e+07	4.9781e+06	1.58217e+06	6.13975e+06	1.02257e+07	9.71918e+06	1.35351e+07	3.89099e+06	2.35331e+06		1.2798e+07	5.73143e+06	7.37465e+06	5.70432e+06	3.56601e+06	5.18967e+06		0.447838	0.0803791	0.576234	0.209196	1.2867	0.620421
Hypoxanthine	C5 H4 N4 O	136.038	9.122	1.08489e+08	2.18973e+08	2.57645e+08	2.39673e+08	2.22368e+08	2.2175e+08	2.04547e+08	1.39642e+08	2.01352e+08	2.33838e+08	2.58116e+08	1.97268e+08		2.06195e+08	1.97077e+08	2.22644e+08	6.70266e+07	3.91703e+07	2.87566e+07		0.955779	0.822095	1.07977	0.667797	1.12973	0.33319
Xanthine	C5 H4 N4 O2	152.033	13.085	2.47667e+07	9.0058e+07	7.90284e+07	7.87971e+07	6.99725e+07	6.3429e+07	6.05563e+07	4.54475e+07	5.24984e+07	6.6123e+07	6.45113e+07	4.76084e+07		6.81625e+07	5.98513e+07	5.76853e+07	2.9404e+07	1.03796e+07	9.05973e+06		0.878068	0.613139	0.84629	0.521242	0.963809	0.763833
Xanthosine	C10 H12 N4 O6	284.075	13.307	3.79753e+06	4.73408e+06	4.90176e+06	3.36788e+06	1.92795e+06	2.05195e+06	2.14427e+06	1.51572e+06	1.71573e+06	1.75147e+06	1.60641e+06	873164		4.20031e+06	1.90997e+06	1.48669e+06	737592	277375	413647		0.454722	0.00113823	0.353948	0.000675632	0.778384	0.140078
Inosine	C10 H12 N4 O5	268.08	10.139	1.43739e+07	2.16912e+07	2.18746e+07	2.02509e+07	1.73042e+07	1.62774e+07	1.91592e+07	1.4156e+07	1.7309e+07	1.52317e+07	2.2763e+07	2.59627e+07		1.95476e+07	1.67242e+07	2.03166e+07	3.52475e+06	2.08652e+06	4.92497e+06		0.855562	0.217208	1.03934	0.808019	1.2148	0.22776
N-Ribosylnicotinamide	C11 H14 N2 O5	254.09	8.059	5.42283e+06	2.87317e+06	1.47676e+06	2.37597e+06	2.75069e+06	183126	1.35832e+06	238777	3.29797e+06	343330	1.34334e+06	122219		3.03718e+06	1.13273e+06	1.27671e+06	1.69217e+06	1.20687e+06	1.44844e+06		0.372953	0.116573	0.420362	0.165026	1.12712	0.883607
Pyrophosphate	H4 O7 P2	177.943	16.807	19913	24335.2	294893	17683.3	305689	363628	567082	729581	223214	586281	21534.1	75696		89206.3	491495	226681	137153	194313	254431		5.50965	0.0148058	2.54109	0.378211	0.461208	0.149142
Glycerol 3-phosphate	C3 H9 O6 P	172.013	15.6	4.21308e+07	3.00823e+07	3.39182e+07	3.83778e+07	3.1884e+07	2.68351e+07	3.21502e+07	2.88054e+07	3.01999e+07	4.247e+07	2.33824e+07	2.56412e+07		3.61273e+07	2.99187e+07	3.04234e+07	5.24493e+06	2.55539e+06	8.51694e+06		0.828146	0.0773899	0.842117	0.297545	1.01687	0.913319
(6Z)-Octadecenoicacid	C18 H34 O2	282.255	4.526	6.60217e+06	191861	177472	130725	337009	340735	335472	116264	293238	102658	272940	529709		1.77556e+06	282370	299636	3.21785e+06	110759	175583		0.159032	0.389445	0.168756	0.395005	1.06115	0.873352
2-Hydroxy-2,4-pentadienoate	C5 H6 O3	114.032	11.828	2.44004e+07	2.90682e+07	4.11791e+07	2.88329e+07	1.74295e+07	2.04486e+07	2.10104e+07	1.5181e+07	1.29865e+07	1.53287e+07	2.25081e+07	2.10955e+07		3.08701e+07	1.85174e+07	1.79797e+07	7.20023e+06	2.72393e+06	4.55246e+06		0.599848	0.0183848	0.58243	0.0232056	0.970963	0.846064
Hexadecanoicacid	C16 H32 O2	256.24	4.562	3.11278e+07	6.17745e+06	4.16589e+06	4.18272e+06	6.91438e+06	4.69663e+06	6.28066e+06	1.90444e+06	4.70634e+06	1.4537e+06	8.42922e+06	1.12418e+07		1.14135e+07	4.94903e+06	6.45777e+06	1.31768e+07	2.23376e+06	4.27715e+06		0.433613	0.370711	0.565803	0.501217	1.30486	0.554768
Myristicacid	C14 H28 O2	228.209	5.945	3.73119e+06	866108	891648	1.15084e+06	722790	2.12469e+06	1.79198e+06	557575	1.50811e+06	443113	2.64772e+06	5.41293e+06		1.65995e+06	1.29926e+06	2.50297e+06	1.38681e+06	775996	2.13866e+06		0.782709	0.665828	1.50786	0.532876	1.92646	0.330709
Arachidonic acid	C20 H32 O2	304.24	4.511	1.38848e+06	274583	243210	125885	283262	216401	168208	138954	325316	224726	170543	155016		508040	201706	218900	590441	63053.7	76980.5		0.397028	0.34196	0.430872	0.368963	1.08524	0.741451
Palmitoleicacid	C16 H30 O2	254.224	4.373	3.08204e+06	121664	100897	118248	915085	420713	89557.5	63577.9	107156	54081.6	50973.8	87123.5		855712	372234	74833.8	1.48425e+06	396742	27053.9		0.434999	0.552293	0.0874521	0.333291	0.20104	0.185354
Octadecanoicacid	C18 H36 O2	284.271	4.305	4.72064e+06	454695	766693	759792	264238	656345	266925	162268	243226	236260	1.19696e+06	1.1476e+06		1.67545e+06	337444	706012	2.03533e+06	218110	538785		0.201405	0.238971	0.421385	0.392626	2.09223	0.251721
Glycerophosphoglycerol	C6 H15 O8 P	246.05	14.326	704138	1.02206e+06	1.36714e+06	759937	818704	2.4129e+06	946610	1.11836e+06	1.80052e+06	490699	57728	73434.8		963318	1.32414e+06	605595	302796	736145	821461		1.37457	0.399556	0.628656	0.445047	0.457349	0.240393
[FAmethyl(14:0)]12-methyl-tetradecanoicacid	C15 H30 O2	242.224	9.196	1.20691e+06	351348	345638	279144	1.24102e+06	720554	217129	165908	165853	169285	1.43134e+06	3.41566e+06		545759	586154	1.29554e+06	441982	503223	1.53384e+06		1.07401	0.907928	2.37382	0.383776	2.21023	0.413274
sn-glycero-3-Phosphoethanolamine	C5 H14 N O6 P	215.055	15.303	2.21054e+07	2.96731e+06	3.46072e+06	1.71702e+06	2.19881e+06	3.83642e+06	2.38071e+06	2.36129e+06	2.35665e+06	1.74763e+06	3.24447e+06	3.57732e+06		7.56261e+06	2.69431e+06	2.73152e+06	9.72293e+06	765762	834079		0.356267	0.35667	0.361187	0.360351	1.01381	0.949728
Dodecyl sulfate	C12 H26 O4 S	266.154	9.071	7.76935e+06	5.0342e+06	5.44129e+06	5.23366e+06	7.84009e+06	7.00035e+06	1.03658e+07	2.14387e+06	1.2506e+07	4.52421e+06	2.80954e+07	3.05282e+07		5.86962e+06	6.83753e+06	1.89134e+07	1.27734e+06	3.44049e+06	1.24809e+07		1.1649	0.616789	3.22226	0.0828095	2.76612	0.111368
Maleamate	C4 H5 N O3	115.027	12.569	1.57307e+07	2.94277e+07	2.72022e+07	1.96737e+07	2.34382e+07	2.42027e+07	2.54495e+07	2.62901e+07	2.03959e+07	2.0006e+07	1.24758e+07	1.71186e+07		2.30086e+07	2.48451e+07	1.74991e+07	6.40003e+06	1.27088e+06	3.65395e+06		1.07982	0.593878	0.760547	0.185494	0.704327	0.00899176
Sulfate	H2 O4 S	97.9674	16.692	4.63536e+06	2.47802e+06	2.17424e+06	1.34147e+06	1.48434e+06	1.11305e+06	846260	834050	1.87795e+06	1.06877e+06	1.00171e+07	5.10939e+06		2.65727e+06	1.06943e+06	4.51831e+06	1.40352e+06	305102	4.06027e+06		0.402452	0.0690454	1.70036	0.419561	4.22499	0.141191
(S)-Methylmalonatesemialdehyde	C4 H6 O3	102.032	13.797	7.86962e+07	9.98628e+07	1.3326e+08	7.01261e+07	7.39373e+07	7.57333e+07	8.28601e+07	6.02331e+07	5.70954e+07	5.49481e+07	5.29907e+07	6.77685e+07		9.54864e+07	7.3191e+07	5.82007e+07	2.81134e+07	9.45899e+06	6.59515e+06		0.766507	0.183454	0.609518	0.041634	0.795189	0.0406649
Nicotinamide	C6 H6 N2 O	122.048	8.291	5.92784e+07	9.34831e+07	8.39248e+07	7.33819e+07	5.22598e+07	4.6586e+07	7.88751e+07	7.63976e+07	5.20198e+07	4.99971e+07	7.05218e+07	4.21158e+07		7.75171e+07	6.35296e+07	5.36636e+07	1.46711e+07	1.6484e+07	1.20235e+07		0.819557	0.251874	0.692281	0.0455908	0.844702	0.370838
Phenol	C6 H6 O	94.0417	6.474	812173	973609	680727	719501	1.06914e+06	465381	1.58471e+06	3.88556e+06	4.39396e+06	1.74899e+06	3.08326e+06	1.07878e+07		796502	1.7512e+06	5.0035e+06	130314	1.49463e+06	4.00452e+06		2.19861	0.250224	6.28184	0.0804765	2.85719	0.178888
Paracetamol	C8 H9 N O2	151.063	17.089	261892	185811	192620	205869	407099	239715	245652	269292	405375	449897	127248	176812		211548	290440	289833	34580.6	78815.3	161429		1.37292	0.116464	1.37006	0.379551	0.997912	0.994832
(S)-2-Acetolactate	C5 H8 O4	132.042	13.98	3.3718e+07	3.78698e+07	1.96918e+07	1.73e+07	1.1086e+07	8.52299e+06	9.47656e+06	8.86812e+06	4.90352e+06	7.82507e+06	5.77587e+06	9.16627e+06		2.71449e+07	9.48842e+06	6.91768e+06	1.01768e+07	1.13567e+06	1.93564e+06		0.349547	0.0136571	0.254843	0.00793648	0.729066	0.061859
2-Hydroxyethanesulfonate	C2 H6 O4 S	125.999	12.099	414151	959327	977347	1.22885e+06	3.29987e+06	1.38852e+06	4.00379e+06	5.48239e+06	4.08077e+06	4.22499e+06	1.12878e+06	801071		894918	3.54364e+06	2.5589e+06	343312	1.70044e+06	1.84636e+06		3.95974	0.0224043	2.85937	0.12676	0.72211	0.462516
Methylimidazoleaceticacid	C6 H8 N2 O2	140.059	10.901	179995	753340	1.04977e+06	651307	1.06749e+06	808505	763510	626849	1.42368e+06	869402	627842	1.01466e+06		658602	816590	983897	361064	184244	333788		1.23988	0.465311	1.49392	0.233984	1.20489	0.413891
3-Hydroxyaminophenol	C6 H7 N O2	125.048	8.089	5.3002e+08	5.7037e+08	5.18327e+08	6.19311e+08	6.49188e+08	6.22677e+08	4.93126e+08	6.50446e+08	6.16327e+08	5.08206e+08	5.08983e+08	5.51644e+08		5.59507e+08	6.03859e+08	5.4629e+08	4.56795e+07	7.49245e+07	5.09116e+07		1.07927	0.351093	0.976378	0.712492	0.904664	0.25076
(1-Ribosylimidazole)-4-acetate	C10 H14 N2 O6	258.085	11.942	1.40222e+06	232260	102321	302808	673159	82631.7	520046	999874	390014	430386	736802	221839		509903	568928	444760	600647	380986	214621		1.11576	0.873634	0.872245	0.844902	0.781751	0.590698
Acetonecyanohydrin	C4 H7 N O	85.0526	8.333	237763	441459	338383	406168	471044	449050	449372	320859	367124	290112	452287	270818		355943	422581	345085	89648.3	68591.4	82695.3		1.18722	0.282401	0.969495	0.864542	0.816613	0.199232
1,4-Lactone	C4 H6 O2	86.0367	9.387	5.76671e+06	6.40418e+06	9.89959e+06	6.65326e+06	4.37371e+06	4.82305e+06	4.79874e+06	3.56198e+06	3.27184e+06	3.47716e+06	5.61931e+06	5.00336e+06		7.18094e+06	4.38937e+06	4.34292e+06	1.85049e+06	588921	1.14922e+06		0.611254	0.0282408	0.604784	0.0403516	0.989416	0.944978
(2R)-2,3-Dihydroxypropanoic acid	C3 H6 O4	106.027	13.355	5.63511e+06	2.31856e+06	5.17082e+06	5.44878e+06	1.84872e+06	4.57915e+06	1.31439e+06	1.41935e+06	1.70614e+06	3.72605e+06	68297.2	144762		4.64332e+06	2.2904e+06	1.41131e+06	1.56153e+06	1.54324e+06	1.71782e+06		0.493268	0.0757882	0.303944	0.0318105	0.616185	0.475285
N1-Benzyl-2-[(2-oxo-3-piperidyl)carbonyl]hydrazine-1-carbothioamide	C14 H18 N4 O2 S	130.058	7.64	511816	463328	449740	303713	288573	182779	321590	360055	393949	308718	64821.8	61545.6		432149	288249	207259	89673.9	76139.6	169968		0.667013	0.0500283	0.479599	0.0578046	0.719026	0.417878
2-Aminomuconatesemialdehyde	C6 H7 N O3	141.043	9.47	93806.7	92586.8	103624	67130.1	64725.7	84568.1	120167	84871.4	63077.7	60432.5	135666	2.37938e+06		89286.8	88583	659640	15575.4	23069.5	1.14703e+06		0.992117	0.96131	7.38788	0.358424	7.44658	0.357923
Meso-erythritol	C4 H10 O4	122.058	11.445	71875.4	77751.3	66944.5	52092.5	69762	60126.8	126728	112629	79929.1	79754.6	94686.4	171344		67165.9	92311.4	106429	10977	32360.6	43839.2		1.37438	0.191513	1.58456	0.132957	1.15293	0.62289
Acetaminophen glucuronide	C14 H17 N O8	327.095	11.76	66001	62178.2	62859.1	49453.3	46792.6	49886.9	51413.2	44925.2	36736.8	41885.9	74150.1	127502		60122.9	48254.5	70068.6	7305.31	2936.19	41715.2		0.802597	0.0235527	1.16542	0.655161	1.45206	0.33702
(R)(-)-Allantoin	C4 H6 N4 O3	158.044	14.604	7.94301e+07	1.94199e+07	2.45249e+07	1.83863e+07	9.14806e+06	9.93629e+06	9.52361e+06	9.8504e+06	5.78141e+06	9.02317e+06	1.01575e+07	5.95209e+06		3.54403e+07	9.61459e+06	7.72854e+06	2.9449e+07	358247	2.20022e+06		0.27129	0.130006	0.218072	0.109643	0.803834	0.141568
Agaritine	C12 H17 N3 O4	267.121	11.094	290147	212060	160262	175547	186971	210130	161846	141881	143893	156230	153492	232856		209504	175207	171618	57987.5	29704.7	41166.6		0.836295	0.332969	0.819162	0.327635	0.979513	0.892172
(R)-Lactaldehyde	C3 H6 O2	74.0366	15.853	1.09416e+07	5.62594e+06	1.45231e+07	8.84149e+06	9.47704e+06	6.88691e+06	1.01393e+07	1.01871e+07	4.44776e+06	5.7204e+06	9.2396e+06	6.94778e+06		9.98304e+06	9.17261e+06	6.58889e+06	3.73357e+06	1.55788e+06	2.04074e+06		0.918819	0.702551	0.660008	0.161731	0.718322	0.0908132
4-Hydroxybutyric acid (GHB)	C4 H8 O3	104.047	8.564	4.76205e+06	5.27501e+06	7.28478e+06	5.29722e+06	5.40813e+06	4.21488e+06	4.38558e+06	3.73345e+06	2.55156e+06	5.15146e+06	4.3714e+06	3.19545e+06		5.65476e+06	4.43551e+06	3.81747e+06	1.11444e+06	704758	1.16559e+06		0.784385	0.113896	0.675089	0.0629182	0.86066	0.399124
4-Nitrophenol	C6 H5 N O3	139.027	7.422	470497	385591	511645	373495	524386	423556	496463	439790	294958	397151	721235	572262		435307	471049	496402	66728.9	47340.8	188622		1.08211	0.415873	1.14035	0.563793	1.05382	0.803013
Hydantoin-5-propionate	C6 H8 N2 O4	172.048	13.242	31755.3	38713.7	31544.2	26497.9	30715.6	1.57126e+06	26916.1	15720.8	1.8553e+06	15358	18832.3	1.071e+06		32127.8	411152	740124	5018.28	773429	894177		12.7974	0.36489	23.0369	0.164386	1.80012	0.597988
(R)-2,3-Dihydroxy-3-methylpentanoate	C6 H12 O4	148.073	6.878	107585	104273	60576.6	60424	77554.3	50214.4	48491.5	27058.7	33908.8	40041.6	16912.4	22985.9		83214.7	50829.7	28462.2	26263.2	20697.1	10442.5		0.610826	0.100862	0.342033	0.00822299	0.559951	0.101885
Imidazolone	C3 H4 N2 O	84.0322	8.488	2.35709e+06	2.61217e+06	3.28039e+06	3.17283e+06	3.38449e+06	3.82281e+06	4.7895e+06	3.98697e+06	3.94611e+06	4.95201e+06	2.85059e+06	2.613e+06		2.85562e+06	3.99594e+06	3.59043e+06	443039	586988	1.07752e+06		1.39933	0.0210849	1.25732	0.253979	0.898518	0.533173
Sulfoacetaldehyde	C2 H4 O4 S	123.983	15.409	156171	67950.4	68649	49890.4	69499	25651.1	232341	420609	266636	674281	22881.4	41446.4		85665.1	187025	251311	47799	179322	302964		2.18321	0.316592	2.93365	0.321572	1.34373	0.727486
(S)-Cheilanthifoline	C19 H19 N O4	325.127	7.58	91453.9	100081	126163	87143.7	69407.3	78951.7	104580	71743.3	77923.3	52397.7	17625.4	23161.2		101210	81170.6	42776.9	17482.9	16126.4	27959.5		0.801998	0.142949	0.422653	0.0121591	0.527	0.0548411
Monobutyl phthalate	C12 H14 O4	222.089	4.829	1.44455e+06	61924.2	95941.5	50143.8	85855.2	49638.9	88798.9	41197.4	45323.9	47870.6	177043	46695.5		413141	66372.6	79233.4	687883	24469.8	65215		0.160654	0.352547	0.191783	0.371123	1.19377	0.724606
DL-4-Hydroxyphenyllactic acid	C9 H10 O4	182.057	9.978	26353.6	289785	272706	141453	62395.6	143835	314353	144106	402672	62184.4	250198	108403		182574	166172	205864	123442	106008	153668		0.910162	0.846886	1.12756	0.82105	1.23886	0.6855
(R)-Pantolactone	C6 H10 O3	130.063	7.695	54879	54028.2	77985.3	53535.1	44187	53447.4	70708	49209.1	48198.9	73514.7	26709.6	32228.5		60106.9	54387.9	45162.9	11931.9	11519.7	20983.1		0.904853	0.516188	0.751377	0.261891	0.830386	0.4701
CAI-1	C13 H26 O2	214.193	8.141	222294	87206.9	97966.7	73240.8	73790.4	85198.9	97434.2	94506.5	78292.3	85743.2	606592	385093		120177	87732.5	288930	68826.2	10658.5	255479		0.730027	0.387451	2.4042	0.249258	3.29331	0.166624
Hyponitrite	H2 N2 O2	62.0127	8.26	108018	739615	476684	370922	599223	490757	554401	452760	44133.4	376539	166609	545101		423810	524286	283095	261439	65224.4	222149		1.23708	0.483984	0.667978	0.443398	0.539964	0.0823375
Azelaic acid	C9 H16 O4	188.105	13.232	9.40835e+06	368598	937023	464981	2.02702e+06	303810	1.96344e+06	431975	894676	414066	1.10445e+06	421074		2.79474e+06	1.18156e+06	708566	4.41607e+06	941357	346766		0.422781	0.501733	0.253536	0.382599	0.599686	0.382095
1,4-Diguanidinobutane	C6 H16 N6	172.146	11.987	132800	120605	125805	96116.4	101441	75046.4	103616	201822	69118	71010.5	86266.5	343931		118831	120482	142581	15946.3	55760.4	134452		1.01389	0.956467	1.19986	0.737708	1.18343	0.771642
Terephthalic acid	C8 H6 O4	166.026	14.837	681731	65751.1	36902.4	42816.4	18626.8	14216.9	19050.6	66158.1	12450.6	14826.8	33199.3	34207.1		206800	29513.1	23670.9	316865	24527.6	11632.1		0.142713	0.307243	0.114463	0.291968	0.802048	0.681917
[FAhydroxy(4:0)]N-(3S-hydroxy-butanoyl)-homoserinelactone	C8 H13 N O4	187.084	9.331	343691	548172	190144	301144	588760	360518	239744	411996	378306	491469	325750	458728		345788	400255	413563	149646	144931	75417.1		1.15751	0.619781	1.196	0.449453	1.03325	0.87593
Nonanoicacid	C9 H18 O2	158.131	4.597	664803	630273	249716	21977.8	25755.2	26557.8	18005.4	16696.9	11396.5	12676.8	17431.3	19864.4		391693	21753.8	15342.3	310030	5122.25	3978.58		0.055538	0.0543112	0.0391691	0.0513277	0.705267	0.0954079
p-cresolsulfatepotassium;p-Cresolsulfate	C7 H8 O4 S	188.014	11.96	13559.1	17159.8	15413	14902.6	13230.9	11744.7	12306.8	10339.6	7318.93	6886.6	19339.7	36383.1		15258.6	11905.5	17482.1	1489.22	1210.45	13859.5		0.78025	0.0129137	1.14572	0.760524	1.4684	0.453311
N-Glycolylneuraminic acid	C11 H19 N O10	325.1	15.404	303126	41002	389405	249127	429725	299424	392084	51308	401802	427777	26972.4	52503.4		245665	293135	227264	148169	170262	217046		1.19323	0.688668	0.925096	0.89321	0.775286	0.649853
Benzoic acid	C7 H6 O2	122.037	10.461	295606	21296.9	161778	204922	106139	265629	511104	516502	1.25045e+06	76594.9	280830	890051		170901	349844	624481	114271	200220	541799		2.04705	0.171549	3.65405	0.152471	1.78503	0.37835
Cholinephosphate	C5 H14 N O4 P	183.066	14.918	3.58091e+06	9.41219e+06	4.14044e+06	1.03132e+06	6.51949e+06	1.91441e+07	1.11891e+07	1.43163e+06	2.42899e+07	6.1619e+07	2.73684e+07	1.4356e+07		4.54121e+06	9.5711e+06	3.19083e+07	3.51798e+06	7.52384e+06	2.05707e+07		2.10761	0.271357	7.02639	0.0394428	3.33382	0.0874919
1-Aminocyclopropane-1-carboxylate	C4 H7 N O2	101.048	9.576	1.83976e+06	2.24461e+06	1.15405e+06	1.42405e+06	2.0946e+06	786094	1.07376e+06	1.63305e+06	962019	1.0714e+06	1.03081e+06	1.88536e+06		1.66562e+06	1.39688e+06	1.2374e+06	478057	583109	434325		0.838653	0.502723	0.742906	0.233088	0.885832	0.67625
Decanoicacid	C10 H20 O2	172.146	13.094	193524	213277	209452	182368	491847	277483	226126	118149	279915	97665.8	257546	194693		199655	278401	207455	14352	157028	81600.8		1.39441	0.356456	1.03907	0.856864	0.745165	0.453237
D-(+)-Arabitol	C5 H12 O5	152.068	14.68	273944	746602	906906	304338	1.28439e+06	990216	1.06874e+06	443231	982436	1.17816e+06	645006	997614		557948	946644	950803	317458	357913	222407		1.69666	0.155302	1.70411	0.0890269	1.00439	0.984892
2,6-Dihydroxynicotinate	C6 H5 N O4	155.022	15.804	16683.4	22046.8	104805	17329.4	221230	202871	311941	137659	269858	165770	20341.5	36770		40216.2	218425	123185	43125.7	71921.6	117432		5.43127	0.00537929	3.06307	0.232947	0.563969	0.215862
2-Oxovalericacid	C5 H8 O3	116.047	10.944	55655.8	33127.6	29380.4	29122.9	22842.2	50368.9	25099.2	34666.4	33248.8	33299.6	41921	44086.6		36821.7	33244.2	38139	12688.8	12514.3	5686.59		0.902842	0.701977	1.03578	0.855963	1.14724	0.50308
Thioacetate	C2 H4 O S	75.9979	13.393	2969.76	15974.7	12912	11839.3	13355.8	8097.78	13521.2	11459.6	8732.3	10525.3	15240	27935.8		10923.9	11608.6	15608.3	5584.79	2520.52	8664.47		1.06268	0.830569	1.42882	0.398464	1.34455	0.409473
3,4-Dimethylbenzoic acid	C9 H10 O2	150.068	5.127	38237.5	19112	16509.3	14185	14630.1	18908.8	16390	14073	10627.6	12092.3	9244.06	15602.6		22010.9	16000.5	11891.7	11003.3	2175.91	2733.69		0.726932	0.325044	0.540261	0.124503	0.743207	0.0569059
Vanillin	C8 H8 O3	152.047	6.955	79106.7	80033	49448.2	46595.9	53835.4	35903.2	35378.9	14751.2	27281.5	13973.4	59801.7	14246.5		63795.9	34967.2	28825.8	18255.2	15976.4	21564.2		0.54811	0.0550117	0.451843	0.0481011	0.824366	0.663294
Suberic acid	C8 H14 O4	174.089	13.465	4.93606e+06	183089	598227	186164	1.93647e+06	207505	1.68202e+06	229108	1.02382e+06	342175	761269	195253		1.47589e+06	1.01377e+06	580630	2.31501e+06	924424	380537		0.686892	0.723551	0.393411	0.474276	0.572741	0.419482
Inosine-5'-monophosphate (IMP)	C10 H13 N4 O8 P	348.046	15.16	251506	257920	253012	212734	14420.4	10635.1	148737	101571	10641.7	12140.4	122213	27173.3		243793	68840.9	43042.1	20886.3	67833.5	53305.8		0.282374	0.00263052	0.176552	0.00041926	0.62524	0.571657
2-Oxooctadecanoicacid	C18 H34 O3	298.25	7.425	48054.9	53716.6	45924.4	44857.8	35916.3	30704.7	40753	27578.2	31148.4	17580.7	82981.9	11478.3		48138.4	33738	35797.3	3949.18	5805.11	32512.8		0.700855	0.00634274	0.743633	0.4796	1.06104	0.904832
Pyrazinamide	C5 H5 N3 O	123.043	5.558	42270.5	49298.1	70764	57569.5	42203.9	33629.4	56093.5	51316.2	40655.3	56409.2	63526.5	16577.4		54975.5	45810.8	44292.1	12242.8	9957.21	20801.6		0.833294	0.289548	0.80567	0.410101	0.966849	0.899525
L(-)-Carnitine	C7 H15 N O3	161.105	13.745	1.92111e+08	1.03809e+08	8.19548e+07	7.77608e+07	1.12866e+08	9.47396e+07	1.5165e+08	1.41285e+08	1.24879e+08	2.3337e+08	1.23558e+08	1.08285e+08		1.13909e+08	1.25135e+08	1.47523e+08	5.3371e+07	2.60657e+07	5.77247e+07		1.09855	0.718437	1.29509	0.425302	1.17891	0.506116
Creatinine	C4 H7 N3 O	113.059	10.182	5.16026e+06	3.70539e+06	4.6949e+06	3.71922e+06	5.18147e+06	3.99521e+06	5.80853e+06	8.88517e+06	6.44502e+06	9.51219e+06	6.28127e+06	6.61253e+06		4.31994e+06	5.9676e+06	7.21275e+06	726928	2.08533e+06	1.53892e+06		1.38141	0.186256	1.66964	0.014507	1.20865	0.373717
Creatine	C4 H9 N3 O2	131.069	14.618	3.81839e+07	2.40821e+07	4.2174e+07	4.43808e+07	6.66684e+07	5.38706e+07	8.7445e+07	8.9381e+07	6.08469e+07	1.2858e+08	1.14736e+08	6.0098e+07		3.72052e+07	7.43413e+07	9.10651e+07	9.11688e+06	1.70863e+07	3.5776e+07		1.99814	0.00860785	2.44765	0.0267109	1.22496	0.431211
1-Methylhistidine	C7 H11 N3 O2	169.084	13.251	2.96864e+06	2.81109e+06	2.32479e+06	2.39562e+06	1.42232e+06	668684	1.62104e+06	1.14338e+06	685313	951172	1.30061e+06	629900		2.62503e+06	1.21386e+06	891749	313826	412890	306530		0.462416	0.00159927	0.33971	0.000217836	0.734642	0.256906
Dihydrothymine	C5 H8 N2 O2	128.058	12.65	7.77322e+06	7.17321e+06	6.86595e+06	7.05224e+06	6.20237e+06	4.9861e+06	5.48091e+06	4.16056e+06	7.06048e+06	6.02524e+06	5.55289e+06	4.77464e+06		7.21616e+06	5.20748e+06	5.85331e+06	392293	858219	955792		0.721642	0.00533682	0.81114	0.0386339	1.12402	0.353455
Choline	C5 H13 N O	103.099	17.871	1.63949e+08	8.78632e+07	4.62859e+07	3.53942e+07	5.28705e+07	5.50675e+07	6.9871e+07	3.32143e+07	5.75933e+07	6.36289e+07	5.60887e+07	4.60681e+07		8.3373e+07	5.27558e+07	5.58448e+07	5.8281e+07	1.50572e+07	7.2868e+06		0.632769	0.348276	0.669819	0.384747	1.05855	0.724572
Acetylcholine	C7 H15 N O2	145.11	14.943	2.19269e+06	2.71031e+06	2.64498e+06	1.99651e+06	2.36164e+06	1.8488e+06	1.77534e+06	4.28462e+06	2.86334e+06	6.96809e+06	2.82041e+06	2.71978e+06		2.38612e+06	2.5676e+06	3.8429e+06	347043	1.17402e+06	2.08432e+06		1.07606	0.776858	1.61052	0.217135	1.49669	0.327341
2_5-Dihydroxypyridine	C5 H5 N O2	111.032	6.908	2.90777e+08	2.50891e+08	1.82115e+08	1.7594e+08	2.40521e+08	3.08533e+08	1.38962e+08	2.23355e+08	2.27987e+08	2.44224e+08	2.02577e+08	3.15914e+08		2.24931e+08	2.27842e+08	2.47675e+08	5.55064e+07	6.97414e+07	4.86139e+07		1.01294	0.950031	1.10112	0.560211	1.08705	0.657259
(2S)-2-{[1-(R)-Carboxyethyl]amino}pentanoate	C8 H15 N O4	189.099	3.985	1.08427e+07	1.59593e+07	1.38159e+07	1.16407e+07	1.45917e+07	1.07019e+07	1.24591e+07	1.13506e+07	6.97223e+06	8.47708e+06	1.03579e+07	1.18875e+07		1.30646e+07	1.22758e+07	9.42367e+06	2.30278e+06	1.70586e+06	2.14854e+06		0.939622	0.601851	0.721311	0.0600926	0.76766	0.082815
D-Pipecolicacid	C6 H11 N O2	129.08	6.444	6.04975e+06	9.66296e+06	7.09274e+06	6.27397e+06	7.64318e+06	6.4762e+06	6.79724e+06	6.76388e+06	6.09536e+06	8.08352e+06	6.65356e+06	4.73562e+06		7.26986e+06	6.92013e+06	6.39201e+06	1.65718e+06	503121	1.38579e+06		0.951893	0.700306	0.879249	0.447417	0.923685	0.500651
N5-Ethyl-L-glutamine	C7 H14 N2 O3	174.1	4.285	4.88287e+07	1.15209e+07	1.1839e+07	7.18107e+06	7.76805e+06	3.37232e+06	7.35745e+06	7.48182e+06	2.58291e+06	4.00465e+06	6.9517e+06	6.54571e+06		1.98424e+07	6.49491e+06	5.02124e+06	1.94406e+07	2.08881e+06	2.08403e+06		0.327325	0.221132	0.253056	0.180286	0.773104	0.356419
Indole-3-acrylic acid	C11 H9 N O2	187.063	12.889	538141	1.41093e+06	716530	726429	829506	658462	553207	452014	894764	473300	709412	779384		848008	623298	714215	385127	161255	177865		0.735014	0.323115	0.842227	0.55144	1.14587	0.477497
Υ-Aminobutyric acid (GABA)	C4 H9 N O2	103.063	15.052	1.05779e+07	1.04886e+07	1.29662e+07	9.47875e+06	1.59459e+07	9.85191e+06	1.04177e+07	1.04354e+07	1.23107e+07	1.4719e+07	1.24306e+07	8.46957e+06		1.08779e+07	1.16627e+07	1.19825e+07	1.47875e+06	2.86827e+06	2.59085e+06		1.07215	0.643921	1.10154	0.486923	1.02742	0.874028
4-Methylene-L-glutamine	C6 H10 N2 O3	158.069	15.244	5.57395e+06	2.65454e+06	3.82812e+06	3.35731e+06	5.15997e+06	4.18381e+06	3.25788e+06	3.17277e+06	4.45678e+06	2.03504e+06	3.6286e+06	5.8264e+06		3.85348e+06	3.94361e+06	3.9867e+06	1.24422e+06	931245	1.58563e+06		1.02339	0.911448	1.03457	0.89915	1.01093	0.964137
Ketoprofen	C16 H14 O3	254.089	6.49	757515	1.56292e+07	1.29201e+07	1.04654e+07	6.04291e+06	7.02761e+06	4.65725e+06	6.27018e+06	6.18263e+06	4.8921e+06	4.76378e+06	7.07481e+06		9.94305e+06	5.99949e+06	5.72833e+06	6.47667e+06	988906	1.10288e+06		0.603385	0.273992	0.576114	0.246807	0.954804	0.726851
Acetyl-L-carnitine	C9 H17 N O4	203.115	10.209	1.59898e+07	2.33127e+07	3.08615e+07	2.53437e+07	3.19264e+07	3.77181e+07	2.97947e+07	3.60622e+07	3.14789e+07	4.65586e+07	3.38591e+07	2.08119e+07		2.38769e+07	3.38753e+07	3.31771e+07	6.14984e+06	3.65146e+06	1.05721e+07		1.41875	0.0313325	1.38951	0.179128	0.979388	0.904719
Anserine	C10 H16 N4 O3	240.121	14.263	255525	258678	74635.9	153243	102942	103386	99719.3	153980	185941	66399.4	155732	149130		185520	115007	139301	88675.2	26033.4	51174.5		0.619915	0.177865	0.750864	0.401378	1.21124	0.429872
Maleimide	C4 H3 N O2	97.0161	6.848	5.29445e+06	9.4695e+06	1.50358e+07	1.27428e+07	1.23778e+07	1.25613e+07	1.23002e+07	1.25207e+07	1.20133e+07	1.35262e+07	1.35993e+07	1.36812e+07		1.06356e+07	1.244e+07	1.3205e+07	4.23041e+06	121964	796977		1.16966	0.426545	1.24158	0.27764	1.06149	0.106521
5'-S-Methyl-5'-thioadenosine	C11 H15 N5 O3 S	297.088	6.997	881898	1.0557e+06	1.48646e+06	2.31321e+06	998353	681782	883010	1.50214e+06	1.32722e+06	1.31611e+06	1.06469e+06	1.57389e+06		1.43432e+06	1.01632e+06	1.32048e+06	638668	349298	207934		0.708574	0.294508	0.920629	0.746169	1.29927	0.185177
5-Hydroxylysine	C6 H14 N2 O3	162.1	17.647	42255.7	38706.6	21755.3	37209.2	41281.9	13190	28704.9	23436.8	26379.2	30626.3	24172.2	29731.6		34981.7	26653.4	27727.3	9068	11687.7	2993.2		0.761924	0.303185	0.792624	0.179479	1.04029	0.864559
1-Aminocyclohexanecarboxylic acid	C7 H13 N O2	143.094	9.452	1.85559e+07	1.93102e+07	1.95106e+07	1.42618e+07	1.82044e+07	1.75659e+07	1.50035e+07	2.78387e+07	2.03541e+07	2.70578e+07	2.5615e+07	1.13584e+07		1.79096e+07	1.96531e+07	2.10963e+07	2.46641e+06	5.62962e+06	7.10249e+06		1.09735	0.591062	1.17793	0.429124	1.07343	0.760914
Ethanolamine	C2 H7 N O	61.0526	18.471	576473	1.05703e+06	501196	546142	523632	385164	437102	309727	544944	386516	423838	465384		670209	413906	455171	259725	89920.7	67967.4		0.617578	0.111443	0.679147	0.160286	1.09969	0.491663
2-Methylpropanaloxime	C4 H9 N O	87.0682	11.483	3.07536e+07	4.9346e+07	3.9151e+07	3.79979e+07	3.69039e+07	3.43984e+07	4.31142e+07	4.2757e+07	2.91996e+07	3.02597e+07	2.06654e+07	2.62914e+07		3.93121e+07	3.92934e+07	2.6604e+07	7.65246e+06	4.33074e+06	4.29983e+06		0.999523	0.996738	0.676738	0.0274943	0.677061	0.00595398
Carnosine	C9 H14 N4 O3	226.106	14.987	79810.6	34982.5	41143.5	29173.3	46008.8	48148.1	58144.6	132960	31594.7	44703.8	36172.2	37776		46277.5	71315.4	37561.7	22883.5	41435.5	5434.19		1.54104	0.330814	0.811662	0.48659	0.526698	0.157354
Piperidine	C5 H11 N	85.0889	12.051	5.3469e+06	8.32414e+06	4.23374e+06	3.76333e+06	3.7439e+06	3.83562e+06	4.26682e+06	3.21629e+06	3.59961e+06	2.47935e+06	3.68926e+06	3.95126e+06		5.41703e+06	3.76566e+06	3.42987e+06	2.04867e+06	431408	651010		0.695153	0.165746	0.633165	0.113972	0.910828	0.422854
Valerophenone;1-phenylpentan-1-one	C11 H14 O	162.108	12.493	1.80406e+07	1.1684e+07	9.60054e+06	9.17405e+06	1.32467e+07	1.31878e+07	1.77999e+07	1.75576e+07	1.47987e+07	2.93568e+07	1.58389e+07	1.23931e+07		1.21248e+07	1.5448e+07	1.80969e+07	4.0935e+06	2.57786e+06	7.6441e+06		1.27408	0.218585	1.49255	0.217548	1.17147	0.535729
1-(beta-D-Ribofuranosyl)-1_4-dihydronicotinamide	C11 H16 N2 O5	256.105	6.563	84801.7	284668	512060	273152	838543	309851	303033	243575	267187	594483	410768	547229		288670	423751	454917	174854	278126	147413		1.46794	0.442326	1.5759	0.196222	1.07355	0.849569
5-methylthiopentanaldoxime	C6 H13 N O S	147.072	14.26	9.25542e+06	1.23499e+07	1.36187e+07	1.37927e+07	8.09049e+06	7.54702e+06	9.36951e+06	8.94175e+06	9.43531e+06	7.25408e+06	8.17257e+06	5.13961e+06		1.22542e+07	8.48719e+06	7.50039e+06	2.10005e+06	821868	1.81013e+06		0.692596	0.0155966	0.612069	0.0139845	0.883731	0.359157
Propionylcarnitine	C10 H19 N O4	217.131	8.943	4.09484e+06	1.07237e+07	8.02188e+06	9.18973e+06	6.00727e+06	4.82839e+06	6.8503e+06	6.80042e+06	8.45219e+06	1.08922e+07	8.34972e+06	6.66327e+06		8.00755e+06	6.12159e+06	8.58934e+06	2.83341e+06	944684	1.7406e+06		0.764478	0.25349	1.07266	0.738358	1.40312	0.0470267
4-Nitroacetophenone	C8 H7 N O3	165.04	6.071	1.75157e+06	1.19793e+07	7.56621e+06	7.41634e+06	9.56828e+06	1.15178e+07	8.91573e+06	6.98232e+06	6.89882e+06	6.83244e+06	7.13686e+06	7.81456e+06		7.17837e+06	9.24603e+06	7.17067e+06	4.19152e+06	1.87067e+06	448714		1.28804	0.402334	0.998928	0.997205	0.775541	0.0743187
Cystathionine	C7 H14 N2 O4 S	222.067	15.623	1.11191e+06	232542	146407	194493	274835	174425	128455	99816.6	154764	111979	144206	139435		421338	169383	137596	461728	76724.7	18239.8		0.402012	0.323033	0.326569	0.265401	0.812336	0.450926
Tetrahydrobiopterin	C9 H15 N5 O3	241.113	4.855	786098	1.87545e+06	1.3731e+06	1.18914e+06	1.53985e+06	940288	1.16479e+06	753751	793739	1.06693e+06	892853	1.01029e+06		1.30595e+06	1.09967e+06	940952	451934	338164	122014		0.842049	0.492386	0.720513	0.169913	0.855667	0.411219
L-Ergothioneine	C9 H15 N3 O2 S	229.088	13.68	1.70622e+07	1.69077e+07	1.48654e+07	1.35832e+07	1.33792e+07	1.17206e+07	1.46065e+07	1.11855e+07	1.36259e+07	1.34223e+07	1.07919e+07	5.13881e+06		1.56046e+07	1.2723e+07	1.07447e+07	1.67879e+06	1.56492e+06	3.95385e+06		0.815333	0.0458296	0.68856	0.0643008	0.844514	0.388047
6-methylthiohexanaldoxime	C7 H15 N O S	161.088	11.067	1.25207e+07	6.64687e+06	4.94857e+06	5.50193e+06	6.83155e+06	6.88051e+06	5.10348e+06	5.9915e+06	5.67171e+06	5.12455e+06	4.80368e+06	5.02204e+06		7.40452e+06	6.20176e+06	5.1555e+06	3.48333e+06	838208	369241		0.837565	0.526947	0.696264	0.246456	0.831295	0.0624053
4-Guanidinobutyric acid	C5 H11 N3 O2	145.085	14.26	2.24161e+06	3.94628e+06	2.99903e+06	1.30195e+06	5.89254e+06	7.79684e+06	3.76486e+06	1.69853e+06	9.08061e+06	4.31464e+06	4.38212e+06	5.39861e+06		2.62222e+06	4.78819e+06	5.794e+06	1.12296e+06	2.63722e+06	2.24648e+06		1.82601	0.18146	2.20958	0.0449346	1.21006	0.582605
Prolinamide	C5 H10 N2 O	114.079	18.061	4.72497e+06	1.64429e+06	1.31358e+06	1.22954e+06	1.55571e+06	1.61645e+06	1.28379e+06	1.38089e+06	1.5838e+06	1.38692e+06	1.35207e+06	1.34511e+06		2.2281e+06	1.45921e+06	1.41697e+06	1.67418e+06	153778	112712		0.654914	0.395636	0.635957	0.370986	0.971054	0.673242
Trigonelline	C7 H7 N O2	137.047	10.746	4.67004e+06	7.08564e+06	5.3927e+06	5.38445e+06	6.83526e+06	4.87886e+06	3.67967e+06	4.52814e+06	3.91024e+06	7.03182e+06	8.22145e+06	5.09646e+06		5.63321e+06	4.98048e+06	6.06499e+06	1.02583e+06	1.33507e+06	1.92925e+06		0.884129	0.467576	1.07665	0.706346	1.21775	0.390891
N-Acetyl-L-histidine	C8 H11 N3 O3	197.079	9.351	462687	868828	1.40177e+06	833954	931138	755794	907749	583340	1.21698e+06	740559	705242	947857		891809	794505	902659	386471	160813	235294		0.890891	0.65839	1.01217	0.963304	1.13613	0.476612
2-Hydroxycinnamic acid	C9 H8 O3	164.047	12.522	4.39187e+06	3.80469e+06	3.02346e+06	2.78374e+06	3.03783e+06	2.35751e+06	2.85816e+06	2.70092e+06	3.2247e+06	3.16493e+06	2.98659e+06	2.97439e+06		3.50094e+06	2.73861e+06	3.08765e+06	736747	288957	126220		0.782249	0.102329	0.88195	0.311166	1.12745	0.0687728
5-L-Glutamyl-taurine	C7 H14 N2 O6 S	254.056	15.237	6639.77	8346.67	7504.99	7106.37	6093.83	5653.43	6031.83	6661.18	7706	9057.91	8614.51	5474.53		7399.45	6110.07	7713.24	723.735	415.783	1595.02		0.825746	0.0213993	1.04241	0.732389	1.26238	0.0997184
Acetyl-β-methylcholine	C8 H17 N O2	159.126	12.551	8.74631e+06	4.75335e+06	4.74359e+06	3.95756e+06	3.13818e+06	2.45377e+06	2.994e+06	2.35055e+06	2.93807e+06	4.68373e+06	2.27732e+06	1.83487e+06		5.5502e+06	2.73413e+06	2.9335e+06	2.16312e+06	390095	1.25178e+06		0.492617	0.0427708	0.528539	0.0811447	1.07292	0.771311
D-O-Phosphoserine	C3 H8 N O6 P	185.008	15.992	4177.47	2619.25	4161.3	1797.61	3656.5	3061.27	4353.33	5638.12	4235.19	3732.08	6043.54	1835		3188.91	4177.3	3961.45	1180.82	1107.81	1730.55		1.30995	0.267922	1.24226	0.488645	0.948327	0.840543
N6-Acetyl-L-lysine	C8 H16 N2 O3	188.115	7.374	1.71994e+06	1.9102e+06	1.48535e+06	1.64256e+06	2.16383e+06	1.98752e+06	2.16956e+06	2.57793e+06	2.48209e+06	1.97876e+06	2.03049e+06	2.18942e+06		1.68951e+06	2.22471e+06	2.17019e+06	176558	250183	226431		1.31678	0.0128947	1.28451	0.0154546	0.975493	0.75755
Streptidine	C8 H18 N6 O4	262.138	14.624	5265.53	4483.18	3556.3	5985.11	2810.75	3724.72	5547.54	3965.64	4185.49	461728	4112.55	4555.06		4822.53	4012.16	118645	1043.45	1138.06	228722		0.831962	0.33429	24.6023	0.358028	29.5714	0.354862
5-Hydroxyindole-3-acetic acid	C10 H9 N O3	191.058	12.137	62667.1	67024.4	21294.8	17531.9	11152.1	8890.21	12394.3	10783.2	14053.2	14543.8	10263.4	8954.56		42129.5	10805	11953.7	26335.5	1450.67	2766.96		0.25647	0.0551217	0.283737	0.0628773	1.10632	0.489835
L-Saccharopine	C11 H20 N2 O6	244.105	5.264	186977	307630	500948	280076	395815	167570	123790	115511	581385	152826	196124	399997		318908	200672	332583	131883	132086	197805		0.629246	0.252145	1.04288	0.912164	1.65735	0.309816
N,N'-Methylenebisacrylamide	C7 H10 N2 O2	154.074	5.934	117250	246695	187912	134853	162352	168775	149676	147305	166172	186454	154949	164751		171677	157027	168081	58336.9	10246.1	13225.5		0.914663	0.638405	0.979053	0.908221	1.0704	0.234492
Imidazolelactic acid	C6 H8 N2 O3	156.053	10.868	685234	4.39709e+06	4.32129e+06	2.45522e+06	3.7586e+06	3.43396e+06	3.74753e+06	7.89277e+06	6.57768e+06	2.97324e+06	7.83898e+06	5.01266e+06		2.96471e+06	4.70822e+06	5.60064e+06	1.76518e+06	2.12837e+06	2.09871e+06		1.58809	0.254096	1.8891	0.102924	1.18955	0.572252
3_4-Dihydroxy-L-phenylalanine(L-Dopa)	C9 H11 N O4	197.066	6.35	28514.6	73703.3	67313.2	67541.7	59080.2	34023	58325.5	41265.5	31097.1	33133.6	42761.6	40917.3		59268.2	48173.6	36977.4	20714.9	12516.3	5725.15		0.812807	0.394599	0.6239	0.0833806	0.767587	0.154877
Methionine sulfoxide	C5 H11 N O3 S	165.045	12.71	349365	414282	552769	122020	188373	139813	139628	138816	301971	284938	168800	149042		359609	151658	226188	179679	24480.9	78399.6		0.421729	0.0616467	0.628983	0.222359	1.49144	0.119466
O-Phosphorylethanolamine	C2 H8 N O4 P	141.019	15.773	544087	2.0958e+06	381824	1.19856e+06	743730	1.26379e+06	2.47362e+06	2.45133e+06	2.32895e+06	4.25991e+06	2.72285e+06	3.69959e+06		1.05507e+06	1.73312e+06	3.25283e+06	778476	868587	884731		1.64266	0.289121	3.08305	0.00973812	1.87686	0.0496916
L-2_4diaminobutyricacid	C4 H10 N2 O2	118.076	12.351	3.80905e+06	2.22315e+06	2.63444e+06	2.74682e+06	3.22488e+06	2.43138e+06	1.63394e+06	3.4478e+06	2.78315e+06	4.19629e+06	4.03219e+06	3.08321e+06		2.85336e+06	2.6845e+06	3.52371e+06	675717	825101	696032		0.94082	0.762223	1.23493	0.216209	1.31261	0.170979
N-Acetylglutamine	C7 H12 N2 O4	188.079	10.607	3.95731e+06	6.51806e+06	9.72789e+06	7.65221e+06	5.47833e+06	4.61312e+06	7.22263e+06	3.52124e+06	5.43326e+06	3.56951e+06	4.14038e+06	5.26173e+06		6.96387e+06	5.20883e+06	4.60122e+06	2.40498e+06	1.56321e+06	895425		0.74798	0.26693	0.660728	0.115169	0.88335	0.52508
2_3_4_5-Tetrahydrodipicolinate	C7 H9 N O4	171.053	10.657	244342	7.74824e+06	1.09413e+07	7.5623e+06	6.05941e+06	5.06702e+06	6.58284e+06	4.0259e+06	6.11698e+06	4.71285e+06	4.22448e+06	5.88587e+06		6.62406e+06	5.43379e+06	5.23504e+06	4.5271e+06	1.12966e+06	912015		0.820312	0.628133	0.790308	0.569484	0.963424	0.793435
Pyridoxine	C8 H11 N O3	169.073	6.142	25740.5	42677.1	38940.3	35740.6	40475	37731.8	37876.6	40019	36372.4	36745.3	39146.8	40197.9		35774.6	39025.6	38115.6	7265.24	1423.84	1854.32		1.09087	0.413597	1.06544	0.555339	0.976682	0.465866
Hexylamine	C6 H15 N	101.12	15.098	5778.92	11583	14127.8	13588.2	11401.3	11861.4	9859.73	11256.2	7480.48	11045.8	12352.9	8085.05		11269.5	11094.7	9741.06	3820.6	862.774	2336.43		0.984487	0.931774	0.864375	0.520341	0.877995	0.318782
Guanine	C5 H5 N5 O	151.049	11.995	138078	321820	379580	415768	273742	349783	250404	597904	362825	315394	238828	257968		313812	367958	293754	123379	159061	56381.7		1.17254	0.609961	0.936083	0.777407	0.798335	0.413006
1-Pyrroline	C4 H7 N	69.0577	13.491	2.42166e+06	3.99561e+06	2.99694e+06	2.14334e+06	3.27575e+06	2.58807e+06	2.4843e+06	2.34771e+06	2.75677e+06	3.65869e+06	2.64884e+06	2.83014e+06		2.88939e+06	2.67396e+06	2.97361e+06	818669	413094	462750		0.925441	0.655043	1.02915	0.863743	1.11206	0.37129
L-N2-(2-Carboxyethyl)arginine	C9 H18 N4 O4	246.132	11.42	16453.1	7548.89	6564.5	12755.2	13575.7	9587.3	11399.5	77506.9	5784.41	13650.7	5691.58	6797.64		10830.4	28017.3	7981.07	4629.09	33033.3	3812.78		2.58691	0.342507	0.736913	0.378684	0.284862	0.273536
3-Butyn-1-al	C4 H4 O	68.026	15.087	38683	57384.3	33969.3	118742	148118	61003.7	27080.6	103540	83745.9	171873	31115.4	82436		62194.7	84935.6	92292.5	39030.8	52466.1	58440.4		1.36564	0.512749	1.48393	0.42457	1.08662	0.857561
Methylenediurea	C3 H8 N4 O2	132.066	14.335	1.28754e+06	112308	745308	718022	1.12113e+06	199660	1.26718e+06	159389	323139	1.9514e+06	1.57405e+06	209481		715794	686839	1.01452e+06	480263	589053	878810		0.95955	0.941743	1.41733	0.572601	1.47708	0.558392
N5-(L-1-Carboxyethyl)-L-ornithine	C8 H16 N2 O4	204.11	11.64	536028	524218	394461	370506	397610	424278	410720	287725	613152	581401	397342	409979		456303	380083	500468	85934.1	62527.4	112651		0.832962	0.201457	1.09679	0.555948	1.31673	0.110872
Gly-Pro(Glycylproline)	C7 H12 N2 O3	172.084	9.725	756051	149881	206236	78786.3	118043	274209	84171.2	164556	317783	211456	172612	329304		297739	160245	257789	309960	82814.3	77707.9		0.538206	0.424292	0.865823	0.810901	1.60872	0.136625
2-Furoate	C5 H4 O3	112.016	4.077	45151.4	556100	1.62336e+06	1.07738e+06	299132	186607	140282	266917	311898	102357	144276	387320		825500	223235	236463	678615	72781	135316		0.270423	0.128031	0.286448	0.13956	1.05926	0.868949
Guanidineacetic acid	C3 H7 N3 O2	117.054	14.905	1.047e+06	1.07353e+06	1.04721e+06	1.8686e+06	1.13211e+06	811658	939878	1.79015e+06	1.14878e+06	2.3279e+06	537556	3.34172e+06		1.25909e+06	1.16845e+06	1.83899e+06	406536	434884	1.24731e+06		0.928012	0.771026	1.46057	0.41068	1.57387	0.349167
Ecgonine	C9 H15 N O3	185.105	4.253	488133	1.72736e+06	761938	947399	972184	443951	915229	877397	1.00246e+06	1.14286e+06	676062	1.01104e+06		981208	802190	958106	532005	241983	198707		0.817554	0.562625	0.976456	0.937804	1.19436	0.357748
2-Aminoacrylate	C3 H5 N O2	87.0318	15.077	137159	150112	112556	117877	82054	100318	89835	125868	134091	104395	80829.4	162675		129426	99518.6	120497	17375.3	19093.7	35574.2		0.768923	0.0596974	0.931015	0.667806	1.2108	0.338757
4-Acetamidobutanoic acid	C6 H11 N O3	145.073	9.138	2.32636e+06	3.76345e+06	3.31208e+06	1.9168e+06	3.09458e+06	2.14202e+06	2.39291e+06	1.05962e+06	3.27135e+06	1.57434e+06	3.24614e+06	3.13404e+06		2.82968e+06	2.17228e+06	2.80647e+06	854656	844248	823582		0.767679	0.31574	0.991798	0.970072	1.29194	0.323522
2_5_6-Trihydroxy-5_6-dihydroquinoline	C9 H9 N O3	179.055	4.066	19782.2	66208.3	57675.4	43676.2	47495.3	28746.9	35700.7	27957.5	10878.8	17026	32071.5	31073		46835.5	34975.1	22762.3	20286.8	9042.84	10485.8		0.746764	0.326604	0.486006	0.0795589	0.650815	0.128179
Isopropylamine	C3 H9 N	59.0734	17.653	947231	256617	359847	351516	418973	270975	504775	160093	534558	324569	163285	312311		478803	338704	333681	315776	153310	152672		0.707397	0.455163	0.696906	0.439616	0.985169	0.964472
L-isoglutamine	C6 H12 N2 O2	144.089	17.589	29163.9	23273.9	13885.9	21120.1	47204.4	17736.3	26535.4	19196	27548	24484.5	24281.4	11008.3		21860.9	27668	21830.6	6310.83	13581.5	7367.96		1.26564	0.467489	0.998611	0.99521	0.789018	0.478495
Capryloylglycine	C10 H19 N O3	201.136	4.217	11603.1	8393.07	7752.17	12917.5	8416.33	5266.98	11497.6	6445.23	17106.8	6399.43	7543.58	12336.7		10166.4	7906.54	10846.6	2490.36	2723.86	4902.31		0.777709	0.266604	1.0669	0.812846	1.37186	0.334798
2_6-Diaminoheptanedioicacid	C7 H14 N2 O4	190.095	18.96	16802.8	21194.4	10918.5	7418.05	16732.9	10539.1	17267.8	9855.41	11296.1	20490.3	7951.27	8599.8		14083.4	13598.8	12084.4	6121.13	3943.73	5788.08		0.965589	0.898459	0.858056	0.651861	0.888635	0.680524
N1-Acetylspermidine	C9 H21 N3 O	187.168	16.464	93122.8	65796.1	31686.6	28607.1	76547.1	93228.8	116037	73203.9	61933.2	318690	124621	46351		54803.1	89754.2	137899	30604.2	19589	125185		1.63776	0.102732	2.51626	0.244668	1.53641	0.476084
2-(3-Carboxy-3-aminopropyl)-L-histidine	C10 H16 N4 O4	256.116	7.764	109366	29973.5	49773.8	45846.3	61909.6	69618.9	61187.7	115580	115676	136079	81292.2	89462		58740	77074	105627	34819.4	25952.6	25045.2		1.31212	0.430844	1.79822	0.0714346	1.37046	0.164429
3-Dehydrocarnitine	C7 H13 N O3	159.089	7.847	1.91904e+06	1.77894e+06	1.73844e+06	1.2336e+06	2.18286e+06	2.04575e+06	2.55289e+06	1.03127e+06	1.50989e+06	1.21971e+06	2.8985e+06	1.91118e+06		1.6675e+06	1.95319e+06	1.88482e+06	299441	650868	732843		1.17133	0.455543	1.13032	0.602814	0.964993	0.893605
2_5-Dioxopiperazine	C4 H6 N2 O2	114.043	11.814	3.55816e+06	2.91536e+06	1.82446e+06	1.45339e+06	3.62367e+06	2.82928e+06	3.14343e+06	2.72372e+06	1.73298e+06	3.52376e+06	3.27963e+06	1.76901e+06		2.43784e+06	3.08003e+06	2.57635e+06	970999	403897	958339		1.26342	0.267785	1.05681	0.845813	0.836469	0.370132
N-Butyryl-L-homoserinelactone	C8 H13 N O3	171.089	4.482	176743	295476	194753	280279	372942	261903	330866	177800	281437	266421	304928	199744		236813	285878	263133	59743.8	85361.3	45132.9		1.20719	0.38264	1.11114	0.508385	0.920437	0.654195
Coformycin	C11 H16 N4 O5	284.111	14.274	8280.04	13819	13018.2	12522.7	8334.14	7082.29	9044.29	7322.11	8678.75	7311.04	8008.57	8683.25		11910	7945.71	8170.4	2478.22	911.434	654.757		0.667145	0.0239252	0.686011	0.0267056	1.02828	0.702698
Nalpha_Nalpha-Dimethyl-L-histidine	C8 H13 N3 O2	183.1	6.364	1.44698e+06	527768	455404	589569	704965	635322	504349	516743	441847	524353	484760	528548		754930	590345	494877	464613	96563.3	40484.8		0.781986	0.513838	0.655527	0.307423	0.838285	0.118042
Pyridoxamine	C8 H12 N2 O2	168.087	18.998	315884	1.3296e+06	1.61338e+06	747559	889460	710682	1.11521e+06	799007	838681	786278	1.02019e+06	934922		1.0016e+06	878590	895019	582121	173813	103697		0.877183	0.699539	0.893585	0.730809	1.0187	0.876365
Guanidinosuccinic acid	C5 H9 N3 O4	175.059	15.427	1.17767e+06	1.52452e+06	2.40493e+06	1.3317e+06	135395	106955	96024.2	147895	211012	120747	106727	198481		1.6097e+06	121567	159242	548810	24154.7	53102.3		0.0755216	0.00163604	0.0989262	0.00189909	1.30991	0.244017
6-Hydroxypseudooxynicotine	C10 H14 N2 O2	194.105	4.836	213884	407363	251241	251165	378681	258684	270586	212724	230503	277384	238190	231448		280913	280169	244381	86115.8	70254	22266.4		0.99735	0.989747	0.869953	0.442812	0.872264	0.368959
3-hydroxy-1H-quinolin-4-one	C9 H7 N O2	161.049	12.451	1.42355e+06	1.2663e+06	969115	1.10015e+06	1.01291e+06	686857	1.18304e+06	877682	681229	730449	1.06514e+06	1.34122e+06		1.18978e+06	940120	954511	197676	210037	309124		0.790164	0.13414	0.80226	0.247025	1.01531	0.941117
gamma-Glutamyl-gamma-aminobutyraldehyde	C9 H16 N2 O4	216.11	6.787	33005.1	101140	47472.4	44742.8	44258.6	38929.6	33826.7	41188.5	31779	14374.9	81209.8	41762.1		56590.1	39550.8	42281.4	30355.8	4396.82	28312.3		0.698901	0.30908	0.747153	0.516327	1.06904	0.85512
L-Homocitrulline	C7 H15 N3 O3	189.111	7.779	63020.6	31643.7	22642.4	18974.4	28919.9	17435.7	21633.6	15665.9	21378.8	13731.8	27375.4	20940		34070.3	20913.8	20856.5	20020.7	5895	5583.84		0.613842	0.254199	0.612161	0.25062	0.997262	0.989204
Hexamethylenetetramine	C6 H12 N4	140.106	7.298	67880.4	29165.2	41715	57568.7	44697.9	40902.4	38032.6	36438.2	40397.7	24110.2	19399.5	33870.2		49082.3	40017.8	29444.4	17091.5	3625.85	9467.8		0.81532	0.339444	0.599898	0.0911334	0.735782	0.0820708
2-Amino-4-methylpyrimidine	C5 H7 N3	109.064	13.794	301958	1.28724e+06	865738	1.04159e+06	769018	850462	859824	1.11134e+06	951117	727534	932651	1.14568e+06		874130	897661	939247	418789	148175	170903		1.02692	0.919085	1.07449	0.783093	1.04633	0.725717
2-(Acetamidomethylene)succinate	C7 H9 N O5	187.047	15.073	813927	864574	889649	892921	796522	732709	877313	674224	953267	577949	516396	870627		865268	770192	729560	36494.1	87145.7	214763		0.89012	0.0908208	0.84316	0.259231	0.947244	0.737852
Imidazoleaceticacid	C5 H6 N2 O2	126.044	5.997	1.35806e+06	1.08264e+06	1.5569e+06	1.1366e+06	1.11377e+06	939582	1.16737e+06	1.35521e+06	881682	1.02884e+06	1.30249e+06	1.14813e+06		1.28355e+06	1.14398e+06	1.09029e+06	217738	171132	178574		0.891266	0.352401	0.849431	0.21897	0.953061	0.679317
Salsolinol	C10 H13 N O2	179.094	5.689	15071	18775.6	17612.1	16220.6	15576.8	17622.8	16214.1	17516.3	15207.4	16113.1	15652.2	18491.3		16919.8	16732.5	16366	1615.61	1001.86	1464.33		0.988929	0.850276	0.967268	0.6296	0.978097	0.693877
?-(Methylenecyclopropyl)glycine	C6 H9 N O2	127.063	17.644	2934.66	19625.6	11020.8	25869.5	8604.98	14204.7	13077.7	22556.5	15746.3	3527.04	17877.2	16422.9		14862.6	14611	13393.4	10014.5	5822.93	6637.35		0.983068	0.966756	0.901143	0.814927	0.916664	0.79195
4,4'-Methylenedianiline	C13 H14 N2	198.115	40.556	414777	562170	616114	806653	599057	618734	717091	715249	555968	500335	661735	569940		599928	662533	571995	161971	62458.4	66956.4		1.10435	0.497876	0.953438	0.760712	0.863345	0.0953449
5-Valerolactone	C5 H8 O2	100.052	15.176	14749.9	31905.8	1.3999e+06	17836.4	24997.7	21848.1	25061.5	26138.6	32263.1	30006.3	2.4214e+06	1.67021e+06		366098	24511.5	1.03847e+06	689241	1851.15	1.20292e+06		0.0669533	0.359866	2.83659	0.369525	42.3667	0.142806
N2-(D-1-Carboxyethyl)-L-lysine	C9 H18 N2 O4	218.126	9.188	646724	1.12292e+06	576198	717288	742023	586344	710714	683484	640877	637546	794957	635005		765781	680641	677096	244958	67261	78610.7		0.888819	0.52759	0.88419	0.516302	0.994792	0.947593
Linamarin	C10 H17 N O6	247.105	13.073	656029	574894	753195	369059	701206	1.06827e+06	1.68148e+06	654374	1.00535e+06	444291	1.09224e+06	1.02777e+06		588294	1.02633e+06	892413	163324	474354	301010		1.74459	0.131367	1.51695	0.126062	0.869517	0.650408
Ala-Pro(Alanyl-Proline)	C8 H14 N2 O3	186.1	4.395	1.33911e+06	1.82406e+06	1.391e+06	973753	1.1109e+06	959875	934066	882327	1.00447e+06	1.2084e+06	742068	1.04934e+06		1.38198e+06	971792	1.00107e+06	348330	98184.1	193569		0.703189	0.0639451	0.724373	0.104459	1.03013	0.796376
2'-Deoxymugineicacid	C12 H20 N2 O7	304.126	7.145	1.61341e+06	1.17458e+06	913385	867464	469983	502388	524876	443081	492206	327424	390997	469734		1.14221e+06	485082	420090	342014	35940.2	75495.1		0.424688	0.00874395	0.367788	0.00619209	0.866019	0.171043
N-Benzylformamide	C8 H9 N O	135.068	13.919	11446.3	10809	29001.7	45217	7772.13	7056.99	7488.67	8312.03	7736.46	9679.47	7698.11	22293.3		24118.5	7657.46	11851.8	16398.4	526.205	7022.18		0.317493	0.0915841	0.4914	0.218183	1.54775	0.27853
3-(3_4-Dihydroxypyridin-1-yl)-L-alanine	C8 H12 N2 O4	200.079	6.186	63307.6	737629	986720	1.00707e+06	769728	690464	950118	593373	671501	584250	853205	558314		698681	750921	666818	440940	151117	133357		1.07477	0.830078	0.954395	0.894502	0.888	0.435916
(R)-1-Aminopropan-2-ol	C3 H9 N O	75.0683	9.672	218876	244653	663204	346653	245850	183029	165104	348937	232232	817133	312204	666656		368347	235730	507056	204168	83033.4	279950		0.639968	0.27415	1.37657	0.45386	2.151	0.112477
17-O-Acetylnorajmaline	C21 H26 N2 O3	354.193	5.68	17137.2	21310.8	20778.6	18289.1	17852	18568.2	18394.8	19825.8	17408.9	28756.9	17991.9	20977.4		19378.9	18660.2	21283.8	1991.99	834.814	5221.5		0.962911	0.530439	1.0983	0.520857	1.1406	0.359356
1-Methylnicotinamide	C7 H8 N2 O	136.063	20.238	20400.9	302505	391009	214993	250000	424836	274255	309538	382744	622053	256365	245889		232227	314657	376763	158449	77413.6	174954		1.35495	0.385944	1.62239	0.266595	1.19738	0.540219
Hypotaurine	C2 H7 N O2 S	109.019	13.957	4.77245e+06	4.22514e+06	4.23982e+06	2.63974e+06	1.96265e+06	2.90604e+06	1.62334e+06	1.30846e+06	2.23018e+06	2.97443e+06	2.3035e+06	1.6514e+06		3.96929e+06	1.95012e+06	2.28988e+06	922210	691000	541606		0.491303	0.0127583	0.576899	0.0200531	1.17422	0.468343
L-5-Hydroxytryptophan	C11 H12 N2 O3	220.084	12.202	49789.6	42896.4	31917.3	39498.5	91026.1	62595.5	97817.4	67046.9	97482.3	55947.9	93481.8	112088		41025.4	79621.5	89749.9	7429.66	17408.5	23911.4		1.94078	0.00651469	2.18767	0.00805924	1.12721	0.518985
gamma-L-Glutamyl-L-cysteinyl-beta-alanine	C11 H19 N3 O6 S	321.098	13.407	196931	322159	321214	367254	325252	487577	528200	360846	555283	378094	532748	666102		301889	425469	533057	73196.4	97691.2	118615		1.40935	0.0893149	1.76573	0.0160633	1.25287	0.21096
5-Hydroxykynurenamine	C9 H12 N2 O2	180.088	5.386	14942.3	14834.5	14035.6	13750.5	13868.8	13091.8	12694.6	12760.7	13060.5	14267.4	12513.2	13621		14390.7	13104	13365.5	587.985	538.665	752.357		0.910583	0.0179709	0.928757	0.0753759	1.01996	0.592371
2-Aminomuconate	C6 H7 N O4	157.037	11.802	553764	1.35446e+06	2.01278e+06	1.32754e+06	1.49278e+06	1.55304e+06	1.48154e+06	1.16538e+06	1.20243e+06	1.20169e+06	1.75861e+06	1.30357e+06		1.31214e+06	1.42319e+06	1.36657e+06	596675	174713	265701		1.08463	0.733145	1.04149	0.873092	0.96022	0.733972
Ethionine	C6 H13 N O2 S	163.066	5.809	540275	733400	605984	367772	301643	324285	353725	292101	304462	388991	594698	285451		561858	317939	393400	152216	27411.2	141543		0.56587	0.0197101	0.700177	0.156164	1.23735	0.335509
L-Carnitinamide	C7 H16 N2 O2	160.121	20.125	466144	760093	406719	346294	626035	306700	331959	557662	358874	686391	306713	310273		494812	455589	415563	183497	160128	182113		0.920731	0.758297	0.839839	0.562323	0.912144	0.752535
2-Methylcholine	C6 H15 N O	117.113	9.901	444560	601833	166155	368730	567523	463611	591946	362898	455835	493537	267338	154495		395319	496495	342801	181012	105016	159846		1.25593	0.370917	0.86715	0.678802	0.690443	0.159135
1_6_6-Trimethyl-2_7-dioxabicyclo[3.2.2]nonan-3-one	C10 H16 O3	184.11	4.261	46978	54829.2	53923.4	56889.8	53874.8	44199.4	60033.3	36699.8	48705.1	46412.2	36534.6	55698.1		53155.1	48701.8	46837.5	4301.05	10319.6	7923.15		0.916221	0.456011	0.881148	0.210605	0.96172	0.784065
Methylimidazoleacetaldehyde	C6 H8 N2 O	124.063	8.297	959695	240318	170664	209971	254867	381606	144515	234005	243796	163656	234367	297345		395162	253748	234791	377434	97759.1	54937.9		0.642137	0.495511	0.594164	0.432615	0.925292	0.746803
3-hydroxy-2-methyl-1H-quinolin-4-one	C10 H9 N O2	175.063	4.005	1692	3354.88	5619.24	1585.44	2245.19	2118.76	3003.06	2788.71	1205.27	1235.7	5306.93	3828.17		3062.89	2538.93	2894.02	1887.01	424.516	2024.57		0.828934	0.60748	0.944866	0.906858	1.13986	0.743074
N-alpha-Acetylarginine	C8 H16 N4 O3	216.121	14.108	142293	109586	175987	46310.7	487540	342647	444430	355255	805093	592253	312415	498157		118544	407468	551979	55261.7	70013.5	204920		3.43727	0.000642512	4.65632	0.00647011	1.35466	0.230398
3-(2-Naphthyl)-L-alanine	C13 H13 N O2	215.098	4.643	281840	519954	564461	601009	912185	614047	468669	357331	665730	464201	325497	882171		491816	588058	584400	143854	240293	242735		1.19569	0.517571	1.18825	0.536005	0.993779	0.983605
Cytosine	C4 H5 N3 O	111.043	9.519	335451	864186	521237	784699	869735	364319	377189	440239	748657	557247	471401	470762		626393	512871	562017	243113	240211	130889		0.818768	0.531167	0.897226	0.65744	1.09583	0.731669
N-Carbamoylputrescine	C5 H13 N3 O	131.108	14.51	178610	127009	8167.72	151461	16177.7	12051.3	265605	18019.1	15794.2	27315.7	15404	536320		116312	77963.3	148708	75113.6	125119	258467		0.670295	0.618043	1.27853	0.817785	1.90741	0.639717
Acetoneoxime	C3 H7 N O	73.0526	13.547	522670	1.17787e+06	664085	708787	461840	503812	539212	394851	673166	290367	462024	639329		768354	474929	516222	284305	62049.1	176762		0.618112	0.0903139	0.671854	0.18271	1.08695	0.674768
4-Guanidinobutanal	C5 H11 N3 O	129.09	11.303	15970.4	19902.4	8473.17	11428.9	8581.72	9067.24	14191.9	15211	14169.6	12968.2	12206.8	10931.5		13943.7	11763	12569	5028.74	3424.25	1358.18		0.843603	0.500381	0.901409	0.616555	1.06852	0.676984
allylcysteine	C6 H11 N O2 S	161.05	13.97	4855.06	8617.61	7059.61	6367.02	6006.02	4803	6120.51	7317.61	5337.76	8154.74	7467.12	6961.53		6724.83	6061.78	6980.29	1561.92	1027.65	1199.25		0.901404	0.504775	1.03799	0.803956	1.15152	0.288926
3-Methyl-quinolin-2-ol	C10 H9 N O	159.068	4.501	5156.47	2565.13	2871.13	1831.6	2072.44	1968.5	2314.06	2157.22	1439.61	1796.03	2069.6	1769.52		3106.08	2128.05	1768.69	1434.83	146.058	257.936		0.685125	0.223831	0.569428	0.116218	0.83113	0.0515319
Cytidine	C9 H13 N3 O5	243.085	10.96	243112	1.92775e+06	1.13635e+06	1.56474e+06	2.37422e+06	1.30969e+06	1.38017e+06	661652	1.95766e+06	1.39937e+06	1.29291e+06	1.38984e+06		1.21799e+06	1.43143e+06	1.50995e+06	725960	706838	302329		1.17524	0.688202	1.23971	0.485814	1.05485	0.844905
Deoxycytidine	C9 H13 N3 O4	227.09	11.357	49882.6	7649.06	12694.9	32352.1	27048.3	28856.5	5772.94	11834.2	35150.7	10276.3	11607.4	6829.9		25644.7	18378	15966.1	19356.4	11353.1	12947.2		0.716638	0.541183	0.622589	0.437664	0.868763	0.788788
Diethyl(2R_3R)-2-methyl-3-hydroxysuccinate	C9 H16 O5	204.099	3.813	12225.9	3411.8	2626.84	2275.05	2439.15	2409.92	3936.7	2755.97	2412.63	2752.05	2088.68	3333.41		5134.89	2885.44	2646.69	4751.14	718.148	531.93		0.561927	0.385268	0.515433	0.338033	0.917259	0.612351
8-Hydroxyquinoline	C9 H7 N O	145.053	12.855	10414.6	14484.6	8209.86	7352.58	9601.81	9111.93	8109	6716.48	8363.03	7129.12	8499.91	8272.62		10115.4	8384.8	8066.17	3185.57	1273.99	631.65		0.828913	0.351988	0.797414	0.253783	0.961999	0.669771
Guanidinoethyl sulfonate	C3 H9 N3 O3 S	167.036	14.469	174039	303150	301257	278926	623516	537846	489915	533656	530594	367951	699730	463792		264343	546234	515517	61199.4	55895.4	139777		2.06638	0.000494568	1.95018	0.0165685	0.943766	0.697369
1,5-Dimethyl-2-phenyl-4-(1,4-thiazinan-4-ylmethyl)-2,3-dihydro-1H-pyrazol-3-one	C16 H21 N3 O S	303.142	11.674	448212	29843.8	20971.9	27199.8	22565.6	27760	19190.8	30237.2	17282.4	17442.6	15411.7	25286.9		131557	24938.4	18855.9	211136	4990.15	4385.34		0.189564	0.351624	0.143329	0.326871	0.7561	0.116798
Methyl indole-3-acetate	C11 H11 N O2	189.082	10.643	4898.88	538060	763638	642434	421396	334243	593740	312441	502708	267267	320888	377014		487258	415455	366969	334523	127839	100978		0.852639	0.70231	0.753132	0.516872	0.883295	0.573427
Phosphocreatine	C4 H10 N3 O5 P	211.035	15.71	14085.3	8485.36	3669.38	3001.92	5685.47	3460.96	5357.81	2538.19	3454.28	3419.85	4269.55	3242.57		7310.48	4260.61	3596.57	5134.83	1510	458.145		0.582808	0.297871	0.491974	0.199707	0.844144	0.432248
5-Guanidino-2-oxopentanoate	C6 H11 N3 O3	173.08	13.49	138904	201224	221821	98430.5	305697	294191	280545	196728	481524	410541	218668	379119		165095	269290	372463	56725.5	49455.2	111118		1.63112	0.0324631	2.25605	0.0159193	1.38313	0.140707
L-Glutamyl1-phosphate	C5 H10 N O7 P	227.018	3.902	6229.95	3264.73	5854.67	2717.85	12830.2	3147.76	3834.05	2988.35	6796.71	3042.43	4822.66	2637.81		4516.8	5700.08	4324.9	1782.2	4767.53	1901.63		1.26197	0.658351	0.957515	0.887751	0.758744	0.61134
N-Acetylglycine	C4 H7 N O3	117.042	3.971	265024	508953	614411	549241	463249	548454	711219	511655	484256	764000	959846	677797		484407	558644	721474	152573	107535	197323		1.15325	0.456674	1.4894	0.106041	1.29147	0.197465
L-Tyrosine methyl ester	C10 H13 N O3	195.089	6.043	31003.8	46459.8	43307.7	37980.3	42239.1	39376.3	39963.4	41763.2	38941.2	38346.8	40853	41949.9		39687.9	40835.5	40022.7	6764.88	1380.9	1671.48		1.02892	0.750877	1.00844	0.926578	0.980096	0.481749
Leucinamide	C6 H14 N2 O	130.11	4.739	42683.2	33886.6	22018.1	12514.9	11681.7	19297.6	19789.1	16086	21447.5	12488.7	18651.1	11059.8		27775.7	16713.6	15911.8	13236.5	3734.95	4946.63		0.601734	0.158821	0.572867	0.144122	0.952027	0.804499
L-Formylkynurenine	C11 H12 N2 O4	236.079	11.074	7696.09	8751.49	6311.41	5300.6	6235.33	6658.17	6024.82	6129.37	6340.82	7672.86	8036.55	6959.92		7014.9	6261.92	7252.54	1518.06	277.793	754.585		0.89266	0.366839	1.03388	0.78862	1.1582	0.0488586
N-Acetyl-L-citrulline	C8 H15 N3 O4	217.105	10.891	111970	245155	273599	127850	516956	340728	416766	182928	501371	370568	382805	250178		189643	364345	376231	81612.3	140840	102672		1.92121	0.0754703	1.98388	0.0293638	1.03262	0.895972
Acetaldehydeoxime	C2 H5 N O	59.037	15.075	1.1966e+06	546320	301256	522631	490754	406667	465066	560818	603238	437731	353990	465176		641701	480826	465034	386044	63888.6	103564		0.749299	0.442366	0.724689	0.410709	0.967155	0.803877
4-Pyridoxic acid	C8 H9 N O4	183.053	4.334	66020.8	113114	85598.3	93397.3	35209.1	10921.2	34088.2	29840.4	13085.5	22901.9	41547.3	8322.03		89532.6	27514.7	21464.2	19487.6	11301.4	14700.5		0.307315	0.00150647	0.239736	0.00141047	0.780097	0.538192
Diisobutylphthalate	C16 H22 O4	278.151	39.21	57759.5	2777.86	34725.8	37231	26816	21308.3	29684.3	31593.2	50007.6	25981.5	55275.1	29639.7		33123.5	27350.4	40226	22710	4481.1	14573.2		0.82571	0.635675	1.21442	0.617476	1.47076	0.142187
Triethylene glycol monobutyl ether	C10 H22 O4	206.151	3.847	57750.1	51955.5	40174.4	47223.3	54687.3	41666.7	39955.8	36524.7	31143.8	46510.5	45947.8	45314.5		49275.8	43208.6	42229.2	7439.61	7945.52	7406.39		0.876873	0.307586	0.856995	0.227991	0.977332	0.862818
N1-Methyl-2-pyridone-5-carboxamide	C7 H8 N2 O2	152.058	5.39	392437	402726	317689	231195	120662	50465.8	121947	152356	27114.9	50598.5	206298	30271.6		336012	111358	78570.9	79491.7	43156.3	85785.2		0.33141	0.00253339	0.233834	0.00455625	0.705571	0.520179
N6,N6,N6-Trimethyl-L-lysine	C9 H20 N2 O2	188.152	19.131	685691	581520	462939	449612	373591	283777	472150	426258	296759	356961	377228	361241		544940	388944	348047	110997	80852.7	35286.9		0.713737	0.0634954	0.638688	0.0148395	0.894851	0.389601
1-deoxynojirimycin	C6 H13 N O4	163.084	13.9	590141	356397	344064	330362	573037	432005	446287	487654	381347	591275	767184	372459		405241	484746	528066	123725	63415.3	188779		1.19619	0.296314	1.30309	0.318217	1.08937	0.678731
Hexanoylglycine	C8 H15 N O3	173.105	11.58	1.07808e+06	673374	888668	517064	994267	798583	882571	214438	787981	213356	1.15883e+06	920361		789298	722465	770133	245507	348040	401653		0.915327	0.764276	0.97572	0.937754	1.06598	0.863542
Thiomorpholine3-carboxylate	C5 H9 N O2 S	147.035	12.65	65282.9	7384.25	7186.62	8545.44	7559.11	7823.81	10585.3	11229.9	10910.2	14374.6	9748.65	9519.37		22099.8	9299.53	11138.2	28795	1878.5	2241.83		0.420797	0.409134	0.503996	0.476569	1.19772	0.255371
N2-Acetyl-L-aminoadipate	C8 H13 N O5	203.079	15.97	280486	329497	316284	269338	198264	245520	225700	337240	312513	276682	222946	228461		298901	251681	260150	28585.6	60240.3	42440.2		0.84202	0.206432	0.870355	0.180644	1.03365	0.825829
delta-Guanidinovalericacid	C6 H13 N3 O2	159.1	14.327	25094.4	16906.3	44533.2	11505.5	149865	82215.7	40957.2	21095.6	308232	99752.3	23319.4	32617.2		24509.8	73533.3	115980	14470.7	56899.8	132614		3.00015	0.145959	4.73198	0.219338	1.57725	0.577793
Imidazol-5-yl-pyruvate	C6 H6 N2 O3	154.035	12.128	348813	228975	136666	106101	47092.9	135465	124273	204512	59799.3	94835.7	278968	75998.6		205139	127836	127401	109098	64471.1	102055		0.623166	0.268228	0.621045	0.338105	0.996597	0.994482
Phenylacetylglycine	C10 H11 N O3	193.073	5.276	10687	8732.62	6605.72	8682.1	7313.5	7624.56	7371.13	7295.36	7464.64	7874.56	7402.95	7850.92		8676.87	7401.14	7648.27	1666.69	152.412	249.116		0.852973	0.178225	0.881455	0.267976	1.03339	0.141511
Metanephrine	C10 H15 N O3	197.107	41.101	12085.4	17058.8	23685.7	23951.6	2084.37	11620.3	2527.52	15529.1	14229.7	22524.8	2155.61	2971.2		19195.4	7940.32	10470.3	5712.6	6701.3	9743.61		0.413658	0.0431235	0.545461	0.173307	1.31863	0.683668
N3,N4-Dimethyl-L-arginine	C8 H18 N4 O2	202.142	17.517	575771	733661	424498	620118	360534	260205	347724	168669	393439	332650	412092	346593		588512	284283	371194	127971	89041.7	37675.3		0.483053	0.00795769	0.630732	0.0172899	1.30572	0.12232
2_6-Dihydroxypseudooxynicotine	C10 H14 N2 O3	210.1	4.024	280987	134485	52592.4	89504.8	112922	131704	72917.8	65222.2	94773.3	85764.8	77771.2	112742		139392	95691.4	92762.7	100160	31837	15021.3		0.68649	0.437461	0.66548	0.392671	0.969395	0.873317
Caprolactam	C6 H11 N O	113.084	4.376	24782.3	61771	49399.9	54925.9	46550.4	63250.5	43826.8	45380.8	53734	51812.8	53592.1	70499.5		47719.8	49752.1	57409.6	16107.1	9067.78	8770.29		1.04259	0.83324	1.20306	0.331333	1.15391	0.270356
1-phenylpropane-1_2-dione	C9 H8 O2	148.052	2.753	9.64476e+06	2.49336e+07	1.13121e+07	1.22277e+07	9.91527e+06	8.91035e+06	9.18721e+06	7.81091e+06	1.2909e+07	7.22731e+06	7.29969e+06	8.30422e+06		1.45296e+07	8.95594e+06	8.93506e+06	7.01797e+06	873111	2.69451e+06		0.616394	0.166043	0.614957	0.187215	0.997669	0.988718
2-MethylpropanalO-methyloxime	C5 H11 N O	101.084	1.467	7.34054e+07	1.30633e+08	1.36101e+08	1.06193e+08	9.08653e+07	1.36804e+08	2.00765e+08	6.71717e+07	1.62023e+07	5.08587e+07	1.06355e+08	8.06029e+07		1.11583e+08	1.23901e+08	6.35048e+07	2.85808e+07	5.88333e+07	3.88413e+07		1.1104	0.719385	0.569126	0.093202	0.512543	0.137468
Histamine	C5 H9 N3	111.079	5.678	53956.2	108232	27429.8	71867.5	113156	28062.9	101827	66651.8	38487.5	21677.4	110744	33616.2		65371.4	77424.4	51131.3	33907.2	38405	40364.4		1.18438	0.654591	0.782166	0.608474	0.660403	0.381691
2-keto-4-methylthiobutyricacid(KMBA)	C5 H8 O3 S	148.019	5.044	172309	32014	17084.5	19003.5	66002.1	40384.2	32386.7	44346.1	97517.9	100811	37781.9	49038.5		60102.8	45779.8	71287.4	75097.8	14369.9	32544		0.761691	0.720803	1.18609	0.793782	1.55718	0.201564
1-Methylpyrrolinium	C5 H9 N	83.0734	6.087	1.26703e+06	2.45463e+06	1.09172e+06	1.40987e+06	1.35095e+06	1.17669e+06	1.45318e+06	988296	1.3003e+06	1.3034e+06	1.24838e+06	896623		1.55581e+06	1.24228e+06	1.18718e+06	613178	204205	195339		0.798478	0.369391	0.763059	0.295571	0.955643	0.71001
2-Hydroxymethylserine	C4 H9 N O4	135.054	2.895	455043	16546.1	10925.9	4384.48	12222.3	9798.83	11828.9	11509.4	10801.1	7347.26	11034.9	10844.3		121725	11339.9	10006.9	222268	1067.93	1776		0.0931598	0.35894	0.0822092	0.353592	0.882453	0.245698
1_2-Diaminobenzene	C6 H8 N2	108.069	5.52	10450.4	8429.2	14197	14045.1	21819.2	4765.13	17392.3	23346.3	7463.44	8443.06	19304	9935.89		11780.4	16830.7	11286.6	2826.54	8430.73	5440.76		1.42871	0.299311	0.958083	0.877319	0.670595	0.311457
Phosphonomycin	C3 H7 O4 P	138.01	7.727	1.50739e+06	411853	263256	226053	355902	175574	231362	185831	184434	185837	115942	107854		602138	237167	148516	608817	82786.3	42416.2		0.393875	0.279716	0.246648	0.187681	0.626209	0.105281
2-methylhistamine	C6 H11 N3	125.095	5.643	12651.1	14249.6	9731.54	5268.04	2447.23	1545.2	1729.49	1635.49	2040.88	2116.86	5738.11	8474.78		10475.1	1839.35	4592.66	3943.26	412.175	3110.42		0.175594	0.00478994	0.438438	0.0576473	2.49689	0.129784
Indole;1-Benzazole	C8 H7 N	117.058	2.786	35655.1	69386.4	34358.7	37124.3	33905.3	31906.5	32107.9	20133.3	32822.5	20794.2	29903.4	27720.3		44131.1	29513.3	27810.1	16874.7	6317.5	5123.08		0.668763	0.155814	0.63017	0.11364	0.942292	0.689947
Thiamine	C12 H16 N4 O S	121.061	3.815	243951	2.93935e+06	1.37766e+06	1.56614e+06	1.20846e+06	881783	1.64838e+06	1.5514e+06	1.13528e+06	973189	1.01013e+06	1.12715e+06		1.53178e+06	1.32251e+06	1.06144e+06	1.10525e+06	349205	82038		0.86338	0.730404	0.692945	0.428567	0.802595	0.195752
Gabaculine	C7 H9 N O2	139.061	3.743	998643	1.23004e+06	473231	605936	1.02475e+06	731520	1.08118e+06	705267	1.00207e+06	693788	964484	814691		826962	885681	868759	349249	194830	141979		1.07101	0.778916	1.05054	0.831878	0.980894	0.892948
Iminoglycine	C2 H3 N O2	73.0163	7.924	542926	720430	626502	598747	275285	305013	323650	217964	324706	187483	335507	311659		622151	280478	289839	74166.5	46191	68930.1		0.45082	0.000230653	0.465866	0.000598964	1.03337	0.828977
2-Aminophenol	C6 H7 N O	109.053	1.916	8815.35	13324	6556.79	5881.36	8652.4	7572.64	6034.19	8702.35	10230.7	4851.94	9979.74	13825.9		8644.36	7740.4	9722.07	3362.54	1251.18	3691.64		0.895427	0.632284	1.12467	0.681079	1.25602	0.348488
Homoarginine	C7 H16 N4 O2	188.127	4.429	61672.7	168360	118592	150820	54063.9	46779.4	72118	53269.9	52530.8	46364.5	49949.6	54479.1		124861	56557.8	50831	46897.5	10874.5	3508.29		0.452965	0.0296603	0.4071	0.0198572	0.898745	0.354859
Prenyl-L-cysteine	C8 H15 N O2 S	189.079	2.725	67489.1	125624	55579.5	53668.7	44946.7	37781.9	40989.9	37675.9	59287.5	33193.6	42923.9	33369.2		75590.3	40348.6	42193.6	33911.5	3429.53	12269.3		0.53378	0.0841316	0.558188	0.113453	1.04573	0.781837
6-Imino-5-oxocyclohexa-1_3-dienecarboxylate	C7 H5 N O3	151.028	7.058	278178	691829	416825	311696	443822	488147	421554	554910	492993	325845	297427	408978		424632	477108	381311	187669	58791.3	88225.5		1.12358	0.61275	0.89798	0.690626	0.799212	0.120748
5-Hydroxymethyl-2-furaldehyde	C6 H6 O3	144.042	4.418	1.55203e+06	1.59964e+06	2.07713e+06	1.66126e+06	1.12097e+06	1.16006e+06	1.13948e+06	963027	936992	853979	1.34789e+06	1.08363e+06		1.72251e+06	1.09588e+06	1.05562e+06	240600	89998.9	216745		0.636212	0.00276973	0.612837	0.00622484	0.96326	0.743211
Nicotianamine	C12 H21 N3 O6	303.142	3.675	3008.28	4678.53	2758.3	2654.64	1264.54	1389.07	2845.03	2079.1	4226.3	1896.39	3013.88	2439.81		3274.94	1894.43	2894.1	947.431	727.986	998.481		0.578464	0.0602015	0.883711	0.600009	1.52768	0.156793
4-Hydroxy-2-butynal	C4 H4 O2	84.021	5.89	667890	958053	675061	659111	388993	272767	411880	400825	599675	268607	437953	416546		740029	368616	430695	145496	64579.4	135498		0.498111	0.0034441	0.581998	0.0208032	1.16841	0.439796
Bis(2-ethylhexyl)phthalate	C24 H38 O4	390.276	1.061	203403	270627	314143	319243	119047	67558.3	165470	187505	121443	266681	118418	172916		276854	134895	169865	53606.6	53191.5	69219.8		0.487242	0.00940296	0.613553	0.0501934	1.25924	0.453584
Pantothenicacid(VitaminB5)	C9 H17 N O5	219.11	1.557	1.04388e+06	1.21356e+06	942810	1.0194e+06	1.12321e+06	1.01807e+06	1.5323e+06	1.20191e+06	904297	1.30514e+06	1.43592e+06	986934		1.05491e+06	1.21887e+06	1.15807e+06	114192	222110	253324		1.15542	0.237158	1.09779	0.485829	0.950118	0.730518
1-Methylguanine	C6 H7 N5 O	165.063	4.545	5050.9	23944.6	48999.4	133758	27882.7	205462	182280	204310	339371	126964	186409	266486		52938.2	154984	229807	56807.3	85402.8	92753.7		2.92763	0.0937467	4.34105	0.0174171	1.48278	0.280127
Butyryl-L-carnitine	C11 H21 N O4	231.146	1.335	477301	15182.8	11787.8	9782.59	30185.3	16445.5	25017.2	9462.69	15124.3	31890.6	24478.1	11668.1		128514	20277.7	20790.3	232536	9170.11	9167.58		0.157786	0.388164	0.161775	0.390273	1.02528	0.93955
Ipronidazole-OH	C7 H11 N3 O3	203.09	4.559	324981	2580.36	2582.63	3386.6	3866.65	17834	4682.19	3735.71	44008.1	4224.85	1343.67	8501.73		83382.6	7529.64	14519.6	161066	6882.32	19877.7		0.0903023	0.383016	0.174132	0.428628	1.92833	0.531012
Bis-D-fructose2'_1:2_1'-dianhydride	C12 H20 O10	324.104	4.41	317209	148786	125186	129502	96500.6	128732	116606	100136	89101.1	52410.4	98891	136970		180171	110494	94343	91932.9	14978.6	34754.1		0.613272	0.185264	0.523631	0.131316	0.853832	0.426123
Pyridine	C5 H5 N	79.0421	1.412	58260.5	40655	25647.5	23725.3	23230.7	23179.2	27521.9	23232.8	22886.3	16656.4	20789.3	19098.2		37072.1	24291.2	19857.6	16025.5	2153.95	2637.3		0.655241	0.164992	0.535647	0.0782958	0.817481	0.04044
1-Phenylethylamine	C8 H11 N	121.089	1.333	295610	2928.34	2078.91	2469.56	3403.61	3436.61	1707.98	1828.83	4521.55	3004.63	3132.16	2587.97		75771.7	2594.26	3311.58	146559	954.986	839.453		0.0342378	0.35655	0.0437047	0.360944	1.2765	0.302272
2-Methylpropanamine	C4 H11 N	73.0891	1.542	141271	66399.2	93650.8	38958.5	11553.3	51197.2	56985.4	48274.6	51823	42456.3	32131.6	33533.8		85069.9	42002.6	39986.2	43616	20619.7	9120.28		0.493743	0.124447	0.470039	0.0894612	0.951992	0.863927
4-Fluoro-N-(1H-indol-5-yl)benzamide	C15 H11 F N2 O	254.089	3.864	252820	1544.99	1090.75	769.208	1206.64	958.29	1895.32	800.477	780.679	1703.44	1314.43	1165.16		64056.2	1215.18	1240.93	125843	483.266	381.615		0.0189705	0.356492	0.0193724	0.356673	1.02119	0.936081
Homocysteine	C4 H9 N O2 S	135.035	3.912	10787.4	26231.1	11229.8	17430.3	28951.4	14712	20336.6	164715	41882.8	16656.8	11964.1	33211.2		16419.6	57178.7	25928.7	7209.76	71929.6	14006.5		3.48234	0.302531	1.57913	0.272762	0.453467	0.426452
Glycerophospho-N-palmitoyl ethanolamine	C21 H44 N O7 P	453.284	1.599	113623	326060	218100	137848	94496	105175	122074	71387.6	185426	94002.1	107117	99430		198908	98283.2	121494	95808.5	21222.9	42959.6		0.494115	0.0861442	0.610804	0.190771	1.23616	0.370063
2-Hydroxyphenethylamine	C8 H11 N O	137.084	1.348	197154	2065.24	989.656	1340.63	1827.87	1067.14	1333.14	787.63	2683.56	854.97	575.037	1475.08		50387.3	1253.94	1397.16	97845.2	442.724	936.44		0.0248861	0.354004	0.0277285	0.355323	1.11421	0.791419
Mercaptoethanol	C2 H6 O S	78.0138	1.337	25227.9	33642.4	15913.5	15196.6	21883.2	20234.4	7187.57	8543.23	7596.29	4315.86	24629.4	20087.9		22495.1	14462.1	14157.4	8723.8	7666.92	9742.3		0.642901	0.215838	0.629353	0.249406	0.978927	0.962383
Biotinamide	C10 H17 N3 O2 S	243.103	4.394	53872.4	53953.5	19699.5	15590.6	86084.6	117761	96015.5	84413.4	122578	44697.5	74177.4	28887.7		35779	96068.5	67585.2	21006.4	15341.4	41186.6		2.68505	0.00355715	1.88896	0.218012	0.70351	0.242548
3-Hydroxy-4-methylanthranilate	C8 H9 N O3	167.058	1.9	7244.81	52898.9	22401.7	48831.9	86386.5	59224.7	56312.2	78115.2	77782.1	83796.7	60252	73791.8		32844.3	70009.6	73905.6	21772.9	14581.2	9988.24		2.13156	0.0297003	2.25018	0.014001	1.05565	0.674751
Isoquinoline	C9 H7 N	129.057	7.229	2214.16	1729.08	1948.43	1647.71	1044.7	971.729	720.064	1164.58	2732.79	773.322	1764.59	790.25		1884.85	975.269	1515.24	253.63	187.796	934.642		0.517427	0.00118894	0.803906	0.474218	1.55366	0.30052
Furfural;Furan-2-carbaldehyde	C5 H4 O2	96.0211	5.326	106539	1716.11	1206.76	1026.78	1655.7	1500.41	1252.27	1338.04	1618.64	1186.51	1631.07	1502.89		27622.1	1436.6	1484.78	52611.8	178.67	207.053		0.0520093	0.357969	0.0537533	0.358791	1.03353	0.736655
PPG n4	C12 H26 O5	250.177	1.052	7409.42	5948.95	8249.84	4143.61	6845.37	5596.24	6244.13	3898.84	8975.23	2537.12	8182.17	3434.34		6437.96	5646.15	5782.21	1800.91	1271.65	3265.9		0.877009	0.499564	0.898144	0.737122	1.0241	0.940632
[FA(18:1)]9Z-Octadecen-12-ynoicacid	C18 H30 O2	278.224	0.919	31806.2	85277.4	25635.6	27871	43296.5	19020.4	23604.8	24314.3	27272.9	27207.4	21644.6	23259.8		42647.5	27559	24846.2	28534.1	10750.8	2842		0.646204	0.360554	0.582593	0.260725	0.901563	0.642928
N-Hydroxy-2-acetamidofluorene	C15 H13 N O2	239.094	2.013	61894.7	1850.94	1056.11	1141.29	1229.85	3075.23	1904.31	1835.99	1723	7692.37	763.28	1518.05		16485.8	2011.34	2924.17	30274.7	771.32	3205.47		0.122005	0.376037	0.177376	0.407275	1.45384	0.599769
[FA(18:2)]9Z_11E-octadecadienoicacid	C18 H32 O2	280.239	0.913	28221.3	61483.1	21702.7	18225.2	38188	17886.6	14957.4	16064.8	30742.8	24300.6	15042.6	23206.1		32408.1	21774.2	23323	19821.2	11009	6444.32		0.671876	0.384446	0.719667	0.416843	1.07113	0.816227
δ-Gluconic acid δ-lactone	C6 H10 O6	178.047	2.415	517344	916383	285635	442918	650453	392506	623670	366826	514457	427170	717874	496773		540570	508364	539069	268516	149378	125016		0.940421	0.840893	0.997223	0.992241	1.0604	0.763236
N-Acetylneuraminicacid(NeuAc)	C11 H19 N O9	309.105	4.549	129447	541240	1.9832e+06	546801	1.30634e+06	1.16072e+06	1.22931e+06	1.02097e+06	1.28526e+06	1.56798e+06	1.54562e+06	2.78808e+06		800172	1.17933e+06	1.79674e+06	812542	121183	673243		1.47385	0.391581	2.24544	0.107826	1.52352	0.121094
8-Oxocoformycin	C11 H14 N4 O5	282.093	5.96	2.33069e+07	3.97398e+07	4.617e+07	3.10125e+07	2.27297e+07	1.5948e+07	2.20582e+07	1.83896e+07	1.80979e+07	1.73862e+07	3.3557e+07	1.62231e+07		3.50573e+07	1.97814e+07	2.13161e+07	9.99753e+06	3.18893e+06	8.19713e+06		0.564259	0.0269306	0.608035	0.0776645	1.07758	0.739035
3-Hydroxy-2-methylpyridine-4_5-dicarboxylate	C8 H7 N O5	197.029	3.999	1.75081e+06	1.34493e+06	1.49085e+06	1.25915e+06	1.48462e+06	1.47547e+06	1.45031e+06	2.25426e+06	1.40019e+06	1.95681e+06	1.39496e+06	1.9764e+06		1.46144e+06	1.66617e+06	1.68209e+06	215324	392330	328634		1.14009	0.395509	1.15098	0.304265	1.00956	0.952407
N-Acetyl-L-cysteine	C5 H9 N O3 S	163.03	1.731	46020.5	143624	29013.1	70728.3	18516.6	39794.4	50691.3	25897.3	12584	13785.3	29789.5	131955		72346.6	33724.9	47028.5	50510.7	14344.1	57158.3		0.466158	0.191678	0.650044	0.531462	1.39447	0.667491
(4S)-4_6-Dihydroxy-2_5-dioxohexanoate	C6 H8 O6	176.031	4.366	143780	1.95511e+06	2.42243e+07	2.38488e+07	2.81539e+06	1.47338e+06	1.48692e+06	7.25828e+06	1.27989e+07	2.60824e+06	2.69407e+06	2.67456e+07		1.2543e+07	3.25849e+06	1.12117e+07	1.32931e+07	2.73981e+06	1.14074e+07		0.259786	0.22029	0.893861	0.884167	3.44076	0.223959
Deoxyuridine	C9 H12 N2 O5	228.071	3.976	20500.9	49993.6	71359.4	56578.9	36890.7	27331.3	38406.6	20675.3	25794	30460.7	39553	30871		49608.2	30826	31669.7	21362.7	8356.53	5737.86		0.621389	0.152623	0.638396	0.155943	1.02737	0.873263
Adipic acid	C6 H10 O4	146.057	1.505	1.82172e+07	1.05845e+06	3.105e+06	1.24534e+06	7.08138e+06	1.32353e+06	5.91452e+06	1.2085e+06	4.32586e+06	2.10798e+06	2.82579e+06	980886		5.9065e+06	3.88198e+06	2.56013e+06	8.25897e+06	3.05835e+06	1.40081e+06		0.657239	0.661884	0.433443	0.454775	0.65949	0.461822
Ethyl-β-D-glucuronide	C8 H14 O7	222.073	5.965	512227	7.38443e+06	3.40551e+06	6.81117e+06	3.47096e+06	2.69035e+06	3.11256e+06	2.9016e+06	2.76651e+06	2.79591e+06	5.67228e+06	2.54817e+06		4.52833e+06	3.04387e+06	3.44572e+06	3.202e+06	332838	1.48848e+06		0.672183	0.391978	0.760924	0.562255	1.13202	0.617146
3alpha_7alpha_12beta-Trihydroxy-5beta-cholanate	C24 H40 O5	408.286	1.229	4.57137e+06	2.98564e+06	9.21485e+06	4.71308e+06	1.7746e+06	1.53847e+06	2.99112e+06	3.58474e+06	1.22391e+06	4.01589e+06	2.1953e+06	2.50728e+06		5.37124e+06	2.47223e+06	2.48559e+06	2.67939e+06	977332	1.15735e+06		0.460273	0.088307	0.46276	0.0953705	1.0054	0.986498
1-Amino-1-deoxy-scyllo-inositol4-phosphate	C6 H14 N O8 P	259.044	8.846	7.94858e+06	458243	886743	521596	1.32045e+06	1.20452e+06	1.79324e+06	991645	708302	653737	836129	374418		2.45379e+06	1.32746e+06	643147	3.66806e+06	339062	194778		0.540985	0.563292	0.262103	0.362273	0.484493	0.0128247
Uric acid	C5 H4 N4 O3	168.027	4.41	1.12829e+06	3.03007e+06	2.87466e+06	4.12921e+06	645808	235732	113777	179130	325395	351583	613991	619409		2.79056e+06	293612	477595	1.24091e+06	240027	160996		0.105216	0.00752774	0.171147	0.0101259	1.62662	0.250066
3-(Uracil-1-yl)-L-alanine	C7 H9 N3 O4	199.056	3.873	1.3828e+06	559796	1.33536e+06	1.02344e+06	1.89053e+06	1.22844e+06	2.14445e+06	2.26209e+06	955685	3.68497e+06	3.18593e+06	929756		1.07535e+06	1.88138e+06	2.18909e+06	378868	462083	1.45357e+06		1.74955	0.035681	2.0357	0.188628	1.16356	0.700574
2-Methyl-3-hydroxybutyric acid	C5 H10 O3	118.062	1.598	978557	1.30371e+06	2.88337e+06	1.29821e+06	3.18101e+06	2.41214e+06	4.01654e+06	2.58483e+06	1.65413e+06	3.60116e+06	2.81714e+06	1.79113e+06		1.61596e+06	3.04863e+06	2.46589e+06	858501	724475	917691		1.88657	0.0434475	1.52596	0.224906	0.808851	0.357337
N-Acetyl-beta-D-galactosamine	C8 H15 N O6	221.089	3.939	756033	1.61409e+06	1.97999e+06	1.41538e+06	2.69338e+06	3.13821e+06	2.02647e+06	2.94813e+06	2.29932e+06	2.74456e+06	2.71889e+06	2.57688e+06		1.44137e+06	2.70155e+06	2.58491e+06	513259	485548	204177		1.87429	0.0118241	1.79337	0.00607579	0.956827	0.673385
Sebacicacid	C10 H18 O4	202.12	1.177	2.62323e+06	277258	551513	318527	978967	284462	1.05872e+06	252410	710448	334063	643452	258822		942632	643640	486696	1.12689e+06	434667	223503		0.682812	0.638138	0.516316	0.457583	0.756162	0.544479
4-Chlorophenylacetate	C8 H7 Cl O2	170.014	4.514	2.13329e+06	1.13036e+06	1.04372e+06	806575	965477	1.07806e+06	1.10863e+06	651438	794377	1.03387e+06	585520	628721		1.27848e+06	950902	760622	586072	208917	203192		0.743772	0.332892	0.59494	0.146012	0.799895	0.239441
Pimelic acid	C7 H12 O4	160.073	1.406	1.84652e+06	119184	310370	175143	792218	159288	776710	189012	491511	236989	580713	232817		612804	479307	385508	826382	352630	177683		0.782154	0.776361	0.629088	0.610062	0.804302	0.651521
Dodecanedioic acid	C12 H22 O4	230.151	1.145	1.0829e+06	156659	264530	225350	524930	215206	501011	206213	341663	173131	298935	211399		432359	361840	256282	435978	174822	77540.9		0.836897	0.774112	0.592753	0.456764	0.708274	0.311932
9,12-Dioxododecanoicacid	C12 H20 O4	228.135	1.165	1.07396e+06	109754	110172	182727	207014	84643.1	212887	165805	85854.1	83469.2	158011	64521		369152	167587	97963.9	471119	59131.1	41153.7		0.453979	0.428436	0.265375	0.295097	0.584554	0.101443
Ratios above 1.5 are shown in bold.
Ratios below 0.67 are shown in italics.
P-values ​​below 0.05 are shown in bold.

## Sheet: Suppl  Table 3
Supplementary Table 3. Primer sequences for quantitative RT-PCR.
Gene	Foward primer	Reverse primer	Product length (bp)
β-actin	TGAGGAGCACCCTGTGCT	ACATGGCTGGGGTGTTGAAG	104
Nrf2	CTGAACTCCTGGACGGGACTA	CGGTGGGTCTCCGTAAATGG	182
